# Supplementary material for: A combination of transcription factors mediates inducible interchromosomal contacts
Source: eLife journal article supplement (doi:10.7554/elife.42499), 2019-05-13

**A**

| TFs   |       |           |       |           |       | Nups |            |              |
|-------|-------|-----------|-------|-----------|-------|------|------------|--------------|
| ABF1  | CUP2  | GLN3      | MSN2  | RGM1      | STE12 | UME6 | ASM4       | NUP82        |
| ABF2  | CUP9  | GSM1      | MSN4  | RGT1 (x3) | STP1  | UPC2 | GLE2       | NUP84        |
| ACE2  | DAL80 | GZF3      | NHP6A | RLM1      | STP2  | URC2 | MLP1       | NUP85        |
| ADR1  | DAL82 | HAA1      | NHP10 | RME1      | STP3  | USV1 | MLP2       | NUP116       |
| AFT1  | DAT1  | HAC1      | NRG1  | ROX1      | STP4  | VHR1 | NUP1       | NUP133       |
| ARG5  | DOT6  | HAL9      | NRG2  | RPH1      | SUA7  | VHR2 | NUP2       | NUP159       |
| ARO80 | ECM22 | HCM1      | PDR1  | RPN4      | SUM1  | WAR1 | NUP42      | NUP170       |
| ASG1  | ECM23 | HSF1      | PDR8  | RSF2      | SUT1  | XBP1 | NUP49      | NUP188       |
| ASH1  | EDS1  | LEU3 (x3) | PHD1  | RTG3      | SUT2  | YAP1 | NUP53      | NUP192       |
| AZF1  | ERT1  | LYS14     | PHO2  | SFL1      | SWI4  | YAP3 | NUP57      | POM152       |
| BAS1  | FHL1  | MBP1      | PHO4  | SFP1      | SWI5  | YAP6 | NUP60      |              |
| CAD1  | FKH1  | MCM1      | PPR1  | SIP4      | TBF1  | YAP7 |            |              |
| CAT8  | FKH2  | MET31     | PUT3  | SKN7      | TBS1  | YHP1 |            |              |
| CBF1  | FYV5  | MET32     | PZF1  | SKO1      | TDA9  | YOX1 |            |              |
| CEP3  | GAL4  | MGA1      | RAP1  | SMP1      | TEA1  | YRM1 |            |              |
| CHA4  | GAT1  | MIG1 (x2) | RDR1  | SOK2      | TEC1  | ZAP1 |            |              |
| CIN5  | GAT3  | MIG2      | RDS1  | SPT10     | TOD6  |      | WT (x3)    | MPD1 (x2)    |
| CMR3  | GAT4  | MIG3      | RDS2  | SPT15     | TOG1  |      | ATG5 (x2)  | TRX2         |
| COM2  | GCN4  | MOT2      | REB1  | STB3      | TOS8  |      | BAP2 (x2)  | YOL107W (x2) |
| CRZ1  | GCR1  | MOT3      | REI1  | STB4      | TYE7  |      | CCW12 (x2) | YNL034W (x2) |
| CST6  | GIS1  | MSN1      | RFX1  | STB5      | UGA3  |      | FIT1 (x2)  |              |

**Controls**

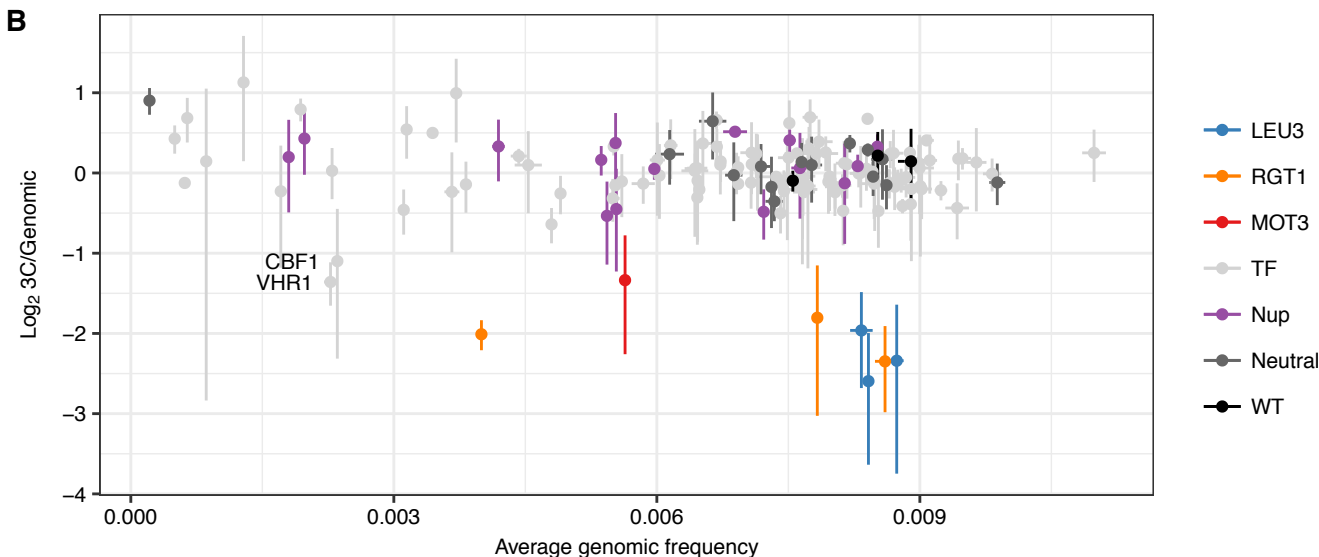

Supplement: supp [file elife-42499-supp-v1.zip]
