# Supplementary material for: A combination of transcription factors mediates inducible interchromosomal contacts
Source: eLife journal article supplement (doi:10.7554/elife.42499), 2019-05-13

|           |                     |                |          |                   |                  |                   |                |
|-----------|---------------------|----------------|----------|-------------------|------------------|-------------------|----------------|
| <i>Sc</i> | CCGGTACAGG          | CCCCAC         | AAATTCCG | TTTTTCCT          | CGGAAAAA         | TTATTCCG          | GTGGGG         |
| <i>Sp</i> | CCGGTACAGG          | CCCCAC         | AAATTCCG | TTTTTCCT          | CGGAAAAA         | TTATTCCG          | GTGGGG         |
| <i>Sm</i> | CCGGT <b>T</b> CAGG | <b>T</b> CCCAC | AAATTCCG | TTTTTCCT          | CGGAAAAA         | TTATTCCG          | GTGGGG         |
| <i>Sk</i> | CCGGTACAGG          | <b>GGA</b> CAC | AAATTCCG | TTTTTCCT          | CGGAAAAA         | TTATTCCG          | GTGGGG         |
| <i>Su</i> | CCGGTACAGG          | CCCCAC         | AAATTCCG | TTTTTCCA <b>A</b> | CGGAACA <b>A</b> | TT <b>G</b> TTCCG | <b>G</b> AGGGG |

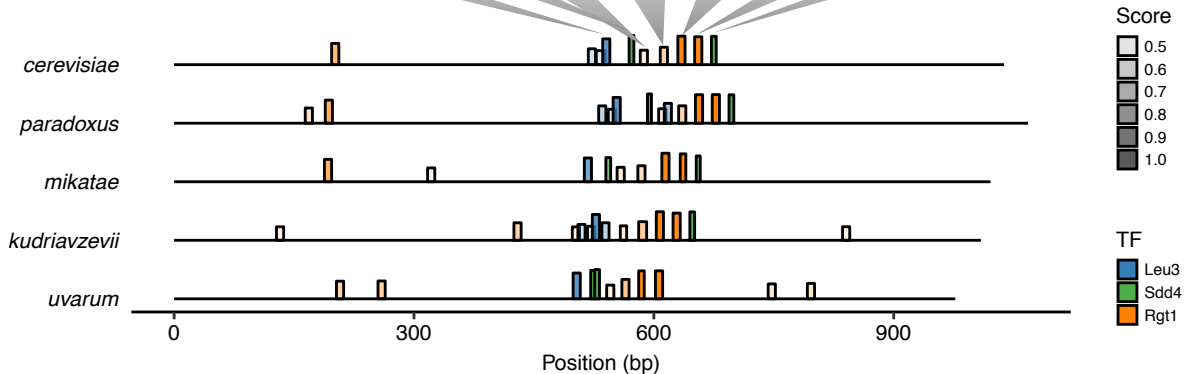

Supplement: supp [file elife-42499-supp-v1.zip]
