# Supplementary material for: A combination of transcription factors mediates inducible interchromosomal contacts
Source: eLife journal article supplement (doi:10.7554/elife.42499), 2019-05-13

**A**

TCTTAGCCGCCGAAGCTATCTCAGCCGGTACAGGCGCTCCTTGAATAA...  
TCTTAGCCGCCGAAGCTATCAGGCCGGTACAGGCGCTCCTTGAATAA...  
TCTTAGCCGCCGAAGCTATCCACGCCGGTACAGGCGCTCCTTGAATAA...  
TCTTAGCCGCCGAAGCTATCGAACCCGGTACAGGCGCTCCTTGAATAA...  
TCTTAGCCGCCGAAGCTATCGCCACCCGGTACAGGCGCTCCTTGAATAA...  
TCTTAGCCGCCGAAGCTATCGGGTCCGGTACAGGCGCTCCTTGAATAA...  
TCTTAGCCGCCGAAGCTATCGTCCACGGTACAGGCGCTCCTTGAATAA...  
TCTTAGCCGCCGAAGCTATCGTAAGCCGGTACAGGCGCTCCTTGAATAA...  
TCTTAGCCGCCGAAGCTATCGTGTTCGGTACAGGCGCTCCTTGAATAA...

⋮

**B**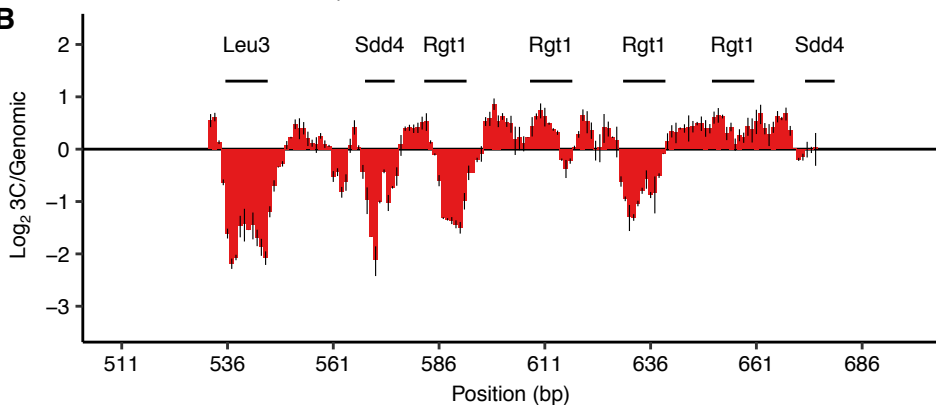**C**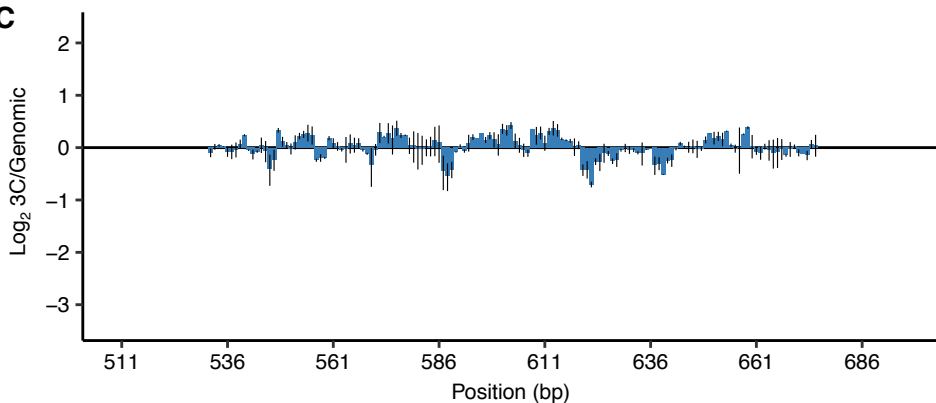

Supplement: supp [file elife-42499-supp-v1.zip]
