# Supplementary material for: A combination of transcription factors mediates inducible interchromosomal contacts
Source: eLife journal article supplement (doi:10.7554/elife.42499), 2019-05-13
Supplement: supp [file elife-42499-supp-v1.zip]

**A**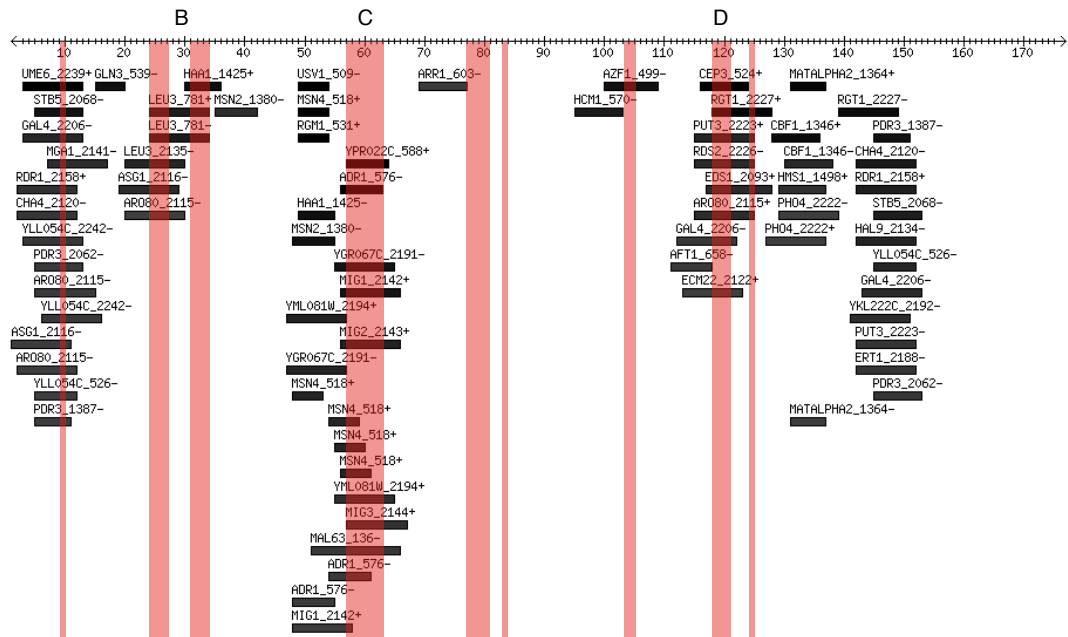**B**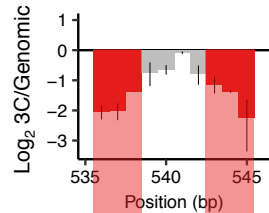**C**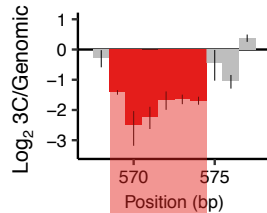**D**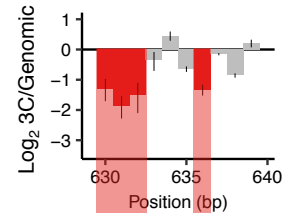

HAA1\_1425+ Bits

CCGC

GA

YPR022C\_588+ Bits

CCCCAC

CC

LEU3\_781+ Bits

cC

cG

ADR1\_576- Bits

CCCC

CC

LEU3\_781- Bits

cC

cG

YGR067C\_2191- Bits

CCCC

CC

LEU3\_2135- Bits

cC

cG

MIG1\_2142+ Bits

CCCC

CC

ASG1\_2116- Bits

CC

cG

MIG2\_2143+ Bits

CCCC

CC

ARO80\_2115- Bits

CC

cG

YML081W\_2194+ Bits

CCCC

CC

MIG3\_2144+ Bits

CCCC

CC

MAL63\_136- Bits

CC

cG

CEP3\_524+ Bits

TC

CCAA

RGT1\_2227+ Bits

cC

cG

PUT3\_2223+ Bits

CC

cG

RDS2\_2226- Bits

cC

cG

EDS1\_2093+ Bits

cC

cG

ARO80\_2115+ Bits

cC

cG

GAL4\_2206- Bits

cC

cG

ECM22\_2122+ Bits

cC

cG
