# Supplementary material for: A combination of transcription factors mediates inducible interchromosomal contacts
Source: eLife journal article supplement (doi:10.7554/elife.42499), 2019-05-13
Supplement: supp [file elife-42499-supp-v1.zip]

Archive with 22 entries (22 files):
- elife_poa_e42499_Supplementary_File_3.docx
- elife_poa_e42499_Figure_1_figure_supplement_2.pdf
- elife_poa_e42499_Figure_4_figure_supplement_2.pdf
- elife_poa_e42499_Figure_1_figure_supplement_5.pdf
- elife_poa_e42499_Figure_5_figure_supplement_1.pdf
- elife_poa_e42499_Figure_1_figure_supplement_4.pdf
- elife_poa_e42499_Figure_3_figure_supplement_2.pdf
- elife_poa_e42499_Figure_2_figure_supplement_4.pdf
- elife_poa_e42499_Supplementary_File_2.xlsx
- elife_poa_e42499_Figure_4_figure_supplement_1.pdf
- elife_poa_e42499_Figure_2_figure_supplement_3.pdf
- elife_poa_e42499_Supplementary_file_4.xlsx
- elife_poa_e42499_Transparent_Reporting_File.docx
- elife_poa_e42499_Figure_3_figure_supplement_4.pdf
- elife_poa_e42499_Figure_5_figure_supplement_2.pdf
- elife_poa_e42499_Figure_1_figure_supplement_3.pdf
- elife_poa_e42499_Supplementary_File_1.xlsx
- elife_poa_e42499_Figure_1_figure_supplement_1.pdf
- elife_poa_e42499_Figure_2_figure_supplement_1.pdf
- elife_poa_e42499_Figure_3_figure_supplement_1.pdf
- elife_poa_e42499_Figure_3_figure_supplement_3.pdf
- elife_poa_e42499_Figure_2_figure_supplement_2.pdf
