# Supplementary material for: A combination of transcription factors mediates inducible interchromosomal contacts
Source: eLife journal article supplement (doi:10.7554/elife.42499), 2019-05-13
Supplement: supp [file elife-42499-supp-v1.zip › elife_poa_e42499_Supplementary_File_1.xlsx]

## Sheet: individual primers
name	sequence	uses
SK814_mutreg4_F	TCTTAGCCGCCGAAGCTATC	ChIP-qPCR of L region; PCR of 3 bp substitutions
SK651_YMR290_mutreg_R_rc	CGCTATTCTTCAAATTCCGATTTCAGC	ChIP-qPCR of R region
SK776_TDA1pr2_R	GAATCGGCGGAATAACCTAACACG	error-prone PCR; ChIP-qPCR of R region
SK756_PRM1_CDS_F	TAACAAGATTTGTCATCCAGCCTGC	ChIP-qPCR of PRM1 CDS region
SK757_PRM1_CDS_R	CCTCCTATACAAAATGGCCAATATG	ChIP-qPCR of PRM1 CDS region
SK1030_LEU3_3F	TCACCCAATTCCATCATGGC	RT-qPCR of S. cerevisiae LEU3
SK1031_LEU3_3R	TTAAACCTTGGGATTGAACGCAA	RT-qPCR of S. cerevisiae LEU3
SK1032_SDD4_3F	CGGGATGATGCAGTTTATGAGAG	RT-qPCR of S. cerevisiae SDD4
SK1033_SDD4_3R	TGTTATGACAAGTGGGTGACG	RT-qPCR of S. cerevisiae SDD4
SK1034_RGT1_3F	CATTGCTTGATGAACGCCGTAC	RT-qPCR of S. cerevisiae RGT1
SK1035_RGT1_3R	ACCAGCCTAACTCGGAATCG	RT-qPCR of S. cerevisiae RGT1
SK770_ScACT1_CDS_F	TCCGTCTGGATTGGTGGTTC	RT-qPCR of S. cerevisiae ACT1
SK771_ScACT1_CDS_R	CTTGTGGTGAACGATAGATGGAC	RT-qPCR of S. cerevisiae ACT1
SK976_SbYMR290-291_3C_NlaIII	TCGGAATTTGGGTCATTTGCG	Z3EV overexpression 3C interchromosomal PCR
SK555_YMR296Rval_R	CATTGAGCCATACGAAGAGG	Z3EV overexpression 3C intrachromosomal PCR; galactose-induced overexpression 3C intrachromosomal PCR
SK778_TDA1pr3_R	CAGGAGTCTTGGTAGCACCC	Z3EV overexpression 3C PCRs; PCR of 3 bp substitutions
SK649_Sbay_3C_1	CCTACCTTTGGCAAAGGTCATG	galactose-induced overexpression 3C interchromosomal PCR
SK642_YMR290_mutreg_R	GCTGAAATCGGAATTTGAAGAATAGCG	galactose-induced overexpression 3C PCRs; ChIP-qPCR of L region
SK260_YKO-U1	GATGTCCACGAGGTCTCT	ectopic pairing 3C interchromosomal PCR
SK828_ScHAS1cds_EcoRI_3C	GGCTTTACAGATTTTTGGAGTGG	ectopic pairing 3C intrachromosomal PCR
SK829_ScYMR286cds_EcoRI_3C	TATCTTGATCGGCACTACGC	ectopic pairing 3C PCRs
SK772_mutreg_mid_F	TTCACCGCCTGCTATCATCC	error-prone PCR
SK754_new_ins_scan_F	GTGAATGCTGGTCGCTATACTGGATC	PCR of subsequences
SK674_YMR290_ins_scan_R	GAAGCAGAAGAACTAGCTGTAGTCAT	PCR of subsequences
SK635_URA3_5F	CTGCTACTCATCCTAGTCCTGTT	cloning URA3
SK636_URA3_3R	CTTCTCAAATATGCTTCCCAGC	cloning URA3
SK946_Rgt1-prom_F	cgagatagggttgagtgttgttcTCATGTAGCATGTGCGCTAAC	cloning pairing-URA3-RGT1 and variant plasmids
SK947_Rgt1-term_R	gcctgcaggtcgactctagaggatccTACCGTGGAAGATGGTGGAG	cloning pairing-URA3-RGT1 and variant plasmids
SK952_YDR535_Rgt1-term_R	gctagaccatgtgccagaagtgTACCGTGGAAGATGGTGGAG	cloning pairing-URA3-RGT1 and variant plasmids
SK950_Rgt1-delZF_F_new	ATATGGACTCCGCAGCAGCATATACGAGGAGCACCAGCC	cloning pairing-URA3-RGT1ΔZn finger domain plasmid
SK951_Rgt1-delZF_R_new	GGCTGGTGCTCCTCGTATATGCTGCTGCGGAGTCCATAT	cloning pairing-URA3-RGT1ΔZn finger domain plasmid
SK960_Rgt1-delQN2_F	CCTTCTTTGCTACGAAATACTTCAGCTTTGGAAGCATCCAGCC	cloning pairing-URA3-RGT1ΔQ/N-rich domain plasmid
SK961_Rgt1-delQN2_R	GGCTGGATGCTTCCAAAGCTGAAGTATTTCGTAGCAAAGAAGG	cloning pairing-URA3-RGT1ΔQ/N-rich domain plasmid
SK958_Rgt1-delCterm_F	GTAACTACACCAGCGGCTTTGGATTCCGAGTTAGGCTGGTATTGA	cloning pairing-URA3-RGT1ΔC-terminal domain plasmid
SK959_Rgt1-delCterm_R	TCAATACCAGCCTAACTCGGAATCCAAAGCCGCTGGTGTAGTTAC	cloning pairing-URA3-RGT1ΔC-terminal domain plasmid
SK1027_ScRGT1_S88A_R	GGGTCCCCTTTTCAAAGGAAC	cloning pairing-URA3-RGT1(S88A) plasmid
SK1028_ScRGT1_S88A_F	GTTCCTTTGAAAAGGGGACCCGCGAAAGGCTATACGAGGAGCAC	cloning pairing-URA3-RGT1(S88A) plasmid
SK1015_ScRGT1_S758A_R	ATTTGGTGAATTGGATGGATTCATATGCC	cloning pairing-URA3-RGT1(S758A) plasmid
SK1016_ScRGT1_S758A_F	GGCATATGAATCCATCCAATTCACCAAATGCCATGGACGAAAACATTAGTCACTATTCAG	cloning pairing-URA3-RGT1(S758A) plasmid
SK671_pUC19_valF	aactgttgggaagggcgatc	Sanger verification of plasmids
SK672_pUC19_valR	actttatgcttccggctcgtatg	Sanger verification of plasmids
SK954_ScRGT1_fw	ATGAACGAGCTGAACACTGTTTC	Sanger verification of pairing-URA3-RGT1 and variant plasmids
SK955_ScRGT1_QNval_F	AATCCCAACGAGCAGTTGTC	Sanger verification of pairing-URA3-RGT1 and variant plasmids
SK634_URA3_3F	GCTGGGAAGCATATTTGAGAAG	Sanger verification of pairing-URA3-RGT1 and variant plasmids
SK965_Rgt1-delQN_inv_F	GAATCTGTAACTACACCAGCGGCT	Sanger verification of pairing-URA3-RGT1 and variant plasmids
SK968_Rgt1_valR1	GGCAAAGGTCTGAAAGGATAGTG	Sanger verification of pairing-URA3-RGT1 and variant plasmids
SK995_ScRGT1_del_seq_1	GGGTCTGCTCAAACTGCCAA	Sanger verification of pairing-URA3-RGT1 and variant plasmids
SK996_ScRGT1_del_seq_2	CCCCACCTCAGCAACAATC	Sanger verification of pairing-URA3-RGT1 and variant plasmids
SK997_ScRGT1_del_seq_3	GGTAAGCTCACTCATCAATTCACC	Sanger verification of pairing-URA3-RGT1 and variant plasmids
SK998_ScRGT1_del_seq_4	GCGTTCATCAAGCAATGTCTTC	Sanger verification of pairing-URA3-RGT1 and variant plasmids
SK1001_AmpR_int_F	tggtatggcttcattcagctcc	cloning pairing-URA3-RGT1 variant plasmids
SK1002_AmpR_int_R	ggaaccggagctgaatgaag	cloning pairing-URA3-RGT1 variant plasmids
SK850_ScYDR535C_3C_F	CAAAGTTACCGCGCCAATCG	colony PCR and Sanger verification of fixed-locus trans MAP-C transformants
SK633_URA3_5R	AACAGGACTAGGATGAGTAGCAG	colony PCR verification of fixed-locus trans MAP-C transformants
SK647_pUC19-YMR290inter_Lhom_F	GAATTCGAGCTCGGTACCCGGGGATCCCACTCCAAAAATCTGTAAAGCC	cloning ScHAS1pr-TDA1pr_WT plasmid
SK670_pUC19-YMR290inter_Rhom_R2	GCCTGCAGGTCGACTCTAGAGGATCCTTCATCGCGTACAAATCCTTTGTG	cloning ScHAS1pr-TDA1pr_WT plasmid
SK851_mutreg4_F_rc	GATAGCTTCGGCGGCTAAGA	cloning ScHAS1pr-TDA1pr_leu3 plasmid
SK852_leu3_inv_fw	GTTGattaTACAGGCGCTCCTTGAATAACC	cloning ScHAS1pr-TDA1pr_leu3 plasmid
SK853_rgt1_inv_rv	GAGGTGCCAAAAAAGGAAAAAC	cloning ScHAS1pr-TDA1pr_rgt1x2 plasmid
SK854_rgt1_inv_fw	atAAAAACCTCCACGTGTTAGGTTATTgCaCCGATTCCACGGGTGGG	cloning ScHAS1pr-TDA1pr_rgt1x2 plasmid
SK735_ScHAS1pr-GATC-MX3_Rv	GCTGAGCAATATTAACAGGAGAAGTGATCCAGTATAGCGACCAGCATTCAC	cloning KanMX-ScHAS1pr plasmid
SK736_ScHAS1cod-MX5_Fw	ACGTTTATTTGACGGGGTAGCCATCGACATGGAGGCCCAGAATAC	cloning KanMX-ScHAS1pr plasmid
SK737_MX3-GATC-ScHAS1pr_Fw	GTGAATGCTGGTCGCTATACTGGATCACTTCTCCTGTTAATATTGCTCAGC	cloning KanMX-ScHAS1pr plasmid
SK738_MX5-ScHAS1cod_Rv	GTATTCTGGGCCTCCATGTCGATGGCTACCCCGTCAAATAAACGT	cloning KanMX-ScHAS1pr plasmid
SK617_URA3_F	CTTGTCTGTAAGCGGATGCC	cloning pairing-URA3 and nonpairing-URA3 plasmids
SK815_pUC19-mutreg4_F	GAATTCGAGCTCGGTACCCGGGGATCCTCTTAGCCGCCGAAGCTATC	cloning pairing-URA3 plasmid
SK816_URA3-GAATTC-TDA1pr3_rv	ggcatccgcttacagacaagGAATTCCAGGAGTCTTGGTAGCACCC	cloning pairing-URA3 plasmid
SK817_pUC19-YMR290interF	GAATTCGAGCTCGGTACCCGGGGATCCTCTTAGTCGTCATACACTCCTC	cloning pairing-URA3 and nonpairing-URA3 plasmids
SK818_URA3-GAATTC-mutregF_rc	ggcatccgcttacagacaagGAATTCGTGGAAAATGATTTGATAGGCGCA	cloning pairing-URA3 and nonpairing-URA3 plasmids
SK819_pUC19-URA3_rv	GCCTGCAGGTCGACTCTAGAGGATCCgaacaacactcaaccctatctcg	cloning pairing-URA3 and nonpairing-URA3 plasmids
SK821_MX5_-90_bc_mutreg4_F	CCGGGTCACCCGGCCAGCCNNNNGCNNNNGTCTTAGCCGCCGAAGCTATC	amplifying pairing-URA3 construct for yeast transformation to make in-gene KO library
SK822_MX5_-90_bc_YMR290interF	CCGGGTCACCCGGCCAGCCNNNNGCNNNNGTCTTAGTCGTCATACACTCCTC	amplifying nonpairing-URA3 construct for yeast transformation to make in-gene KO library
SK824_MX3_-90_URA3_rv	CGACCAGCATTCACATACGATTGgaacaacactcaaccctatctcg	amplifying pairing-URA3 and nonpairing-URA3 constructs for yeast transformation to make in-gene KO library
SK820_MX5_-90	CGTACGCTGCAGGTCGACGGATCCCCGGGTTAATTAAGGCGCGCCAGATCTGTTTAGCTTGCCTCGTCCCCGCCGGGTCACCCGGCCAGC	amplifying pairing-URA3 and nonpairing-URA3 constructs for yeast transformation to make in-gene KO library
SK823_MX3_-90	ATCGATGAATTCGAGCTCGTTTTCGACACTGGATGGCGGCGTTAGTATCGAATCGACAGCAGTATAGCGACCAGCATTCACATACGATTG	amplifying pairing-URA3 and nonpairing-URA3 constructs for yeast transformation to make in-gene KO library
SK835_YDR535_hom_L-ampseqF	GAATGTCAGTTTTCAACATTGAAACATCAGATAATGTTGGTATCGTGTTTAAATGATGGACGCATCTACGTCGGCTGTGAGAGAGCTCAG	amplifying pairing-URA3 construct for yeast transformation to make fixed-locus KO libraries
SK836_YDR535_hom_R-URA3_rv	GCTAGACCATGTGCCAGAAGTGgaacaacactcaaccctatctcg	amplifying pairing-URA3 construct for yeast transformation to make fixed-locus KO libraries
SK837_YDR535_hom_R	GTTGGATAAACGGACAGGTTGAAGTGCAACGTTATTCAATGGTGACAGTTGCTTCTGGACTAAGAAAGGCTAGACCATGTGCCAGAAGTG	amplifying pairing-URA3 construct for yeast transformation to make fixed-locus KO libraries
SK952_YDR535_Rgt1-term_R	gctagaccatgtgccagaagtgTACCGTGGAAGATGGTGGAG	amplifying pairing-URA3 construct for yeast transformation to make Rgt1 mutant libraries
SK755_GATC-MX3_R	GATCCAGTATAGCGACCAGCATTCAC	amplifying KanMX-ScHAS1pr plasmid to clone subsequences library
SK676_YMR290_ins_scan_R_rc	ATGACTACAGCTAGTTCTTCTGCTTC	amplifying KanMX-ScHAS1pr plasmid to clone subsequences library
SK808_mutreg_mid_R-GATC-MX3_R	GGATGATAGCAGGCGGTGAAGATCCAGTATAGCGACCAGCATTCAC	amplifying KanMX-ScHAS1pr plasmid to clone error-prone PCR library
SK809_TDA1pr2_F-ins_scan_Rrc	CGTGTTAGGTTATTCCGCCGATTCATGACTACAGCTAGTTCTTCTGCTTC	amplifying KanMX-ScHAS1pr plasmid to clone error-prone PCR library
SK880_mutreg4_Frc_GATC_MX3_R	GATAGCTTCGGCGGCTAAGAGATCCAGTATAGCGACCAGCATTCAC	amplifying KanMX-ScHAS1pr plasmid to clone 3 bp substitution library
SK881_TDA1pr3_R_ins_scan_R_rc	GGGTGCTACCAAGACTCCTGATGACTACAGCTAGTTCTTCTGCTTC	amplifying KanMX-ScHAS1pr plasmid to clone 3 bp substitution library
SK581_Scer_YMR290inter_F	TCTTAGTCGTCATACACTCCTC	amplifying ScHAS1pr-TDA1pr plasmids for yeast transformation
SK782_TDA1pr5_R	AAGAAGTCATCCCCGTTCGAC	amplifying ScHAS1pr-TDA1pr plasmids for yeast transformation

## Sheet: subsequences
GTGAATGCTGGTCGCTATACTGGATCACTTCTCCTGTTAATATTGCTCAGCTTATCTAATTATTATAGTATACAGTTATCCAATAGCTATGTACTCAAGTACCGTGTATACACTATAAAATCTCATCTCATCGCTAAAGCTAATATTGAAAAAAAAAAAAAAAAAAAAAAGAAAAAGCAAATAAAAAATTTTCAATTCGGGTAAATGACTACAGCTAGTTCTTCTGCTTC
GTGAATGCTGGTCGCTATACTGGATCCTTCTCCTGTTAATATTGCTCAGCTTATCTAATTATTATAGTATACAGTTATCCAATAGCTATGTACTCAAGTACCGTGTATACACTATAAAATCTCATCTCATCGCTAAAGCTAATATTGAAAAAAAAAAAAAAAAAAAAAAGAAAAAGCAAATAAAAAATTTTCAATTCGGGTAACATGACTACAGCTAGTTCTTCTGCTTC
GTGAATGCTGGTCGCTATACTGGATCTTCTCCTGTTAATATTGCTCAGCTTATCTAATTATTATAGTATACAGTTATCCAATAGCTATGTACTCAAGTACCGTGTATACACTATAAAATCTCATCTCATCGCTAAAGCTAATATTGAAAAAAAAAAAAAAAAAAAAAAGAAAAAGCAAATAAAAAATTTTCAATTCGGGTAACGATGACTACAGCTAGTTCTTCTGCTTC
GTGAATGCTGGTCGCTATACTGGATCTCTCCTGTTAATATTGCTCAGCTTATCTAATTATTATAGTATACAGTTATCCAATAGCTATGTACTCAAGTACCGTGTATACACTATAAAATCTCATCTCATCGCTAAAGCTAATATTGAAAAAAAAAAAAAAAAAAAAAAGAAAAAGCAAATAAAAAATTTTCAATTCGGGTAACGAATGACTACAGCTAGTTCTTCTGCTTC
GTGAATGCTGGTCGCTATACTGGATCCTCCTGTTAATATTGCTCAGCTTATCTAATTATTATAGTATACAGTTATCCAATAGCTATGTACTCAAGTACCGTGTATACACTATAAAATCTCATCTCATCGCTAAAGCTAATATTGAAAAAAAAAAAAAAAAAAAAAAGAAAAAGCAAATAAAAAATTTTCAATTCGGGTAACGAAATGACTACAGCTAGTTCTTCTGCTTC
GTGAATGCTGGTCGCTATACTGGATCTCCTGTTAATATTGCTCAGCTTATCTAATTATTATAGTATACAGTTATCCAATAGCTATGTACTCAAGTACCGTGTATACACTATAAAATCTCATCTCATCGCTAAAGCTAATATTGAAAAAAAAAAAAAAAAAAAAAAGAAAAAGCAAATAAAAAATTTTCAATTCGGGTAACGAAGATGACTACAGCTAGTTCTTCTGCTTC
GTGAATGCTGGTCGCTATACTGGATCCCTGTTAATATTGCTCAGCTTATCTAATTATTATAGTATACAGTTATCCAATAGCTATGTACTCAAGTACCGTGTATACACTATAAAATCTCATCTCATCGCTAAAGCTAATATTGAAAAAAAAAAAAAAAAAAAAAAGAAAAAGCAAATAAAAAATTTTCAATTCGGGTAACGAAGAATGACTACAGCTAGTTCTTCTGCTTC
GTGAATGCTGGTCGCTATACTGGATCCTGTTAATATTGCTCAGCTTATCTAATTATTATAGTATACAGTTATCCAATAGCTATGTACTCAAGTACCGTGTATACACTATAAAATCTCATCTCATCGCTAAAGCTAATATTGAAAAAAAAAAAAAAAAAAAAAAGAAAAAGCAAATAAAAAATTTTCAATTCGGGTAACGAAGAAATGACTACAGCTAGTTCTTCTGCTTC
GTGAATGCTGGTCGCTATACTGGATCTGTTAATATTGCTCAGCTTATCTAATTATTATAGTATACAGTTATCCAATAGCTATGTACTCAAGTACCGTGTATACACTATAAAATCTCATCTCATCGCTAAAGCTAATATTGAAAAAAAAAAAAAAAAAAAAAAGAAAAAGCAAATAAAAAATTTTCAATTCGGGTAACGAAGAATATGACTACAGCTAGTTCTTCTGCTTC
GTGAATGCTGGTCGCTATACTGGATCGTTAATATTGCTCAGCTTATCTAATTATTATAGTATACAGTTATCCAATAGCTATGTACTCAAGTACCGTGTATACACTATAAAATCTCATCTCATCGCTAAAGCTAATATTGAAAAAAAAAAAAAAAAAAAAAAGAAAAAGCAAATAAAAAATTTTCAATTCGGGTAACGAAGAATCATGACTACAGCTAGTTCTTCTGCTTC
GTGAATGCTGGTCGCTATACTGGATCTTAATATTGCTCAGCTTATCTAATTATTATAGTATACAGTTATCCAATAGCTATGTACTCAAGTACCGTGTATACACTATAAAATCTCATCTCATCGCTAAAGCTAATATTGAAAAAAAAAAAAAAAAAAAAAAGAAAAAGCAAATAAAAAATTTTCAATTCGGGTAACGAAGAATCGATGACTACAGCTAGTTCTTCTGCTTC
GTGAATGCTGGTCGCTATACTGGATCTAATATTGCTCAGCTTATCTAATTATTATAGTATACAGTTATCCAATAGCTATGTACTCAAGTACCGTGTATACACTATAAAATCTCATCTCATCGCTAAAGCTAATATTGAAAAAAAAAAAAAAAAAAAAAAGAAAAAGCAAATAAAAAATTTTCAATTCGGGTAACGAAGAATCGAATGACTACAGCTAGTTCTTCTGCTTC
GTGAATGCTGGTCGCTATACTGGATCAATATTGCTCAGCTTATCTAATTATTATAGTATACAGTTATCCAATAGCTATGTACTCAAGTACCGTGTATACACTATAAAATCTCATCTCATCGCTAAAGCTAATATTGAAAAAAAAAAAAAAAAAAAAAAGAAAAAGCAAATAAAAAATTTTCAATTCGGGTAACGAAGAATCGACATGACTACAGCTAGTTCTTCTGCTTC
GTGAATGCTGGTCGCTATACTGGATCATATTGCTCAGCTTATCTAATTATTATAGTATACAGTTATCCAATAGCTATGTACTCAAGTACCGTGTATACACTATAAAATCTCATCTCATCGCTAAAGCTAATATTGAAAAAAAAAAAAAAAAAAAAAAGAAAAAGCAAATAAAAAATTTTCAATTCGGGTAACGAAGAATCGACTATGACTACAGCTAGTTCTTCTGCTTC
GTGAATGCTGGTCGCTATACTGGATCTATTGCTCAGCTTATCTAATTATTATAGTATACAGTTATCCAATAGCTATGTACTCAAGTACCGTGTATACACTATAAAATCTCATCTCATCGCTAAAGCTAATATTGAAAAAAAAAAAAAAAAAAAAAAGAAAAAGCAAATAAAAAATTTTCAATTCGGGTAACGAAGAATCGACTCATGACTACAGCTAGTTCTTCTGCTTC
GTGAATGCTGGTCGCTATACTGGATCATTGCTCAGCTTATCTAATTATTATAGTATACAGTTATCCAATAGCTATGTACTCAAGTACCGTGTATACACTATAAAATCTCATCTCATCGCTAAAGCTAATATTGAAAAAAAAAAAAAAAAAAAAAAGAAAAAGCAAATAAAAAATTTTCAATTCGGGTAACGAAGAATCGACTCTATGACTACAGCTAGTTCTTCTGCTTC
GTGAATGCTGGTCGCTATACTGGATCTTGCTCAGCTTATCTAATTATTATAGTATACAGTTATCCAATAGCTATGTACTCAAGTACCGTGTATACACTATAAAATCTCATCTCATCGCTAAAGCTAATATTGAAAAAAAAAAAAAAAAAAAAAAGAAAAAGCAAATAAAAAATTTTCAATTCGGGTAACGAAGAATCGACTCTCATGACTACAGCTAGTTCTTCTGCTTC
GTGAATGCTGGTCGCTATACTGGATCTGCTCAGCTTATCTAATTATTATAGTATACAGTTATCCAATAGCTATGTACTCAAGTACCGTGTATACACTATAAAATCTCATCTCATCGCTAAAGCTAATATTGAAAAAAAAAAAAAAAAAAAAAAGAAAAAGCAAATAAAAAATTTTCAATTCGGGTAACGAAGAATCGACTCTCGATGACTACAGCTAGTTCTTCTGCTTC
GTGAATGCTGGTCGCTATACTGGATCGCTCAGCTTATCTAATTATTATAGTATACAGTTATCCAATAGCTATGTACTCAAGTACCGTGTATACACTATAAAATCTCATCTCATCGCTAAAGCTAATATTGAAAAAAAAAAAAAAAAAAAAAAGAAAAAGCAAATAAAAAATTTTCAATTCGGGTAACGAAGAATCGACTCTCGCATGACTACAGCTAGTTCTTCTGCTTC
GTGAATGCTGGTCGCTATACTGGATCCTCAGCTTATCTAATTATTATAGTATACAGTTATCCAATAGCTATGTACTCAAGTACCGTGTATACACTATAAAATCTCATCTCATCGCTAAAGCTAATATTGAAAAAAAAAAAAAAAAAAAAAAGAAAAAGCAAATAAAAAATTTTCAATTCGGGTAACGAAGAATCGACTCTCGCCATGACTACAGCTAGTTCTTCTGCTTC
GTGAATGCTGGTCGCTATACTGGATCTCAGCTTATCTAATTATTATAGTATACAGTTATCCAATAGCTATGTACTCAAGTACCGTGTATACACTATAAAATCTCATCTCATCGCTAAAGCTAATATTGAAAAAAAAAAAAAAAAAAAAAAGAAAAAGCAAATAAAAAATTTTCAATTCGGGTAACGAAGAATCGACTCTCGCCGATGACTACAGCTAGTTCTTCTGCTTC
GTGAATGCTGGTCGCTATACTGGATCCAGCTTATCTAATTATTATAGTATACAGTTATCCAATAGCTATGTACTCAAGTACCGTGTATACACTATAAAATCTCATCTCATCGCTAAAGCTAATATTGAAAAAAAAAAAAAAAAAAAAAAGAAAAAGCAAATAAAAAATTTTCAATTCGGGTAACGAAGAATCGACTCTCGCCGGATGACTACAGCTAGTTCTTCTGCTTC
GTGAATGCTGGTCGCTATACTGGATCAGCTTATCTAATTATTATAGTATACAGTTATCCAATAGCTATGTACTCAAGTACCGTGTATACACTATAAAATCTCATCTCATCGCTAAAGCTAATATTGAAAAAAAAAAAAAAAAAAAAAAGAAAAAGCAAATAAAAAATTTTCAATTCGGGTAACGAAGAATCGACTCTCGCCGGGATGACTACAGCTAGTTCTTCTGCTTC
GTGAATGCTGGTCGCTATACTGGATCGCTTATCTAATTATTATAGTATACAGTTATCCAATAGCTATGTACTCAAGTACCGTGTATACACTATAAAATCTCATCTCATCGCTAAAGCTAATATTGAAAAAAAAAAAAAAAAAAAAAAGAAAAAGCAAATAAAAAATTTTCAATTCGGGTAACGAAGAATCGACTCTCGCCGGGTATGACTACAGCTAGTTCTTCTGCTTC
GTGAATGCTGGTCGCTATACTGGATCCTTATCTAATTATTATAGTATACAGTTATCCAATAGCTATGTACTCAAGTACCGTGTATACACTATAAAATCTCATCTCATCGCTAAAGCTAATATTGAAAAAAAAAAAAAAAAAAAAAAGAAAAAGCAAATAAAAAATTTTCAATTCGGGTAACGAAGAATCGACTCTCGCCGGGTAATGACTACAGCTAGTTCTTCTGCTTC
GTGAATGCTGGTCGCTATACTGGATCTTATCTAATTATTATAGTATACAGTTATCCAATAGCTATGTACTCAAGTACCGTGTATACACTATAAAATCTCATCTCATCGCTAAAGCTAATATTGAAAAAAAAAAAAAAAAAAAAAAGAAAAAGCAAATAAAAAATTTTCAATTCGGGTAACGAAGAATCGACTCTCGCCGGGTAAATGACTACAGCTAGTTCTTCTGCTTC
GTGAATGCTGGTCGCTATACTGGATCTATCTAATTATTATAGTATACAGTTATCCAATAGCTATGTACTCAAGTACCGTGTATACACTATAAAATCTCATCTCATCGCTAAAGCTAATATTGAAAAAAAAAAAAAAAAAAAAAAGAAAAAGCAAATAAAAAATTTTCAATTCGGGTAACGAAGAATCGACTCTCGCCGGGTAAAATGACTACAGCTAGTTCTTCTGCTTC
GTGAATGCTGGTCGCTATACTGGATCATCTAATTATTATAGTATACAGTTATCCAATAGCTATGTACTCAAGTACCGTGTATACACTATAAAATCTCATCTCATCGCTAAAGCTAATATTGAAAAAAAAAAAAAAAAAAAAAAGAAAAAGCAAATAAAAAATTTTCAATTCGGGTAACGAAGAATCGACTCTCGCCGGGTAAACATGACTACAGCTAGTTCTTCTGCTTC
GTGAATGCTGGTCGCTATACTGGATCTCTAATTATTATAGTATACAGTTATCCAATAGCTATGTACTCAAGTACCGTGTATACACTATAAAATCTCATCTCATCGCTAAAGCTAATATTGAAAAAAAAAAAAAAAAAAAAAAGAAAAAGCAAATAAAAAATTTTCAATTCGGGTAACGAAGAATCGACTCTCGCCGGGTAAACAATGACTACAGCTAGTTCTTCTGCTTC
GTGAATGCTGGTCGCTATACTGGATCCTAATTATTATAGTATACAGTTATCCAATAGCTATGTACTCAAGTACCGTGTATACACTATAAAATCTCATCTCATCGCTAAAGCTAATATTGAAAAAAAAAAAAAAAAAAAAAAGAAAAAGCAAATAAAAAATTTTCAATTCGGGTAACGAAGAATCGACTCTCGCCGGGTAAACAAATGACTACAGCTAGTTCTTCTGCTTC
GTGAATGCTGGTCGCTATACTGGATCTAATTATTATAGTATACAGTTATCCAATAGCTATGTACTCAAGTACCGTGTATACACTATAAAATCTCATCTCATCGCTAAAGCTAATATTGAAAAAAAAAAAAAAAAAAAAAAGAAAAAGCAAATAAAAAATTTTCAATTCGGGTAACGAAGAATCGACTCTCGCCGGGTAAACAATATGACTACAGCTAGTTCTTCTGCTTC
GTGAATGCTGGTCGCTATACTGGATCAATTATTATAGTATACAGTTATCCAATAGCTATGTACTCAAGTACCGTGTATACACTATAAAATCTCATCTCATCGCTAAAGCTAATATTGAAAAAAAAAAAAAAAAAAAAAAGAAAAAGCAAATAAAAAATTTTCAATTCGGGTAACGAAGAATCGACTCTCGCCGGGTAAACAATTATGACTACAGCTAGTTCTTCTGCTTC
GTGAATGCTGGTCGCTATACTGGATCATTATTATAGTATACAGTTATCCAATAGCTATGTACTCAAGTACCGTGTATACACTATAAAATCTCATCTCATCGCTAAAGCTAATATTGAAAAAAAAAAAAAAAAAAAAAAGAAAAAGCAAATAAAAAATTTTCAATTCGGGTAACGAAGAATCGACTCTCGCCGGGTAAACAATTCATGACTACAGCTAGTTCTTCTGCTTC
GTGAATGCTGGTCGCTATACTGGATCTTATTATAGTATACAGTTATCCAATAGCTATGTACTCAAGTACCGTGTATACACTATAAAATCTCATCTCATCGCTAAAGCTAATATTGAAAAAAAAAAAAAAAAAAAAAAGAAAAAGCAAATAAAAAATTTTCAATTCGGGTAACGAAGAATCGACTCTCGCCGGGTAAACAATTCTATGACTACAGCTAGTTCTTCTGCTTC
GTGAATGCTGGTCGCTATACTGGATCTATTATAGTATACAGTTATCCAATAGCTATGTACTCAAGTACCGTGTATACACTATAAAATCTCATCTCATCGCTAAAGCTAATATTGAAAAAAAAAAAAAAAAAAAAAAGAAAAAGCAAATAAAAAATTTTCAATTCGGGTAACGAAGAATCGACTCTCGCCGGGTAAACAATTCTTATGACTACAGCTAGTTCTTCTGCTTC
GTGAATGCTGGTCGCTATACTGGATCATTATAGTATACAGTTATCCAATAGCTATGTACTCAAGTACCGTGTATACACTATAAAATCTCATCTCATCGCTAAAGCTAATATTGAAAAAAAAAAAAAAAAAAAAAAGAAAAAGCAAATAAAAAATTTTCAATTCGGGTAACGAAGAATCGACTCTCGCCGGGTAAACAATTCTTAATGACTACAGCTAGTTCTTCTGCTTC
GTGAATGCTGGTCGCTATACTGGATCTTATAGTATACAGTTATCCAATAGCTATGTACTCAAGTACCGTGTATACACTATAAAATCTCATCTCATCGCTAAAGCTAATATTGAAAAAAAAAAAAAAAAAAAAAAGAAAAAGCAAATAAAAAATTTTCAATTCGGGTAACGAAGAATCGACTCTCGCCGGGTAAACAATTCTTAGATGACTACAGCTAGTTCTTCTGCTTC
GTGAATGCTGGTCGCTATACTGGATCTATAGTATACAGTTATCCAATAGCTATGTACTCAAGTACCGTGTATACACTATAAAATCTCATCTCATCGCTAAAGCTAATATTGAAAAAAAAAAAAAAAAAAAAAAGAAAAAGCAAATAAAAAATTTTCAATTCGGGTAACGAAGAATCGACTCTCGCCGGGTAAACAATTCTTAGTATGACTACAGCTAGTTCTTCTGCTTC
GTGAATGCTGGTCGCTATACTGGATCATAGTATACAGTTATCCAATAGCTATGTACTCAAGTACCGTGTATACACTATAAAATCTCATCTCATCGCTAAAGCTAATATTGAAAAAAAAAAAAAAAAAAAAAAGAAAAAGCAAATAAAAAATTTTCAATTCGGGTAACGAAGAATCGACTCTCGCCGGGTAAACAATTCTTAGTCATGACTACAGCTAGTTCTTCTGCTTC
GTGAATGCTGGTCGCTATACTGGATCTAGTATACAGTTATCCAATAGCTATGTACTCAAGTACCGTGTATACACTATAAAATCTCATCTCATCGCTAAAGCTAATATTGAAAAAAAAAAAAAAAAAAAAAAGAAAAAGCAAATAAAAAATTTTCAATTCGGGTAACGAAGAATCGACTCTCGCCGGGTAAACAATTCTTAGTCGATGACTACAGCTAGTTCTTCTGCTTC
GTGAATGCTGGTCGCTATACTGGATCAGTATACAGTTATCCAATAGCTATGTACTCAAGTACCGTGTATACACTATAAAATCTCATCTCATCGCTAAAGCTAATATTGAAAAAAAAAAAAAAAAAAAAAAGAAAAAGCAAATAAAAAATTTTCAATTCGGGTAACGAAGAATCGACTCTCGCCGGGTAAACAATTCTTAGTCGTATGACTACAGCTAGTTCTTCTGCTTC
GTGAATGCTGGTCGCTATACTGGATCGTATACAGTTATCCAATAGCTATGTACTCAAGTACCGTGTATACACTATAAAATCTCATCTCATCGCTAAAGCTAATATTGAAAAAAAAAAAAAAAAAAAAAAGAAAAAGCAAATAAAAAATTTTCAATTCGGGTAACGAAGAATCGACTCTCGCCGGGTAAACAATTCTTAGTCGTCATGACTACAGCTAGTTCTTCTGCTTC
GTGAATGCTGGTCGCTATACTGGATCTATACAGTTATCCAATAGCTATGTACTCAAGTACCGTGTATACACTATAAAATCTCATCTCATCGCTAAAGCTAATATTGAAAAAAAAAAAAAAAAAAAAAAGAAAAAGCAAATAAAAAATTTTCAATTCGGGTAACGAAGAATCGACTCTCGCCGGGTAAACAATTCTTAGTCGTCAATGACTACAGCTAGTTCTTCTGCTTC
GTGAATGCTGGTCGCTATACTGGATCATACAGTTATCCAATAGCTATGTACTCAAGTACCGTGTATACACTATAAAATCTCATCTCATCGCTAAAGCTAATATTGAAAAAAAAAAAAAAAAAAAAAAGAAAAAGCAAATAAAAAATTTTCAATTCGGGTAACGAAGAATCGACTCTCGCCGGGTAAACAATTCTTAGTCGTCATATGACTACAGCTAGTTCTTCTGCTTC
GTGAATGCTGGTCGCTATACTGGATCTACAGTTATCCAATAGCTATGTACTCAAGTACCGTGTATACACTATAAAATCTCATCTCATCGCTAAAGCTAATATTGAAAAAAAAAAAAAAAAAAAAAAGAAAAAGCAAATAAAAAATTTTCAATTCGGGTAACGAAGAATCGACTCTCGCCGGGTAAACAATTCTTAGTCGTCATAATGACTACAGCTAGTTCTTCTGCTTC
GTGAATGCTGGTCGCTATACTGGATCACAGTTATCCAATAGCTATGTACTCAAGTACCGTGTATACACTATAAAATCTCATCTCATCGCTAAAGCTAATATTGAAAAAAAAAAAAAAAAAAAAAAGAAAAAGCAAATAAAAAATTTTCAATTCGGGTAACGAAGAATCGACTCTCGCCGGGTAAACAATTCTTAGTCGTCATACATGACTACAGCTAGTTCTTCTGCTTC
GTGAATGCTGGTCGCTATACTGGATCCAGTTATCCAATAGCTATGTACTCAAGTACCGTGTATACACTATAAAATCTCATCTCATCGCTAAAGCTAATATTGAAAAAAAAAAAAAAAAAAAAAAGAAAAAGCAAATAAAAAATTTTCAATTCGGGTAACGAAGAATCGACTCTCGCCGGGTAAACAATTCTTAGTCGTCATACAATGACTACAGCTAGTTCTTCTGCTTC
GTGAATGCTGGTCGCTATACTGGATCAGTTATCCAATAGCTATGTACTCAAGTACCGTGTATACACTATAAAATCTCATCTCATCGCTAAAGCTAATATTGAAAAAAAAAAAAAAAAAAAAAAGAAAAAGCAAATAAAAAATTTTCAATTCGGGTAACGAAGAATCGACTCTCGCCGGGTAAACAATTCTTAGTCGTCATACACATGACTACAGCTAGTTCTTCTGCTTC
GTGAATGCTGGTCGCTATACTGGATCGTTATCCAATAGCTATGTACTCAAGTACCGTGTATACACTATAAAATCTCATCTCATCGCTAAAGCTAATATTGAAAAAAAAAAAAAAAAAAAAAAGAAAAAGCAAATAAAAAATTTTCAATTCGGGTAACGAAGAATCGACTCTCGCCGGGTAAACAATTCTTAGTCGTCATACACTATGACTACAGCTAGTTCTTCTGCTTC
GTGAATGCTGGTCGCTATACTGGATCTTATCCAATAGCTATGTACTCAAGTACCGTGTATACACTATAAAATCTCATCTCATCGCTAAAGCTAATATTGAAAAAAAAAAAAAAAAAAAAAAGAAAAAGCAAATAAAAAATTTTCAATTCGGGTAACGAAGAATCGACTCTCGCCGGGTAAACAATTCTTAGTCGTCATACACTCATGACTACAGCTAGTTCTTCTGCTTC
GTGAATGCTGGTCGCTATACTGGATCTATCCAATAGCTATGTACTCAAGTACCGTGTATACACTATAAAATCTCATCTCATCGCTAAAGCTAATATTGAAAAAAAAAAAAAAAAAAAAAAGAAAAAGCAAATAAAAAATTTTCAATTCGGGTAACGAAGAATCGACTCTCGCCGGGTAAACAATTCTTAGTCGTCATACACTCCATGACTACAGCTAGTTCTTCTGCTTC
GTGAATGCTGGTCGCTATACTGGATCATCCAATAGCTATGTACTCAAGTACCGTGTATACACTATAAAATCTCATCTCATCGCTAAAGCTAATATTGAAAAAAAAAAAAAAAAAAAAAAGAAAAAGCAAATAAAAAATTTTCAATTCGGGTAACGAAGAATCGACTCTCGCCGGGTAAACAATTCTTAGTCGTCATACACTCCTATGACTACAGCTAGTTCTTCTGCTTC
GTGAATGCTGGTCGCTATACTGGATCTCCAATAGCTATGTACTCAAGTACCGTGTATACACTATAAAATCTCATCTCATCGCTAAAGCTAATATTGAAAAAAAAAAAAAAAAAAAAAAGAAAAAGCAAATAAAAAATTTTCAATTCGGGTAACGAAGAATCGACTCTCGCCGGGTAAACAATTCTTAGTCGTCATACACTCCTCATGACTACAGCTAGTTCTTCTGCTTC
GTGAATGCTGGTCGCTATACTGGATCCCAATAGCTATGTACTCAAGTACCGTGTATACACTATAAAATCTCATCTCATCGCTAAAGCTAATATTGAAAAAAAAAAAAAAAAAAAAAAGAAAAAGCAAATAAAAAATTTTCAATTCGGGTAACGAAGAATCGACTCTCGCCGGGTAAACAATTCTTAGTCGTCATACACTCCTCTATGACTACAGCTAGTTCTTCTGCTTC
GTGAATGCTGGTCGCTATACTGGATCCAATAGCTATGTACTCAAGTACCGTGTATACACTATAAAATCTCATCTCATCGCTAAAGCTAATATTGAAAAAAAAAAAAAAAAAAAAAAGAAAAAGCAAATAAAAAATTTTCAATTCGGGTAACGAAGAATCGACTCTCGCCGGGTAAACAATTCTTAGTCGTCATACACTCCTCTTATGACTACAGCTAGTTCTTCTGCTTC
GTGAATGCTGGTCGCTATACTGGATCAATAGCTATGTACTCAAGTACCGTGTATACACTATAAAATCTCATCTCATCGCTAAAGCTAATATTGAAAAAAAAAAAAAAAAAAAAAAGAAAAAGCAAATAAAAAATTTTCAATTCGGGTAACGAAGAATCGACTCTCGCCGGGTAAACAATTCTTAGTCGTCATACACTCCTCTTTATGACTACAGCTAGTTCTTCTGCTTC
GTGAATGCTGGTCGCTATACTGGATCATAGCTATGTACTCAAGTACCGTGTATACACTATAAAATCTCATCTCATCGCTAAAGCTAATATTGAAAAAAAAAAAAAAAAAAAAAAGAAAAAGCAAATAAAAAATTTTCAATTCGGGTAACGAAGAATCGACTCTCGCCGGGTAAACAATTCTTAGTCGTCATACACTCCTCTTTAATGACTACAGCTAGTTCTTCTGCTTC
GTGAATGCTGGTCGCTATACTGGATCTAGCTATGTACTCAAGTACCGTGTATACACTATAAAATCTCATCTCATCGCTAAAGCTAATATTGAAAAAAAAAAAAAAAAAAAAAAGAAAAAGCAAATAAAAAATTTTCAATTCGGGTAACGAAGAATCGACTCTCGCCGGGTAAACAATTCTTAGTCGTCATACACTCCTCTTTACATGACTACAGCTAGTTCTTCTGCTTC
GTGAATGCTGGTCGCTATACTGGATCAGCTATGTACTCAAGTACCGTGTATACACTATAAAATCTCATCTCATCGCTAAAGCTAATATTGAAAAAAAAAAAAAAAAAAAAAAGAAAAAGCAAATAAAAAATTTTCAATTCGGGTAACGAAGAATCGACTCTCGCCGGGTAAACAATTCTTAGTCGTCATACACTCCTCTTTACGATGACTACAGCTAGTTCTTCTGCTTC
GTGAATGCTGGTCGCTATACTGGATCGCTATGTACTCAAGTACCGTGTATACACTATAAAATCTCATCTCATCGCTAAAGCTAATATTGAAAAAAAAAAAAAAAAAAAAAAGAAAAAGCAAATAAAAAATTTTCAATTCGGGTAACGAAGAATCGACTCTCGCCGGGTAAACAATTCTTAGTCGTCATACACTCCTCTTTACGTATGACTACAGCTAGTTCTTCTGCTTC
GTGAATGCTGGTCGCTATACTGGATCCTATGTACTCAAGTACCGTGTATACACTATAAAATCTCATCTCATCGCTAAAGCTAATATTGAAAAAAAAAAAAAAAAAAAAAAGAAAAAGCAAATAAAAAATTTTCAATTCGGGTAACGAAGAATCGACTCTCGCCGGGTAAACAATTCTTAGTCGTCATACACTCCTCTTTACGTTATGACTACAGCTAGTTCTTCTGCTTC
GTGAATGCTGGTCGCTATACTGGATCTATGTACTCAAGTACCGTGTATACACTATAAAATCTCATCTCATCGCTAAAGCTAATATTGAAAAAAAAAAAAAAAAAAAAAAGAAAAAGCAAATAAAAAATTTTCAATTCGGGTAACGAAGAATCGACTCTCGCCGGGTAAACAATTCTTAGTCGTCATACACTCCTCTTTACGTTAATGACTACAGCTAGTTCTTCTGCTTC
GTGAATGCTGGTCGCTATACTGGATCATGTACTCAAGTACCGTGTATACACTATAAAATCTCATCTCATCGCTAAAGCTAATATTGAAAAAAAAAAAAAAAAAAAAAAGAAAAAGCAAATAAAAAATTTTCAATTCGGGTAACGAAGAATCGACTCTCGCCGGGTAAACAATTCTTAGTCGTCATACACTCCTCTTTACGTTAAATGACTACAGCTAGTTCTTCTGCTTC
GTGAATGCTGGTCGCTATACTGGATCTGTACTCAAGTACCGTGTATACACTATAAAATCTCATCTCATCGCTAAAGCTAATATTGAAAAAAAAAAAAAAAAAAAAAAGAAAAAGCAAATAAAAAATTTTCAATTCGGGTAACGAAGAATCGACTCTCGCCGGGTAAACAATTCTTAGTCGTCATACACTCCTCTTTACGTTAAGATGACTACAGCTAGTTCTTCTGCTTC
GTGAATGCTGGTCGCTATACTGGATCGTACTCAAGTACCGTGTATACACTATAAAATCTCATCTCATCGCTAAAGCTAATATTGAAAAAAAAAAAAAAAAAAAAAAGAAAAAGCAAATAAAAAATTTTCAATTCGGGTAACGAAGAATCGACTCTCGCCGGGTAAACAATTCTTAGTCGTCATACACTCCTCTTTACGTTAAGAATGACTACAGCTAGTTCTTCTGCTTC
GTGAATGCTGGTCGCTATACTGGATCTACTCAAGTACCGTGTATACACTATAAAATCTCATCTCATCGCTAAAGCTAATATTGAAAAAAAAAAAAAAAAAAAAAAGAAAAAGCAAATAAAAAATTTTCAATTCGGGTAACGAAGAATCGACTCTCGCCGGGTAAACAATTCTTAGTCGTCATACACTCCTCTTTACGTTAAGAAATGACTACAGCTAGTTCTTCTGCTTC
GTGAATGCTGGTCGCTATACTGGATCACTCAAGTACCGTGTATACACTATAAAATCTCATCTCATCGCTAAAGCTAATATTGAAAAAAAAAAAAAAAAAAAAAAGAAAAAGCAAATAAAAAATTTTCAATTCGGGTAACGAAGAATCGACTCTCGCCGGGTAAACAATTCTTAGTCGTCATACACTCCTCTTTACGTTAAGAAAATGACTACAGCTAGTTCTTCTGCTTC
GTGAATGCTGGTCGCTATACTGGATCCTCAAGTACCGTGTATACACTATAAAATCTCATCTCATCGCTAAAGCTAATATTGAAAAAAAAAAAAAAAAAAAAAAGAAAAAGCAAATAAAAAATTTTCAATTCGGGTAACGAAGAATCGACTCTCGCCGGGTAAACAATTCTTAGTCGTCATACACTCCTCTTTACGTTAAGAAAAATGACTACAGCTAGTTCTTCTGCTTC
GTGAATGCTGGTCGCTATACTGGATCTCAAGTACCGTGTATACACTATAAAATCTCATCTCATCGCTAAAGCTAATATTGAAAAAAAAAAAAAAAAAAAAAAGAAAAAGCAAATAAAAAATTTTCAATTCGGGTAACGAAGAATCGACTCTCGCCGGGTAAACAATTCTTAGTCGTCATACACTCCTCTTTACGTTAAGAAAATATGACTACAGCTAGTTCTTCTGCTTC
GTGAATGCTGGTCGCTATACTGGATCCAAGTACCGTGTATACACTATAAAATCTCATCTCATCGCTAAAGCTAATATTGAAAAAAAAAAAAAAAAAAAAAAGAAAAAGCAAATAAAAAATTTTCAATTCGGGTAACGAAGAATCGACTCTCGCCGGGTAAACAATTCTTAGTCGTCATACACTCCTCTTTACGTTAAGAAAATAATGACTACAGCTAGTTCTTCTGCTTC
GTGAATGCTGGTCGCTATACTGGATCAAGTACCGTGTATACACTATAAAATCTCATCTCATCGCTAAAGCTAATATTGAAAAAAAAAAAAAAAAAAAAAAGAAAAAGCAAATAAAAAATTTTCAATTCGGGTAACGAAGAATCGACTCTCGCCGGGTAAACAATTCTTAGTCGTCATACACTCCTCTTTACGTTAAGAAAATAGATGACTACAGCTAGTTCTTCTGCTTC
GTGAATGCTGGTCGCTATACTGGATCAGTACCGTGTATACACTATAAAATCTCATCTCATCGCTAAAGCTAATATTGAAAAAAAAAAAAAAAAAAAAAAGAAAAAGCAAATAAAAAATTTTCAATTCGGGTAACGAAGAATCGACTCTCGCCGGGTAAACAATTCTTAGTCGTCATACACTCCTCTTTACGTTAAGAAAATAGAATGACTACAGCTAGTTCTTCTGCTTC
GTGAATGCTGGTCGCTATACTGGATCGTACCGTGTATACACTATAAAATCTCATCTCATCGCTAAAGCTAATATTGAAAAAAAAAAAAAAAAAAAAAAGAAAAAGCAAATAAAAAATTTTCAATTCGGGTAACGAAGAATCGACTCTCGCCGGGTAAACAATTCTTAGTCGTCATACACTCCTCTTTACGTTAAGAAAATAGAAATGACTACAGCTAGTTCTTCTGCTTC
GTGAATGCTGGTCGCTATACTGGATCTACCGTGTATACACTATAAAATCTCATCTCATCGCTAAAGCTAATATTGAAAAAAAAAAAAAAAAAAAAAAGAAAAAGCAAATAAAAAATTTTCAATTCGGGTAACGAAGAATCGACTCTCGCCGGGTAAACAATTCTTAGTCGTCATACACTCCTCTTTACGTTAAGAAAATAGAAGATGACTACAGCTAGTTCTTCTGCTTC
GTGAATGCTGGTCGCTATACTGGATCACCGTGTATACACTATAAAATCTCATCTCATCGCTAAAGCTAATATTGAAAAAAAAAAAAAAAAAAAAAAGAAAAAGCAAATAAAAAATTTTCAATTCGGGTAACGAAGAATCGACTCTCGCCGGGTAAACAATTCTTAGTCGTCATACACTCCTCTTTACGTTAAGAAAATAGAAGTATGACTACAGCTAGTTCTTCTGCTTC
GTGAATGCTGGTCGCTATACTGGATCCCGTGTATACACTATAAAATCTCATCTCATCGCTAAAGCTAATATTGAAAAAAAAAAAAAAAAAAAAAAGAAAAAGCAAATAAAAAATTTTCAATTCGGGTAACGAAGAATCGACTCTCGCCGGGTAAACAATTCTTAGTCGTCATACACTCCTCTTTACGTTAAGAAAATAGAAGTAATGACTACAGCTAGTTCTTCTGCTTC
GTGAATGCTGGTCGCTATACTGGATCCGTGTATACACTATAAAATCTCATCTCATCGCTAAAGCTAATATTGAAAAAAAAAAAAAAAAAAAAAAGAAAAAGCAAATAAAAAATTTTCAATTCGGGTAACGAAGAATCGACTCTCGCCGGGTAAACAATTCTTAGTCGTCATACACTCCTCTTTACGTTAAGAAAATAGAAGTAGATGACTACAGCTAGTTCTTCTGCTTC
GTGAATGCTGGTCGCTATACTGGATCGTGTATACACTATAAAATCTCATCTCATCGCTAAAGCTAATATTGAAAAAAAAAAAAAAAAAAAAAAGAAAAAGCAAATAAAAAATTTTCAATTCGGGTAACGAAGAATCGACTCTCGCCGGGTAAACAATTCTTAGTCGTCATACACTCCTCTTTACGTTAAGAAAATAGAAGTAGCATGACTACAGCTAGTTCTTCTGCTTC
GTGAATGCTGGTCGCTATACTGGATCTGTATACACTATAAAATCTCATCTCATCGCTAAAGCTAATATTGAAAAAAAAAAAAAAAAAAAAAAGAAAAAGCAAATAAAAAATTTTCAATTCGGGTAACGAAGAATCGACTCTCGCCGGGTAAACAATTCTTAGTCGTCATACACTCCTCTTTACGTTAAGAAAATAGAAGTAGCAATGACTACAGCTAGTTCTTCTGCTTC
GTGAATGCTGGTCGCTATACTGGATCGTATACACTATAAAATCTCATCTCATCGCTAAAGCTAATATTGAAAAAAAAAAAAAAAAAAAAAAGAAAAAGCAAATAAAAAATTTTCAATTCGGGTAACGAAGAATCGACTCTCGCCGGGTAAACAATTCTTAGTCGTCATACACTCCTCTTTACGTTAAGAAAATAGAAGTAGCAGATGACTACAGCTAGTTCTTCTGCTTC
GTGAATGCTGGTCGCTATACTGGATCTATACACTATAAAATCTCATCTCATCGCTAAAGCTAATATTGAAAAAAAAAAAAAAAAAAAAAAGAAAAAGCAAATAAAAAATTTTCAATTCGGGTAACGAAGAATCGACTCTCGCCGGGTAAACAATTCTTAGTCGTCATACACTCCTCTTTACGTTAAGAAAATAGAAGTAGCAGCATGACTACAGCTAGTTCTTCTGCTTC
GTGAATGCTGGTCGCTATACTGGATCATACACTATAAAATCTCATCTCATCGCTAAAGCTAATATTGAAAAAAAAAAAAAAAAAAAAAAGAAAAAGCAAATAAAAAATTTTCAATTCGGGTAACGAAGAATCGACTCTCGCCGGGTAAACAATTCTTAGTCGTCATACACTCCTCTTTACGTTAAGAAAATAGAAGTAGCAGCGATGACTACAGCTAGTTCTTCTGCTTC
GTGAATGCTGGTCGCTATACTGGATCTACACTATAAAATCTCATCTCATCGCTAAAGCTAATATTGAAAAAAAAAAAAAAAAAAAAAAGAAAAAGCAAATAAAAAATTTTCAATTCGGGTAACGAAGAATCGACTCTCGCCGGGTAAACAATTCTTAGTCGTCATACACTCCTCTTTACGTTAAGAAAATAGAAGTAGCAGCGCATGACTACAGCTAGTTCTTCTGCTTC
GTGAATGCTGGTCGCTATACTGGATCACACTATAAAATCTCATCTCATCGCTAAAGCTAATATTGAAAAAAAAAAAAAAAAAAAAAAGAAAAAGCAAATAAAAAATTTTCAATTCGGGTAACGAAGAATCGACTCTCGCCGGGTAAACAATTCTTAGTCGTCATACACTCCTCTTTACGTTAAGAAAATAGAAGTAGCAGCGCTATGACTACAGCTAGTTCTTCTGCTTC
GTGAATGCTGGTCGCTATACTGGATCCACTATAAAATCTCATCTCATCGCTAAAGCTAATATTGAAAAAAAAAAAAAAAAAAAAAAGAAAAAGCAAATAAAAAATTTTCAATTCGGGTAACGAAGAATCGACTCTCGCCGGGTAAACAATTCTTAGTCGTCATACACTCCTCTTTACGTTAAGAAAATAGAAGTAGCAGCGCTTATGACTACAGCTAGTTCTTCTGCTTC
GTGAATGCTGGTCGCTATACTGGATCACTATAAAATCTCATCTCATCGCTAAAGCTAATATTGAAAAAAAAAAAAAAAAAAAAAAGAAAAAGCAAATAAAAAATTTTCAATTCGGGTAACGAAGAATCGACTCTCGCCGGGTAAACAATTCTTAGTCGTCATACACTCCTCTTTACGTTAAGAAAATAGAAGTAGCAGCGCTTTATGACTACAGCTAGTTCTTCTGCTTC
GTGAATGCTGGTCGCTATACTGGATCCTATAAAATCTCATCTCATCGCTAAAGCTAATATTGAAAAAAAAAAAAAAAAAAAAAAGAAAAAGCAAATAAAAAATTTTCAATTCGGGTAACGAAGAATCGACTCTCGCCGGGTAAACAATTCTTAGTCGTCATACACTCCTCTTTACGTTAAGAAAATAGAAGTAGCAGCGCTTTGATGACTACAGCTAGTTCTTCTGCTTC
GTGAATGCTGGTCGCTATACTGGATCTATAAAATCTCATCTCATCGCTAAAGCTAATATTGAAAAAAAAAAAAAAAAAAAAAAGAAAAAGCAAATAAAAAATTTTCAATTCGGGTAACGAAGAATCGACTCTCGCCGGGTAAACAATTCTTAGTCGTCATACACTCCTCTTTACGTTAAGAAAATAGAAGTAGCAGCGCTTTGTATGACTACAGCTAGTTCTTCTGCTTC
GTGAATGCTGGTCGCTATACTGGATCATAAAATCTCATCTCATCGCTAAAGCTAATATTGAAAAAAAAAAAAAAAAAAAAAAGAAAAAGCAAATAAAAAATTTTCAATTCGGGTAACGAAGAATCGACTCTCGCCGGGTAAACAATTCTTAGTCGTCATACACTCCTCTTTACGTTAAGAAAATAGAAGTAGCAGCGCTTTGTAATGACTACAGCTAGTTCTTCTGCTTC
GTGAATGCTGGTCGCTATACTGGATCTAAAATCTCATCTCATCGCTAAAGCTAATATTGAAAAAAAAAAAAAAAAAAAAAAGAAAAAGCAAATAAAAAATTTTCAATTCGGGTAACGAAGAATCGACTCTCGCCGGGTAAACAATTCTTAGTCGTCATACACTCCTCTTTACGTTAAGAAAATAGAAGTAGCAGCGCTTTGTAAATGACTACAGCTAGTTCTTCTGCTTC
GTGAATGCTGGTCGCTATACTGGATCAAAATCTCATCTCATCGCTAAAGCTAATATTGAAAAAAAAAAAAAAAAAAAAAAGAAAAAGCAAATAAAAAATTTTCAATTCGGGTAACGAAGAATCGACTCTCGCCGGGTAAACAATTCTTAGTCGTCATACACTCCTCTTTACGTTAAGAAAATAGAAGTAGCAGCGCTTTGTAAAATGACTACAGCTAGTTCTTCTGCTTC
GTGAATGCTGGTCGCTATACTGGATCAAATCTCATCTCATCGCTAAAGCTAATATTGAAAAAAAAAAAAAAAAAAAAAAGAAAAAGCAAATAAAAAATTTTCAATTCGGGTAACGAAGAATCGACTCTCGCCGGGTAAACAATTCTTAGTCGTCATACACTCCTCTTTACGTTAAGAAAATAGAAGTAGCAGCGCTTTGTAAAGATGACTACAGCTAGTTCTTCTGCTTC
GTGAATGCTGGTCGCTATACTGGATCAATCTCATCTCATCGCTAAAGCTAATATTGAAAAAAAAAAAAAAAAAAAAAAGAAAAAGCAAATAAAAAATTTTCAATTCGGGTAACGAAGAATCGACTCTCGCCGGGTAAACAATTCTTAGTCGTCATACACTCCTCTTTACGTTAAGAAAATAGAAGTAGCAGCGCTTTGTAAAGCATGACTACAGCTAGTTCTTCTGCTTC
GTGAATGCTGGTCGCTATACTGGATCATCTCATCTCATCGCTAAAGCTAATATTGAAAAAAAAAAAAAAAAAAAAAAGAAAAAGCAAATAAAAAATTTTCAATTCGGGTAACGAAGAATCGACTCTCGCCGGGTAAACAATTCTTAGTCGTCATACACTCCTCTTTACGTTAAGAAAATAGAAGTAGCAGCGCTTTGTAAAGCAATGACTACAGCTAGTTCTTCTGCTTC
GTGAATGCTGGTCGCTATACTGGATCTCTCATCTCATCGCTAAAGCTAATATTGAAAAAAAAAAAAAAAAAAAAAAGAAAAAGCAAATAAAAAATTTTCAATTCGGGTAACGAAGAATCGACTCTCGCCGGGTAAACAATTCTTAGTCGTCATACACTCCTCTTTACGTTAAGAAAATAGAAGTAGCAGCGCTTTGTAAAGCATATGACTACAGCTAGTTCTTCTGCTTC
GTGAATGCTGGTCGCTATACTGGATCCTCATCTCATCGCTAAAGCTAATATTGAAAAAAAAAAAAAAAAAAAAAAGAAAAAGCAAATAAAAAATTTTCAATTCGGGTAACGAAGAATCGACTCTCGCCGGGTAAACAATTCTTAGTCGTCATACACTCCTCTTTACGTTAAGAAAATAGAAGTAGCAGCGCTTTGTAAAGCATTATGACTACAGCTAGTTCTTCTGCTTC
GTGAATGCTGGTCGCTATACTGGATCTCATCTCATCGCTAAAGCTAATATTGAAAAAAAAAAAAAAAAAAAAAAGAAAAAGCAAATAAAAAATTTTCAATTCGGGTAACGAAGAATCGACTCTCGCCGGGTAAACAATTCTTAGTCGTCATACACTCCTCTTTACGTTAAGAAAATAGAAGTAGCAGCGCTTTGTAAAGCATTAATGACTACAGCTAGTTCTTCTGCTTC
GTGAATGCTGGTCGCTATACTGGATCCATCTCATCGCTAAAGCTAATATTGAAAAAAAAAAAAAAAAAAAAAAGAAAAAGCAAATAAAAAATTTTCAATTCGGGTAACGAAGAATCGACTCTCGCCGGGTAAACAATTCTTAGTCGTCATACACTCCTCTTTACGTTAAGAAAATAGAAGTAGCAGCGCTTTGTAAAGCATTAAATGACTACAGCTAGTTCTTCTGCTTC
GTGAATGCTGGTCGCTATACTGGATCATCTCATCGCTAAAGCTAATATTGAAAAAAAAAAAAAAAAAAAAAAGAAAAAGCAAATAAAAAATTTTCAATTCGGGTAACGAAGAATCGACTCTCGCCGGGTAAACAATTCTTAGTCGTCATACACTCCTCTTTACGTTAAGAAAATAGAAGTAGCAGCGCTTTGTAAAGCATTAAAATGACTACAGCTAGTTCTTCTGCTTC
GTGAATGCTGGTCGCTATACTGGATCTCTCATCGCTAAAGCTAATATTGAAAAAAAAAAAAAAAAAAAAAAGAAAAAGCAAATAAAAAATTTTCAATTCGGGTAACGAAGAATCGACTCTCGCCGGGTAAACAATTCTTAGTCGTCATACACTCCTCTTTACGTTAAGAAAATAGAAGTAGCAGCGCTTTGTAAAGCATTAAAGATGACTACAGCTAGTTCTTCTGCTTC
GTGAATGCTGGTCGCTATACTGGATCCTCATCGCTAAAGCTAATATTGAAAAAAAAAAAAAAAAAAAAAAGAAAAAGCAAATAAAAAATTTTCAATTCGGGTAACGAAGAATCGACTCTCGCCGGGTAAACAATTCTTAGTCGTCATACACTCCTCTTTACGTTAAGAAAATAGAAGTAGCAGCGCTTTGTAAAGCATTAAAGCATGACTACAGCTAGTTCTTCTGCTTC
GTGAATGCTGGTCGCTATACTGGATCTCATCGCTAAAGCTAATATTGAAAAAAAAAAAAAAAAAAAAAAGAAAAAGCAAATAAAAAATTTTCAATTCGGGTAACGAAGAATCGACTCTCGCCGGGTAAACAATTCTTAGTCGTCATACACTCCTCTTTACGTTAAGAAAATAGAAGTAGCAGCGCTTTGTAAAGCATTAAAGCGATGACTACAGCTAGTTCTTCTGCTTC
GTGAATGCTGGTCGCTATACTGGATCCATCGCTAAAGCTAATATTGAAAAAAAAAAAAAAAAAAAAAAGAAAAAGCAAATAAAAAATTTTCAATTCGGGTAACGAAGAATCGACTCTCGCCGGGTAAACAATTCTTAGTCGTCATACACTCCTCTTTACGTTAAGAAAATAGAAGTAGCAGCGCTTTGTAAAGCATTAAAGCGTATGACTACAGCTAGTTCTTCTGCTTC
GTGAATGCTGGTCGCTATACTGGATCATCGCTAAAGCTAATATTGAAAAAAAAAAAAAAAAAAAAAAGAAAAAGCAAATAAAAAATTTTCAATTCGGGTAACGAAGAATCGACTCTCGCCGGGTAAACAATTCTTAGTCGTCATACACTCCTCTTTACGTTAAGAAAATAGAAGTAGCAGCGCTTTGTAAAGCATTAAAGCGTCATGACTACAGCTAGTTCTTCTGCTTC
GTGAATGCTGGTCGCTATACTGGATCTCGCTAAAGCTAATATTGAAAAAAAAAAAAAAAAAAAAAAGAAAAAGCAAATAAAAAATTTTCAATTCGGGTAACGAAGAATCGACTCTCGCCGGGTAAACAATTCTTAGTCGTCATACACTCCTCTTTACGTTAAGAAAATAGAAGTAGCAGCGCTTTGTAAAGCATTAAAGCGTCAATGACTACAGCTAGTTCTTCTGCTTC
GTGAATGCTGGTCGCTATACTGGATCCGCTAAAGCTAATATTGAAAAAAAAAAAAAAAAAAAAAAGAAAAAGCAAATAAAAAATTTTCAATTCGGGTAACGAAGAATCGACTCTCGCCGGGTAAACAATTCTTAGTCGTCATACACTCCTCTTTACGTTAAGAAAATAGAAGTAGCAGCGCTTTGTAAAGCATTAAAGCGTCATATGACTACAGCTAGTTCTTCTGCTTC
GTGAATGCTGGTCGCTATACTGGATCGCTAAAGCTAATATTGAAAAAAAAAAAAAAAAAAAAAAGAAAAAGCAAATAAAAAATTTTCAATTCGGGTAACGAAGAATCGACTCTCGCCGGGTAAACAATTCTTAGTCGTCATACACTCCTCTTTACGTTAAGAAAATAGAAGTAGCAGCGCTTTGTAAAGCATTAAAGCGTCATGATGACTACAGCTAGTTCTTCTGCTTC
GTGAATGCTGGTCGCTATACTGGATCCTAAAGCTAATATTGAAAAAAAAAAAAAAAAAAAAAAGAAAAAGCAAATAAAAAATTTTCAATTCGGGTAACGAAGAATCGACTCTCGCCGGGTAAACAATTCTTAGTCGTCATACACTCCTCTTTACGTTAAGAAAATAGAAGTAGCAGCGCTTTGTAAAGCATTAAAGCGTCATGGATGACTACAGCTAGTTCTTCTGCTTC
GTGAATGCTGGTCGCTATACTGGATCTAAAGCTAATATTGAAAAAAAAAAAAAAAAAAAAAAGAAAAAGCAAATAAAAAATTTTCAATTCGGGTAACGAAGAATCGACTCTCGCCGGGTAAACAATTCTTAGTCGTCATACACTCCTCTTTACGTTAAGAAAATAGAAGTAGCAGCGCTTTGTAAAGCATTAAAGCGTCATGGAATGACTACAGCTAGTTCTTCTGCTTC
GTGAATGCTGGTCGCTATACTGGATCAAAGCTAATATTGAAAAAAAAAAAAAAAAAAAAAAGAAAAAGCAAATAAAAAATTTTCAATTCGGGTAACGAAGAATCGACTCTCGCCGGGTAAACAATTCTTAGTCGTCATACACTCCTCTTTACGTTAAGAAAATAGAAGTAGCAGCGCTTTGTAAAGCATTAAAGCGTCATGGATATGACTACAGCTAGTTCTTCTGCTTC
GTGAATGCTGGTCGCTATACTGGATCAAGCTAATATTGAAAAAAAAAAAAAAAAAAAAAAGAAAAAGCAAATAAAAAATTTTCAATTCGGGTAACGAAGAATCGACTCTCGCCGGGTAAACAATTCTTAGTCGTCATACACTCCTCTTTACGTTAAGAAAATAGAAGTAGCAGCGCTTTGTAAAGCATTAAAGCGTCATGGATTATGACTACAGCTAGTTCTTCTGCTTC
GTGAATGCTGGTCGCTATACTGGATCAGCTAATATTGAAAAAAAAAAAAAAAAAAAAAAGAAAAAGCAAATAAAAAATTTTCAATTCGGGTAACGAAGAATCGACTCTCGCCGGGTAAACAATTCTTAGTCGTCATACACTCCTCTTTACGTTAAGAAAATAGAAGTAGCAGCGCTTTGTAAAGCATTAAAGCGTCATGGATTGATGACTACAGCTAGTTCTTCTGCTTC
GTGAATGCTGGTCGCTATACTGGATCGCTAATATTGAAAAAAAAAAAAAAAAAAAAAAGAAAAAGCAAATAAAAAATTTTCAATTCGGGTAACGAAGAATCGACTCTCGCCGGGTAAACAATTCTTAGTCGTCATACACTCCTCTTTACGTTAAGAAAATAGAAGTAGCAGCGCTTTGTAAAGCATTAAAGCGTCATGGATTGCATGACTACAGCTAGTTCTTCTGCTTC
GTGAATGCTGGTCGCTATACTGGATCCTAATATTGAAAAAAAAAAAAAAAAAAAAAAGAAAAAGCAAATAAAAAATTTTCAATTCGGGTAACGAAGAATCGACTCTCGCCGGGTAAACAATTCTTAGTCGTCATACACTCCTCTTTACGTTAAGAAAATAGAAGTAGCAGCGCTTTGTAAAGCATTAAAGCGTCATGGATTGCAATGACTACAGCTAGTTCTTCTGCTTC
GTGAATGCTGGTCGCTATACTGGATCTAATATTGAAAAAAAAAAAAAAAAAAAAAAGAAAAAGCAAATAAAAAATTTTCAATTCGGGTAACGAAGAATCGACTCTCGCCGGGTAAACAATTCTTAGTCGTCATACACTCCTCTTTACGTTAAGAAAATAGAAGTAGCAGCGCTTTGTAAAGCATTAAAGCGTCATGGATTGCAAATGACTACAGCTAGTTCTTCTGCTTC
GTGAATGCTGGTCGCTATACTGGATCAATATTGAAAAAAAAAAAAAAAAAAAAAAGAAAAAGCAAATAAAAAATTTTCAATTCGGGTAACGAAGAATCGACTCTCGCCGGGTAAACAATTCTTAGTCGTCATACACTCCTCTTTACGTTAAGAAAATAGAAGTAGCAGCGCTTTGTAAAGCATTAAAGCGTCATGGATTGCAAAATGACTACAGCTAGTTCTTCTGCTTC
GTGAATGCTGGTCGCTATACTGGATCATATTGAAAAAAAAAAAAAAAAAAAAAAGAAAAAGCAAATAAAAAATTTTCAATTCGGGTAACGAAGAATCGACTCTCGCCGGGTAAACAATTCTTAGTCGTCATACACTCCTCTTTACGTTAAGAAAATAGAAGTAGCAGCGCTTTGTAAAGCATTAAAGCGTCATGGATTGCAAAAATGACTACAGCTAGTTCTTCTGCTTC
GTGAATGCTGGTCGCTATACTGGATCTATTGAAAAAAAAAAAAAAAAAAAAAAGAAAAAGCAAATAAAAAATTTTCAATTCGGGTAACGAAGAATCGACTCTCGCCGGGTAAACAATTCTTAGTCGTCATACACTCCTCTTTACGTTAAGAAAATAGAAGTAGCAGCGCTTTGTAAAGCATTAAAGCGTCATGGATTGCAAAATATGACTACAGCTAGTTCTTCTGCTTC
GTGAATGCTGGTCGCTATACTGGATCATTGAAAAAAAAAAAAAAAAAAAAAAGAAAAAGCAAATAAAAAATTTTCAATTCGGGTAACGAAGAATCGACTCTCGCCGGGTAAACAATTCTTAGTCGTCATACACTCCTCTTTACGTTAAGAAAATAGAAGTAGCAGCGCTTTGTAAAGCATTAAAGCGTCATGGATTGCAAAATAATGACTACAGCTAGTTCTTCTGCTTC
GTGAATGCTGGTCGCTATACTGGATCTTGAAAAAAAAAAAAAAAAAAAAAAGAAAAAGCAAATAAAAAATTTTCAATTCGGGTAACGAAGAATCGACTCTCGCCGGGTAAACAATTCTTAGTCGTCATACACTCCTCTTTACGTTAAGAAAATAGAAGTAGCAGCGCTTTGTAAAGCATTAAAGCGTCATGGATTGCAAAATACATGACTACAGCTAGTTCTTCTGCTTC
GTGAATGCTGGTCGCTATACTGGATCTGAAAAAAAAAAAAAAAAAAAAAAGAAAAAGCAAATAAAAAATTTTCAATTCGGGTAACGAAGAATCGACTCTCGCCGGGTAAACAATTCTTAGTCGTCATACACTCCTCTTTACGTTAAGAAAATAGAAGTAGCAGCGCTTTGTAAAGCATTAAAGCGTCATGGATTGCAAAATACAATGACTACAGCTAGTTCTTCTGCTTC
GTGAATGCTGGTCGCTATACTGGATCGAAAAAAAAAAAAAAAAAAAAAAGAAAAAGCAAATAAAAAATTTTCAATTCGGGTAACGAAGAATCGACTCTCGCCGGGTAAACAATTCTTAGTCGTCATACACTCCTCTTTACGTTAAGAAAATAGAAGTAGCAGCGCTTTGTAAAGCATTAAAGCGTCATGGATTGCAAAATACACATGACTACAGCTAGTTCTTCTGCTTC
GTGAATGCTGGTCGCTATACTGGATCAAAAAAAAAAAAAAAAAAAAAAGAAAAAGCAAATAAAAAATTTTCAATTCGGGTAACGAAGAATCGACTCTCGCCGGGTAAACAATTCTTAGTCGTCATACACTCCTCTTTACGTTAAGAAAATAGAAGTAGCAGCGCTTTGTAAAGCATTAAAGCGTCATGGATTGCAAAATACACAATGACTACAGCTAGTTCTTCTGCTTC
GTGAATGCTGGTCGCTATACTGGATCAAAAAAAAAAAAAAAAAAAAAGAAAAAGCAAATAAAAAATTTTCAATTCGGGTAACGAAGAATCGACTCTCGCCGGGTAAACAATTCTTAGTCGTCATACACTCCTCTTTACGTTAAGAAAATAGAAGTAGCAGCGCTTTGTAAAGCATTAAAGCGTCATGGATTGCAAAATACACATATGACTACAGCTAGTTCTTCTGCTTC
GTGAATGCTGGTCGCTATACTGGATCAAAAAAAAAAAAAAAAAAAAGAAAAAGCAAATAAAAAATTTTCAATTCGGGTAACGAAGAATCGACTCTCGCCGGGTAAACAATTCTTAGTCGTCATACACTCCTCTTTACGTTAAGAAAATAGAAGTAGCAGCGCTTTGTAAAGCATTAAAGCGTCATGGATTGCAAAATACACATAATGACTACAGCTAGTTCTTCTGCTTC
GTGAATGCTGGTCGCTATACTGGATCAAAAAAAAAAAAAAAAAAAGAAAAAGCAAATAAAAAATTTTCAATTCGGGTAACGAAGAATCGACTCTCGCCGGGTAAACAATTCTTAGTCGTCATACACTCCTCTTTACGTTAAGAAAATAGAAGTAGCAGCGCTTTGTAAAGCATTAAAGCGTCATGGATTGCAAAATACACATAAATGACTACAGCTAGTTCTTCTGCTTC
GTGAATGCTGGTCGCTATACTGGATCAAAAAAAAAAAAAAAAAAGAAAAAGCAAATAAAAAATTTTCAATTCGGGTAACGAAGAATCGACTCTCGCCGGGTAAACAATTCTTAGTCGTCATACACTCCTCTTTACGTTAAGAAAATAGAAGTAGCAGCGCTTTGTAAAGCATTAAAGCGTCATGGATTGCAAAATACACATAATATGACTACAGCTAGTTCTTCTGCTTC
GTGAATGCTGGTCGCTATACTGGATCAAAAAAAAAAAAAAAAAGAAAAAGCAAATAAAAAATTTTCAATTCGGGTAACGAAGAATCGACTCTCGCCGGGTAAACAATTCTTAGTCGTCATACACTCCTCTTTACGTTAAGAAAATAGAAGTAGCAGCGCTTTGTAAAGCATTAAAGCGTCATGGATTGCAAAATACACATAATAATGACTACAGCTAGTTCTTCTGCTTC
GTGAATGCTGGTCGCTATACTGGATCAAAAAAAAAAAAAAAAGAAAAAGCAAATAAAAAATTTTCAATTCGGGTAACGAAGAATCGACTCTCGCCGGGTAAACAATTCTTAGTCGTCATACACTCCTCTTTACGTTAAGAAAATAGAAGTAGCAGCGCTTTGTAAAGCATTAAAGCGTCATGGATTGCAAAATACACATAATATATGACTACAGCTAGTTCTTCTGCTTC
GTGAATGCTGGTCGCTATACTGGATCAAAAAAAAAAAAAAAGAAAAAGCAAATAAAAAATTTTCAATTCGGGTAACGAAGAATCGACTCTCGCCGGGTAAACAATTCTTAGTCGTCATACACTCCTCTTTACGTTAAGAAAATAGAAGTAGCAGCGCTTTGTAAAGCATTAAAGCGTCATGGATTGCAAAATACACATAATATAATGACTACAGCTAGTTCTTCTGCTTC
GTGAATGCTGGTCGCTATACTGGATCAAAAAAAAAAAAAAGAAAAAGCAAATAAAAAATTTTCAATTCGGGTAACGAAGAATCGACTCTCGCCGGGTAAACAATTCTTAGTCGTCATACACTCCTCTTTACGTTAAGAAAATAGAAGTAGCAGCGCTTTGTAAAGCATTAAAGCGTCATGGATTGCAAAATACACATAATATATATGACTACAGCTAGTTCTTCTGCTTC
GTGAATGCTGGTCGCTATACTGGATCAAAAAAAAAAAAAGAAAAAGCAAATAAAAAATTTTCAATTCGGGTAACGAAGAATCGACTCTCGCCGGGTAAACAATTCTTAGTCGTCATACACTCCTCTTTACGTTAAGAAAATAGAAGTAGCAGCGCTTTGTAAAGCATTAAAGCGTCATGGATTGCAAAATACACATAATATATCATGACTACAGCTAGTTCTTCTGCTTC
GTGAATGCTGGTCGCTATACTGGATCAAAAAAAAAAAAGAAAAAGCAAATAAAAAATTTTCAATTCGGGTAACGAAGAATCGACTCTCGCCGGGTAAACAATTCTTAGTCGTCATACACTCCTCTTTACGTTAAGAAAATAGAAGTAGCAGCGCTTTGTAAAGCATTAAAGCGTCATGGATTGCAAAATACACATAATATATCAATGACTACAGCTAGTTCTTCTGCTTC
GTGAATGCTGGTCGCTATACTGGATCAAAAAAAAAAAGAAAAAGCAAATAAAAAATTTTCAATTCGGGTAACGAAGAATCGACTCTCGCCGGGTAAACAATTCTTAGTCGTCATACACTCCTCTTTACGTTAAGAAAATAGAAGTAGCAGCGCTTTGTAAAGCATTAAAGCGTCATGGATTGCAAAATACACATAATATATCACATGACTACAGCTAGTTCTTCTGCTTC
GTGAATGCTGGTCGCTATACTGGATCAAAAAAAAAAGAAAAAGCAAATAAAAAATTTTCAATTCGGGTAACGAAGAATCGACTCTCGCCGGGTAAACAATTCTTAGTCGTCATACACTCCTCTTTACGTTAAGAAAATAGAAGTAGCAGCGCTTTGTAAAGCATTAAAGCGTCATGGATTGCAAAATACACATAATATATCACTATGACTACAGCTAGTTCTTCTGCTTC
GTGAATGCTGGTCGCTATACTGGATCAAAAAAAAAGAAAAAGCAAATAAAAAATTTTCAATTCGGGTAACGAAGAATCGACTCTCGCCGGGTAAACAATTCTTAGTCGTCATACACTCCTCTTTACGTTAAGAAAATAGAAGTAGCAGCGCTTTGTAAAGCATTAAAGCGTCATGGATTGCAAAATACACATAATATATCACTTATGACTACAGCTAGTTCTTCTGCTTC
GTGAATGCTGGTCGCTATACTGGATCAAAAAAAAGAAAAAGCAAATAAAAAATTTTCAATTCGGGTAACGAAGAATCGACTCTCGCCGGGTAAACAATTCTTAGTCGTCATACACTCCTCTTTACGTTAAGAAAATAGAAGTAGCAGCGCTTTGTAAAGCATTAAAGCGTCATGGATTGCAAAATACACATAATATATCACTTGATGACTACAGCTAGTTCTTCTGCTTC
GTGAATGCTGGTCGCTATACTGGATCAAAAAAAGAAAAAGCAAATAAAAAATTTTCAATTCGGGTAACGAAGAATCGACTCTCGCCGGGTAAACAATTCTTAGTCGTCATACACTCCTCTTTACGTTAAGAAAATAGAAGTAGCAGCGCTTTGTAAAGCATTAAAGCGTCATGGATTGCAAAATACACATAATATATCACTTGTATGACTACAGCTAGTTCTTCTGCTTC
GTGAATGCTGGTCGCTATACTGGATCAAAAAAGAAAAAGCAAATAAAAAATTTTCAATTCGGGTAACGAAGAATCGACTCTCGCCGGGTAAACAATTCTTAGTCGTCATACACTCCTCTTTACGTTAAGAAAATAGAAGTAGCAGCGCTTTGTAAAGCATTAAAGCGTCATGGATTGCAAAATACACATAATATATCACTTGTGATGACTACAGCTAGTTCTTCTGCTTC
GTGAATGCTGGTCGCTATACTGGATCAAAAAGAAAAAGCAAATAAAAAATTTTCAATTCGGGTAACGAAGAATCGACTCTCGCCGGGTAAACAATTCTTAGTCGTCATACACTCCTCTTTACGTTAAGAAAATAGAAGTAGCAGCGCTTTGTAAAGCATTAAAGCGTCATGGATTGCAAAATACACATAATATATCACTTGTGAATGACTACAGCTAGTTCTTCTGCTTC
GTGAATGCTGGTCGCTATACTGGATCAAAAGAAAAAGCAAATAAAAAATTTTCAATTCGGGTAACGAAGAATCGACTCTCGCCGGGTAAACAATTCTTAGTCGTCATACACTCCTCTTTACGTTAAGAAAATAGAAGTAGCAGCGCTTTGTAAAGCATTAAAGCGTCATGGATTGCAAAATACACATAATATATCACTTGTGATATGACTACAGCTAGTTCTTCTGCTTC
GTGAATGCTGGTCGCTATACTGGATCAAAGAAAAAGCAAATAAAAAATTTTCAATTCGGGTAACGAAGAATCGACTCTCGCCGGGTAAACAATTCTTAGTCGTCATACACTCCTCTTTACGTTAAGAAAATAGAAGTAGCAGCGCTTTGTAAAGCATTAAAGCGTCATGGATTGCAAAATACACATAATATATCACTTGTGATAATGACTACAGCTAGTTCTTCTGCTTC
GTGAATGCTGGTCGCTATACTGGATCAAGAAAAAGCAAATAAAAAATTTTCAATTCGGGTAACGAAGAATCGACTCTCGCCGGGTAAACAATTCTTAGTCGTCATACACTCCTCTTTACGTTAAGAAAATAGAAGTAGCAGCGCTTTGTAAAGCATTAAAGCGTCATGGATTGCAAAATACACATAATATATCACTTGTGATAGATGACTACAGCTAGTTCTTCTGCTTC
GTGAATGCTGGTCGCTATACTGGATCAGAAAAAGCAAATAAAAAATTTTCAATTCGGGTAACGAAGAATCGACTCTCGCCGGGTAAACAATTCTTAGTCGTCATACACTCCTCTTTACGTTAAGAAAATAGAAGTAGCAGCGCTTTGTAAAGCATTAAAGCGTCATGGATTGCAAAATACACATAATATATCACTTGTGATAGTATGACTACAGCTAGTTCTTCTGCTTC
GTGAATGCTGGTCGCTATACTGGATCGAAAAAGCAAATAAAAAATTTTCAATTCGGGTAACGAAGAATCGACTCTCGCCGGGTAAACAATTCTTAGTCGTCATACACTCCTCTTTACGTTAAGAAAATAGAAGTAGCAGCGCTTTGTAAAGCATTAAAGCGTCATGGATTGCAAAATACACATAATATATCACTTGTGATAGTGATGACTACAGCTAGTTCTTCTGCTTC
GTGAATGCTGGTCGCTATACTGGATCAAAAAGCAAATAAAAAATTTTCAATTCGGGTAACGAAGAATCGACTCTCGCCGGGTAAACAATTCTTAGTCGTCATACACTCCTCTTTACGTTAAGAAAATAGAAGTAGCAGCGCTTTGTAAAGCATTAAAGCGTCATGGATTGCAAAATACACATAATATATCACTTGTGATAGTGAATGACTACAGCTAGTTCTTCTGCTTC
GTGAATGCTGGTCGCTATACTGGATCAAAAGCAAATAAAAAATTTTCAATTCGGGTAACGAAGAATCGACTCTCGCCGGGTAAACAATTCTTAGTCGTCATACACTCCTCTTTACGTTAAGAAAATAGAAGTAGCAGCGCTTTGTAAAGCATTAAAGCGTCATGGATTGCAAAATACACATAATATATCACTTGTGATAGTGAGATGACTACAGCTAGTTCTTCTGCTTC
GTGAATGCTGGTCGCTATACTGGATCAAAGCAAATAAAAAATTTTCAATTCGGGTAACGAAGAATCGACTCTCGCCGGGTAAACAATTCTTAGTCGTCATACACTCCTCTTTACGTTAAGAAAATAGAAGTAGCAGCGCTTTGTAAAGCATTAAAGCGTCATGGATTGCAAAATACACATAATATATCACTTGTGATAGTGAGAATGACTACAGCTAGTTCTTCTGCTTC
GTGAATGCTGGTCGCTATACTGGATCAAGCAAATAAAAAATTTTCAATTCGGGTAACGAAGAATCGACTCTCGCCGGGTAAACAATTCTTAGTCGTCATACACTCCTCTTTACGTTAAGAAAATAGAAGTAGCAGCGCTTTGTAAAGCATTAAAGCGTCATGGATTGCAAAATACACATAATATATCACTTGTGATAGTGAGAAATGACTACAGCTAGTTCTTCTGCTTC
GTGAATGCTGGTCGCTATACTGGATCAGCAAATAAAAAATTTTCAATTCGGGTAACGAAGAATCGACTCTCGCCGGGTAAACAATTCTTAGTCGTCATACACTCCTCTTTACGTTAAGAAAATAGAAGTAGCAGCGCTTTGTAAAGCATTAAAGCGTCATGGATTGCAAAATACACATAATATATCACTTGTGATAGTGAGAAAATGACTACAGCTAGTTCTTCTGCTTC
GTGAATGCTGGTCGCTATACTGGATCGCAAATAAAAAATTTTCAATTCGGGTAACGAAGAATCGACTCTCGCCGGGTAAACAATTCTTAGTCGTCATACACTCCTCTTTACGTTAAGAAAATAGAAGTAGCAGCGCTTTGTAAAGCATTAAAGCGTCATGGATTGCAAAATACACATAATATATCACTTGTGATAGTGAGAAATATGACTACAGCTAGTTCTTCTGCTTC
GTGAATGCTGGTCGCTATACTGGATCCAAATAAAAAATTTTCAATTCGGGTAACGAAGAATCGACTCTCGCCGGGTAAACAATTCTTAGTCGTCATACACTCCTCTTTACGTTAAGAAAATAGAAGTAGCAGCGCTTTGTAAAGCATTAAAGCGTCATGGATTGCAAAATACACATAATATATCACTTGTGATAGTGAGAAATGATGACTACAGCTAGTTCTTCTGCTTC
GTGAATGCTGGTCGCTATACTGGATCAAATAAAAAATTTTCAATTCGGGTAACGAAGAATCGACTCTCGCCGGGTAAACAATTCTTAGTCGTCATACACTCCTCTTTACGTTAAGAAAATAGAAGTAGCAGCGCTTTGTAAAGCATTAAAGCGTCATGGATTGCAAAATACACATAATATATCACTTGTGATAGTGAGAAATGGATGACTACAGCTAGTTCTTCTGCTTC
GTGAATGCTGGTCGCTATACTGGATCAATAAAAAATTTTCAATTCGGGTAACGAAGAATCGACTCTCGCCGGGTAAACAATTCTTAGTCGTCATACACTCCTCTTTACGTTAAGAAAATAGAAGTAGCAGCGCTTTGTAAAGCATTAAAGCGTCATGGATTGCAAAATACACATAATATATCACTTGTGATAGTGAGAAATGGAATGACTACAGCTAGTTCTTCTGCTTC
GTGAATGCTGGTCGCTATACTGGATCATAAAAAATTTTCAATTCGGGTAACGAAGAATCGACTCTCGCCGGGTAAACAATTCTTAGTCGTCATACACTCCTCTTTACGTTAAGAAAATAGAAGTAGCAGCGCTTTGTAAAGCATTAAAGCGTCATGGATTGCAAAATACACATAATATATCACTTGTGATAGTGAGAAATGGAAATGACTACAGCTAGTTCTTCTGCTTC
GTGAATGCTGGTCGCTATACTGGATCTAAAAAATTTTCAATTCGGGTAACGAAGAATCGACTCTCGCCGGGTAAACAATTCTTAGTCGTCATACACTCCTCTTTACGTTAAGAAAATAGAAGTAGCAGCGCTTTGTAAAGCATTAAAGCGTCATGGATTGCAAAATACACATAATATATCACTTGTGATAGTGAGAAATGGAATATGACTACAGCTAGTTCTTCTGCTTC
GTGAATGCTGGTCGCTATACTGGATCAAAAAATTTTCAATTCGGGTAACGAAGAATCGACTCTCGCCGGGTAAACAATTCTTAGTCGTCATACACTCCTCTTTACGTTAAGAAAATAGAAGTAGCAGCGCTTTGTAAAGCATTAAAGCGTCATGGATTGCAAAATACACATAATATATCACTTGTGATAGTGAGAAATGGAATGATGACTACAGCTAGTTCTTCTGCTTC
GTGAATGCTGGTCGCTATACTGGATCAAAAATTTTCAATTCGGGTAACGAAGAATCGACTCTCGCCGGGTAAACAATTCTTAGTCGTCATACACTCCTCTTTACGTTAAGAAAATAGAAGTAGCAGCGCTTTGTAAAGCATTAAAGCGTCATGGATTGCAAAATACACATAATATATCACTTGTGATAGTGAGAAATGGAATGAATGACTACAGCTAGTTCTTCTGCTTC
GTGAATGCTGGTCGCTATACTGGATCAAAATTTTCAATTCGGGTAACGAAGAATCGACTCTCGCCGGGTAAACAATTCTTAGTCGTCATACACTCCTCTTTACGTTAAGAAAATAGAAGTAGCAGCGCTTTGTAAAGCATTAAAGCGTCATGGATTGCAAAATACACATAATATATCACTTGTGATAGTGAGAAATGGAATGAAATGACTACAGCTAGTTCTTCTGCTTC
GTGAATGCTGGTCGCTATACTGGATCAAATTTTCAATTCGGGTAACGAAGAATCGACTCTCGCCGGGTAAACAATTCTTAGTCGTCATACACTCCTCTTTACGTTAAGAAAATAGAAGTAGCAGCGCTTTGTAAAGCATTAAAGCGTCATGGATTGCAAAATACACATAATATATCACTTGTGATAGTGAGAAATGGAATGAAGATGACTACAGCTAGTTCTTCTGCTTC
GTGAATGCTGGTCGCTATACTGGATCAATTTTCAATTCGGGTAACGAAGAATCGACTCTCGCCGGGTAAACAATTCTTAGTCGTCATACACTCCTCTTTACGTTAAGAAAATAGAAGTAGCAGCGCTTTGTAAAGCATTAAAGCGTCATGGATTGCAAAATACACATAATATATCACTTGTGATAGTGAGAAATGGAATGAAGTATGACTACAGCTAGTTCTTCTGCTTC
GTGAATGCTGGTCGCTATACTGGATCATTTTCAATTCGGGTAACGAAGAATCGACTCTCGCCGGGTAAACAATTCTTAGTCGTCATACACTCCTCTTTACGTTAAGAAAATAGAAGTAGCAGCGCTTTGTAAAGCATTAAAGCGTCATGGATTGCAAAATACACATAATATATCACTTGTGATAGTGAGAAATGGAATGAAGTGATGACTACAGCTAGTTCTTCTGCTTC
GTGAATGCTGGTCGCTATACTGGATCTTTTCAATTCGGGTAACGAAGAATCGACTCTCGCCGGGTAAACAATTCTTAGTCGTCATACACTCCTCTTTACGTTAAGAAAATAGAAGTAGCAGCGCTTTGTAAAGCATTAAAGCGTCATGGATTGCAAAATACACATAATATATCACTTGTGATAGTGAGAAATGGAATGAAGTGGATGACTACAGCTAGTTCTTCTGCTTC
GTGAATGCTGGTCGCTATACTGGATCTTTCAATTCGGGTAACGAAGAATCGACTCTCGCCGGGTAAACAATTCTTAGTCGTCATACACTCCTCTTTACGTTAAGAAAATAGAAGTAGCAGCGCTTTGTAAAGCATTAAAGCGTCATGGATTGCAAAATACACATAATATATCACTTGTGATAGTGAGAAATGGAATGAAGTGGTATGACTACAGCTAGTTCTTCTGCTTC
GTGAATGCTGGTCGCTATACTGGATCTTCAATTCGGGTAACGAAGAATCGACTCTCGCCGGGTAAACAATTCTTAGTCGTCATACACTCCTCTTTACGTTAAGAAAATAGAAGTAGCAGCGCTTTGTAAAGCATTAAAGCGTCATGGATTGCAAAATACACATAATATATCACTTGTGATAGTGAGAAATGGAATGAAGTGGTTATGACTACAGCTAGTTCTTCTGCTTC
GTGAATGCTGGTCGCTATACTGGATCTCAATTCGGGTAACGAAGAATCGACTCTCGCCGGGTAAACAATTCTTAGTCGTCATACACTCCTCTTTACGTTAAGAAAATAGAAGTAGCAGCGCTTTGTAAAGCATTAAAGCGTCATGGATTGCAAAATACACATAATATATCACTTGTGATAGTGAGAAATGGAATGAAGTGGTTTATGACTACAGCTAGTTCTTCTGCTTC
GTGAATGCTGGTCGCTATACTGGATCCAATTCGGGTAACGAAGAATCGACTCTCGCCGGGTAAACAATTCTTAGTCGTCATACACTCCTCTTTACGTTAAGAAAATAGAAGTAGCAGCGCTTTGTAAAGCATTAAAGCGTCATGGATTGCAAAATACACATAATATATCACTTGTGATAGTGAGAAATGGAATGAAGTGGTTTAATGACTACAGCTAGTTCTTCTGCTTC
GTGAATGCTGGTCGCTATACTGGATCAATTCGGGTAACGAAGAATCGACTCTCGCCGGGTAAACAATTCTTAGTCGTCATACACTCCTCTTTACGTTAAGAAAATAGAAGTAGCAGCGCTTTGTAAAGCATTAAAGCGTCATGGATTGCAAAATACACATAATATATCACTTGTGATAGTGAGAAATGGAATGAAGTGGTTTAAATGACTACAGCTAGTTCTTCTGCTTC
GTGAATGCTGGTCGCTATACTGGATCATTCGGGTAACGAAGAATCGACTCTCGCCGGGTAAACAATTCTTAGTCGTCATACACTCCTCTTTACGTTAAGAAAATAGAAGTAGCAGCGCTTTGTAAAGCATTAAAGCGTCATGGATTGCAAAATACACATAATATATCACTTGTGATAGTGAGAAATGGAATGAAGTGGTTTAAGATGACTACAGCTAGTTCTTCTGCTTC
GTGAATGCTGGTCGCTATACTGGATCTTCGGGTAACGAAGAATCGACTCTCGCCGGGTAAACAATTCTTAGTCGTCATACACTCCTCTTTACGTTAAGAAAATAGAAGTAGCAGCGCTTTGTAAAGCATTAAAGCGTCATGGATTGCAAAATACACATAATATATCACTTGTGATAGTGAGAAATGGAATGAAGTGGTTTAAGAATGACTACAGCTAGTTCTTCTGCTTC
GTGAATGCTGGTCGCTATACTGGATCTCGGGTAACGAAGAATCGACTCTCGCCGGGTAAACAATTCTTAGTCGTCATACACTCCTCTTTACGTTAAGAAAATAGAAGTAGCAGCGCTTTGTAAAGCATTAAAGCGTCATGGATTGCAAAATACACATAATATATCACTTGTGATAGTGAGAAATGGAATGAAGTGGTTTAAGATATGACTACAGCTAGTTCTTCTGCTTC
GTGAATGCTGGTCGCTATACTGGATCCGGGTAACGAAGAATCGACTCTCGCCGGGTAAACAATTCTTAGTCGTCATACACTCCTCTTTACGTTAAGAAAATAGAAGTAGCAGCGCTTTGTAAAGCATTAAAGCGTCATGGATTGCAAAATACACATAATATATCACTTGTGATAGTGAGAAATGGAATGAAGTGGTTTAAGATGATGACTACAGCTAGTTCTTCTGCTTC
GTGAATGCTGGTCGCTATACTGGATCGGGTAACGAAGAATCGACTCTCGCCGGGTAAACAATTCTTAGTCGTCATACACTCCTCTTTACGTTAAGAAAATAGAAGTAGCAGCGCTTTGTAAAGCATTAAAGCGTCATGGATTGCAAAATACACATAATATATCACTTGTGATAGTGAGAAATGGAATGAAGTGGTTTAAGATGCATGACTACAGCTAGTTCTTCTGCTTC
GTGAATGCTGGTCGCTATACTGGATCGGTAACGAAGAATCGACTCTCGCCGGGTAAACAATTCTTAGTCGTCATACACTCCTCTTTACGTTAAGAAAATAGAAGTAGCAGCGCTTTGTAAAGCATTAAAGCGTCATGGATTGCAAAATACACATAATATATCACTTGTGATAGTGAGAAATGGAATGAAGTGGTTTAAGATGCTATGACTACAGCTAGTTCTTCTGCTTC
GTGAATGCTGGTCGCTATACTGGATCGTAACGAAGAATCGACTCTCGCCGGGTAAACAATTCTTAGTCGTCATACACTCCTCTTTACGTTAAGAAAATAGAAGTAGCAGCGCTTTGTAAAGCATTAAAGCGTCATGGATTGCAAAATACACATAATATATCACTTGTGATAGTGAGAAATGGAATGAAGTGGTTTAAGATGCTCATGACTACAGCTAGTTCTTCTGCTTC
GTGAATGCTGGTCGCTATACTGGATCTAACGAAGAATCGACTCTCGCCGGGTAAACAATTCTTAGTCGTCATACACTCCTCTTTACGTTAAGAAAATAGAAGTAGCAGCGCTTTGTAAAGCATTAAAGCGTCATGGATTGCAAAATACACATAATATATCACTTGTGATAGTGAGAAATGGAATGAAGTGGTTTAAGATGCTCTATGACTACAGCTAGTTCTTCTGCTTC
GTGAATGCTGGTCGCTATACTGGATCAACGAAGAATCGACTCTCGCCGGGTAAACAATTCTTAGTCGTCATACACTCCTCTTTACGTTAAGAAAATAGAAGTAGCAGCGCTTTGTAAAGCATTAAAGCGTCATGGATTGCAAAATACACATAATATATCACTTGTGATAGTGAGAAATGGAATGAAGTGGTTTAAGATGCTCTTATGACTACAGCTAGTTCTTCTGCTTC
GTGAATGCTGGTCGCTATACTGGATCACGAAGAATCGACTCTCGCCGGGTAAACAATTCTTAGTCGTCATACACTCCTCTTTACGTTAAGAAAATAGAAGTAGCAGCGCTTTGTAAAGCATTAAAGCGTCATGGATTGCAAAATACACATAATATATCACTTGTGATAGTGAGAAATGGAATGAAGTGGTTTAAGATGCTCTTTATGACTACAGCTAGTTCTTCTGCTTC
GTGAATGCTGGTCGCTATACTGGATCCGAAGAATCGACTCTCGCCGGGTAAACAATTCTTAGTCGTCATACACTCCTCTTTACGTTAAGAAAATAGAAGTAGCAGCGCTTTGTAAAGCATTAAAGCGTCATGGATTGCAAAATACACATAATATATCACTTGTGATAGTGAGAAATGGAATGAAGTGGTTTAAGATGCTCTTTTATGACTACAGCTAGTTCTTCTGCTTC
GTGAATGCTGGTCGCTATACTGGATCGAAGAATCGACTCTCGCCGGGTAAACAATTCTTAGTCGTCATACACTCCTCTTTACGTTAAGAAAATAGAAGTAGCAGCGCTTTGTAAAGCATTAAAGCGTCATGGATTGCAAAATACACATAATATATCACTTGTGATAGTGAGAAATGGAATGAAGTGGTTTAAGATGCTCTTTTAATGACTACAGCTAGTTCTTCTGCTTC
GTGAATGCTGGTCGCTATACTGGATCAAGAATCGACTCTCGCCGGGTAAACAATTCTTAGTCGTCATACACTCCTCTTTACGTTAAGAAAATAGAAGTAGCAGCGCTTTGTAAAGCATTAAAGCGTCATGGATTGCAAAATACACATAATATATCACTTGTGATAGTGAGAAATGGAATGAAGTGGTTTAAGATGCTCTTTTACATGACTACAGCTAGTTCTTCTGCTTC
GTGAATGCTGGTCGCTATACTGGATCAGAATCGACTCTCGCCGGGTAAACAATTCTTAGTCGTCATACACTCCTCTTTACGTTAAGAAAATAGAAGTAGCAGCGCTTTGTAAAGCATTAAAGCGTCATGGATTGCAAAATACACATAATATATCACTTGTGATAGTGAGAAATGGAATGAAGTGGTTTAAGATGCTCTTTTACCATGACTACAGCTAGTTCTTCTGCTTC
GTGAATGCTGGTCGCTATACTGGATCGAATCGACTCTCGCCGGGTAAACAATTCTTAGTCGTCATACACTCCTCTTTACGTTAAGAAAATAGAAGTAGCAGCGCTTTGTAAAGCATTAAAGCGTCATGGATTGCAAAATACACATAATATATCACTTGTGATAGTGAGAAATGGAATGAAGTGGTTTAAGATGCTCTTTTACCAATGACTACAGCTAGTTCTTCTGCTTC
GTGAATGCTGGTCGCTATACTGGATCAATCGACTCTCGCCGGGTAAACAATTCTTAGTCGTCATACACTCCTCTTTACGTTAAGAAAATAGAAGTAGCAGCGCTTTGTAAAGCATTAAAGCGTCATGGATTGCAAAATACACATAATATATCACTTGTGATAGTGAGAAATGGAATGAAGTGGTTTAAGATGCTCTTTTACCAAATGACTACAGCTAGTTCTTCTGCTTC
GTGAATGCTGGTCGCTATACTGGATCATCGACTCTCGCCGGGTAAACAATTCTTAGTCGTCATACACTCCTCTTTACGTTAAGAAAATAGAAGTAGCAGCGCTTTGTAAAGCATTAAAGCGTCATGGATTGCAAAATACACATAATATATCACTTGTGATAGTGAGAAATGGAATGAAGTGGTTTAAGATGCTCTTTTACCAATATGACTACAGCTAGTTCTTCTGCTTC
GTGAATGCTGGTCGCTATACTGGATCTCGACTCTCGCCGGGTAAACAATTCTTAGTCGTCATACACTCCTCTTTACGTTAAGAAAATAGAAGTAGCAGCGCTTTGTAAAGCATTAAAGCGTCATGGATTGCAAAATACACATAATATATCACTTGTGATAGTGAGAAATGGAATGAAGTGGTTTAAGATGCTCTTTTACCAATAATGACTACAGCTAGTTCTTCTGCTTC
GTGAATGCTGGTCGCTATACTGGATCCGACTCTCGCCGGGTAAACAATTCTTAGTCGTCATACACTCCTCTTTACGTTAAGAAAATAGAAGTAGCAGCGCTTTGTAAAGCATTAAAGCGTCATGGATTGCAAAATACACATAATATATCACTTGTGATAGTGAGAAATGGAATGAAGTGGTTTAAGATGCTCTTTTACCAATAAATGACTACAGCTAGTTCTTCTGCTTC
GTGAATGCTGGTCGCTATACTGGATCGACTCTCGCCGGGTAAACAATTCTTAGTCGTCATACACTCCTCTTTACGTTAAGAAAATAGAAGTAGCAGCGCTTTGTAAAGCATTAAAGCGTCATGGATTGCAAAATACACATAATATATCACTTGTGATAGTGAGAAATGGAATGAAGTGGTTTAAGATGCTCTTTTACCAATAAAATGACTACAGCTAGTTCTTCTGCTTC
GTGAATGCTGGTCGCTATACTGGATCACTCTCGCCGGGTAAACAATTCTTAGTCGTCATACACTCCTCTTTACGTTAAGAAAATAGAAGTAGCAGCGCTTTGTAAAGCATTAAAGCGTCATGGATTGCAAAATACACATAATATATCACTTGTGATAGTGAGAAATGGAATGAAGTGGTTTAAGATGCTCTTTTACCAATAAACATGACTACAGCTAGTTCTTCTGCTTC
GTGAATGCTGGTCGCTATACTGGATCCTCTCGCCGGGTAAACAATTCTTAGTCGTCATACACTCCTCTTTACGTTAAGAAAATAGAAGTAGCAGCGCTTTGTAAAGCATTAAAGCGTCATGGATTGCAAAATACACATAATATATCACTTGTGATAGTGAGAAATGGAATGAAGTGGTTTAAGATGCTCTTTTACCAATAAACAATGACTACAGCTAGTTCTTCTGCTTC
GTGAATGCTGGTCGCTATACTGGATCTCTCGCCGGGTAAACAATTCTTAGTCGTCATACACTCCTCTTTACGTTAAGAAAATAGAAGTAGCAGCGCTTTGTAAAGCATTAAAGCGTCATGGATTGCAAAATACACATAATATATCACTTGTGATAGTGAGAAATGGAATGAAGTGGTTTAAGATGCTCTTTTACCAATAAACATATGACTACAGCTAGTTCTTCTGCTTC
GTGAATGCTGGTCGCTATACTGGATCCTCGCCGGGTAAACAATTCTTAGTCGTCATACACTCCTCTTTACGTTAAGAAAATAGAAGTAGCAGCGCTTTGTAAAGCATTAAAGCGTCATGGATTGCAAAATACACATAATATATCACTTGTGATAGTGAGAAATGGAATGAAGTGGTTTAAGATGCTCTTTTACCAATAAACATAATGACTACAGCTAGTTCTTCTGCTTC
GTGAATGCTGGTCGCTATACTGGATCTCGCCGGGTAAACAATTCTTAGTCGTCATACACTCCTCTTTACGTTAAGAAAATAGAAGTAGCAGCGCTTTGTAAAGCATTAAAGCGTCATGGATTGCAAAATACACATAATATATCACTTGTGATAGTGAGAAATGGAATGAAGTGGTTTAAGATGCTCTTTTACCAATAAACATATATGACTACAGCTAGTTCTTCTGCTTC
GTGAATGCTGGTCGCTATACTGGATCCGCCGGGTAAACAATTCTTAGTCGTCATACACTCCTCTTTACGTTAAGAAAATAGAAGTAGCAGCGCTTTGTAAAGCATTAAAGCGTCATGGATTGCAAAATACACATAATATATCACTTGTGATAGTGAGAAATGGAATGAAGTGGTTTAAGATGCTCTTTTACCAATAAACATATTATGACTACAGCTAGTTCTTCTGCTTC
GTGAATGCTGGTCGCTATACTGGATCGCCGGGTAAACAATTCTTAGTCGTCATACACTCCTCTTTACGTTAAGAAAATAGAAGTAGCAGCGCTTTGTAAAGCATTAAAGCGTCATGGATTGCAAAATACACATAATATATCACTTGTGATAGTGAGAAATGGAATGAAGTGGTTTAAGATGCTCTTTTACCAATAAACATATTGATGACTACAGCTAGTTCTTCTGCTTC
GTGAATGCTGGTCGCTATACTGGATCCCGGGTAAACAATTCTTAGTCGTCATACACTCCTCTTTACGTTAAGAAAATAGAAGTAGCAGCGCTTTGTAAAGCATTAAAGCGTCATGGATTGCAAAATACACATAATATATCACTTGTGATAGTGAGAAATGGAATGAAGTGGTTTAAGATGCTCTTTTACCAATAAACATATTGCATGACTACAGCTAGTTCTTCTGCTTC
GTGAATGCTGGTCGCTATACTGGATCCGGGTAAACAATTCTTAGTCGTCATACACTCCTCTTTACGTTAAGAAAATAGAAGTAGCAGCGCTTTGTAAAGCATTAAAGCGTCATGGATTGCAAAATACACATAATATATCACTTGTGATAGTGAGAAATGGAATGAAGTGGTTTAAGATGCTCTTTTACCAATAAACATATTGCGATGACTACAGCTAGTTCTTCTGCTTC
GTGAATGCTGGTCGCTATACTGGATCGGGTAAACAATTCTTAGTCGTCATACACTCCTCTTTACGTTAAGAAAATAGAAGTAGCAGCGCTTTGTAAAGCATTAAAGCGTCATGGATTGCAAAATACACATAATATATCACTTGTGATAGTGAGAAATGGAATGAAGTGGTTTAAGATGCTCTTTTACCAATAAACATATTGCGCATGACTACAGCTAGTTCTTCTGCTTC
GTGAATGCTGGTCGCTATACTGGATCGGTAAACAATTCTTAGTCGTCATACACTCCTCTTTACGTTAAGAAAATAGAAGTAGCAGCGCTTTGTAAAGCATTAAAGCGTCATGGATTGCAAAATACACATAATATATCACTTGTGATAGTGAGAAATGGAATGAAGTGGTTTAAGATGCTCTTTTACCAATAAACATATTGCGCCATGACTACAGCTAGTTCTTCTGCTTC
GTGAATGCTGGTCGCTATACTGGATCGTAAACAATTCTTAGTCGTCATACACTCCTCTTTACGTTAAGAAAATAGAAGTAGCAGCGCTTTGTAAAGCATTAAAGCGTCATGGATTGCAAAATACACATAATATATCACTTGTGATAGTGAGAAATGGAATGAAGTGGTTTAAGATGCTCTTTTACCAATAAACATATTGCGCCTATGACTACAGCTAGTTCTTCTGCTTC
GTGAATGCTGGTCGCTATACTGGATCTAAACAATTCTTAGTCGTCATACACTCCTCTTTACGTTAAGAAAATAGAAGTAGCAGCGCTTTGTAAAGCATTAAAGCGTCATGGATTGCAAAATACACATAATATATCACTTGTGATAGTGAGAAATGGAATGAAGTGGTTTAAGATGCTCTTTTACCAATAAACATATTGCGCCTAATGACTACAGCTAGTTCTTCTGCTTC
GTGAATGCTGGTCGCTATACTGGATCAAACAATTCTTAGTCGTCATACACTCCTCTTTACGTTAAGAAAATAGAAGTAGCAGCGCTTTGTAAAGCATTAAAGCGTCATGGATTGCAAAATACACATAATATATCACTTGTGATAGTGAGAAATGGAATGAAGTGGTTTAAGATGCTCTTTTACCAATAAACATATTGCGCCTATATGACTACAGCTAGTTCTTCTGCTTC
GTGAATGCTGGTCGCTATACTGGATCAACAATTCTTAGTCGTCATACACTCCTCTTTACGTTAAGAAAATAGAAGTAGCAGCGCTTTGTAAAGCATTAAAGCGTCATGGATTGCAAAATACACATAATATATCACTTGTGATAGTGAGAAATGGAATGAAGTGGTTTAAGATGCTCTTTTACCAATAAACATATTGCGCCTATCATGACTACAGCTAGTTCTTCTGCTTC
GTGAATGCTGGTCGCTATACTGGATCACAATTCTTAGTCGTCATACACTCCTCTTTACGTTAAGAAAATAGAAGTAGCAGCGCTTTGTAAAGCATTAAAGCGTCATGGATTGCAAAATACACATAATATATCACTTGTGATAGTGAGAAATGGAATGAAGTGGTTTAAGATGCTCTTTTACCAATAAACATATTGCGCCTATCAATGACTACAGCTAGTTCTTCTGCTTC
GTGAATGCTGGTCGCTATACTGGATCCAATTCTTAGTCGTCATACACTCCTCTTTACGTTAAGAAAATAGAAGTAGCAGCGCTTTGTAAAGCATTAAAGCGTCATGGATTGCAAAATACACATAATATATCACTTGTGATAGTGAGAAATGGAATGAAGTGGTTTAAGATGCTCTTTTACCAATAAACATATTGCGCCTATCAAATGACTACAGCTAGTTCTTCTGCTTC
GTGAATGCTGGTCGCTATACTGGATCAATTCTTAGTCGTCATACACTCCTCTTTACGTTAAGAAAATAGAAGTAGCAGCGCTTTGTAAAGCATTAAAGCGTCATGGATTGCAAAATACACATAATATATCACTTGTGATAGTGAGAAATGGAATGAAGTGGTTTAAGATGCTCTTTTACCAATAAACATATTGCGCCTATCAAAATGACTACAGCTAGTTCTTCTGCTTC
GTGAATGCTGGTCGCTATACTGGATCATTCTTAGTCGTCATACACTCCTCTTTACGTTAAGAAAATAGAAGTAGCAGCGCTTTGTAAAGCATTAAAGCGTCATGGATTGCAAAATACACATAATATATCACTTGTGATAGTGAGAAATGGAATGAAGTGGTTTAAGATGCTCTTTTACCAATAAACATATTGCGCCTATCAAATATGACTACAGCTAGTTCTTCTGCTTC
GTGAATGCTGGTCGCTATACTGGATCTTCTTAGTCGTCATACACTCCTCTTTACGTTAAGAAAATAGAAGTAGCAGCGCTTTGTAAAGCATTAAAGCGTCATGGATTGCAAAATACACATAATATATCACTTGTGATAGTGAGAAATGGAATGAAGTGGTTTAAGATGCTCTTTTACCAATAAACATATTGCGCCTATCAAATCATGACTACAGCTAGTTCTTCTGCTTC
GTGAATGCTGGTCGCTATACTGGATCTCTTAGTCGTCATACACTCCTCTTTACGTTAAGAAAATAGAAGTAGCAGCGCTTTGTAAAGCATTAAAGCGTCATGGATTGCAAAATACACATAATATATCACTTGTGATAGTGAGAAATGGAATGAAGTGGTTTAAGATGCTCTTTTACCAATAAACATATTGCGCCTATCAAATCAATGACTACAGCTAGTTCTTCTGCTTC
GTGAATGCTGGTCGCTATACTGGATCCTTAGTCGTCATACACTCCTCTTTACGTTAAGAAAATAGAAGTAGCAGCGCTTTGTAAAGCATTAAAGCGTCATGGATTGCAAAATACACATAATATATCACTTGTGATAGTGAGAAATGGAATGAAGTGGTTTAAGATGCTCTTTTACCAATAAACATATTGCGCCTATCAAATCATATGACTACAGCTAGTTCTTCTGCTTC
GTGAATGCTGGTCGCTATACTGGATCTTAGTCGTCATACACTCCTCTTTACGTTAAGAAAATAGAAGTAGCAGCGCTTTGTAAAGCATTAAAGCGTCATGGATTGCAAAATACACATAATATATCACTTGTGATAGTGAGAAATGGAATGAAGTGGTTTAAGATGCTCTTTTACCAATAAACATATTGCGCCTATCAAATCATTATGACTACAGCTAGTTCTTCTGCTTC
GTGAATGCTGGTCGCTATACTGGATCTAGTCGTCATACACTCCTCTTTACGTTAAGAAAATAGAAGTAGCAGCGCTTTGTAAAGCATTAAAGCGTCATGGATTGCAAAATACACATAATATATCACTTGTGATAGTGAGAAATGGAATGAAGTGGTTTAAGATGCTCTTTTACCAATAAACATATTGCGCCTATCAAATCATTTATGACTACAGCTAGTTCTTCTGCTTC
GTGAATGCTGGTCGCTATACTGGATCAGTCGTCATACACTCCTCTTTACGTTAAGAAAATAGAAGTAGCAGCGCTTTGTAAAGCATTAAAGCGTCATGGATTGCAAAATACACATAATATATCACTTGTGATAGTGAGAAATGGAATGAAGTGGTTTAAGATGCTCTTTTACCAATAAACATATTGCGCCTATCAAATCATTTTATGACTACAGCTAGTTCTTCTGCTTC
GTGAATGCTGGTCGCTATACTGGATCGTCGTCATACACTCCTCTTTACGTTAAGAAAATAGAAGTAGCAGCGCTTTGTAAAGCATTAAAGCGTCATGGATTGCAAAATACACATAATATATCACTTGTGATAGTGAGAAATGGAATGAAGTGGTTTAAGATGCTCTTTTACCAATAAACATATTGCGCCTATCAAATCATTTTCATGACTACAGCTAGTTCTTCTGCTTC
GTGAATGCTGGTCGCTATACTGGATCTCGTCATACACTCCTCTTTACGTTAAGAAAATAGAAGTAGCAGCGCTTTGTAAAGCATTAAAGCGTCATGGATTGCAAAATACACATAATATATCACTTGTGATAGTGAGAAATGGAATGAAGTGGTTTAAGATGCTCTTTTACCAATAAACATATTGCGCCTATCAAATCATTTTCCATGACTACAGCTAGTTCTTCTGCTTC
GTGAATGCTGGTCGCTATACTGGATCCGTCATACACTCCTCTTTACGTTAAGAAAATAGAAGTAGCAGCGCTTTGTAAAGCATTAAAGCGTCATGGATTGCAAAATACACATAATATATCACTTGTGATAGTGAGAAATGGAATGAAGTGGTTTAAGATGCTCTTTTACCAATAAACATATTGCGCCTATCAAATCATTTTCCAATGACTACAGCTAGTTCTTCTGCTTC
GTGAATGCTGGTCGCTATACTGGATCGTCATACACTCCTCTTTACGTTAAGAAAATAGAAGTAGCAGCGCTTTGTAAAGCATTAAAGCGTCATGGATTGCAAAATACACATAATATATCACTTGTGATAGTGAGAAATGGAATGAAGTGGTTTAAGATGCTCTTTTACCAATAAACATATTGCGCCTATCAAATCATTTTCCACATGACTACAGCTAGTTCTTCTGCTTC
GTGAATGCTGGTCGCTATACTGGATCTCATACACTCCTCTTTACGTTAAGAAAATAGAAGTAGCAGCGCTTTGTAAAGCATTAAAGCGTCATGGATTGCAAAATACACATAATATATCACTTGTGATAGTGAGAAATGGAATGAAGTGGTTTAAGATGCTCTTTTACCAATAAACATATTGCGCCTATCAAATCATTTTCCACCATGACTACAGCTAGTTCTTCTGCTTC
GTGAATGCTGGTCGCTATACTGGATCCATACACTCCTCTTTACGTTAAGAAAATAGAAGTAGCAGCGCTTTGTAAAGCATTAAAGCGTCATGGATTGCAAAATACACATAATATATCACTTGTGATAGTGAGAAATGGAATGAAGTGGTTTAAGATGCTCTTTTACCAATAAACATATTGCGCCTATCAAATCATTTTCCACCCATGACTACAGCTAGTTCTTCTGCTTC
GTGAATGCTGGTCGCTATACTGGATCATACACTCCTCTTTACGTTAAGAAAATAGAAGTAGCAGCGCTTTGTAAAGCATTAAAGCGTCATGGATTGCAAAATACACATAATATATCACTTGTGATAGTGAGAAATGGAATGAAGTGGTTTAAGATGCTCTTTTACCAATAAACATATTGCGCCTATCAAATCATTTTCCACCCCATGACTACAGCTAGTTCTTCTGCTTC
GTGAATGCTGGTCGCTATACTGGATCTACACTCCTCTTTACGTTAAGAAAATAGAAGTAGCAGCGCTTTGTAAAGCATTAAAGCGTCATGGATTGCAAAATACACATAATATATCACTTGTGATAGTGAGAAATGGAATGAAGTGGTTTAAGATGCTCTTTTACCAATAAACATATTGCGCCTATCAAATCATTTTCCACCCCTATGACTACAGCTAGTTCTTCTGCTTC
GTGAATGCTGGTCGCTATACTGGATCACACTCCTCTTTACGTTAAGAAAATAGAAGTAGCAGCGCTTTGTAAAGCATTAAAGCGTCATGGATTGCAAAATACACATAATATATCACTTGTGATAGTGAGAAATGGAATGAAGTGGTTTAAGATGCTCTTTTACCAATAAACATATTGCGCCTATCAAATCATTTTCCACCCCTGATGACTACAGCTAGTTCTTCTGCTTC
GTGAATGCTGGTCGCTATACTGGATCCACTCCTCTTTACGTTAAGAAAATAGAAGTAGCAGCGCTTTGTAAAGCATTAAAGCGTCATGGATTGCAAAATACACATAATATATCACTTGTGATAGTGAGAAATGGAATGAAGTGGTTTAAGATGCTCTTTTACCAATAAACATATTGCGCCTATCAAATCATTTTCCACCCCTGTATGACTACAGCTAGTTCTTCTGCTTC
GTGAATGCTGGTCGCTATACTGGATCACTCCTCTTTACGTTAAGAAAATAGAAGTAGCAGCGCTTTGTAAAGCATTAAAGCGTCATGGATTGCAAAATACACATAATATATCACTTGTGATAGTGAGAAATGGAATGAAGTGGTTTAAGATGCTCTTTTACCAATAAACATATTGCGCCTATCAAATCATTTTCCACCCCTGTTATGACTACAGCTAGTTCTTCTGCTTC
GTGAATGCTGGTCGCTATACTGGATCCTCCTCTTTACGTTAAGAAAATAGAAGTAGCAGCGCTTTGTAAAGCATTAAAGCGTCATGGATTGCAAAATACACATAATATATCACTTGTGATAGTGAGAAATGGAATGAAGTGGTTTAAGATGCTCTTTTACCAATAAACATATTGCGCCTATCAAATCATTTTCCACCCCTGTTAATGACTACAGCTAGTTCTTCTGCTTC
GTGAATGCTGGTCGCTATACTGGATCTCCTCTTTACGTTAAGAAAATAGAAGTAGCAGCGCTTTGTAAAGCATTAAAGCGTCATGGATTGCAAAATACACATAATATATCACTTGTGATAGTGAGAAATGGAATGAAGTGGTTTAAGATGCTCTTTTACCAATAAACATATTGCGCCTATCAAATCATTTTCCACCCCTGTTAAATGACTACAGCTAGTTCTTCTGCTTC
GTGAATGCTGGTCGCTATACTGGATCCCTCTTTACGTTAAGAAAATAGAAGTAGCAGCGCTTTGTAAAGCATTAAAGCGTCATGGATTGCAAAATACACATAATATATCACTTGTGATAGTGAGAAATGGAATGAAGTGGTTTAAGATGCTCTTTTACCAATAAACATATTGCGCCTATCAAATCATTTTCCACCCCTGTTAACATGACTACAGCTAGTTCTTCTGCTTC
GTGAATGCTGGTCGCTATACTGGATCCTCTTTACGTTAAGAAAATAGAAGTAGCAGCGCTTTGTAAAGCATTAAAGCGTCATGGATTGCAAAATACACATAATATATCACTTGTGATAGTGAGAAATGGAATGAAGTGGTTTAAGATGCTCTTTTACCAATAAACATATTGCGCCTATCAAATCATTTTCCACCCCTGTTAACTATGACTACAGCTAGTTCTTCTGCTTC
GTGAATGCTGGTCGCTATACTGGATCTCTTTACGTTAAGAAAATAGAAGTAGCAGCGCTTTGTAAAGCATTAAAGCGTCATGGATTGCAAAATACACATAATATATCACTTGTGATAGTGAGAAATGGAATGAAGTGGTTTAAGATGCTCTTTTACCAATAAACATATTGCGCCTATCAAATCATTTTCCACCCCTGTTAACTGATGACTACAGCTAGTTCTTCTGCTTC
GTGAATGCTGGTCGCTATACTGGATCCTTTACGTTAAGAAAATAGAAGTAGCAGCGCTTTGTAAAGCATTAAAGCGTCATGGATTGCAAAATACACATAATATATCACTTGTGATAGTGAGAAATGGAATGAAGTGGTTTAAGATGCTCTTTTACCAATAAACATATTGCGCCTATCAAATCATTTTCCACCCCTGTTAACTGAATGACTACAGCTAGTTCTTCTGCTTC
GTGAATGCTGGTCGCTATACTGGATCTTTACGTTAAGAAAATAGAAGTAGCAGCGCTTTGTAAAGCATTAAAGCGTCATGGATTGCAAAATACACATAATATATCACTTGTGATAGTGAGAAATGGAATGAAGTGGTTTAAGATGCTCTTTTACCAATAAACATATTGCGCCTATCAAATCATTTTCCACCCCTGTTAACTGATATGACTACAGCTAGTTCTTCTGCTTC
GTGAATGCTGGTCGCTATACTGGATCTTACGTTAAGAAAATAGAAGTAGCAGCGCTTTGTAAAGCATTAAAGCGTCATGGATTGCAAAATACACATAATATATCACTTGTGATAGTGAGAAATGGAATGAAGTGGTTTAAGATGCTCTTTTACCAATAAACATATTGCGCCTATCAAATCATTTTCCACCCCTGTTAACTGATAATGACTACAGCTAGTTCTTCTGCTTC
GTGAATGCTGGTCGCTATACTGGATCTACGTTAAGAAAATAGAAGTAGCAGCGCTTTGTAAAGCATTAAAGCGTCATGGATTGCAAAATACACATAATATATCACTTGTGATAGTGAGAAATGGAATGAAGTGGTTTAAGATGCTCTTTTACCAATAAACATATTGCGCCTATCAAATCATTTTCCACCCCTGTTAACTGATACATGACTACAGCTAGTTCTTCTGCTTC
GTGAATGCTGGTCGCTATACTGGATCACGTTAAGAAAATAGAAGTAGCAGCGCTTTGTAAAGCATTAAAGCGTCATGGATTGCAAAATACACATAATATATCACTTGTGATAGTGAGAAATGGAATGAAGTGGTTTAAGATGCTCTTTTACCAATAAACATATTGCGCCTATCAAATCATTTTCCACCCCTGTTAACTGATACAATGACTACAGCTAGTTCTTCTGCTTC
GTGAATGCTGGTCGCTATACTGGATCCGTTAAGAAAATAGAAGTAGCAGCGCTTTGTAAAGCATTAAAGCGTCATGGATTGCAAAATACACATAATATATCACTTGTGATAGTGAGAAATGGAATGAAGTGGTTTAAGATGCTCTTTTACCAATAAACATATTGCGCCTATCAAATCATTTTCCACCCCTGTTAACTGATACAGATGACTACAGCTAGTTCTTCTGCTTC
GTGAATGCTGGTCGCTATACTGGATCGTTAAGAAAATAGAAGTAGCAGCGCTTTGTAAAGCATTAAAGCGTCATGGATTGCAAAATACACATAATATATCACTTGTGATAGTGAGAAATGGAATGAAGTGGTTTAAGATGCTCTTTTACCAATAAACATATTGCGCCTATCAAATCATTTTCCACCCCTGTTAACTGATACAGAATGACTACAGCTAGTTCTTCTGCTTC
GTGAATGCTGGTCGCTATACTGGATCTTAAGAAAATAGAAGTAGCAGCGCTTTGTAAAGCATTAAAGCGTCATGGATTGCAAAATACACATAATATATCACTTGTGATAGTGAGAAATGGAATGAAGTGGTTTAAGATGCTCTTTTACCAATAAACATATTGCGCCTATCAAATCATTTTCCACCCCTGTTAACTGATACAGATATGACTACAGCTAGTTCTTCTGCTTC
GTGAATGCTGGTCGCTATACTGGATCTAAGAAAATAGAAGTAGCAGCGCTTTGTAAAGCATTAAAGCGTCATGGATTGCAAAATACACATAATATATCACTTGTGATAGTGAGAAATGGAATGAAGTGGTTTAAGATGCTCTTTTACCAATAAACATATTGCGCCTATCAAATCATTTTCCACCCCTGTTAACTGATACAGATAATGACTACAGCTAGTTCTTCTGCTTC
GTGAATGCTGGTCGCTATACTGGATCAAGAAAATAGAAGTAGCAGCGCTTTGTAAAGCATTAAAGCGTCATGGATTGCAAAATACACATAATATATCACTTGTGATAGTGAGAAATGGAATGAAGTGGTTTAAGATGCTCTTTTACCAATAAACATATTGCGCCTATCAAATCATTTTCCACCCCTGTTAACTGATACAGATATATGACTACAGCTAGTTCTTCTGCTTC
GTGAATGCTGGTCGCTATACTGGATCAGAAAATAGAAGTAGCAGCGCTTTGTAAAGCATTAAAGCGTCATGGATTGCAAAATACACATAATATATCACTTGTGATAGTGAGAAATGGAATGAAGTGGTTTAAGATGCTCTTTTACCAATAAACATATTGCGCCTATCAAATCATTTTCCACCCCTGTTAACTGATACAGATATAATGACTACAGCTAGTTCTTCTGCTTC
GTGAATGCTGGTCGCTATACTGGATCGAAAATAGAAGTAGCAGCGCTTTGTAAAGCATTAAAGCGTCATGGATTGCAAAATACACATAATATATCACTTGTGATAGTGAGAAATGGAATGAAGTGGTTTAAGATGCTCTTTTACCAATAAACATATTGCGCCTATCAAATCATTTTCCACCCCTGTTAACTGATACAGATATAGATGACTACAGCTAGTTCTTCTGCTTC
GTGAATGCTGGTCGCTATACTGGATCAAAATAGAAGTAGCAGCGCTTTGTAAAGCATTAAAGCGTCATGGATTGCAAAATACACATAATATATCACTTGTGATAGTGAGAAATGGAATGAAGTGGTTTAAGATGCTCTTTTACCAATAAACATATTGCGCCTATCAAATCATTTTCCACCCCTGTTAACTGATACAGATATAGCATGACTACAGCTAGTTCTTCTGCTTC
GTGAATGCTGGTCGCTATACTGGATCAAATAGAAGTAGCAGCGCTTTGTAAAGCATTAAAGCGTCATGGATTGCAAAATACACATAATATATCACTTGTGATAGTGAGAAATGGAATGAAGTGGTTTAAGATGCTCTTTTACCAATAAACATATTGCGCCTATCAAATCATTTTCCACCCCTGTTAACTGATACAGATATAGCCATGACTACAGCTAGTTCTTCTGCTTC
GTGAATGCTGGTCGCTATACTGGATCAATAGAAGTAGCAGCGCTTTGTAAAGCATTAAAGCGTCATGGATTGCAAAATACACATAATATATCACTTGTGATAGTGAGAAATGGAATGAAGTGGTTTAAGATGCTCTTTTACCAATAAACATATTGCGCCTATCAAATCATTTTCCACCCCTGTTAACTGATACAGATATAGCCTATGACTACAGCTAGTTCTTCTGCTTC
GTGAATGCTGGTCGCTATACTGGATCATAGAAGTAGCAGCGCTTTGTAAAGCATTAAAGCGTCATGGATTGCAAAATACACATAATATATCACTTGTGATAGTGAGAAATGGAATGAAGTGGTTTAAGATGCTCTTTTACCAATAAACATATTGCGCCTATCAAATCATTTTCCACCCCTGTTAACTGATACAGATATAGCCTTATGACTACAGCTAGTTCTTCTGCTTC
GTGAATGCTGGTCGCTATACTGGATCTAGAAGTAGCAGCGCTTTGTAAAGCATTAAAGCGTCATGGATTGCAAAATACACATAATATATCACTTGTGATAGTGAGAAATGGAATGAAGTGGTTTAAGATGCTCTTTTACCAATAAACATATTGCGCCTATCAAATCATTTTCCACCCCTGTTAACTGATACAGATATAGCCTTAATGACTACAGCTAGTTCTTCTGCTTC
GTGAATGCTGGTCGCTATACTGGATCAGAAGTAGCAGCGCTTTGTAAAGCATTAAAGCGTCATGGATTGCAAAATACACATAATATATCACTTGTGATAGTGAGAAATGGAATGAAGTGGTTTAAGATGCTCTTTTACCAATAAACATATTGCGCCTATCAAATCATTTTCCACCCCTGTTAACTGATACAGATATAGCCTTACATGACTACAGCTAGTTCTTCTGCTTC
GTGAATGCTGGTCGCTATACTGGATCGAAGTAGCAGCGCTTTGTAAAGCATTAAAGCGTCATGGATTGCAAAATACACATAATATATCACTTGTGATAGTGAGAAATGGAATGAAGTGGTTTAAGATGCTCTTTTACCAATAAACATATTGCGCCTATCAAATCATTTTCCACCCCTGTTAACTGATACAGATATAGCCTTACAATGACTACAGCTAGTTCTTCTGCTTC
GTGAATGCTGGTCGCTATACTGGATCAAGTAGCAGCGCTTTGTAAAGCATTAAAGCGTCATGGATTGCAAAATACACATAATATATCACTTGTGATAGTGAGAAATGGAATGAAGTGGTTTAAGATGCTCTTTTACCAATAAACATATTGCGCCTATCAAATCATTTTCCACCCCTGTTAACTGATACAGATATAGCCTTACATATGACTACAGCTAGTTCTTCTGCTTC
GTGAATGCTGGTCGCTATACTGGATCAGTAGCAGCGCTTTGTAAAGCATTAAAGCGTCATGGATTGCAAAATACACATAATATATCACTTGTGATAGTGAGAAATGGAATGAAGTGGTTTAAGATGCTCTTTTACCAATAAACATATTGCGCCTATCAAATCATTTTCCACCCCTGTTAACTGATACAGATATAGCCTTACATAATGACTACAGCTAGTTCTTCTGCTTC
GTGAATGCTGGTCGCTATACTGGATCGTAGCAGCGCTTTGTAAAGCATTAAAGCGTCATGGATTGCAAAATACACATAATATATCACTTGTGATAGTGAGAAATGGAATGAAGTGGTTTAAGATGCTCTTTTACCAATAAACATATTGCGCCTATCAAATCATTTTCCACCCCTGTTAACTGATACAGATATAGCCTTACATATATGACTACAGCTAGTTCTTCTGCTTC
GTGAATGCTGGTCGCTATACTGGATCTAGCAGCGCTTTGTAAAGCATTAAAGCGTCATGGATTGCAAAATACACATAATATATCACTTGTGATAGTGAGAAATGGAATGAAGTGGTTTAAGATGCTCTTTTACCAATAAACATATTGCGCCTATCAAATCATTTTCCACCCCTGTTAACTGATACAGATATAGCCTTACATATAATGACTACAGCTAGTTCTTCTGCTTC
GTGAATGCTGGTCGCTATACTGGATCAGCAGCGCTTTGTAAAGCATTAAAGCGTCATGGATTGCAAAATACACATAATATATCACTTGTGATAGTGAGAAATGGAATGAAGTGGTTTAAGATGCTCTTTTACCAATAAACATATTGCGCCTATCAAATCATTTTCCACCCCTGTTAACTGATACAGATATAGCCTTACATATAAATGACTACAGCTAGTTCTTCTGCTTC
GTGAATGCTGGTCGCTATACTGGATCGCAGCGCTTTGTAAAGCATTAAAGCGTCATGGATTGCAAAATACACATAATATATCACTTGTGATAGTGAGAAATGGAATGAAGTGGTTTAAGATGCTCTTTTACCAATAAACATATTGCGCCTATCAAATCATTTTCCACCCCTGTTAACTGATACAGATATAGCCTTACATATAACATGACTACAGCTAGTTCTTCTGCTTC
GTGAATGCTGGTCGCTATACTGGATCCAGCGCTTTGTAAAGCATTAAAGCGTCATGGATTGCAAAATACACATAATATATCACTTGTGATAGTGAGAAATGGAATGAAGTGGTTTAAGATGCTCTTTTACCAATAAACATATTGCGCCTATCAAATCATTTTCCACCCCTGTTAACTGATACAGATATAGCCTTACATATAACTATGACTACAGCTAGTTCTTCTGCTTC
GTGAATGCTGGTCGCTATACTGGATCAGCGCTTTGTAAAGCATTAAAGCGTCATGGATTGCAAAATACACATAATATATCACTTGTGATAGTGAGAAATGGAATGAAGTGGTTTAAGATGCTCTTTTACCAATAAACATATTGCGCCTATCAAATCATTTTCCACCCCTGTTAACTGATACAGATATAGCCTTACATATAACTTATGACTACAGCTAGTTCTTCTGCTTC
GTGAATGCTGGTCGCTATACTGGATCGCGCTTTGTAAAGCATTAAAGCGTCATGGATTGCAAAATACACATAATATATCACTTGTGATAGTGAGAAATGGAATGAAGTGGTTTAAGATGCTCTTTTACCAATAAACATATTGCGCCTATCAAATCATTTTCCACCCCTGTTAACTGATACAGATATAGCCTTACATATAACTTTATGACTACAGCTAGTTCTTCTGCTTC
GTGAATGCTGGTCGCTATACTGGATCCGCTTTGTAAAGCATTAAAGCGTCATGGATTGCAAAATACACATAATATATCACTTGTGATAGTGAGAAATGGAATGAAGTGGTTTAAGATGCTCTTTTACCAATAAACATATTGCGCCTATCAAATCATTTTCCACCCCTGTTAACTGATACAGATATAGCCTTACATATAACTTTTATGACTACAGCTAGTTCTTCTGCTTC
GTGAATGCTGGTCGCTATACTGGATCGCTTTGTAAAGCATTAAAGCGTCATGGATTGCAAAATACACATAATATATCACTTGTGATAGTGAGAAATGGAATGAAGTGGTTTAAGATGCTCTTTTACCAATAAACATATTGCGCCTATCAAATCATTTTCCACCCCTGTTAACTGATACAGATATAGCCTTACATATAACTTTTGATGACTACAGCTAGTTCTTCTGCTTC
GTGAATGCTGGTCGCTATACTGGATCCTTTGTAAAGCATTAAAGCGTCATGGATTGCAAAATACACATAATATATCACTTGTGATAGTGAGAAATGGAATGAAGTGGTTTAAGATGCTCTTTTACCAATAAACATATTGCGCCTATCAAATCATTTTCCACCCCTGTTAACTGATACAGATATAGCCTTACATATAACTTTTGCATGACTACAGCTAGTTCTTCTGCTTC
GTGAATGCTGGTCGCTATACTGGATCTTTGTAAAGCATTAAAGCGTCATGGATTGCAAAATACACATAATATATCACTTGTGATAGTGAGAAATGGAATGAAGTGGTTTAAGATGCTCTTTTACCAATAAACATATTGCGCCTATCAAATCATTTTCCACCCCTGTTAACTGATACAGATATAGCCTTACATATAACTTTTGCAATGACTACAGCTAGTTCTTCTGCTTC
GTGAATGCTGGTCGCTATACTGGATCTTGTAAAGCATTAAAGCGTCATGGATTGCAAAATACACATAATATATCACTTGTGATAGTGAGAAATGGAATGAAGTGGTTTAAGATGCTCTTTTACCAATAAACATATTGCGCCTATCAAATCATTTTCCACCCCTGTTAACTGATACAGATATAGCCTTACATATAACTTTTGCACATGACTACAGCTAGTTCTTCTGCTTC
GTGAATGCTGGTCGCTATACTGGATCTGTAAAGCATTAAAGCGTCATGGATTGCAAAATACACATAATATATCACTTGTGATAGTGAGAAATGGAATGAAGTGGTTTAAGATGCTCTTTTACCAATAAACATATTGCGCCTATCAAATCATTTTCCACCCCTGTTAACTGATACAGATATAGCCTTACATATAACTTTTGCACTATGACTACAGCTAGTTCTTCTGCTTC
GTGAATGCTGGTCGCTATACTGGATCGTAAAGCATTAAAGCGTCATGGATTGCAAAATACACATAATATATCACTTGTGATAGTGAGAAATGGAATGAAGTGGTTTAAGATGCTCTTTTACCAATAAACATATTGCGCCTATCAAATCATTTTCCACCCCTGTTAACTGATACAGATATAGCCTTACATATAACTTTTGCACTCATGACTACAGCTAGTTCTTCTGCTTC
GTGAATGCTGGTCGCTATACTGGATCTAAAGCATTAAAGCGTCATGGATTGCAAAATACACATAATATATCACTTGTGATAGTGAGAAATGGAATGAAGTGGTTTAAGATGCTCTTTTACCAATAAACATATTGCGCCTATCAAATCATTTTCCACCCCTGTTAACTGATACAGATATAGCCTTACATATAACTTTTGCACTCCATGACTACAGCTAGTTCTTCTGCTTC
GTGAATGCTGGTCGCTATACTGGATCAAAGCATTAAAGCGTCATGGATTGCAAAATACACATAATATATCACTTGTGATAGTGAGAAATGGAATGAAGTGGTTTAAGATGCTCTTTTACCAATAAACATATTGCGCCTATCAAATCATTTTCCACCCCTGTTAACTGATACAGATATAGCCTTACATATAACTTTTGCACTCCCATGACTACAGCTAGTTCTTCTGCTTC
GTGAATGCTGGTCGCTATACTGGATCAAGCATTAAAGCGTCATGGATTGCAAAATACACATAATATATCACTTGTGATAGTGAGAAATGGAATGAAGTGGTTTAAGATGCTCTTTTACCAATAAACATATTGCGCCTATCAAATCATTTTCCACCCCTGTTAACTGATACAGATATAGCCTTACATATAACTTTTGCACTCCCTATGACTACAGCTAGTTCTTCTGCTTC
GTGAATGCTGGTCGCTATACTGGATCAGCATTAAAGCGTCATGGATTGCAAAATACACATAATATATCACTTGTGATAGTGAGAAATGGAATGAAGTGGTTTAAGATGCTCTTTTACCAATAAACATATTGCGCCTATCAAATCATTTTCCACCCCTGTTAACTGATACAGATATAGCCTTACATATAACTTTTGCACTCCCTAATGACTACAGCTAGTTCTTCTGCTTC
GTGAATGCTGGTCGCTATACTGGATCGCATTAAAGCGTCATGGATTGCAAAATACACATAATATATCACTTGTGATAGTGAGAAATGGAATGAAGTGGTTTAAGATGCTCTTTTACCAATAAACATATTGCGCCTATCAAATCATTTTCCACCCCTGTTAACTGATACAGATATAGCCTTACATATAACTTTTGCACTCCCTAAATGACTACAGCTAGTTCTTCTGCTTC
GTGAATGCTGGTCGCTATACTGGATCCATTAAAGCGTCATGGATTGCAAAATACACATAATATATCACTTGTGATAGTGAGAAATGGAATGAAGTGGTTTAAGATGCTCTTTTACCAATAAACATATTGCGCCTATCAAATCATTTTCCACCCCTGTTAACTGATACAGATATAGCCTTACATATAACTTTTGCACTCCCTAAAATGACTACAGCTAGTTCTTCTGCTTC
GTGAATGCTGGTCGCTATACTGGATCATTAAAGCGTCATGGATTGCAAAATACACATAATATATCACTTGTGATAGTGAGAAATGGAATGAAGTGGTTTAAGATGCTCTTTTACCAATAAACATATTGCGCCTATCAAATCATTTTCCACCCCTGTTAACTGATACAGATATAGCCTTACATATAACTTTTGCACTCCCTAAAAATGACTACAGCTAGTTCTTCTGCTTC
GTGAATGCTGGTCGCTATACTGGATCTTAAAGCGTCATGGATTGCAAAATACACATAATATATCACTTGTGATAGTGAGAAATGGAATGAAGTGGTTTAAGATGCTCTTTTACCAATAAACATATTGCGCCTATCAAATCATTTTCCACCCCTGTTAACTGATACAGATATAGCCTTACATATAACTTTTGCACTCCCTAAAATATGACTACAGCTAGTTCTTCTGCTTC
GTGAATGCTGGTCGCTATACTGGATCTAAAGCGTCATGGATTGCAAAATACACATAATATATCACTTGTGATAGTGAGAAATGGAATGAAGTGGTTTAAGATGCTCTTTTACCAATAAACATATTGCGCCTATCAAATCATTTTCCACCCCTGTTAACTGATACAGATATAGCCTTACATATAACTTTTGCACTCCCTAAAATTATGACTACAGCTAGTTCTTCTGCTTC
GTGAATGCTGGTCGCTATACTGGATCAAAGCGTCATGGATTGCAAAATACACATAATATATCACTTGTGATAGTGAGAAATGGAATGAAGTGGTTTAAGATGCTCTTTTACCAATAAACATATTGCGCCTATCAAATCATTTTCCACCCCTGTTAACTGATACAGATATAGCCTTACATATAACTTTTGCACTCCCTAAAATTAATGACTACAGCTAGTTCTTCTGCTTC
GTGAATGCTGGTCGCTATACTGGATCAAGCGTCATGGATTGCAAAATACACATAATATATCACTTGTGATAGTGAGAAATGGAATGAAGTGGTTTAAGATGCTCTTTTACCAATAAACATATTGCGCCTATCAAATCATTTTCCACCCCTGTTAACTGATACAGATATAGCCTTACATATAACTTTTGCACTCCCTAAAATTACATGACTACAGCTAGTTCTTCTGCTTC
GTGAATGCTGGTCGCTATACTGGATCAGCGTCATGGATTGCAAAATACACATAATATATCACTTGTGATAGTGAGAAATGGAATGAAGTGGTTTAAGATGCTCTTTTACCAATAAACATATTGCGCCTATCAAATCATTTTCCACCCCTGTTAACTGATACAGATATAGCCTTACATATAACTTTTGCACTCCCTAAAATTACCATGACTACAGCTAGTTCTTCTGCTTC
GTGAATGCTGGTCGCTATACTGGATCGCGTCATGGATTGCAAAATACACATAATATATCACTTGTGATAGTGAGAAATGGAATGAAGTGGTTTAAGATGCTCTTTTACCAATAAACATATTGCGCCTATCAAATCATTTTCCACCCCTGTTAACTGATACAGATATAGCCTTACATATAACTTTTGCACTCCCTAAAATTACCAATGACTACAGCTAGTTCTTCTGCTTC
GTGAATGCTGGTCGCTATACTGGATCCGTCATGGATTGCAAAATACACATAATATATCACTTGTGATAGTGAGAAATGGAATGAAGTGGTTTAAGATGCTCTTTTACCAATAAACATATTGCGCCTATCAAATCATTTTCCACCCCTGTTAACTGATACAGATATAGCCTTACATATAACTTTTGCACTCCCTAAAATTACCATATGACTACAGCTAGTTCTTCTGCTTC
GTGAATGCTGGTCGCTATACTGGATCGTCATGGATTGCAAAATACACATAATATATCACTTGTGATAGTGAGAAATGGAATGAAGTGGTTTAAGATGCTCTTTTACCAATAAACATATTGCGCCTATCAAATCATTTTCCACCCCTGTTAACTGATACAGATATAGCCTTACATATAACTTTTGCACTCCCTAAAATTACCATGATGACTACAGCTAGTTCTTCTGCTTC
GTGAATGCTGGTCGCTATACTGGATCTCATGGATTGCAAAATACACATAATATATCACTTGTGATAGTGAGAAATGGAATGAAGTGGTTTAAGATGCTCTTTTACCAATAAACATATTGCGCCTATCAAATCATTTTCCACCCCTGTTAACTGATACAGATATAGCCTTACATATAACTTTTGCACTCCCTAAAATTACCATGGATGACTACAGCTAGTTCTTCTGCTTC
GTGAATGCTGGTCGCTATACTGGATCCATGGATTGCAAAATACACATAATATATCACTTGTGATAGTGAGAAATGGAATGAAGTGGTTTAAGATGCTCTTTTACCAATAAACATATTGCGCCTATCAAATCATTTTCCACCCCTGTTAACTGATACAGATATAGCCTTACATATAACTTTTGCACTCCCTAAAATTACCATGGCATGACTACAGCTAGTTCTTCTGCTTC
GTGAATGCTGGTCGCTATACTGGATCATGGATTGCAAAATACACATAATATATCACTTGTGATAGTGAGAAATGGAATGAAGTGGTTTAAGATGCTCTTTTACCAATAAACATATTGCGCCTATCAAATCATTTTCCACCCCTGTTAACTGATACAGATATAGCCTTACATATAACTTTTGCACTCCCTAAAATTACCATGGCTATGACTACAGCTAGTTCTTCTGCTTC
GTGAATGCTGGTCGCTATACTGGATCTGGATTGCAAAATACACATAATATATCACTTGTGATAGTGAGAAATGGAATGAAGTGGTTTAAGATGCTCTTTTACCAATAAACATATTGCGCCTATCAAATCATTTTCCACCCCTGTTAACTGATACAGATATAGCCTTACATATAACTTTTGCACTCCCTAAAATTACCATGGCTGATGACTACAGCTAGTTCTTCTGCTTC
GTGAATGCTGGTCGCTATACTGGATCGGATTGCAAAATACACATAATATATCACTTGTGATAGTGAGAAATGGAATGAAGTGGTTTAAGATGCTCTTTTACCAATAAACATATTGCGCCTATCAAATCATTTTCCACCCCTGTTAACTGATACAGATATAGCCTTACATATAACTTTTGCACTCCCTAAAATTACCATGGCTGTATGACTACAGCTAGTTCTTCTGCTTC
GTGAATGCTGGTCGCTATACTGGATCGATTGCAAAATACACATAATATATCACTTGTGATAGTGAGAAATGGAATGAAGTGGTTTAAGATGCTCTTTTACCAATAAACATATTGCGCCTATCAAATCATTTTCCACCCCTGTTAACTGATACAGATATAGCCTTACATATAACTTTTGCACTCCCTAAAATTACCATGGCTGTTATGACTACAGCTAGTTCTTCTGCTTC
GTGAATGCTGGTCGCTATACTGGATCATTGCAAAATACACATAATATATCACTTGTGATAGTGAGAAATGGAATGAAGTGGTTTAAGATGCTCTTTTACCAATAAACATATTGCGCCTATCAAATCATTTTCCACCCCTGTTAACTGATACAGATATAGCCTTACATATAACTTTTGCACTCCCTAAAATTACCATGGCTGTTCATGACTACAGCTAGTTCTTCTGCTTC
GTGAATGCTGGTCGCTATACTGGATCTTGCAAAATACACATAATATATCACTTGTGATAGTGAGAAATGGAATGAAGTGGTTTAAGATGCTCTTTTACCAATAAACATATTGCGCCTATCAAATCATTTTCCACCCCTGTTAACTGATACAGATATAGCCTTACATATAACTTTTGCACTCCCTAAAATTACCATGGCTGTTCAATGACTACAGCTAGTTCTTCTGCTTC
GTGAATGCTGGTCGCTATACTGGATCTGCAAAATACACATAATATATCACTTGTGATAGTGAGAAATGGAATGAAGTGGTTTAAGATGCTCTTTTACCAATAAACATATTGCGCCTATCAAATCATTTTCCACCCCTGTTAACTGATACAGATATAGCCTTACATATAACTTTTGCACTCCCTAAAATTACCATGGCTGTTCACATGACTACAGCTAGTTCTTCTGCTTC
GTGAATGCTGGTCGCTATACTGGATCGCAAAATACACATAATATATCACTTGTGATAGTGAGAAATGGAATGAAGTGGTTTAAGATGCTCTTTTACCAATAAACATATTGCGCCTATCAAATCATTTTCCACCCCTGTTAACTGATACAGATATAGCCTTACATATAACTTTTGCACTCCCTAAAATTACCATGGCTGTTCACCATGACTACAGCTAGTTCTTCTGCTTC
GTGAATGCTGGTCGCTATACTGGATCCAAAATACACATAATATATCACTTGTGATAGTGAGAAATGGAATGAAGTGGTTTAAGATGCTCTTTTACCAATAAACATATTGCGCCTATCAAATCATTTTCCACCCCTGTTAACTGATACAGATATAGCCTTACATATAACTTTTGCACTCCCTAAAATTACCATGGCTGTTCACCGATGACTACAGCTAGTTCTTCTGCTTC
GTGAATGCTGGTCGCTATACTGGATCAAAATACACATAATATATCACTTGTGATAGTGAGAAATGGAATGAAGTGGTTTAAGATGCTCTTTTACCAATAAACATATTGCGCCTATCAAATCATTTTCCACCCCTGTTAACTGATACAGATATAGCCTTACATATAACTTTTGCACTCCCTAAAATTACCATGGCTGTTCACCGCATGACTACAGCTAGTTCTTCTGCTTC
GTGAATGCTGGTCGCTATACTGGATCAAATACACATAATATATCACTTGTGATAGTGAGAAATGGAATGAAGTGGTTTAAGATGCTCTTTTACCAATAAACATATTGCGCCTATCAAATCATTTTCCACCCCTGTTAACTGATACAGATATAGCCTTACATATAACTTTTGCACTCCCTAAAATTACCATGGCTGTTCACCGCCATGACTACAGCTAGTTCTTCTGCTTC
GTGAATGCTGGTCGCTATACTGGATCAATACACATAATATATCACTTGTGATAGTGAGAAATGGAATGAAGTGGTTTAAGATGCTCTTTTACCAATAAACATATTGCGCCTATCAAATCATTTTCCACCCCTGTTAACTGATACAGATATAGCCTTACATATAACTTTTGCACTCCCTAAAATTACCATGGCTGTTCACCGCCTATGACTACAGCTAGTTCTTCTGCTTC
GTGAATGCTGGTCGCTATACTGGATCATACACATAATATATCACTTGTGATAGTGAGAAATGGAATGAAGTGGTTTAAGATGCTCTTTTACCAATAAACATATTGCGCCTATCAAATCATTTTCCACCCCTGTTAACTGATACAGATATAGCCTTACATATAACTTTTGCACTCCCTAAAATTACCATGGCTGTTCACCGCCTGATGACTACAGCTAGTTCTTCTGCTTC
GTGAATGCTGGTCGCTATACTGGATCTACACATAATATATCACTTGTGATAGTGAGAAATGGAATGAAGTGGTTTAAGATGCTCTTTTACCAATAAACATATTGCGCCTATCAAATCATTTTCCACCCCTGTTAACTGATACAGATATAGCCTTACATATAACTTTTGCACTCCCTAAAATTACCATGGCTGTTCACCGCCTGCATGACTACAGCTAGTTCTTCTGCTTC
GTGAATGCTGGTCGCTATACTGGATCACACATAATATATCACTTGTGATAGTGAGAAATGGAATGAAGTGGTTTAAGATGCTCTTTTACCAATAAACATATTGCGCCTATCAAATCATTTTCCACCCCTGTTAACTGATACAGATATAGCCTTACATATAACTTTTGCACTCCCTAAAATTACCATGGCTGTTCACCGCCTGCTATGACTACAGCTAGTTCTTCTGCTTC
GTGAATGCTGGTCGCTATACTGGATCCACATAATATATCACTTGTGATAGTGAGAAATGGAATGAAGTGGTTTAAGATGCTCTTTTACCAATAAACATATTGCGCCTATCAAATCATTTTCCACCCCTGTTAACTGATACAGATATAGCCTTACATATAACTTTTGCACTCCCTAAAATTACCATGGCTGTTCACCGCCTGCTAATGACTACAGCTAGTTCTTCTGCTTC
GTGAATGCTGGTCGCTATACTGGATCACATAATATATCACTTGTGATAGTGAGAAATGGAATGAAGTGGTTTAAGATGCTCTTTTACCAATAAACATATTGCGCCTATCAAATCATTTTCCACCCCTGTTAACTGATACAGATATAGCCTTACATATAACTTTTGCACTCCCTAAAATTACCATGGCTGTTCACCGCCTGCTATATGACTACAGCTAGTTCTTCTGCTTC
GTGAATGCTGGTCGCTATACTGGATCCATAATATATCACTTGTGATAGTGAGAAATGGAATGAAGTGGTTTAAGATGCTCTTTTACCAATAAACATATTGCGCCTATCAAATCATTTTCCACCCCTGTTAACTGATACAGATATAGCCTTACATATAACTTTTGCACTCCCTAAAATTACCATGGCTGTTCACCGCCTGCTATCATGACTACAGCTAGTTCTTCTGCTTC
GTGAATGCTGGTCGCTATACTGGATCATAATATATCACTTGTGATAGTGAGAAATGGAATGAAGTGGTTTAAGATGCTCTTTTACCAATAAACATATTGCGCCTATCAAATCATTTTCCACCCCTGTTAACTGATACAGATATAGCCTTACATATAACTTTTGCACTCCCTAAAATTACCATGGCTGTTCACCGCCTGCTATCAATGACTACAGCTAGTTCTTCTGCTTC
GTGAATGCTGGTCGCTATACTGGATCTAATATATCACTTGTGATAGTGAGAAATGGAATGAAGTGGTTTAAGATGCTCTTTTACCAATAAACATATTGCGCCTATCAAATCATTTTCCACCCCTGTTAACTGATACAGATATAGCCTTACATATAACTTTTGCACTCCCTAAAATTACCATGGCTGTTCACCGCCTGCTATCATATGACTACAGCTAGTTCTTCTGCTTC
GTGAATGCTGGTCGCTATACTGGATCAATATATCACTTGTGATAGTGAGAAATGGAATGAAGTGGTTTAAGATGCTCTTTTACCAATAAACATATTGCGCCTATCAAATCATTTTCCACCCCTGTTAACTGATACAGATATAGCCTTACATATAACTTTTGCACTCCCTAAAATTACCATGGCTGTTCACCGCCTGCTATCATCATGACTACAGCTAGTTCTTCTGCTTC
GTGAATGCTGGTCGCTATACTGGATCATATATCACTTGTGATAGTGAGAAATGGAATGAAGTGGTTTAAGATGCTCTTTTACCAATAAACATATTGCGCCTATCAAATCATTTTCCACCCCTGTTAACTGATACAGATATAGCCTTACATATAACTTTTGCACTCCCTAAAATTACCATGGCTGTTCACCGCCTGCTATCATCCATGACTACAGCTAGTTCTTCTGCTTC
GTGAATGCTGGTCGCTATACTGGATCTATATCACTTGTGATAGTGAGAAATGGAATGAAGTGGTTTAAGATGCTCTTTTACCAATAAACATATTGCGCCTATCAAATCATTTTCCACCCCTGTTAACTGATACAGATATAGCCTTACATATAACTTTTGCACTCCCTAAAATTACCATGGCTGTTCACCGCCTGCTATCATCCAATGACTACAGCTAGTTCTTCTGCTTC
GTGAATGCTGGTCGCTATACTGGATCATATCACTTGTGATAGTGAGAAATGGAATGAAGTGGTTTAAGATGCTCTTTTACCAATAAACATATTGCGCCTATCAAATCATTTTCCACCCCTGTTAACTGATACAGATATAGCCTTACATATAACTTTTGCACTCCCTAAAATTACCATGGCTGTTCACCGCCTGCTATCATCCATATGACTACAGCTAGTTCTTCTGCTTC
GTGAATGCTGGTCGCTATACTGGATCTATCACTTGTGATAGTGAGAAATGGAATGAAGTGGTTTAAGATGCTCTTTTACCAATAAACATATTGCGCCTATCAAATCATTTTCCACCCCTGTTAACTGATACAGATATAGCCTTACATATAACTTTTGCACTCCCTAAAATTACCATGGCTGTTCACCGCCTGCTATCATCCATGATGACTACAGCTAGTTCTTCTGCTTC
GTGAATGCTGGTCGCTATACTGGATCATCACTTGTGATAGTGAGAAATGGAATGAAGTGGTTTAAGATGCTCTTTTACCAATAAACATATTGCGCCTATCAAATCATTTTCCACCCCTGTTAACTGATACAGATATAGCCTTACATATAACTTTTGCACTCCCTAAAATTACCATGGCTGTTCACCGCCTGCTATCATCCATGTATGACTACAGCTAGTTCTTCTGCTTC
GTGAATGCTGGTCGCTATACTGGATCTCACTTGTGATAGTGAGAAATGGAATGAAGTGGTTTAAGATGCTCTTTTACCAATAAACATATTGCGCCTATCAAATCATTTTCCACCCCTGTTAACTGATACAGATATAGCCTTACATATAACTTTTGCACTCCCTAAAATTACCATGGCTGTTCACCGCCTGCTATCATCCATGTTATGACTACAGCTAGTTCTTCTGCTTC
GTGAATGCTGGTCGCTATACTGGATCCACTTGTGATAGTGAGAAATGGAATGAAGTGGTTTAAGATGCTCTTTTACCAATAAACATATTGCGCCTATCAAATCATTTTCCACCCCTGTTAACTGATACAGATATAGCCTTACATATAACTTTTGCACTCCCTAAAATTACCATGGCTGTTCACCGCCTGCTATCATCCATGTTTATGACTACAGCTAGTTCTTCTGCTTC
GTGAATGCTGGTCGCTATACTGGATCACTTGTGATAGTGAGAAATGGAATGAAGTGGTTTAAGATGCTCTTTTACCAATAAACATATTGCGCCTATCAAATCATTTTCCACCCCTGTTAACTGATACAGATATAGCCTTACATATAACTTTTGCACTCCCTAAAATTACCATGGCTGTTCACCGCCTGCTATCATCCATGTTTTATGACTACAGCTAGTTCTTCTGCTTC
GTGAATGCTGGTCGCTATACTGGATCCTTGTGATAGTGAGAAATGGAATGAAGTGGTTTAAGATGCTCTTTTACCAATAAACATATTGCGCCTATCAAATCATTTTCCACCCCTGTTAACTGATACAGATATAGCCTTACATATAACTTTTGCACTCCCTAAAATTACCATGGCTGTTCACCGCCTGCTATCATCCATGTTTTTATGACTACAGCTAGTTCTTCTGCTTC
GTGAATGCTGGTCGCTATACTGGATCTTGTGATAGTGAGAAATGGAATGAAGTGGTTTAAGATGCTCTTTTACCAATAAACATATTGCGCCTATCAAATCATTTTCCACCCCTGTTAACTGATACAGATATAGCCTTACATATAACTTTTGCACTCCCTAAAATTACCATGGCTGTTCACCGCCTGCTATCATCCATGTTTTTAATGACTACAGCTAGTTCTTCTGCTTC
GTGAATGCTGGTCGCTATACTGGATCTGTGATAGTGAGAAATGGAATGAAGTGGTTTAAGATGCTCTTTTACCAATAAACATATTGCGCCTATCAAATCATTTTCCACCCCTGTTAACTGATACAGATATAGCCTTACATATAACTTTTGCACTCCCTAAAATTACCATGGCTGTTCACCGCCTGCTATCATCCATGTTTTTACATGACTACAGCTAGTTCTTCTGCTTC
GTGAATGCTGGTCGCTATACTGGATCGTGATAGTGAGAAATGGAATGAAGTGGTTTAAGATGCTCTTTTACCAATAAACATATTGCGCCTATCAAATCATTTTCCACCCCTGTTAACTGATACAGATATAGCCTTACATATAACTTTTGCACTCCCTAAAATTACCATGGCTGTTCACCGCCTGCTATCATCCATGTTTTTACAATGACTACAGCTAGTTCTTCTGCTTC
GTGAATGCTGGTCGCTATACTGGATCTGATAGTGAGAAATGGAATGAAGTGGTTTAAGATGCTCTTTTACCAATAAACATATTGCGCCTATCAAATCATTTTCCACCCCTGTTAACTGATACAGATATAGCCTTACATATAACTTTTGCACTCCCTAAAATTACCATGGCTGTTCACCGCCTGCTATCATCCATGTTTTTACATATGACTACAGCTAGTTCTTCTGCTTC
GTGAATGCTGGTCGCTATACTGGATCGATAGTGAGAAATGGAATGAAGTGGTTTAAGATGCTCTTTTACCAATAAACATATTGCGCCTATCAAATCATTTTCCACCCCTGTTAACTGATACAGATATAGCCTTACATATAACTTTTGCACTCCCTAAAATTACCATGGCTGTTCACCGCCTGCTATCATCCATGTTTTTACATAATGACTACAGCTAGTTCTTCTGCTTC
GTGAATGCTGGTCGCTATACTGGATCATAGTGAGAAATGGAATGAAGTGGTTTAAGATGCTCTTTTACCAATAAACATATTGCGCCTATCAAATCATTTTCCACCCCTGTTAACTGATACAGATATAGCCTTACATATAACTTTTGCACTCCCTAAAATTACCATGGCTGTTCACCGCCTGCTATCATCCATGTTTTTACATACATGACTACAGCTAGTTCTTCTGCTTC
GTGAATGCTGGTCGCTATACTGGATCTAGTGAGAAATGGAATGAAGTGGTTTAAGATGCTCTTTTACCAATAAACATATTGCGCCTATCAAATCATTTTCCACCCCTGTTAACTGATACAGATATAGCCTTACATATAACTTTTGCACTCCCTAAAATTACCATGGCTGTTCACCGCCTGCTATCATCCATGTTTTTACATACAATGACTACAGCTAGTTCTTCTGCTTC
GTGAATGCTGGTCGCTATACTGGATCAGTGAGAAATGGAATGAAGTGGTTTAAGATGCTCTTTTACCAATAAACATATTGCGCCTATCAAATCATTTTCCACCCCTGTTAACTGATACAGATATAGCCTTACATATAACTTTTGCACTCCCTAAAATTACCATGGCTGTTCACCGCCTGCTATCATCCATGTTTTTACATACATATGACTACAGCTAGTTCTTCTGCTTC
GTGAATGCTGGTCGCTATACTGGATCGTGAGAAATGGAATGAAGTGGTTTAAGATGCTCTTTTACCAATAAACATATTGCGCCTATCAAATCATTTTCCACCCCTGTTAACTGATACAGATATAGCCTTACATATAACTTTTGCACTCCCTAAAATTACCATGGCTGTTCACCGCCTGCTATCATCCATGTTTTTACATACATCATGACTACAGCTAGTTCTTCTGCTTC
GTGAATGCTGGTCGCTATACTGGATCTGAGAAATGGAATGAAGTGGTTTAAGATGCTCTTTTACCAATAAACATATTGCGCCTATCAAATCATTTTCCACCCCTGTTAACTGATACAGATATAGCCTTACATATAACTTTTGCACTCCCTAAAATTACCATGGCTGTTCACCGCCTGCTATCATCCATGTTTTTACATACATCTATGACTACAGCTAGTTCTTCTGCTTC
GTGAATGCTGGTCGCTATACTGGATCGAGAAATGGAATGAAGTGGTTTAAGATGCTCTTTTACCAATAAACATATTGCGCCTATCAAATCATTTTCCACCCCTGTTAACTGATACAGATATAGCCTTACATATAACTTTTGCACTCCCTAAAATTACCATGGCTGTTCACCGCCTGCTATCATCCATGTTTTTACATACATCTAATGACTACAGCTAGTTCTTCTGCTTC
GTGAATGCTGGTCGCTATACTGGATCAGAAATGGAATGAAGTGGTTTAAGATGCTCTTTTACCAATAAACATATTGCGCCTATCAAATCATTTTCCACCCCTGTTAACTGATACAGATATAGCCTTACATATAACTTTTGCACTCCCTAAAATTACCATGGCTGTTCACCGCCTGCTATCATCCATGTTTTTACATACATCTATATGACTACAGCTAGTTCTTCTGCTTC
GTGAATGCTGGTCGCTATACTGGATCGAAATGGAATGAAGTGGTTTAAGATGCTCTTTTACCAATAAACATATTGCGCCTATCAAATCATTTTCCACCCCTGTTAACTGATACAGATATAGCCTTACATATAACTTTTGCACTCCCTAAAATTACCATGGCTGTTCACCGCCTGCTATCATCCATGTTTTTACATACATCTATTATGACTACAGCTAGTTCTTCTGCTTC
GTGAATGCTGGTCGCTATACTGGATCAAATGGAATGAAGTGGTTTAAGATGCTCTTTTACCAATAAACATATTGCGCCTATCAAATCATTTTCCACCCCTGTTAACTGATACAGATATAGCCTTACATATAACTTTTGCACTCCCTAAAATTACCATGGCTGTTCACCGCCTGCTATCATCCATGTTTTTACATACATCTATTAATGACTACAGCTAGTTCTTCTGCTTC
GTGAATGCTGGTCGCTATACTGGATCAATGGAATGAAGTGGTTTAAGATGCTCTTTTACCAATAAACATATTGCGCCTATCAAATCATTTTCCACCCCTGTTAACTGATACAGATATAGCCTTACATATAACTTTTGCACTCCCTAAAATTACCATGGCTGTTCACCGCCTGCTATCATCCATGTTTTTACATACATCTATTAGATGACTACAGCTAGTTCTTCTGCTTC
GTGAATGCTGGTCGCTATACTGGATCATGGAATGAAGTGGTTTAAGATGCTCTTTTACCAATAAACATATTGCGCCTATCAAATCATTTTCCACCCCTGTTAACTGATACAGATATAGCCTTACATATAACTTTTGCACTCCCTAAAATTACCATGGCTGTTCACCGCCTGCTATCATCCATGTTTTTACATACATCTATTAGGATGACTACAGCTAGTTCTTCTGCTTC
GTGAATGCTGGTCGCTATACTGGATCTGGAATGAAGTGGTTTAAGATGCTCTTTTACCAATAAACATATTGCGCCTATCAAATCATTTTCCACCCCTGTTAACTGATACAGATATAGCCTTACATATAACTTTTGCACTCCCTAAAATTACCATGGCTGTTCACCGCCTGCTATCATCCATGTTTTTACATACATCTATTAGGTATGACTACAGCTAGTTCTTCTGCTTC
GTGAATGCTGGTCGCTATACTGGATCGGAATGAAGTGGTTTAAGATGCTCTTTTACCAATAAACATATTGCGCCTATCAAATCATTTTCCACCCCTGTTAACTGATACAGATATAGCCTTACATATAACTTTTGCACTCCCTAAAATTACCATGGCTGTTCACCGCCTGCTATCATCCATGTTTTTACATACATCTATTAGGTTATGACTACAGCTAGTTCTTCTGCTTC
GTGAATGCTGGTCGCTATACTGGATCGAATGAAGTGGTTTAAGATGCTCTTTTACCAATAAACATATTGCGCCTATCAAATCATTTTCCACCCCTGTTAACTGATACAGATATAGCCTTACATATAACTTTTGCACTCCCTAAAATTACCATGGCTGTTCACCGCCTGCTATCATCCATGTTTTTACATACATCTATTAGGTTTATGACTACAGCTAGTTCTTCTGCTTC
GTGAATGCTGGTCGCTATACTGGATCAATGAAGTGGTTTAAGATGCTCTTTTACCAATAAACATATTGCGCCTATCAAATCATTTTCCACCCCTGTTAACTGATACAGATATAGCCTTACATATAACTTTTGCACTCCCTAAAATTACCATGGCTGTTCACCGCCTGCTATCATCCATGTTTTTACATACATCTATTAGGTTTGATGACTACAGCTAGTTCTTCTGCTTC
GTGAATGCTGGTCGCTATACTGGATCATGAAGTGGTTTAAGATGCTCTTTTACCAATAAACATATTGCGCCTATCAAATCATTTTCCACCCCTGTTAACTGATACAGATATAGCCTTACATATAACTTTTGCACTCCCTAAAATTACCATGGCTGTTCACCGCCTGCTATCATCCATGTTTTTACATACATCTATTAGGTTTGCATGACTACAGCTAGTTCTTCTGCTTC
GTGAATGCTGGTCGCTATACTGGATCTGAAGTGGTTTAAGATGCTCTTTTACCAATAAACATATTGCGCCTATCAAATCATTTTCCACCCCTGTTAACTGATACAGATATAGCCTTACATATAACTTTTGCACTCCCTAAAATTACCATGGCTGTTCACCGCCTGCTATCATCCATGTTTTTACATACATCTATTAGGTTTGCCATGACTACAGCTAGTTCTTCTGCTTC
GTGAATGCTGGTCGCTATACTGGATCGAAGTGGTTTAAGATGCTCTTTTACCAATAAACATATTGCGCCTATCAAATCATTTTCCACCCCTGTTAACTGATACAGATATAGCCTTACATATAACTTTTGCACTCCCTAAAATTACCATGGCTGTTCACCGCCTGCTATCATCCATGTTTTTACATACATCTATTAGGTTTGCCAATGACTACAGCTAGTTCTTCTGCTTC
GTGAATGCTGGTCGCTATACTGGATCAAGTGGTTTAAGATGCTCTTTTACCAATAAACATATTGCGCCTATCAAATCATTTTCCACCCCTGTTAACTGATACAGATATAGCCTTACATATAACTTTTGCACTCCCTAAAATTACCATGGCTGTTCACCGCCTGCTATCATCCATGTTTTTACATACATCTATTAGGTTTGCCATATGACTACAGCTAGTTCTTCTGCTTC
GTGAATGCTGGTCGCTATACTGGATCAGTGGTTTAAGATGCTCTTTTACCAATAAACATATTGCGCCTATCAAATCATTTTCCACCCCTGTTAACTGATACAGATATAGCCTTACATATAACTTTTGCACTCCCTAAAATTACCATGGCTGTTCACCGCCTGCTATCATCCATGTTTTTACATACATCTATTAGGTTTGCCATCATGACTACAGCTAGTTCTTCTGCTTC
GTGAATGCTGGTCGCTATACTGGATCGTGGTTTAAGATGCTCTTTTACCAATAAACATATTGCGCCTATCAAATCATTTTCCACCCCTGTTAACTGATACAGATATAGCCTTACATATAACTTTTGCACTCCCTAAAATTACCATGGCTGTTCACCGCCTGCTATCATCCATGTTTTTACATACATCTATTAGGTTTGCCATCTATGACTACAGCTAGTTCTTCTGCTTC
GTGAATGCTGGTCGCTATACTGGATCTGGTTTAAGATGCTCTTTTACCAATAAACATATTGCGCCTATCAAATCATTTTCCACCCCTGTTAACTGATACAGATATAGCCTTACATATAACTTTTGCACTCCCTAAAATTACCATGGCTGTTCACCGCCTGCTATCATCCATGTTTTTACATACATCTATTAGGTTTGCCATCTTATGACTACAGCTAGTTCTTCTGCTTC
GTGAATGCTGGTCGCTATACTGGATCGGTTTAAGATGCTCTTTTACCAATAAACATATTGCGCCTATCAAATCATTTTCCACCCCTGTTAACTGATACAGATATAGCCTTACATATAACTTTTGCACTCCCTAAAATTACCATGGCTGTTCACCGCCTGCTATCATCCATGTTTTTACATACATCTATTAGGTTTGCCATCTTAATGACTACAGCTAGTTCTTCTGCTTC
GTGAATGCTGGTCGCTATACTGGATCGTTTAAGATGCTCTTTTACCAATAAACATATTGCGCCTATCAAATCATTTTCCACCCCTGTTAACTGATACAGATATAGCCTTACATATAACTTTTGCACTCCCTAAAATTACCATGGCTGTTCACCGCCTGCTATCATCCATGTTTTTACATACATCTATTAGGTTTGCCATCTTAGATGACTACAGCTAGTTCTTCTGCTTC
GTGAATGCTGGTCGCTATACTGGATCTTTAAGATGCTCTTTTACCAATAAACATATTGCGCCTATCAAATCATTTTCCACCCCTGTTAACTGATACAGATATAGCCTTACATATAACTTTTGCACTCCCTAAAATTACCATGGCTGTTCACCGCCTGCTATCATCCATGTTTTTACATACATCTATTAGGTTTGCCATCTTAGCATGACTACAGCTAGTTCTTCTGCTTC
GTGAATGCTGGTCGCTATACTGGATCTTAAGATGCTCTTTTACCAATAAACATATTGCGCCTATCAAATCATTTTCCACCCCTGTTAACTGATACAGATATAGCCTTACATATAACTTTTGCACTCCCTAAAATTACCATGGCTGTTCACCGCCTGCTATCATCCATGTTTTTACATACATCTATTAGGTTTGCCATCTTAGCCATGACTACAGCTAGTTCTTCTGCTTC
GTGAATGCTGGTCGCTATACTGGATCTAAGATGCTCTTTTACCAATAAACATATTGCGCCTATCAAATCATTTTCCACCCCTGTTAACTGATACAGATATAGCCTTACATATAACTTTTGCACTCCCTAAAATTACCATGGCTGTTCACCGCCTGCTATCATCCATGTTTTTACATACATCTATTAGGTTTGCCATCTTAGCCGATGACTACAGCTAGTTCTTCTGCTTC
GTGAATGCTGGTCGCTATACTGGATCAAGATGCTCTTTTACCAATAAACATATTGCGCCTATCAAATCATTTTCCACCCCTGTTAACTGATACAGATATAGCCTTACATATAACTTTTGCACTCCCTAAAATTACCATGGCTGTTCACCGCCTGCTATCATCCATGTTTTTACATACATCTATTAGGTTTGCCATCTTAGCCGCATGACTACAGCTAGTTCTTCTGCTTC
GTGAATGCTGGTCGCTATACTGGATCAGATGCTCTTTTACCAATAAACATATTGCGCCTATCAAATCATTTTCCACCCCTGTTAACTGATACAGATATAGCCTTACATATAACTTTTGCACTCCCTAAAATTACCATGGCTGTTCACCGCCTGCTATCATCCATGTTTTTACATACATCTATTAGGTTTGCCATCTTAGCCGCCATGACTACAGCTAGTTCTTCTGCTTC
GTGAATGCTGGTCGCTATACTGGATCGATGCTCTTTTACCAATAAACATATTGCGCCTATCAAATCATTTTCCACCCCTGTTAACTGATACAGATATAGCCTTACATATAACTTTTGCACTCCCTAAAATTACCATGGCTGTTCACCGCCTGCTATCATCCATGTTTTTACATACATCTATTAGGTTTGCCATCTTAGCCGCCGATGACTACAGCTAGTTCTTCTGCTTC
GTGAATGCTGGTCGCTATACTGGATCATGCTCTTTTACCAATAAACATATTGCGCCTATCAAATCATTTTCCACCCCTGTTAACTGATACAGATATAGCCTTACATATAACTTTTGCACTCCCTAAAATTACCATGGCTGTTCACCGCCTGCTATCATCCATGTTTTTACATACATCTATTAGGTTTGCCATCTTAGCCGCCGAATGACTACAGCTAGTTCTTCTGCTTC
GTGAATGCTGGTCGCTATACTGGATCTGCTCTTTTACCAATAAACATATTGCGCCTATCAAATCATTTTCCACCCCTGTTAACTGATACAGATATAGCCTTACATATAACTTTTGCACTCCCTAAAATTACCATGGCTGTTCACCGCCTGCTATCATCCATGTTTTTACATACATCTATTAGGTTTGCCATCTTAGCCGCCGAAATGACTACAGCTAGTTCTTCTGCTTC
GTGAATGCTGGTCGCTATACTGGATCGCTCTTTTACCAATAAACATATTGCGCCTATCAAATCATTTTCCACCCCTGTTAACTGATACAGATATAGCCTTACATATAACTTTTGCACTCCCTAAAATTACCATGGCTGTTCACCGCCTGCTATCATCCATGTTTTTACATACATCTATTAGGTTTGCCATCTTAGCCGCCGAAGATGACTACAGCTAGTTCTTCTGCTTC
GTGAATGCTGGTCGCTATACTGGATCCTCTTTTACCAATAAACATATTGCGCCTATCAAATCATTTTCCACCCCTGTTAACTGATACAGATATAGCCTTACATATAACTTTTGCACTCCCTAAAATTACCATGGCTGTTCACCGCCTGCTATCATCCATGTTTTTACATACATCTATTAGGTTTGCCATCTTAGCCGCCGAAGCATGACTACAGCTAGTTCTTCTGCTTC
GTGAATGCTGGTCGCTATACTGGATCTCTTTTACCAATAAACATATTGCGCCTATCAAATCATTTTCCACCCCTGTTAACTGATACAGATATAGCCTTACATATAACTTTTGCACTCCCTAAAATTACCATGGCTGTTCACCGCCTGCTATCATCCATGTTTTTACATACATCTATTAGGTTTGCCATCTTAGCCGCCGAAGCTATGACTACAGCTAGTTCTTCTGCTTC
GTGAATGCTGGTCGCTATACTGGATCCTTTTACCAATAAACATATTGCGCCTATCAAATCATTTTCCACCCCTGTTAACTGATACAGATATAGCCTTACATATAACTTTTGCACTCCCTAAAATTACCATGGCTGTTCACCGCCTGCTATCATCCATGTTTTTACATACATCTATTAGGTTTGCCATCTTAGCCGCCGAAGCTAATGACTACAGCTAGTTCTTCTGCTTC
GTGAATGCTGGTCGCTATACTGGATCTTTTACCAATAAACATATTGCGCCTATCAAATCATTTTCCACCCCTGTTAACTGATACAGATATAGCCTTACATATAACTTTTGCACTCCCTAAAATTACCATGGCTGTTCACCGCCTGCTATCATCCATGTTTTTACATACATCTATTAGGTTTGCCATCTTAGCCGCCGAAGCTATATGACTACAGCTAGTTCTTCTGCTTC
GTGAATGCTGGTCGCTATACTGGATCTTTACCAATAAACATATTGCGCCTATCAAATCATTTTCCACCCCTGTTAACTGATACAGATATAGCCTTACATATAACTTTTGCACTCCCTAAAATTACCATGGCTGTTCACCGCCTGCTATCATCCATGTTTTTACATACATCTATTAGGTTTGCCATCTTAGCCGCCGAAGCTATCATGACTACAGCTAGTTCTTCTGCTTC
GTGAATGCTGGTCGCTATACTGGATCTTACCAATAAACATATTGCGCCTATCAAATCATTTTCCACCCCTGTTAACTGATACAGATATAGCCTTACATATAACTTTTGCACTCCCTAAAATTACCATGGCTGTTCACCGCCTGCTATCATCCATGTTTTTACATACATCTATTAGGTTTGCCATCTTAGCCGCCGAAGCTATCGATGACTACAGCTAGTTCTTCTGCTTC
GTGAATGCTGGTCGCTATACTGGATCTACCAATAAACATATTGCGCCTATCAAATCATTTTCCACCCCTGTTAACTGATACAGATATAGCCTTACATATAACTTTTGCACTCCCTAAAATTACCATGGCTGTTCACCGCCTGCTATCATCCATGTTTTTACATACATCTATTAGGTTTGCCATCTTAGCCGCCGAAGCTATCGTATGACTACAGCTAGTTCTTCTGCTTC
GTGAATGCTGGTCGCTATACTGGATCACCAATAAACATATTGCGCCTATCAAATCATTTTCCACCCCTGTTAACTGATACAGATATAGCCTTACATATAACTTTTGCACTCCCTAAAATTACCATGGCTGTTCACCGCCTGCTATCATCCATGTTTTTACATACATCTATTAGGTTTGCCATCTTAGCCGCCGAAGCTATCGTTATGACTACAGCTAGTTCTTCTGCTTC
GTGAATGCTGGTCGCTATACTGGATCCCAATAAACATATTGCGCCTATCAAATCATTTTCCACCCCTGTTAACTGATACAGATATAGCCTTACATATAACTTTTGCACTCCCTAAAATTACCATGGCTGTTCACCGCCTGCTATCATCCATGTTTTTACATACATCTATTAGGTTTGCCATCTTAGCCGCCGAAGCTATCGTTGATGACTACAGCTAGTTCTTCTGCTTC
GTGAATGCTGGTCGCTATACTGGATCCAATAAACATATTGCGCCTATCAAATCATTTTCCACCCCTGTTAACTGATACAGATATAGCCTTACATATAACTTTTGCACTCCCTAAAATTACCATGGCTGTTCACCGCCTGCTATCATCCATGTTTTTACATACATCTATTAGGTTTGCCATCTTAGCCGCCGAAGCTATCGTTGCATGACTACAGCTAGTTCTTCTGCTTC
GTGAATGCTGGTCGCTATACTGGATCAATAAACATATTGCGCCTATCAAATCATTTTCCACCCCTGTTAACTGATACAGATATAGCCTTACATATAACTTTTGCACTCCCTAAAATTACCATGGCTGTTCACCGCCTGCTATCATCCATGTTTTTACATACATCTATTAGGTTTGCCATCTTAGCCGCCGAAGCTATCGTTGCCATGACTACAGCTAGTTCTTCTGCTTC
GTGAATGCTGGTCGCTATACTGGATCATAAACATATTGCGCCTATCAAATCATTTTCCACCCCTGTTAACTGATACAGATATAGCCTTACATATAACTTTTGCACTCCCTAAAATTACCATGGCTGTTCACCGCCTGCTATCATCCATGTTTTTACATACATCTATTAGGTTTGCCATCTTAGCCGCCGAAGCTATCGTTGCCGATGACTACAGCTAGTTCTTCTGCTTC
GTGAATGCTGGTCGCTATACTGGATCTAAACATATTGCGCCTATCAAATCATTTTCCACCCCTGTTAACTGATACAGATATAGCCTTACATATAACTTTTGCACTCCCTAAAATTACCATGGCTGTTCACCGCCTGCTATCATCCATGTTTTTACATACATCTATTAGGTTTGCCATCTTAGCCGCCGAAGCTATCGTTGCCGGATGACTACAGCTAGTTCTTCTGCTTC
GTGAATGCTGGTCGCTATACTGGATCAAACATATTGCGCCTATCAAATCATTTTCCACCCCTGTTAACTGATACAGATATAGCCTTACATATAACTTTTGCACTCCCTAAAATTACCATGGCTGTTCACCGCCTGCTATCATCCATGTTTTTACATACATCTATTAGGTTTGCCATCTTAGCCGCCGAAGCTATCGTTGCCGGTATGACTACAGCTAGTTCTTCTGCTTC
GTGAATGCTGGTCGCTATACTGGATCAACATATTGCGCCTATCAAATCATTTTCCACCCCTGTTAACTGATACAGATATAGCCTTACATATAACTTTTGCACTCCCTAAAATTACCATGGCTGTTCACCGCCTGCTATCATCCATGTTTTTACATACATCTATTAGGTTTGCCATCTTAGCCGCCGAAGCTATCGTTGCCGGTAATGACTACAGCTAGTTCTTCTGCTTC
GTGAATGCTGGTCGCTATACTGGATCACATATTGCGCCTATCAAATCATTTTCCACCCCTGTTAACTGATACAGATATAGCCTTACATATAACTTTTGCACTCCCTAAAATTACCATGGCTGTTCACCGCCTGCTATCATCCATGTTTTTACATACATCTATTAGGTTTGCCATCTTAGCCGCCGAAGCTATCGTTGCCGGTACATGACTACAGCTAGTTCTTCTGCTTC
GTGAATGCTGGTCGCTATACTGGATCCATATTGCGCCTATCAAATCATTTTCCACCCCTGTTAACTGATACAGATATAGCCTTACATATAACTTTTGCACTCCCTAAAATTACCATGGCTGTTCACCGCCTGCTATCATCCATGTTTTTACATACATCTATTAGGTTTGCCATCTTAGCCGCCGAAGCTATCGTTGCCGGTACAATGACTACAGCTAGTTCTTCTGCTTC
GTGAATGCTGGTCGCTATACTGGATCATATTGCGCCTATCAAATCATTTTCCACCCCTGTTAACTGATACAGATATAGCCTTACATATAACTTTTGCACTCCCTAAAATTACCATGGCTGTTCACCGCCTGCTATCATCCATGTTTTTACATACATCTATTAGGTTTGCCATCTTAGCCGCCGAAGCTATCGTTGCCGGTACAGATGACTACAGCTAGTTCTTCTGCTTC
GTGAATGCTGGTCGCTATACTGGATCTATTGCGCCTATCAAATCATTTTCCACCCCTGTTAACTGATACAGATATAGCCTTACATATAACTTTTGCACTCCCTAAAATTACCATGGCTGTTCACCGCCTGCTATCATCCATGTTTTTACATACATCTATTAGGTTTGCCATCTTAGCCGCCGAAGCTATCGTTGCCGGTACAGGATGACTACAGCTAGTTCTTCTGCTTC
GTGAATGCTGGTCGCTATACTGGATCATTGCGCCTATCAAATCATTTTCCACCCCTGTTAACTGATACAGATATAGCCTTACATATAACTTTTGCACTCCCTAAAATTACCATGGCTGTTCACCGCCTGCTATCATCCATGTTTTTACATACATCTATTAGGTTTGCCATCTTAGCCGCCGAAGCTATCGTTGCCGGTACAGGCATGACTACAGCTAGTTCTTCTGCTTC
GTGAATGCTGGTCGCTATACTGGATCTTGCGCCTATCAAATCATTTTCCACCCCTGTTAACTGATACAGATATAGCCTTACATATAACTTTTGCACTCCCTAAAATTACCATGGCTGTTCACCGCCTGCTATCATCCATGTTTTTACATACATCTATTAGGTTTGCCATCTTAGCCGCCGAAGCTATCGTTGCCGGTACAGGCGATGACTACAGCTAGTTCTTCTGCTTC
GTGAATGCTGGTCGCTATACTGGATCTGCGCCTATCAAATCATTTTCCACCCCTGTTAACTGATACAGATATAGCCTTACATATAACTTTTGCACTCCCTAAAATTACCATGGCTGTTCACCGCCTGCTATCATCCATGTTTTTACATACATCTATTAGGTTTGCCATCTTAGCCGCCGAAGCTATCGTTGCCGGTACAGGCGCATGACTACAGCTAGTTCTTCTGCTTC
GTGAATGCTGGTCGCTATACTGGATCGCGCCTATCAAATCATTTTCCACCCCTGTTAACTGATACAGATATAGCCTTACATATAACTTTTGCACTCCCTAAAATTACCATGGCTGTTCACCGCCTGCTATCATCCATGTTTTTACATACATCTATTAGGTTTGCCATCTTAGCCGCCGAAGCTATCGTTGCCGGTACAGGCGCTATGACTACAGCTAGTTCTTCTGCTTC
GTGAATGCTGGTCGCTATACTGGATCCGCCTATCAAATCATTTTCCACCCCTGTTAACTGATACAGATATAGCCTTACATATAACTTTTGCACTCCCTAAAATTACCATGGCTGTTCACCGCCTGCTATCATCCATGTTTTTACATACATCTATTAGGTTTGCCATCTTAGCCGCCGAAGCTATCGTTGCCGGTACAGGCGCTCATGACTACAGCTAGTTCTTCTGCTTC
GTGAATGCTGGTCGCTATACTGGATCGCCTATCAAATCATTTTCCACCCCTGTTAACTGATACAGATATAGCCTTACATATAACTTTTGCACTCCCTAAAATTACCATGGCTGTTCACCGCCTGCTATCATCCATGTTTTTACATACATCTATTAGGTTTGCCATCTTAGCCGCCGAAGCTATCGTTGCCGGTACAGGCGCTCCATGACTACAGCTAGTTCTTCTGCTTC
GTGAATGCTGGTCGCTATACTGGATCCCTATCAAATCATTTTCCACCCCTGTTAACTGATACAGATATAGCCTTACATATAACTTTTGCACTCCCTAAAATTACCATGGCTGTTCACCGCCTGCTATCATCCATGTTTTTACATACATCTATTAGGTTTGCCATCTTAGCCGCCGAAGCTATCGTTGCCGGTACAGGCGCTCCTATGACTACAGCTAGTTCTTCTGCTTC
GTGAATGCTGGTCGCTATACTGGATCCTATCAAATCATTTTCCACCCCTGTTAACTGATACAGATATAGCCTTACATATAACTTTTGCACTCCCTAAAATTACCATGGCTGTTCACCGCCTGCTATCATCCATGTTTTTACATACATCTATTAGGTTTGCCATCTTAGCCGCCGAAGCTATCGTTGCCGGTACAGGCGCTCCTTATGACTACAGCTAGTTCTTCTGCTTC
GTGAATGCTGGTCGCTATACTGGATCTATCAAATCATTTTCCACCCCTGTTAACTGATACAGATATAGCCTTACATATAACTTTTGCACTCCCTAAAATTACCATGGCTGTTCACCGCCTGCTATCATCCATGTTTTTACATACATCTATTAGGTTTGCCATCTTAGCCGCCGAAGCTATCGTTGCCGGTACAGGCGCTCCTTGATGACTACAGCTAGTTCTTCTGCTTC
GTGAATGCTGGTCGCTATACTGGATCATCAAATCATTTTCCACCCCTGTTAACTGATACAGATATAGCCTTACATATAACTTTTGCACTCCCTAAAATTACCATGGCTGTTCACCGCCTGCTATCATCCATGTTTTTACATACATCTATTAGGTTTGCCATCTTAGCCGCCGAAGCTATCGTTGCCGGTACAGGCGCTCCTTGAATGACTACAGCTAGTTCTTCTGCTTC
GTGAATGCTGGTCGCTATACTGGATCTCAAATCATTTTCCACCCCTGTTAACTGATACAGATATAGCCTTACATATAACTTTTGCACTCCCTAAAATTACCATGGCTGTTCACCGCCTGCTATCATCCATGTTTTTACATACATCTATTAGGTTTGCCATCTTAGCCGCCGAAGCTATCGTTGCCGGTACAGGCGCTCCTTGAAATGACTACAGCTAGTTCTTCTGCTTC
GTGAATGCTGGTCGCTATACTGGATCCAAATCATTTTCCACCCCTGTTAACTGATACAGATATAGCCTTACATATAACTTTTGCACTCCCTAAAATTACCATGGCTGTTCACCGCCTGCTATCATCCATGTTTTTACATACATCTATTAGGTTTGCCATCTTAGCCGCCGAAGCTATCGTTGCCGGTACAGGCGCTCCTTGAATATGACTACAGCTAGTTCTTCTGCTTC
GTGAATGCTGGTCGCTATACTGGATCAAATCATTTTCCACCCCTGTTAACTGATACAGATATAGCCTTACATATAACTTTTGCACTCCCTAAAATTACCATGGCTGTTCACCGCCTGCTATCATCCATGTTTTTACATACATCTATTAGGTTTGCCATCTTAGCCGCCGAAGCTATCGTTGCCGGTACAGGCGCTCCTTGAATAATGACTACAGCTAGTTCTTCTGCTTC
GTGAATGCTGGTCGCTATACTGGATCAATCATTTTCCACCCCTGTTAACTGATACAGATATAGCCTTACATATAACTTTTGCACTCCCTAAAATTACCATGGCTGTTCACCGCCTGCTATCATCCATGTTTTTACATACATCTATTAGGTTTGCCATCTTAGCCGCCGAAGCTATCGTTGCCGGTACAGGCGCTCCTTGAATAAATGACTACAGCTAGTTCTTCTGCTTC
GTGAATGCTGGTCGCTATACTGGATCATCATTTTCCACCCCTGTTAACTGATACAGATATAGCCTTACATATAACTTTTGCACTCCCTAAAATTACCATGGCTGTTCACCGCCTGCTATCATCCATGTTTTTACATACATCTATTAGGTTTGCCATCTTAGCCGCCGAAGCTATCGTTGCCGGTACAGGCGCTCCTTGAATAACATGACTACAGCTAGTTCTTCTGCTTC
GTGAATGCTGGTCGCTATACTGGATCTCATTTTCCACCCCTGTTAACTGATACAGATATAGCCTTACATATAACTTTTGCACTCCCTAAAATTACCATGGCTGTTCACCGCCTGCTATCATCCATGTTTTTACATACATCTATTAGGTTTGCCATCTTAGCCGCCGAAGCTATCGTTGCCGGTACAGGCGCTCCTTGAATAACCATGACTACAGCTAGTTCTTCTGCTTC
GTGAATGCTGGTCGCTATACTGGATCCATTTTCCACCCCTGTTAACTGATACAGATATAGCCTTACATATAACTTTTGCACTCCCTAAAATTACCATGGCTGTTCACCGCCTGCTATCATCCATGTTTTTACATACATCTATTAGGTTTGCCATCTTAGCCGCCGAAGCTATCGTTGCCGGTACAGGCGCTCCTTGAATAACCCATGACTACAGCTAGTTCTTCTGCTTC
GTGAATGCTGGTCGCTATACTGGATCATTTTCCACCCCTGTTAACTGATACAGATATAGCCTTACATATAACTTTTGCACTCCCTAAAATTACCATGGCTGTTCACCGCCTGCTATCATCCATGTTTTTACATACATCTATTAGGTTTGCCATCTTAGCCGCCGAAGCTATCGTTGCCGGTACAGGCGCTCCTTGAATAACCCCATGACTACAGCTAGTTCTTCTGCTTC
GTGAATGCTGGTCGCTATACTGGATCTTTTCCACCCCTGTTAACTGATACAGATATAGCCTTACATATAACTTTTGCACTCCCTAAAATTACCATGGCTGTTCACCGCCTGCTATCATCCATGTTTTTACATACATCTATTAGGTTTGCCATCTTAGCCGCCGAAGCTATCGTTGCCGGTACAGGCGCTCCTTGAATAACCCCCATGACTACAGCTAGTTCTTCTGCTTC
GTGAATGCTGGTCGCTATACTGGATCTTTCCACCCCTGTTAACTGATACAGATATAGCCTTACATATAACTTTTGCACTCCCTAAAATTACCATGGCTGTTCACCGCCTGCTATCATCCATGTTTTTACATACATCTATTAGGTTTGCCATCTTAGCCGCCGAAGCTATCGTTGCCGGTACAGGCGCTCCTTGAATAACCCCCTATGACTACAGCTAGTTCTTCTGCTTC
GTGAATGCTGGTCGCTATACTGGATCTTCCACCCCTGTTAACTGATACAGATATAGCCTTACATATAACTTTTGCACTCCCTAAAATTACCATGGCTGTTCACCGCCTGCTATCATCCATGTTTTTACATACATCTATTAGGTTTGCCATCTTAGCCGCCGAAGCTATCGTTGCCGGTACAGGCGCTCCTTGAATAACCCCCTCATGACTACAGCTAGTTCTTCTGCTTC
GTGAATGCTGGTCGCTATACTGGATCTCCACCCCTGTTAACTGATACAGATATAGCCTTACATATAACTTTTGCACTCCCTAAAATTACCATGGCTGTTCACCGCCTGCTATCATCCATGTTTTTACATACATCTATTAGGTTTGCCATCTTAGCCGCCGAAGCTATCGTTGCCGGTACAGGCGCTCCTTGAATAACCCCCTCCATGACTACAGCTAGTTCTTCTGCTTC
GTGAATGCTGGTCGCTATACTGGATCCCACCCCTGTTAACTGATACAGATATAGCCTTACATATAACTTTTGCACTCCCTAAAATTACCATGGCTGTTCACCGCCTGCTATCATCCATGTTTTTACATACATCTATTAGGTTTGCCATCTTAGCCGCCGAAGCTATCGTTGCCGGTACAGGCGCTCCTTGAATAACCCCCTCCCATGACTACAGCTAGTTCTTCTGCTTC
GTGAATGCTGGTCGCTATACTGGATCCACCCCTGTTAACTGATACAGATATAGCCTTACATATAACTTTTGCACTCCCTAAAATTACCATGGCTGTTCACCGCCTGCTATCATCCATGTTTTTACATACATCTATTAGGTTTGCCATCTTAGCCGCCGAAGCTATCGTTGCCGGTACAGGCGCTCCTTGAATAACCCCCTCCCCATGACTACAGCTAGTTCTTCTGCTTC
GTGAATGCTGGTCGCTATACTGGATCACCCCTGTTAACTGATACAGATATAGCCTTACATATAACTTTTGCACTCCCTAAAATTACCATGGCTGTTCACCGCCTGCTATCATCCATGTTTTTACATACATCTATTAGGTTTGCCATCTTAGCCGCCGAAGCTATCGTTGCCGGTACAGGCGCTCCTTGAATAACCCCCTCCCCCATGACTACAGCTAGTTCTTCTGCTTC
GTGAATGCTGGTCGCTATACTGGATCCCCCTGTTAACTGATACAGATATAGCCTTACATATAACTTTTGCACTCCCTAAAATTACCATGGCTGTTCACCGCCTGCTATCATCCATGTTTTTACATACATCTATTAGGTTTGCCATCTTAGCCGCCGAAGCTATCGTTGCCGGTACAGGCGCTCCTTGAATAACCCCCTCCCCCCATGACTACAGCTAGTTCTTCTGCTTC
GTGAATGCTGGTCGCTATACTGGATCCCCTGTTAACTGATACAGATATAGCCTTACATATAACTTTTGCACTCCCTAAAATTACCATGGCTGTTCACCGCCTGCTATCATCCATGTTTTTACATACATCTATTAGGTTTGCCATCTTAGCCGCCGAAGCTATCGTTGCCGGTACAGGCGCTCCTTGAATAACCCCCTCCCCCCCATGACTACAGCTAGTTCTTCTGCTTC
GTGAATGCTGGTCGCTATACTGGATCCCTGTTAACTGATACAGATATAGCCTTACATATAACTTTTGCACTCCCTAAAATTACCATGGCTGTTCACCGCCTGCTATCATCCATGTTTTTACATACATCTATTAGGTTTGCCATCTTAGCCGCCGAAGCTATCGTTGCCGGTACAGGCGCTCCTTGAATAACCCCCTCCCCCCCAATGACTACAGCTAGTTCTTCTGCTTC
GTGAATGCTGGTCGCTATACTGGATCCTGTTAACTGATACAGATATAGCCTTACATATAACTTTTGCACTCCCTAAAATTACCATGGCTGTTCACCGCCTGCTATCATCCATGTTTTTACATACATCTATTAGGTTTGCCATCTTAGCCGCCGAAGCTATCGTTGCCGGTACAGGCGCTCCTTGAATAACCCCCTCCCCCCCACATGACTACAGCTAGTTCTTCTGCTTC
GTGAATGCTGGTCGCTATACTGGATCTGTTAACTGATACAGATATAGCCTTACATATAACTTTTGCACTCCCTAAAATTACCATGGCTGTTCACCGCCTGCTATCATCCATGTTTTTACATACATCTATTAGGTTTGCCATCTTAGCCGCCGAAGCTATCGTTGCCGGTACAGGCGCTCCTTGAATAACCCCCTCCCCCCCACGATGACTACAGCTAGTTCTTCTGCTTC
GTGAATGCTGGTCGCTATACTGGATCGTTAACTGATACAGATATAGCCTTACATATAACTTTTGCACTCCCTAAAATTACCATGGCTGTTCACCGCCTGCTATCATCCATGTTTTTACATACATCTATTAGGTTTGCCATCTTAGCCGCCGAAGCTATCGTTGCCGGTACAGGCGCTCCTTGAATAACCCCCTCCCCCCCACGCATGACTACAGCTAGTTCTTCTGCTTC
GTGAATGCTGGTCGCTATACTGGATCTTAACTGATACAGATATAGCCTTACATATAACTTTTGCACTCCCTAAAATTACCATGGCTGTTCACCGCCTGCTATCATCCATGTTTTTACATACATCTATTAGGTTTGCCATCTTAGCCGCCGAAGCTATCGTTGCCGGTACAGGCGCTCCTTGAATAACCCCCTCCCCCCCACGCTATGACTACAGCTAGTTCTTCTGCTTC
GTGAATGCTGGTCGCTATACTGGATCTAACTGATACAGATATAGCCTTACATATAACTTTTGCACTCCCTAAAATTACCATGGCTGTTCACCGCCTGCTATCATCCATGTTTTTACATACATCTATTAGGTTTGCCATCTTAGCCGCCGAAGCTATCGTTGCCGGTACAGGCGCTCCTTGAATAACCCCCTCCCCCCCACGCTAATGACTACAGCTAGTTCTTCTGCTTC
GTGAATGCTGGTCGCTATACTGGATCAACTGATACAGATATAGCCTTACATATAACTTTTGCACTCCCTAAAATTACCATGGCTGTTCACCGCCTGCTATCATCCATGTTTTTACATACATCTATTAGGTTTGCCATCTTAGCCGCCGAAGCTATCGTTGCCGGTACAGGCGCTCCTTGAATAACCCCCTCCCCCCCACGCTATATGACTACAGCTAGTTCTTCTGCTTC
GTGAATGCTGGTCGCTATACTGGATCACTGATACAGATATAGCCTTACATATAACTTTTGCACTCCCTAAAATTACCATGGCTGTTCACCGCCTGCTATCATCCATGTTTTTACATACATCTATTAGGTTTGCCATCTTAGCCGCCGAAGCTATCGTTGCCGGTACAGGCGCTCCTTGAATAACCCCCTCCCCCCCACGCTATTATGACTACAGCTAGTTCTTCTGCTTC
GTGAATGCTGGTCGCTATACTGGATCCTGATACAGATATAGCCTTACATATAACTTTTGCACTCCCTAAAATTACCATGGCTGTTCACCGCCTGCTATCATCCATGTTTTTACATACATCTATTAGGTTTGCCATCTTAGCCGCCGAAGCTATCGTTGCCGGTACAGGCGCTCCTTGAATAACCCCCTCCCCCCCACGCTATTCATGACTACAGCTAGTTCTTCTGCTTC
GTGAATGCTGGTCGCTATACTGGATCTGATACAGATATAGCCTTACATATAACTTTTGCACTCCCTAAAATTACCATGGCTGTTCACCGCCTGCTATCATCCATGTTTTTACATACATCTATTAGGTTTGCCATCTTAGCCGCCGAAGCTATCGTTGCCGGTACAGGCGCTCCTTGAATAACCCCCTCCCCCCCACGCTATTCTATGACTACAGCTAGTTCTTCTGCTTC
GTGAATGCTGGTCGCTATACTGGATCGATACAGATATAGCCTTACATATAACTTTTGCACTCCCTAAAATTACCATGGCTGTTCACCGCCTGCTATCATCCATGTTTTTACATACATCTATTAGGTTTGCCATCTTAGCCGCCGAAGCTATCGTTGCCGGTACAGGCGCTCCTTGAATAACCCCCTCCCCCCCACGCTATTCTTATGACTACAGCTAGTTCTTCTGCTTC
GTGAATGCTGGTCGCTATACTGGATCATACAGATATAGCCTTACATATAACTTTTGCACTCCCTAAAATTACCATGGCTGTTCACCGCCTGCTATCATCCATGTTTTTACATACATCTATTAGGTTTGCCATCTTAGCCGCCGAAGCTATCGTTGCCGGTACAGGCGCTCCTTGAATAACCCCCTCCCCCCCACGCTATTCTTCATGACTACAGCTAGTTCTTCTGCTTC
GTGAATGCTGGTCGCTATACTGGATCTACAGATATAGCCTTACATATAACTTTTGCACTCCCTAAAATTACCATGGCTGTTCACCGCCTGCTATCATCCATGTTTTTACATACATCTATTAGGTTTGCCATCTTAGCCGCCGAAGCTATCGTTGCCGGTACAGGCGCTCCTTGAATAACCCCCTCCCCCCCACGCTATTCTTCAATGACTACAGCTAGTTCTTCTGCTTC
GTGAATGCTGGTCGCTATACTGGATCACAGATATAGCCTTACATATAACTTTTGCACTCCCTAAAATTACCATGGCTGTTCACCGCCTGCTATCATCCATGTTTTTACATACATCTATTAGGTTTGCCATCTTAGCCGCCGAAGCTATCGTTGCCGGTACAGGCGCTCCTTGAATAACCCCCTCCCCCCCACGCTATTCTTCAAATGACTACAGCTAGTTCTTCTGCTTC
GTGAATGCTGGTCGCTATACTGGATCCAGATATAGCCTTACATATAACTTTTGCACTCCCTAAAATTACCATGGCTGTTCACCGCCTGCTATCATCCATGTTTTTACATACATCTATTAGGTTTGCCATCTTAGCCGCCGAAGCTATCGTTGCCGGTACAGGCGCTCCTTGAATAACCCCCTCCCCCCCACGCTATTCTTCAAAATGACTACAGCTAGTTCTTCTGCTTC
GTGAATGCTGGTCGCTATACTGGATCAGATATAGCCTTACATATAACTTTTGCACTCCCTAAAATTACCATGGCTGTTCACCGCCTGCTATCATCCATGTTTTTACATACATCTATTAGGTTTGCCATCTTAGCCGCCGAAGCTATCGTTGCCGGTACAGGCGCTCCTTGAATAACCCCCTCCCCCCCACGCTATTCTTCAAATATGACTACAGCTAGTTCTTCTGCTTC
GTGAATGCTGGTCGCTATACTGGATCGATATAGCCTTACATATAACTTTTGCACTCCCTAAAATTACCATGGCTGTTCACCGCCTGCTATCATCCATGTTTTTACATACATCTATTAGGTTTGCCATCTTAGCCGCCGAAGCTATCGTTGCCGGTACAGGCGCTCCTTGAATAACCCCCTCCCCCCCACGCTATTCTTCAAATTATGACTACAGCTAGTTCTTCTGCTTC
GTGAATGCTGGTCGCTATACTGGATCATATAGCCTTACATATAACTTTTGCACTCCCTAAAATTACCATGGCTGTTCACCGCCTGCTATCATCCATGTTTTTACATACATCTATTAGGTTTGCCATCTTAGCCGCCGAAGCTATCGTTGCCGGTACAGGCGCTCCTTGAATAACCCCCTCCCCCCCACGCTATTCTTCAAATTCATGACTACAGCTAGTTCTTCTGCTTC
GTGAATGCTGGTCGCTATACTGGATCTATAGCCTTACATATAACTTTTGCACTCCCTAAAATTACCATGGCTGTTCACCGCCTGCTATCATCCATGTTTTTACATACATCTATTAGGTTTGCCATCTTAGCCGCCGAAGCTATCGTTGCCGGTACAGGCGCTCCTTGAATAACCCCCTCCCCCCCACGCTATTCTTCAAATTCCATGACTACAGCTAGTTCTTCTGCTTC
GTGAATGCTGGTCGCTATACTGGATCATAGCCTTACATATAACTTTTGCACTCCCTAAAATTACCATGGCTGTTCACCGCCTGCTATCATCCATGTTTTTACATACATCTATTAGGTTTGCCATCTTAGCCGCCGAAGCTATCGTTGCCGGTACAGGCGCTCCTTGAATAACCCCCTCCCCCCCACGCTATTCTTCAAATTCCGATGACTACAGCTAGTTCTTCTGCTTC
GTGAATGCTGGTCGCTATACTGGATCTAGCCTTACATATAACTTTTGCACTCCCTAAAATTACCATGGCTGTTCACCGCCTGCTATCATCCATGTTTTTACATACATCTATTAGGTTTGCCATCTTAGCCGCCGAAGCTATCGTTGCCGGTACAGGCGCTCCTTGAATAACCCCCTCCCCCCCACGCTATTCTTCAAATTCCGAATGACTACAGCTAGTTCTTCTGCTTC
GTGAATGCTGGTCGCTATACTGGATCAGCCTTACATATAACTTTTGCACTCCCTAAAATTACCATGGCTGTTCACCGCCTGCTATCATCCATGTTTTTACATACATCTATTAGGTTTGCCATCTTAGCCGCCGAAGCTATCGTTGCCGGTACAGGCGCTCCTTGAATAACCCCCTCCCCCCCACGCTATTCTTCAAATTCCGATATGACTACAGCTAGTTCTTCTGCTTC
GTGAATGCTGGTCGCTATACTGGATCGCCTTACATATAACTTTTGCACTCCCTAAAATTACCATGGCTGTTCACCGCCTGCTATCATCCATGTTTTTACATACATCTATTAGGTTTGCCATCTTAGCCGCCGAAGCTATCGTTGCCGGTACAGGCGCTCCTTGAATAACCCCCTCCCCCCCACGCTATTCTTCAAATTCCGATTATGACTACAGCTAGTTCTTCTGCTTC
GTGAATGCTGGTCGCTATACTGGATCCCTTACATATAACTTTTGCACTCCCTAAAATTACCATGGCTGTTCACCGCCTGCTATCATCCATGTTTTTACATACATCTATTAGGTTTGCCATCTTAGCCGCCGAAGCTATCGTTGCCGGTACAGGCGCTCCTTGAATAACCCCCTCCCCCCCACGCTATTCTTCAAATTCCGATTTATGACTACAGCTAGTTCTTCTGCTTC
GTGAATGCTGGTCGCTATACTGGATCCTTACATATAACTTTTGCACTCCCTAAAATTACCATGGCTGTTCACCGCCTGCTATCATCCATGTTTTTACATACATCTATTAGGTTTGCCATCTTAGCCGCCGAAGCTATCGTTGCCGGTACAGGCGCTCCTTGAATAACCCCCTCCCCCCCACGCTATTCTTCAAATTCCGATTTCATGACTACAGCTAGTTCTTCTGCTTC
GTGAATGCTGGTCGCTATACTGGATCTTACATATAACTTTTGCACTCCCTAAAATTACCATGGCTGTTCACCGCCTGCTATCATCCATGTTTTTACATACATCTATTAGGTTTGCCATCTTAGCCGCCGAAGCTATCGTTGCCGGTACAGGCGCTCCTTGAATAACCCCCTCCCCCCCACGCTATTCTTCAAATTCCGATTTCAATGACTACAGCTAGTTCTTCTGCTTC
GTGAATGCTGGTCGCTATACTGGATCTACATATAACTTTTGCACTCCCTAAAATTACCATGGCTGTTCACCGCCTGCTATCATCCATGTTTTTACATACATCTATTAGGTTTGCCATCTTAGCCGCCGAAGCTATCGTTGCCGGTACAGGCGCTCCTTGAATAACCCCCTCCCCCCCACGCTATTCTTCAAATTCCGATTTCAGATGACTACAGCTAGTTCTTCTGCTTC
GTGAATGCTGGTCGCTATACTGGATCACATATAACTTTTGCACTCCCTAAAATTACCATGGCTGTTCACCGCCTGCTATCATCCATGTTTTTACATACATCTATTAGGTTTGCCATCTTAGCCGCCGAAGCTATCGTTGCCGGTACAGGCGCTCCTTGAATAACCCCCTCCCCCCCACGCTATTCTTCAAATTCCGATTTCAGCATGACTACAGCTAGTTCTTCTGCTTC
GTGAATGCTGGTCGCTATACTGGATCCATATAACTTTTGCACTCCCTAAAATTACCATGGCTGTTCACCGCCTGCTATCATCCATGTTTTTACATACATCTATTAGGTTTGCCATCTTAGCCGCCGAAGCTATCGTTGCCGGTACAGGCGCTCCTTGAATAACCCCCTCCCCCCCACGCTATTCTTCAAATTCCGATTTCAGCTATGACTACAGCTAGTTCTTCTGCTTC
GTGAATGCTGGTCGCTATACTGGATCATATAACTTTTGCACTCCCTAAAATTACCATGGCTGTTCACCGCCTGCTATCATCCATGTTTTTACATACATCTATTAGGTTTGCCATCTTAGCCGCCGAAGCTATCGTTGCCGGTACAGGCGCTCCTTGAATAACCCCCTCCCCCCCACGCTATTCTTCAAATTCCGATTTCAGCTTATGACTACAGCTAGTTCTTCTGCTTC
GTGAATGCTGGTCGCTATACTGGATCTATAACTTTTGCACTCCCTAAAATTACCATGGCTGTTCACCGCCTGCTATCATCCATGTTTTTACATACATCTATTAGGTTTGCCATCTTAGCCGCCGAAGCTATCGTTGCCGGTACAGGCGCTCCTTGAATAACCCCCTCCCCCCCACGCTATTCTTCAAATTCCGATTTCAGCTTCATGACTACAGCTAGTTCTTCTGCTTC
GTGAATGCTGGTCGCTATACTGGATCATAACTTTTGCACTCCCTAAAATTACCATGGCTGTTCACCGCCTGCTATCATCCATGTTTTTACATACATCTATTAGGTTTGCCATCTTAGCCGCCGAAGCTATCGTTGCCGGTACAGGCGCTCCTTGAATAACCCCCTCCCCCCCACGCTATTCTTCAAATTCCGATTTCAGCTTCTATGACTACAGCTAGTTCTTCTGCTTC
GTGAATGCTGGTCGCTATACTGGATCTAACTTTTGCACTCCCTAAAATTACCATGGCTGTTCACCGCCTGCTATCATCCATGTTTTTACATACATCTATTAGGTTTGCCATCTTAGCCGCCGAAGCTATCGTTGCCGGTACAGGCGCTCCTTGAATAACCCCCTCCCCCCCACGCTATTCTTCAAATTCCGATTTCAGCTTCTCATGACTACAGCTAGTTCTTCTGCTTC
GTGAATGCTGGTCGCTATACTGGATCAACTTTTGCACTCCCTAAAATTACCATGGCTGTTCACCGCCTGCTATCATCCATGTTTTTACATACATCTATTAGGTTTGCCATCTTAGCCGCCGAAGCTATCGTTGCCGGTACAGGCGCTCCTTGAATAACCCCCTCCCCCCCACGCTATTCTTCAAATTCCGATTTCAGCTTCTCTATGACTACAGCTAGTTCTTCTGCTTC
GTGAATGCTGGTCGCTATACTGGATCACTTTTGCACTCCCTAAAATTACCATGGCTGTTCACCGCCTGCTATCATCCATGTTTTTACATACATCTATTAGGTTTGCCATCTTAGCCGCCGAAGCTATCGTTGCCGGTACAGGCGCTCCTTGAATAACCCCCTCCCCCCCACGCTATTCTTCAAATTCCGATTTCAGCTTCTCTTATGACTACAGCTAGTTCTTCTGCTTC
GTGAATGCTGGTCGCTATACTGGATCCTTTTGCACTCCCTAAAATTACCATGGCTGTTCACCGCCTGCTATCATCCATGTTTTTACATACATCTATTAGGTTTGCCATCTTAGCCGCCGAAGCTATCGTTGCCGGTACAGGCGCTCCTTGAATAACCCCCTCCCCCCCACGCTATTCTTCAAATTCCGATTTCAGCTTCTCTTTATGACTACAGCTAGTTCTTCTGCTTC
GTGAATGCTGGTCGCTATACTGGATCTTTTGCACTCCCTAAAATTACCATGGCTGTTCACCGCCTGCTATCATCCATGTTTTTACATACATCTATTAGGTTTGCCATCTTAGCCGCCGAAGCTATCGTTGCCGGTACAGGCGCTCCTTGAATAACCCCCTCCCCCCCACGCTATTCTTCAAATTCCGATTTCAGCTTCTCTTTGATGACTACAGCTAGTTCTTCTGCTTC
GTGAATGCTGGTCGCTATACTGGATCTTTGCACTCCCTAAAATTACCATGGCTGTTCACCGCCTGCTATCATCCATGTTTTTACATACATCTATTAGGTTTGCCATCTTAGCCGCCGAAGCTATCGTTGCCGGTACAGGCGCTCCTTGAATAACCCCCTCCCCCCCACGCTATTCTTCAAATTCCGATTTCAGCTTCTCTTTGTATGACTACAGCTAGTTCTTCTGCTTC
GTGAATGCTGGTCGCTATACTGGATCTTGCACTCCCTAAAATTACCATGGCTGTTCACCGCCTGCTATCATCCATGTTTTTACATACATCTATTAGGTTTGCCATCTTAGCCGCCGAAGCTATCGTTGCCGGTACAGGCGCTCCTTGAATAACCCCCTCCCCCCCACGCTATTCTTCAAATTCCGATTTCAGCTTCTCTTTGTTATGACTACAGCTAGTTCTTCTGCTTC
GTGAATGCTGGTCGCTATACTGGATCTGCACTCCCTAAAATTACCATGGCTGTTCACCGCCTGCTATCATCCATGTTTTTACATACATCTATTAGGTTTGCCATCTTAGCCGCCGAAGCTATCGTTGCCGGTACAGGCGCTCCTTGAATAACCCCCTCCCCCCCACGCTATTCTTCAAATTCCGATTTCAGCTTCTCTTTGTTTATGACTACAGCTAGTTCTTCTGCTTC
GTGAATGCTGGTCGCTATACTGGATCGCACTCCCTAAAATTACCATGGCTGTTCACCGCCTGCTATCATCCATGTTTTTACATACATCTATTAGGTTTGCCATCTTAGCCGCCGAAGCTATCGTTGCCGGTACAGGCGCTCCTTGAATAACCCCCTCCCCCCCACGCTATTCTTCAAATTCCGATTTCAGCTTCTCTTTGTTTTATGACTACAGCTAGTTCTTCTGCTTC
GTGAATGCTGGTCGCTATACTGGATCCACTCCCTAAAATTACCATGGCTGTTCACCGCCTGCTATCATCCATGTTTTTACATACATCTATTAGGTTTGCCATCTTAGCCGCCGAAGCTATCGTTGCCGGTACAGGCGCTCCTTGAATAACCCCCTCCCCCCCACGCTATTCTTCAAATTCCGATTTCAGCTTCTCTTTGTTTTTATGACTACAGCTAGTTCTTCTGCTTC
GTGAATGCTGGTCGCTATACTGGATCACTCCCTAAAATTACCATGGCTGTTCACCGCCTGCTATCATCCATGTTTTTACATACATCTATTAGGTTTGCCATCTTAGCCGCCGAAGCTATCGTTGCCGGTACAGGCGCTCCTTGAATAACCCCCTCCCCCCCACGCTATTCTTCAAATTCCGATTTCAGCTTCTCTTTGTTTTTCATGACTACAGCTAGTTCTTCTGCTTC
GTGAATGCTGGTCGCTATACTGGATCCTCCCTAAAATTACCATGGCTGTTCACCGCCTGCTATCATCCATGTTTTTACATACATCTATTAGGTTTGCCATCTTAGCCGCCGAAGCTATCGTTGCCGGTACAGGCGCTCCTTGAATAACCCCCTCCCCCCCACGCTATTCTTCAAATTCCGATTTCAGCTTCTCTTTGTTTTTCCATGACTACAGCTAGTTCTTCTGCTTC
GTGAATGCTGGTCGCTATACTGGATCTCCCTAAAATTACCATGGCTGTTCACCGCCTGCTATCATCCATGTTTTTACATACATCTATTAGGTTTGCCATCTTAGCCGCCGAAGCTATCGTTGCCGGTACAGGCGCTCCTTGAATAACCCCCTCCCCCCCACGCTATTCTTCAAATTCCGATTTCAGCTTCTCTTTGTTTTTCCTATGACTACAGCTAGTTCTTCTGCTTC
GTGAATGCTGGTCGCTATACTGGATCCCCTAAAATTACCATGGCTGTTCACCGCCTGCTATCATCCATGTTTTTACATACATCTATTAGGTTTGCCATCTTAGCCGCCGAAGCTATCGTTGCCGGTACAGGCGCTCCTTGAATAACCCCCTCCCCCCCACGCTATTCTTCAAATTCCGATTTCAGCTTCTCTTTGTTTTTCCTTATGACTACAGCTAGTTCTTCTGCTTC
GTGAATGCTGGTCGCTATACTGGATCCCTAAAATTACCATGGCTGTTCACCGCCTGCTATCATCCATGTTTTTACATACATCTATTAGGTTTGCCATCTTAGCCGCCGAAGCTATCGTTGCCGGTACAGGCGCTCCTTGAATAACCCCCTCCCCCCCACGCTATTCTTCAAATTCCGATTTCAGCTTCTCTTTGTTTTTCCTTTATGACTACAGCTAGTTCTTCTGCTTC
GTGAATGCTGGTCGCTATACTGGATCCTAAAATTACCATGGCTGTTCACCGCCTGCTATCATCCATGTTTTTACATACATCTATTAGGTTTGCCATCTTAGCCGCCGAAGCTATCGTTGCCGGTACAGGCGCTCCTTGAATAACCCCCTCCCCCCCACGCTATTCTTCAAATTCCGATTTCAGCTTCTCTTTGTTTTTCCTTTTATGACTACAGCTAGTTCTTCTGCTTC
GTGAATGCTGGTCGCTATACTGGATCTAAAATTACCATGGCTGTTCACCGCCTGCTATCATCCATGTTTTTACATACATCTATTAGGTTTGCCATCTTAGCCGCCGAAGCTATCGTTGCCGGTACAGGCGCTCCTTGAATAACCCCCTCCCCCCCACGCTATTCTTCAAATTCCGATTTCAGCTTCTCTTTGTTTTTCCTTTTTATGACTACAGCTAGTTCTTCTGCTTC
GTGAATGCTGGTCGCTATACTGGATCAAAATTACCATGGCTGTTCACCGCCTGCTATCATCCATGTTTTTACATACATCTATTAGGTTTGCCATCTTAGCCGCCGAAGCTATCGTTGCCGGTACAGGCGCTCCTTGAATAACCCCCTCCCCCCCACGCTATTCTTCAAATTCCGATTTCAGCTTCTCTTTGTTTTTCCTTTTTTATGACTACAGCTAGTTCTTCTGCTTC
GTGAATGCTGGTCGCTATACTGGATCAAATTACCATGGCTGTTCACCGCCTGCTATCATCCATGTTTTTACATACATCTATTAGGTTTGCCATCTTAGCCGCCGAAGCTATCGTTGCCGGTACAGGCGCTCCTTGAATAACCCCCTCCCCCCCACGCTATTCTTCAAATTCCGATTTCAGCTTCTCTTTGTTTTTCCTTTTTTGATGACTACAGCTAGTTCTTCTGCTTC
GTGAATGCTGGTCGCTATACTGGATCAATTACCATGGCTGTTCACCGCCTGCTATCATCCATGTTTTTACATACATCTATTAGGTTTGCCATCTTAGCCGCCGAAGCTATCGTTGCCGGTACAGGCGCTCCTTGAATAACCCCCTCCCCCCCACGCTATTCTTCAAATTCCGATTTCAGCTTCTCTTTGTTTTTCCTTTTTTGGATGACTACAGCTAGTTCTTCTGCTTC
GTGAATGCTGGTCGCTATACTGGATCATTACCATGGCTGTTCACCGCCTGCTATCATCCATGTTTTTACATACATCTATTAGGTTTGCCATCTTAGCCGCCGAAGCTATCGTTGCCGGTACAGGCGCTCCTTGAATAACCCCCTCCCCCCCACGCTATTCTTCAAATTCCGATTTCAGCTTCTCTTTGTTTTTCCTTTTTTGGCATGACTACAGCTAGTTCTTCTGCTTC
GTGAATGCTGGTCGCTATACTGGATCTTACCATGGCTGTTCACCGCCTGCTATCATCCATGTTTTTACATACATCTATTAGGTTTGCCATCTTAGCCGCCGAAGCTATCGTTGCCGGTACAGGCGCTCCTTGAATAACCCCCTCCCCCCCACGCTATTCTTCAAATTCCGATTTCAGCTTCTCTTTGTTTTTCCTTTTTTGGCAATGACTACAGCTAGTTCTTCTGCTTC
GTGAATGCTGGTCGCTATACTGGATCTACCATGGCTGTTCACCGCCTGCTATCATCCATGTTTTTACATACATCTATTAGGTTTGCCATCTTAGCCGCCGAAGCTATCGTTGCCGGTACAGGCGCTCCTTGAATAACCCCCTCCCCCCCACGCTATTCTTCAAATTCCGATTTCAGCTTCTCTTTGTTTTTCCTTTTTTGGCACATGACTACAGCTAGTTCTTCTGCTTC
GTGAATGCTGGTCGCTATACTGGATCACCATGGCTGTTCACCGCCTGCTATCATCCATGTTTTTACATACATCTATTAGGTTTGCCATCTTAGCCGCCGAAGCTATCGTTGCCGGTACAGGCGCTCCTTGAATAACCCCCTCCCCCCCACGCTATTCTTCAAATTCCGATTTCAGCTTCTCTTTGTTTTTCCTTTTTTGGCACCATGACTACAGCTAGTTCTTCTGCTTC
GTGAATGCTGGTCGCTATACTGGATCCCATGGCTGTTCACCGCCTGCTATCATCCATGTTTTTACATACATCTATTAGGTTTGCCATCTTAGCCGCCGAAGCTATCGTTGCCGGTACAGGCGCTCCTTGAATAACCCCCTCCCCCCCACGCTATTCTTCAAATTCCGATTTCAGCTTCTCTTTGTTTTTCCTTTTTTGGCACCTATGACTACAGCTAGTTCTTCTGCTTC
GTGAATGCTGGTCGCTATACTGGATCCATGGCTGTTCACCGCCTGCTATCATCCATGTTTTTACATACATCTATTAGGTTTGCCATCTTAGCCGCCGAAGCTATCGTTGCCGGTACAGGCGCTCCTTGAATAACCCCCTCCCCCCCACGCTATTCTTCAAATTCCGATTTCAGCTTCTCTTTGTTTTTCCTTTTTTGGCACCTCATGACTACAGCTAGTTCTTCTGCTTC
GTGAATGCTGGTCGCTATACTGGATCATGGCTGTTCACCGCCTGCTATCATCCATGTTTTTACATACATCTATTAGGTTTGCCATCTTAGCCGCCGAAGCTATCGTTGCCGGTACAGGCGCTCCTTGAATAACCCCCTCCCCCCCACGCTATTCTTCAAATTCCGATTTCAGCTTCTCTTTGTTTTTCCTTTTTTGGCACCTCGATGACTACAGCTAGTTCTTCTGCTTC
GTGAATGCTGGTCGCTATACTGGATCTGGCTGTTCACCGCCTGCTATCATCCATGTTTTTACATACATCTATTAGGTTTGCCATCTTAGCCGCCGAAGCTATCGTTGCCGGTACAGGCGCTCCTTGAATAACCCCCTCCCCCCCACGCTATTCTTCAAATTCCGATTTCAGCTTCTCTTTGTTTTTCCTTTTTTGGCACCTCGGATGACTACAGCTAGTTCTTCTGCTTC
GTGAATGCTGGTCGCTATACTGGATCGGCTGTTCACCGCCTGCTATCATCCATGTTTTTACATACATCTATTAGGTTTGCCATCTTAGCCGCCGAAGCTATCGTTGCCGGTACAGGCGCTCCTTGAATAACCCCCTCCCCCCCACGCTATTCTTCAAATTCCGATTTCAGCTTCTCTTTGTTTTTCCTTTTTTGGCACCTCGGAATGACTACAGCTAGTTCTTCTGCTTC
GTGAATGCTGGTCGCTATACTGGATCGCTGTTCACCGCCTGCTATCATCCATGTTTTTACATACATCTATTAGGTTTGCCATCTTAGCCGCCGAAGCTATCGTTGCCGGTACAGGCGCTCCTTGAATAACCCCCTCCCCCCCACGCTATTCTTCAAATTCCGATTTCAGCTTCTCTTTGTTTTTCCTTTTTTGGCACCTCGGAAATGACTACAGCTAGTTCTTCTGCTTC
GTGAATGCTGGTCGCTATACTGGATCCTGTTCACCGCCTGCTATCATCCATGTTTTTACATACATCTATTAGGTTTGCCATCTTAGCCGCCGAAGCTATCGTTGCCGGTACAGGCGCTCCTTGAATAACCCCCTCCCCCCCACGCTATTCTTCAAATTCCGATTTCAGCTTCTCTTTGTTTTTCCTTTTTTGGCACCTCGGAAAATGACTACAGCTAGTTCTTCTGCTTC
GTGAATGCTGGTCGCTATACTGGATCTGTTCACCGCCTGCTATCATCCATGTTTTTACATACATCTATTAGGTTTGCCATCTTAGCCGCCGAAGCTATCGTTGCCGGTACAGGCGCTCCTTGAATAACCCCCTCCCCCCCACGCTATTCTTCAAATTCCGATTTCAGCTTCTCTTTGTTTTTCCTTTTTTGGCACCTCGGAAAAATGACTACAGCTAGTTCTTCTGCTTC
GTGAATGCTGGTCGCTATACTGGATCGTTCACCGCCTGCTATCATCCATGTTTTTACATACATCTATTAGGTTTGCCATCTTAGCCGCCGAAGCTATCGTTGCCGGTACAGGCGCTCCTTGAATAACCCCCTCCCCCCCACGCTATTCTTCAAATTCCGATTTCAGCTTCTCTTTGTTTTTCCTTTTTTGGCACCTCGGAAAAAATGACTACAGCTAGTTCTTCTGCTTC
GTGAATGCTGGTCGCTATACTGGATCTTCACCGCCTGCTATCATCCATGTTTTTACATACATCTATTAGGTTTGCCATCTTAGCCGCCGAAGCTATCGTTGCCGGTACAGGCGCTCCTTGAATAACCCCCTCCCCCCCACGCTATTCTTCAAATTCCGATTTCAGCTTCTCTTTGTTTTTCCTTTTTTGGCACCTCGGAAAAACATGACTACAGCTAGTTCTTCTGCTTC
GTGAATGCTGGTCGCTATACTGGATCTCACCGCCTGCTATCATCCATGTTTTTACATACATCTATTAGGTTTGCCATCTTAGCCGCCGAAGCTATCGTTGCCGGTACAGGCGCTCCTTGAATAACCCCCTCCCCCCCACGCTATTCTTCAAATTCCGATTTCAGCTTCTCTTTGTTTTTCCTTTTTTGGCACCTCGGAAAAACCATGACTACAGCTAGTTCTTCTGCTTC
GTGAATGCTGGTCGCTATACTGGATCCACCGCCTGCTATCATCCATGTTTTTACATACATCTATTAGGTTTGCCATCTTAGCCGCCGAAGCTATCGTTGCCGGTACAGGCGCTCCTTGAATAACCCCCTCCCCCCCACGCTATTCTTCAAATTCCGATTTCAGCTTCTCTTTGTTTTTCCTTTTTTGGCACCTCGGAAAAACCTATGACTACAGCTAGTTCTTCTGCTTC
GTGAATGCTGGTCGCTATACTGGATCACCGCCTGCTATCATCCATGTTTTTACATACATCTATTAGGTTTGCCATCTTAGCCGCCGAAGCTATCGTTGCCGGTACAGGCGCTCCTTGAATAACCCCCTCCCCCCCACGCTATTCTTCAAATTCCGATTTCAGCTTCTCTTTGTTTTTCCTTTTTTGGCACCTCGGAAAAACCTCATGACTACAGCTAGTTCTTCTGCTTC
GTGAATGCTGGTCGCTATACTGGATCCCGCCTGCTATCATCCATGTTTTTACATACATCTATTAGGTTTGCCATCTTAGCCGCCGAAGCTATCGTTGCCGGTACAGGCGCTCCTTGAATAACCCCCTCCCCCCCACGCTATTCTTCAAATTCCGATTTCAGCTTCTCTTTGTTTTTCCTTTTTTGGCACCTCGGAAAAACCTCCATGACTACAGCTAGTTCTTCTGCTTC
GTGAATGCTGGTCGCTATACTGGATCCGCCTGCTATCATCCATGTTTTTACATACATCTATTAGGTTTGCCATCTTAGCCGCCGAAGCTATCGTTGCCGGTACAGGCGCTCCTTGAATAACCCCCTCCCCCCCACGCTATTCTTCAAATTCCGATTTCAGCTTCTCTTTGTTTTTCCTTTTTTGGCACCTCGGAAAAACCTCCAATGACTACAGCTAGTTCTTCTGCTTC
GTGAATGCTGGTCGCTATACTGGATCGCCTGCTATCATCCATGTTTTTACATACATCTATTAGGTTTGCCATCTTAGCCGCCGAAGCTATCGTTGCCGGTACAGGCGCTCCTTGAATAACCCCCTCCCCCCCACGCTATTCTTCAAATTCCGATTTCAGCTTCTCTTTGTTTTTCCTTTTTTGGCACCTCGGAAAAACCTCCACATGACTACAGCTAGTTCTTCTGCTTC
GTGAATGCTGGTCGCTATACTGGATCCCTGCTATCATCCATGTTTTTACATACATCTATTAGGTTTGCCATCTTAGCCGCCGAAGCTATCGTTGCCGGTACAGGCGCTCCTTGAATAACCCCCTCCCCCCCACGCTATTCTTCAAATTCCGATTTCAGCTTCTCTTTGTTTTTCCTTTTTTGGCACCTCGGAAAAACCTCCACGATGACTACAGCTAGTTCTTCTGCTTC
GTGAATGCTGGTCGCTATACTGGATCCTGCTATCATCCATGTTTTTACATACATCTATTAGGTTTGCCATCTTAGCCGCCGAAGCTATCGTTGCCGGTACAGGCGCTCCTTGAATAACCCCCTCCCCCCCACGCTATTCTTCAAATTCCGATTTCAGCTTCTCTTTGTTTTTCCTTTTTTGGCACCTCGGAAAAACCTCCACGTATGACTACAGCTAGTTCTTCTGCTTC
GTGAATGCTGGTCGCTATACTGGATCTGCTATCATCCATGTTTTTACATACATCTATTAGGTTTGCCATCTTAGCCGCCGAAGCTATCGTTGCCGGTACAGGCGCTCCTTGAATAACCCCCTCCCCCCCACGCTATTCTTCAAATTCCGATTTCAGCTTCTCTTTGTTTTTCCTTTTTTGGCACCTCGGAAAAACCTCCACGTGATGACTACAGCTAGTTCTTCTGCTTC
GTGAATGCTGGTCGCTATACTGGATCGCTATCATCCATGTTTTTACATACATCTATTAGGTTTGCCATCTTAGCCGCCGAAGCTATCGTTGCCGGTACAGGCGCTCCTTGAATAACCCCCTCCCCCCCACGCTATTCTTCAAATTCCGATTTCAGCTTCTCTTTGTTTTTCCTTTTTTGGCACCTCGGAAAAACCTCCACGTGTATGACTACAGCTAGTTCTTCTGCTTC
GTGAATGCTGGTCGCTATACTGGATCCTATCATCCATGTTTTTACATACATCTATTAGGTTTGCCATCTTAGCCGCCGAAGCTATCGTTGCCGGTACAGGCGCTCCTTGAATAACCCCCTCCCCCCCACGCTATTCTTCAAATTCCGATTTCAGCTTCTCTTTGTTTTTCCTTTTTTGGCACCTCGGAAAAACCTCCACGTGTTATGACTACAGCTAGTTCTTCTGCTTC
GTGAATGCTGGTCGCTATACTGGATCTATCATCCATGTTTTTACATACATCTATTAGGTTTGCCATCTTAGCCGCCGAAGCTATCGTTGCCGGTACAGGCGCTCCTTGAATAACCCCCTCCCCCCCACGCTATTCTTCAAATTCCGATTTCAGCTTCTCTTTGTTTTTCCTTTTTTGGCACCTCGGAAAAACCTCCACGTGTTAATGACTACAGCTAGTTCTTCTGCTTC
GTGAATGCTGGTCGCTATACTGGATCATCATCCATGTTTTTACATACATCTATTAGGTTTGCCATCTTAGCCGCCGAAGCTATCGTTGCCGGTACAGGCGCTCCTTGAATAACCCCCTCCCCCCCACGCTATTCTTCAAATTCCGATTTCAGCTTCTCTTTGTTTTTCCTTTTTTGGCACCTCGGAAAAACCTCCACGTGTTAGATGACTACAGCTAGTTCTTCTGCTTC
GTGAATGCTGGTCGCTATACTGGATCTCATCCATGTTTTTACATACATCTATTAGGTTTGCCATCTTAGCCGCCGAAGCTATCGTTGCCGGTACAGGCGCTCCTTGAATAACCCCCTCCCCCCCACGCTATTCTTCAAATTCCGATTTCAGCTTCTCTTTGTTTTTCCTTTTTTGGCACCTCGGAAAAACCTCCACGTGTTAGGATGACTACAGCTAGTTCTTCTGCTTC
GTGAATGCTGGTCGCTATACTGGATCCATCCATGTTTTTACATACATCTATTAGGTTTGCCATCTTAGCCGCCGAAGCTATCGTTGCCGGTACAGGCGCTCCTTGAATAACCCCCTCCCCCCCACGCTATTCTTCAAATTCCGATTTCAGCTTCTCTTTGTTTTTCCTTTTTTGGCACCTCGGAAAAACCTCCACGTGTTAGGTATGACTACAGCTAGTTCTTCTGCTTC
GTGAATGCTGGTCGCTATACTGGATCATCCATGTTTTTACATACATCTATTAGGTTTGCCATCTTAGCCGCCGAAGCTATCGTTGCCGGTACAGGCGCTCCTTGAATAACCCCCTCCCCCCCACGCTATTCTTCAAATTCCGATTTCAGCTTCTCTTTGTTTTTCCTTTTTTGGCACCTCGGAAAAACCTCCACGTGTTAGGTTATGACTACAGCTAGTTCTTCTGCTTC
GTGAATGCTGGTCGCTATACTGGATCTCCATGTTTTTACATACATCTATTAGGTTTGCCATCTTAGCCGCCGAAGCTATCGTTGCCGGTACAGGCGCTCCTTGAATAACCCCCTCCCCCCCACGCTATTCTTCAAATTCCGATTTCAGCTTCTCTTTGTTTTTCCTTTTTTGGCACCTCGGAAAAACCTCCACGTGTTAGGTTAATGACTACAGCTAGTTCTTCTGCTTC
GTGAATGCTGGTCGCTATACTGGATCCCATGTTTTTACATACATCTATTAGGTTTGCCATCTTAGCCGCCGAAGCTATCGTTGCCGGTACAGGCGCTCCTTGAATAACCCCCTCCCCCCCACGCTATTCTTCAAATTCCGATTTCAGCTTCTCTTTGTTTTTCCTTTTTTGGCACCTCGGAAAAACCTCCACGTGTTAGGTTATATGACTACAGCTAGTTCTTCTGCTTC
GTGAATGCTGGTCGCTATACTGGATCCATGTTTTTACATACATCTATTAGGTTTGCCATCTTAGCCGCCGAAGCTATCGTTGCCGGTACAGGCGCTCCTTGAATAACCCCCTCCCCCCCACGCTATTCTTCAAATTCCGATTTCAGCTTCTCTTTGTTTTTCCTTTTTTGGCACCTCGGAAAAACCTCCACGTGTTAGGTTATTATGACTACAGCTAGTTCTTCTGCTTC
GTGAATGCTGGTCGCTATACTGGATCATGTTTTTACATACATCTATTAGGTTTGCCATCTTAGCCGCCGAAGCTATCGTTGCCGGTACAGGCGCTCCTTGAATAACCCCCTCCCCCCCACGCTATTCTTCAAATTCCGATTTCAGCTTCTCTTTGTTTTTCCTTTTTTGGCACCTCGGAAAAACCTCCACGTGTTAGGTTATTCATGACTACAGCTAGTTCTTCTGCTTC
GTGAATGCTGGTCGCTATACTGGATCTGTTTTTACATACATCTATTAGGTTTGCCATCTTAGCCGCCGAAGCTATCGTTGCCGGTACAGGCGCTCCTTGAATAACCCCCTCCCCCCCACGCTATTCTTCAAATTCCGATTTCAGCTTCTCTTTGTTTTTCCTTTTTTGGCACCTCGGAAAAACCTCCACGTGTTAGGTTATTCCATGACTACAGCTAGTTCTTCTGCTTC
GTGAATGCTGGTCGCTATACTGGATCGTTTTTACATACATCTATTAGGTTTGCCATCTTAGCCGCCGAAGCTATCGTTGCCGGTACAGGCGCTCCTTGAATAACCCCCTCCCCCCCACGCTATTCTTCAAATTCCGATTTCAGCTTCTCTTTGTTTTTCCTTTTTTGGCACCTCGGAAAAACCTCCACGTGTTAGGTTATTCCGATGACTACAGCTAGTTCTTCTGCTTC
GTGAATGCTGGTCGCTATACTGGATCTTTTTACATACATCTATTAGGTTTGCCATCTTAGCCGCCGAAGCTATCGTTGCCGGTACAGGCGCTCCTTGAATAACCCCCTCCCCCCCACGCTATTCTTCAAATTCCGATTTCAGCTTCTCTTTGTTTTTCCTTTTTTGGCACCTCGGAAAAACCTCCACGTGTTAGGTTATTCCGCATGACTACAGCTAGTTCTTCTGCTTC
GTGAATGCTGGTCGCTATACTGGATCTTTTACATACATCTATTAGGTTTGCCATCTTAGCCGCCGAAGCTATCGTTGCCGGTACAGGCGCTCCTTGAATAACCCCCTCCCCCCCACGCTATTCTTCAAATTCCGATTTCAGCTTCTCTTTGTTTTTCCTTTTTTGGCACCTCGGAAAAACCTCCACGTGTTAGGTTATTCCGCCATGACTACAGCTAGTTCTTCTGCTTC
GTGAATGCTGGTCGCTATACTGGATCTTTACATACATCTATTAGGTTTGCCATCTTAGCCGCCGAAGCTATCGTTGCCGGTACAGGCGCTCCTTGAATAACCCCCTCCCCCCCACGCTATTCTTCAAATTCCGATTTCAGCTTCTCTTTGTTTTTCCTTTTTTGGCACCTCGGAAAAACCTCCACGTGTTAGGTTATTCCGCCGATGACTACAGCTAGTTCTTCTGCTTC
GTGAATGCTGGTCGCTATACTGGATCTTACATACATCTATTAGGTTTGCCATCTTAGCCGCCGAAGCTATCGTTGCCGGTACAGGCGCTCCTTGAATAACCCCCTCCCCCCCACGCTATTCTTCAAATTCCGATTTCAGCTTCTCTTTGTTTTTCCTTTTTTGGCACCTCGGAAAAACCTCCACGTGTTAGGTTATTCCGCCGAATGACTACAGCTAGTTCTTCTGCTTC
GTGAATGCTGGTCGCTATACTGGATCTACATACATCTATTAGGTTTGCCATCTTAGCCGCCGAAGCTATCGTTGCCGGTACAGGCGCTCCTTGAATAACCCCCTCCCCCCCACGCTATTCTTCAAATTCCGATTTCAGCTTCTCTTTGTTTTTCCTTTTTTGGCACCTCGGAAAAACCTCCACGTGTTAGGTTATTCCGCCGATATGACTACAGCTAGTTCTTCTGCTTC
GTGAATGCTGGTCGCTATACTGGATCACATACATCTATTAGGTTTGCCATCTTAGCCGCCGAAGCTATCGTTGCCGGTACAGGCGCTCCTTGAATAACCCCCTCCCCCCCACGCTATTCTTCAAATTCCGATTTCAGCTTCTCTTTGTTTTTCCTTTTTTGGCACCTCGGAAAAACCTCCACGTGTTAGGTTATTCCGCCGATTATGACTACAGCTAGTTCTTCTGCTTC
GTGAATGCTGGTCGCTATACTGGATCCATACATCTATTAGGTTTGCCATCTTAGCCGCCGAAGCTATCGTTGCCGGTACAGGCGCTCCTTGAATAACCCCCTCCCCCCCACGCTATTCTTCAAATTCCGATTTCAGCTTCTCTTTGTTTTTCCTTTTTTGGCACCTCGGAAAAACCTCCACGTGTTAGGTTATTCCGCCGATTCATGACTACAGCTAGTTCTTCTGCTTC
GTGAATGCTGGTCGCTATACTGGATCATACATCTATTAGGTTTGCCATCTTAGCCGCCGAAGCTATCGTTGCCGGTACAGGCGCTCCTTGAATAACCCCCTCCCCCCCACGCTATTCTTCAAATTCCGATTTCAGCTTCTCTTTGTTTTTCCTTTTTTGGCACCTCGGAAAAACCTCCACGTGTTAGGTTATTCCGCCGATTCCATGACTACAGCTAGTTCTTCTGCTTC
GTGAATGCTGGTCGCTATACTGGATCTACATCTATTAGGTTTGCCATCTTAGCCGCCGAAGCTATCGTTGCCGGTACAGGCGCTCCTTGAATAACCCCCTCCCCCCCACGCTATTCTTCAAATTCCGATTTCAGCTTCTCTTTGTTTTTCCTTTTTTGGCACCTCGGAAAAACCTCCACGTGTTAGGTTATTCCGCCGATTCCAATGACTACAGCTAGTTCTTCTGCTTC
GTGAATGCTGGTCGCTATACTGGATCACATCTATTAGGTTTGCCATCTTAGCCGCCGAAGCTATCGTTGCCGGTACAGGCGCTCCTTGAATAACCCCCTCCCCCCCACGCTATTCTTCAAATTCCGATTTCAGCTTCTCTTTGTTTTTCCTTTTTTGGCACCTCGGAAAAACCTCCACGTGTTAGGTTATTCCGCCGATTCCACATGACTACAGCTAGTTCTTCTGCTTC
GTGAATGCTGGTCGCTATACTGGATCCATCTATTAGGTTTGCCATCTTAGCCGCCGAAGCTATCGTTGCCGGTACAGGCGCTCCTTGAATAACCCCCTCCCCCCCACGCTATTCTTCAAATTCCGATTTCAGCTTCTCTTTGTTTTTCCTTTTTTGGCACCTCGGAAAAACCTCCACGTGTTAGGTTATTCCGCCGATTCCACGATGACTACAGCTAGTTCTTCTGCTTC
GTGAATGCTGGTCGCTATACTGGATCATCTATTAGGTTTGCCATCTTAGCCGCCGAAGCTATCGTTGCCGGTACAGGCGCTCCTTGAATAACCCCCTCCCCCCCACGCTATTCTTCAAATTCCGATTTCAGCTTCTCTTTGTTTTTCCTTTTTTGGCACCTCGGAAAAACCTCCACGTGTTAGGTTATTCCGCCGATTCCACGGATGACTACAGCTAGTTCTTCTGCTTC
GTGAATGCTGGTCGCTATACTGGATCTCTATTAGGTTTGCCATCTTAGCCGCCGAAGCTATCGTTGCCGGTACAGGCGCTCCTTGAATAACCCCCTCCCCCCCACGCTATTCTTCAAATTCCGATTTCAGCTTCTCTTTGTTTTTCCTTTTTTGGCACCTCGGAAAAACCTCCACGTGTTAGGTTATTCCGCCGATTCCACGGGATGACTACAGCTAGTTCTTCTGCTTC
GTGAATGCTGGTCGCTATACTGGATCCTATTAGGTTTGCCATCTTAGCCGCCGAAGCTATCGTTGCCGGTACAGGCGCTCCTTGAATAACCCCCTCCCCCCCACGCTATTCTTCAAATTCCGATTTCAGCTTCTCTTTGTTTTTCCTTTTTTGGCACCTCGGAAAAACCTCCACGTGTTAGGTTATTCCGCCGATTCCACGGGTATGACTACAGCTAGTTCTTCTGCTTC
GTGAATGCTGGTCGCTATACTGGATCTATTAGGTTTGCCATCTTAGCCGCCGAAGCTATCGTTGCCGGTACAGGCGCTCCTTGAATAACCCCCTCCCCCCCACGCTATTCTTCAAATTCCGATTTCAGCTTCTCTTTGTTTTTCCTTTTTTGGCACCTCGGAAAAACCTCCACGTGTTAGGTTATTCCGCCGATTCCACGGGTGATGACTACAGCTAGTTCTTCTGCTTC
GTGAATGCTGGTCGCTATACTGGATCATTAGGTTTGCCATCTTAGCCGCCGAAGCTATCGTTGCCGGTACAGGCGCTCCTTGAATAACCCCCTCCCCCCCACGCTATTCTTCAAATTCCGATTTCAGCTTCTCTTTGTTTTTCCTTTTTTGGCACCTCGGAAAAACCTCCACGTGTTAGGTTATTCCGCCGATTCCACGGGTGGATGACTACAGCTAGTTCTTCTGCTTC
GTGAATGCTGGTCGCTATACTGGATCTTAGGTTTGCCATCTTAGCCGCCGAAGCTATCGTTGCCGGTACAGGCGCTCCTTGAATAACCCCCTCCCCCCCACGCTATTCTTCAAATTCCGATTTCAGCTTCTCTTTGTTTTTCCTTTTTTGGCACCTCGGAAAAACCTCCACGTGTTAGGTTATTCCGCCGATTCCACGGGTGGGATGACTACAGCTAGTTCTTCTGCTTC
GTGAATGCTGGTCGCTATACTGGATCTAGGTTTGCCATCTTAGCCGCCGAAGCTATCGTTGCCGGTACAGGCGCTCCTTGAATAACCCCCTCCCCCCCACGCTATTCTTCAAATTCCGATTTCAGCTTCTCTTTGTTTTTCCTTTTTTGGCACCTCGGAAAAACCTCCACGTGTTAGGTTATTCCGCCGATTCCACGGGTGGGGATGACTACAGCTAGTTCTTCTGCTTC
GTGAATGCTGGTCGCTATACTGGATCAGGTTTGCCATCTTAGCCGCCGAAGCTATCGTTGCCGGTACAGGCGCTCCTTGAATAACCCCCTCCCCCCCACGCTATTCTTCAAATTCCGATTTCAGCTTCTCTTTGTTTTTCCTTTTTTGGCACCTCGGAAAAACCTCCACGTGTTAGGTTATTCCGCCGATTCCACGGGTGGGGTATGACTACAGCTAGTTCTTCTGCTTC
GTGAATGCTGGTCGCTATACTGGATCGGTTTGCCATCTTAGCCGCCGAAGCTATCGTTGCCGGTACAGGCGCTCCTTGAATAACCCCCTCCCCCCCACGCTATTCTTCAAATTCCGATTTCAGCTTCTCTTTGTTTTTCCTTTTTTGGCACCTCGGAAAAACCTCCACGTGTTAGGTTATTCCGCCGATTCCACGGGTGGGGTGATGACTACAGCTAGTTCTTCTGCTTC
GTGAATGCTGGTCGCTATACTGGATCGTTTGCCATCTTAGCCGCCGAAGCTATCGTTGCCGGTACAGGCGCTCCTTGAATAACCCCCTCCCCCCCACGCTATTCTTCAAATTCCGATTTCAGCTTCTCTTTGTTTTTCCTTTTTTGGCACCTCGGAAAAACCTCCACGTGTTAGGTTATTCCGCCGATTCCACGGGTGGGGTGCATGACTACAGCTAGTTCTTCTGCTTC
GTGAATGCTGGTCGCTATACTGGATCTTTGCCATCTTAGCCGCCGAAGCTATCGTTGCCGGTACAGGCGCTCCTTGAATAACCCCCTCCCCCCCACGCTATTCTTCAAATTCCGATTTCAGCTTCTCTTTGTTTTTCCTTTTTTGGCACCTCGGAAAAACCTCCACGTGTTAGGTTATTCCGCCGATTCCACGGGTGGGGTGCTATGACTACAGCTAGTTCTTCTGCTTC
GTGAATGCTGGTCGCTATACTGGATCTTGCCATCTTAGCCGCCGAAGCTATCGTTGCCGGTACAGGCGCTCCTTGAATAACCCCCTCCCCCCCACGCTATTCTTCAAATTCCGATTTCAGCTTCTCTTTGTTTTTCCTTTTTTGGCACCTCGGAAAAACCTCCACGTGTTAGGTTATTCCGCCGATTCCACGGGTGGGGTGCTAATGACTACAGCTAGTTCTTCTGCTTC
GTGAATGCTGGTCGCTATACTGGATCTGCCATCTTAGCCGCCGAAGCTATCGTTGCCGGTACAGGCGCTCCTTGAATAACCCCCTCCCCCCCACGCTATTCTTCAAATTCCGATTTCAGCTTCTCTTTGTTTTTCCTTTTTTGGCACCTCGGAAAAACCTCCACGTGTTAGGTTATTCCGCCGATTCCACGGGTGGGGTGCTACATGACTACAGCTAGTTCTTCTGCTTC
GTGAATGCTGGTCGCTATACTGGATCGCCATCTTAGCCGCCGAAGCTATCGTTGCCGGTACAGGCGCTCCTTGAATAACCCCCTCCCCCCCACGCTATTCTTCAAATTCCGATTTCAGCTTCTCTTTGTTTTTCCTTTTTTGGCACCTCGGAAAAACCTCCACGTGTTAGGTTATTCCGCCGATTCCACGGGTGGGGTGCTACCATGACTACAGCTAGTTCTTCTGCTTC
GTGAATGCTGGTCGCTATACTGGATCCCATCTTAGCCGCCGAAGCTATCGTTGCCGGTACAGGCGCTCCTTGAATAACCCCCTCCCCCCCACGCTATTCTTCAAATTCCGATTTCAGCTTCTCTTTGTTTTTCCTTTTTTGGCACCTCGGAAAAACCTCCACGTGTTAGGTTATTCCGCCGATTCCACGGGTGGGGTGCTACCAATGACTACAGCTAGTTCTTCTGCTTC
GTGAATGCTGGTCGCTATACTGGATCCATCTTAGCCGCCGAAGCTATCGTTGCCGGTACAGGCGCTCCTTGAATAACCCCCTCCCCCCCACGCTATTCTTCAAATTCCGATTTCAGCTTCTCTTTGTTTTTCCTTTTTTGGCACCTCGGAAAAACCTCCACGTGTTAGGTTATTCCGCCGATTCCACGGGTGGGGTGCTACCAAATGACTACAGCTAGTTCTTCTGCTTC
GTGAATGCTGGTCGCTATACTGGATCATCTTAGCCGCCGAAGCTATCGTTGCCGGTACAGGCGCTCCTTGAATAACCCCCTCCCCCCCACGCTATTCTTCAAATTCCGATTTCAGCTTCTCTTTGTTTTTCCTTTTTTGGCACCTCGGAAAAACCTCCACGTGTTAGGTTATTCCGCCGATTCCACGGGTGGGGTGCTACCAAGATGACTACAGCTAGTTCTTCTGCTTC
GTGAATGCTGGTCGCTATACTGGATCTCTTAGCCGCCGAAGCTATCGTTGCCGGTACAGGCGCTCCTTGAATAACCCCCTCCCCCCCACGCTATTCTTCAAATTCCGATTTCAGCTTCTCTTTGTTTTTCCTTTTTTGGCACCTCGGAAAAACCTCCACGTGTTAGGTTATTCCGCCGATTCCACGGGTGGGGTGCTACCAAGAATGACTACAGCTAGTTCTTCTGCTTC
GTGAATGCTGGTCGCTATACTGGATCCTTAGCCGCCGAAGCTATCGTTGCCGGTACAGGCGCTCCTTGAATAACCCCCTCCCCCCCACGCTATTCTTCAAATTCCGATTTCAGCTTCTCTTTGTTTTTCCTTTTTTGGCACCTCGGAAAAACCTCCACGTGTTAGGTTATTCCGCCGATTCCACGGGTGGGGTGCTACCAAGACATGACTACAGCTAGTTCTTCTGCTTC
GTGAATGCTGGTCGCTATACTGGATCTTAGCCGCCGAAGCTATCGTTGCCGGTACAGGCGCTCCTTGAATAACCCCCTCCCCCCCACGCTATTCTTCAAATTCCGATTTCAGCTTCTCTTTGTTTTTCCTTTTTTGGCACCTCGGAAAAACCTCCACGTGTTAGGTTATTCCGCCGATTCCACGGGTGGGGTGCTACCAAGACTATGACTACAGCTAGTTCTTCTGCTTC
GTGAATGCTGGTCGCTATACTGGATCTAGCCGCCGAAGCTATCGTTGCCGGTACAGGCGCTCCTTGAATAACCCCCTCCCCCCCACGCTATTCTTCAAATTCCGATTTCAGCTTCTCTTTGTTTTTCCTTTTTTGGCACCTCGGAAAAACCTCCACGTGTTAGGTTATTCCGCCGATTCCACGGGTGGGGTGCTACCAAGACTCATGACTACAGCTAGTTCTTCTGCTTC
GTGAATGCTGGTCGCTATACTGGATCAGCCGCCGAAGCTATCGTTGCCGGTACAGGCGCTCCTTGAATAACCCCCTCCCCCCCACGCTATTCTTCAAATTCCGATTTCAGCTTCTCTTTGTTTTTCCTTTTTTGGCACCTCGGAAAAACCTCCACGTGTTAGGTTATTCCGCCGATTCCACGGGTGGGGTGCTACCAAGACTCCATGACTACAGCTAGTTCTTCTGCTTC
GTGAATGCTGGTCGCTATACTGGATCGCCGCCGAAGCTATCGTTGCCGGTACAGGCGCTCCTTGAATAACCCCCTCCCCCCCACGCTATTCTTCAAATTCCGATTTCAGCTTCTCTTTGTTTTTCCTTTTTTGGCACCTCGGAAAAACCTCCACGTGTTAGGTTATTCCGCCGATTCCACGGGTGGGGTGCTACCAAGACTCCTATGACTACAGCTAGTTCTTCTGCTTC
GTGAATGCTGGTCGCTATACTGGATCCCGCCGAAGCTATCGTTGCCGGTACAGGCGCTCCTTGAATAACCCCCTCCCCCCCACGCTATTCTTCAAATTCCGATTTCAGCTTCTCTTTGTTTTTCCTTTTTTGGCACCTCGGAAAAACCTCCACGTGTTAGGTTATTCCGCCGATTCCACGGGTGGGGTGCTACCAAGACTCCTGATGACTACAGCTAGTTCTTCTGCTTC
GTGAATGCTGGTCGCTATACTGGATCCGCCGAAGCTATCGTTGCCGGTACAGGCGCTCCTTGAATAACCCCCTCCCCCCCACGCTATTCTTCAAATTCCGATTTCAGCTTCTCTTTGTTTTTCCTTTTTTGGCACCTCGGAAAAACCTCCACGTGTTAGGTTATTCCGCCGATTCCACGGGTGGGGTGCTACCAAGACTCCTGAATGACTACAGCTAGTTCTTCTGCTTC
GTGAATGCTGGTCGCTATACTGGATCGCCGAAGCTATCGTTGCCGGTACAGGCGCTCCTTGAATAACCCCCTCCCCCCCACGCTATTCTTCAAATTCCGATTTCAGCTTCTCTTTGTTTTTCCTTTTTTGGCACCTCGGAAAAACCTCCACGTGTTAGGTTATTCCGCCGATTCCACGGGTGGGGTGCTACCAAGACTCCTGAAATGACTACAGCTAGTTCTTCTGCTTC
GTGAATGCTGGTCGCTATACTGGATCCCGAAGCTATCGTTGCCGGTACAGGCGCTCCTTGAATAACCCCCTCCCCCCCACGCTATTCTTCAAATTCCGATTTCAGCTTCTCTTTGTTTTTCCTTTTTTGGCACCTCGGAAAAACCTCCACGTGTTAGGTTATTCCGCCGATTCCACGGGTGGGGTGCTACCAAGACTCCTGAAAATGACTACAGCTAGTTCTTCTGCTTC
GTGAATGCTGGTCGCTATACTGGATCCGAAGCTATCGTTGCCGGTACAGGCGCTCCTTGAATAACCCCCTCCCCCCCACGCTATTCTTCAAATTCCGATTTCAGCTTCTCTTTGTTTTTCCTTTTTTGGCACCTCGGAAAAACCTCCACGTGTTAGGTTATTCCGCCGATTCCACGGGTGGGGTGCTACCAAGACTCCTGAAAAATGACTACAGCTAGTTCTTCTGCTTC
GTGAATGCTGGTCGCTATACTGGATCGAAGCTATCGTTGCCGGTACAGGCGCTCCTTGAATAACCCCCTCCCCCCCACGCTATTCTTCAAATTCCGATTTCAGCTTCTCTTTGTTTTTCCTTTTTTGGCACCTCGGAAAAACCTCCACGTGTTAGGTTATTCCGCCGATTCCACGGGTGGGGTGCTACCAAGACTCCTGAAAAAATGACTACAGCTAGTTCTTCTGCTTC
GTGAATGCTGGTCGCTATACTGGATCAAGCTATCGTTGCCGGTACAGGCGCTCCTTGAATAACCCCCTCCCCCCCACGCTATTCTTCAAATTCCGATTTCAGCTTCTCTTTGTTTTTCCTTTTTTGGCACCTCGGAAAAACCTCCACGTGTTAGGTTATTCCGCCGATTCCACGGGTGGGGTGCTACCAAGACTCCTGAAAAAGATGACTACAGCTAGTTCTTCTGCTTC
GTGAATGCTGGTCGCTATACTGGATCAGCTATCGTTGCCGGTACAGGCGCTCCTTGAATAACCCCCTCCCCCCCACGCTATTCTTCAAATTCCGATTTCAGCTTCTCTTTGTTTTTCCTTTTTTGGCACCTCGGAAAAACCTCCACGTGTTAGGTTATTCCGCCGATTCCACGGGTGGGGTGCTACCAAGACTCCTGAAAAAGAATGACTACAGCTAGTTCTTCTGCTTC
GTGAATGCTGGTCGCTATACTGGATCGCTATCGTTGCCGGTACAGGCGCTCCTTGAATAACCCCCTCCCCCCCACGCTATTCTTCAAATTCCGATTTCAGCTTCTCTTTGTTTTTCCTTTTTTGGCACCTCGGAAAAACCTCCACGTGTTAGGTTATTCCGCCGATTCCACGGGTGGGGTGCTACCAAGACTCCTGAAAAAGAAATGACTACAGCTAGTTCTTCTGCTTC
GTGAATGCTGGTCGCTATACTGGATCCTATCGTTGCCGGTACAGGCGCTCCTTGAATAACCCCCTCCCCCCCACGCTATTCTTCAAATTCCGATTTCAGCTTCTCTTTGTTTTTCCTTTTTTGGCACCTCGGAAAAACCTCCACGTGTTAGGTTATTCCGCCGATTCCACGGGTGGGGTGCTACCAAGACTCCTGAAAAAGAAAATGACTACAGCTAGTTCTTCTGCTTC
GTGAATGCTGGTCGCTATACTGGATCTATCGTTGCCGGTACAGGCGCTCCTTGAATAACCCCCTCCCCCCCACGCTATTCTTCAAATTCCGATTTCAGCTTCTCTTTGTTTTTCCTTTTTTGGCACCTCGGAAAAACCTCCACGTGTTAGGTTATTCCGCCGATTCCACGGGTGGGGTGCTACCAAGACTCCTGAAAAAGAAACATGACTACAGCTAGTTCTTCTGCTTC
GTGAATGCTGGTCGCTATACTGGATCATCGTTGCCGGTACAGGCGCTCCTTGAATAACCCCCTCCCCCCCACGCTATTCTTCAAATTCCGATTTCAGCTTCTCTTTGTTTTTCCTTTTTTGGCACCTCGGAAAAACCTCCACGTGTTAGGTTATTCCGCCGATTCCACGGGTGGGGTGCTACCAAGACTCCTGAAAAAGAAACTATGACTACAGCTAGTTCTTCTGCTTC
GTGAATGCTGGTCGCTATACTGGATCTCGTTGCCGGTACAGGCGCTCCTTGAATAACCCCCTCCCCCCCACGCTATTCTTCAAATTCCGATTTCAGCTTCTCTTTGTTTTTCCTTTTTTGGCACCTCGGAAAAACCTCCACGTGTTAGGTTATTCCGCCGATTCCACGGGTGGGGTGCTACCAAGACTCCTGAAAAAGAAACTGATGACTACAGCTAGTTCTTCTGCTTC
GTGAATGCTGGTCGCTATACTGGATCCGTTGCCGGTACAGGCGCTCCTTGAATAACCCCCTCCCCCCCACGCTATTCTTCAAATTCCGATTTCAGCTTCTCTTTGTTTTTCCTTTTTTGGCACCTCGGAAAAACCTCCACGTGTTAGGTTATTCCGCCGATTCCACGGGTGGGGTGCTACCAAGACTCCTGAAAAAGAAACTGTATGACTACAGCTAGTTCTTCTGCTTC
GTGAATGCTGGTCGCTATACTGGATCGTTGCCGGTACAGGCGCTCCTTGAATAACCCCCTCCCCCCCACGCTATTCTTCAAATTCCGATTTCAGCTTCTCTTTGTTTTTCCTTTTTTGGCACCTCGGAAAAACCTCCACGTGTTAGGTTATTCCGCCGATTCCACGGGTGGGGTGCTACCAAGACTCCTGAAAAAGAAACTGTAATGACTACAGCTAGTTCTTCTGCTTC
GTGAATGCTGGTCGCTATACTGGATCTTGCCGGTACAGGCGCTCCTTGAATAACCCCCTCCCCCCCACGCTATTCTTCAAATTCCGATTTCAGCTTCTCTTTGTTTTTCCTTTTTTGGCACCTCGGAAAAACCTCCACGTGTTAGGTTATTCCGCCGATTCCACGGGTGGGGTGCTACCAAGACTCCTGAAAAAGAAACTGTATATGACTACAGCTAGTTCTTCTGCTTC
GTGAATGCTGGTCGCTATACTGGATCTGCCGGTACAGGCGCTCCTTGAATAACCCCCTCCCCCCCACGCTATTCTTCAAATTCCGATTTCAGCTTCTCTTTGTTTTTCCTTTTTTGGCACCTCGGAAAAACCTCCACGTGTTAGGTTATTCCGCCGATTCCACGGGTGGGGTGCTACCAAGACTCCTGAAAAAGAAACTGTATGATGACTACAGCTAGTTCTTCTGCTTC
GTGAATGCTGGTCGCTATACTGGATCGCCGGTACAGGCGCTCCTTGAATAACCCCCTCCCCCCCACGCTATTCTTCAAATTCCGATTTCAGCTTCTCTTTGTTTTTCCTTTTTTGGCACCTCGGAAAAACCTCCACGTGTTAGGTTATTCCGCCGATTCCACGGGTGGGGTGCTACCAAGACTCCTGAAAAAGAAACTGTATGAATGACTACAGCTAGTTCTTCTGCTTC
GTGAATGCTGGTCGCTATACTGGATCCCGGTACAGGCGCTCCTTGAATAACCCCCTCCCCCCCACGCTATTCTTCAAATTCCGATTTCAGCTTCTCTTTGTTTTTCCTTTTTTGGCACCTCGGAAAAACCTCCACGTGTTAGGTTATTCCGCCGATTCCACGGGTGGGGTGCTACCAAGACTCCTGAAAAAGAAACTGTATGACATGACTACAGCTAGTTCTTCTGCTTC
GTGAATGCTGGTCGCTATACTGGATCCGGTACAGGCGCTCCTTGAATAACCCCCTCCCCCCCACGCTATTCTTCAAATTCCGATTTCAGCTTCTCTTTGTTTTTCCTTTTTTGGCACCTCGGAAAAACCTCCACGTGTTAGGTTATTCCGCCGATTCCACGGGTGGGGTGCTACCAAGACTCCTGAAAAAGAAACTGTATGACGATGACTACAGCTAGTTCTTCTGCTTC
GTGAATGCTGGTCGCTATACTGGATCGGTACAGGCGCTCCTTGAATAACCCCCTCCCCCCCACGCTATTCTTCAAATTCCGATTTCAGCTTCTCTTTGTTTTTCCTTTTTTGGCACCTCGGAAAAACCTCCACGTGTTAGGTTATTCCGCCGATTCCACGGGTGGGGTGCTACCAAGACTCCTGAAAAAGAAACTGTATGACGAATGACTACAGCTAGTTCTTCTGCTTC
GTGAATGCTGGTCGCTATACTGGATCGTACAGGCGCTCCTTGAATAACCCCCTCCCCCCCACGCTATTCTTCAAATTCCGATTTCAGCTTCTCTTTGTTTTTCCTTTTTTGGCACCTCGGAAAAACCTCCACGTGTTAGGTTATTCCGCCGATTCCACGGGTGGGGTGCTACCAAGACTCCTGAAAAAGAAACTGTATGACGAAATGACTACAGCTAGTTCTTCTGCTTC
GTGAATGCTGGTCGCTATACTGGATCTACAGGCGCTCCTTGAATAACCCCCTCCCCCCCACGCTATTCTTCAAATTCCGATTTCAGCTTCTCTTTGTTTTTCCTTTTTTGGCACCTCGGAAAAACCTCCACGTGTTAGGTTATTCCGCCGATTCCACGGGTGGGGTGCTACCAAGACTCCTGAAAAAGAAACTGTATGACGAAAATGACTACAGCTAGTTCTTCTGCTTC
GTGAATGCTGGTCGCTATACTGGATCACAGGCGCTCCTTGAATAACCCCCTCCCCCCCACGCTATTCTTCAAATTCCGATTTCAGCTTCTCTTTGTTTTTCCTTTTTTGGCACCTCGGAAAAACCTCCACGTGTTAGGTTATTCCGCCGATTCCACGGGTGGGGTGCTACCAAGACTCCTGAAAAAGAAACTGTATGACGAAAAATGACTACAGCTAGTTCTTCTGCTTC
GTGAATGCTGGTCGCTATACTGGATCCAGGCGCTCCTTGAATAACCCCCTCCCCCCCACGCTATTCTTCAAATTCCGATTTCAGCTTCTCTTTGTTTTTCCTTTTTTGGCACCTCGGAAAAACCTCCACGTGTTAGGTTATTCCGCCGATTCCACGGGTGGGGTGCTACCAAGACTCCTGAAAAAGAAACTGTATGACGAAAAGATGACTACAGCTAGTTCTTCTGCTTC
GTGAATGCTGGTCGCTATACTGGATCAGGCGCTCCTTGAATAACCCCCTCCCCCCCACGCTATTCTTCAAATTCCGATTTCAGCTTCTCTTTGTTTTTCCTTTTTTGGCACCTCGGAAAAACCTCCACGTGTTAGGTTATTCCGCCGATTCCACGGGTGGGGTGCTACCAAGACTCCTGAAAAAGAAACTGTATGACGAAAAGAATGACTACAGCTAGTTCTTCTGCTTC
GTGAATGCTGGTCGCTATACTGGATCGGCGCTCCTTGAATAACCCCCTCCCCCCCACGCTATTCTTCAAATTCCGATTTCAGCTTCTCTTTGTTTTTCCTTTTTTGGCACCTCGGAAAAACCTCCACGTGTTAGGTTATTCCGCCGATTCCACGGGTGGGGTGCTACCAAGACTCCTGAAAAAGAAACTGTATGACGAAAAGAAATGACTACAGCTAGTTCTTCTGCTTC
GTGAATGCTGGTCGCTATACTGGATCGCGCTCCTTGAATAACCCCCTCCCCCCCACGCTATTCTTCAAATTCCGATTTCAGCTTCTCTTTGTTTTTCCTTTTTTGGCACCTCGGAAAAACCTCCACGTGTTAGGTTATTCCGCCGATTCCACGGGTGGGGTGCTACCAAGACTCCTGAAAAAGAAACTGTATGACGAAAAGAAAATGACTACAGCTAGTTCTTCTGCTTC
GTGAATGCTGGTCGCTATACTGGATCCGCTCCTTGAATAACCCCCTCCCCCCCACGCTATTCTTCAAATTCCGATTTCAGCTTCTCTTTGTTTTTCCTTTTTTGGCACCTCGGAAAAACCTCCACGTGTTAGGTTATTCCGCCGATTCCACGGGTGGGGTGCTACCAAGACTCCTGAAAAAGAAACTGTATGACGAAAAGAAAAATGACTACAGCTAGTTCTTCTGCTTC
GTGAATGCTGGTCGCTATACTGGATCGCTCCTTGAATAACCCCCTCCCCCCCACGCTATTCTTCAAATTCCGATTTCAGCTTCTCTTTGTTTTTCCTTTTTTGGCACCTCGGAAAAACCTCCACGTGTTAGGTTATTCCGCCGATTCCACGGGTGGGGTGCTACCAAGACTCCTGAAAAAGAAACTGTATGACGAAAAGAAAAAATGACTACAGCTAGTTCTTCTGCTTC
GTGAATGCTGGTCGCTATACTGGATCCTCCTTGAATAACCCCCTCCCCCCCACGCTATTCTTCAAATTCCGATTTCAGCTTCTCTTTGTTTTTCCTTTTTTGGCACCTCGGAAAAACCTCCACGTGTTAGGTTATTCCGCCGATTCCACGGGTGGGGTGCTACCAAGACTCCTGAAAAAGAAACTGTATGACGAAAAGAAAAAAATGACTACAGCTAGTTCTTCTGCTTC
GTGAATGCTGGTCGCTATACTGGATCTCCTTGAATAACCCCCTCCCCCCCACGCTATTCTTCAAATTCCGATTTCAGCTTCTCTTTGTTTTTCCTTTTTTGGCACCTCGGAAAAACCTCCACGTGTTAGGTTATTCCGCCGATTCCACGGGTGGGGTGCTACCAAGACTCCTGAAAAAGAAACTGTATGACGAAAAGAAAAAAAATGACTACAGCTAGTTCTTCTGCTTC
GTGAATGCTGGTCGCTATACTGGATCCCTTGAATAACCCCCTCCCCCCCACGCTATTCTTCAAATTCCGATTTCAGCTTCTCTTTGTTTTTCCTTTTTTGGCACCTCGGAAAAACCTCCACGTGTTAGGTTATTCCGCCGATTCCACGGGTGGGGTGCTACCAAGACTCCTGAAAAAGAAACTGTATGACGAAAAGAAAAAAAAATGACTACAGCTAGTTCTTCTGCTTC
GTGAATGCTGGTCGCTATACTGGATCCTTGAATAACCCCCTCCCCCCCACGCTATTCTTCAAATTCCGATTTCAGCTTCTCTTTGTTTTTCCTTTTTTGGCACCTCGGAAAAACCTCCACGTGTTAGGTTATTCCGCCGATTCCACGGGTGGGGTGCTACCAAGACTCCTGAAAAAGAAACTGTATGACGAAAAGAAAAAAAAAATGACTACAGCTAGTTCTTCTGCTTC
GTGAATGCTGGTCGCTATACTGGATCTTGAATAACCCCCTCCCCCCCACGCTATTCTTCAAATTCCGATTTCAGCTTCTCTTTGTTTTTCCTTTTTTGGCACCTCGGAAAAACCTCCACGTGTTAGGTTATTCCGCCGATTCCACGGGTGGGGTGCTACCAAGACTCCTGAAAAAGAAACTGTATGACGAAAAGAAAAAAAAAAATGACTACAGCTAGTTCTTCTGCTTC
GTGAATGCTGGTCGCTATACTGGATCTGAATAACCCCCTCCCCCCCACGCTATTCTTCAAATTCCGATTTCAGCTTCTCTTTGTTTTTCCTTTTTTGGCACCTCGGAAAAACCTCCACGTGTTAGGTTATTCCGCCGATTCCACGGGTGGGGTGCTACCAAGACTCCTGAAAAAGAAACTGTATGACGAAAAGAAAAAAAAAAAATGACTACAGCTAGTTCTTCTGCTTC
GTGAATGCTGGTCGCTATACTGGATCGAATAACCCCCTCCCCCCCACGCTATTCTTCAAATTCCGATTTCAGCTTCTCTTTGTTTTTCCTTTTTTGGCACCTCGGAAAAACCTCCACGTGTTAGGTTATTCCGCCGATTCCACGGGTGGGGTGCTACCAAGACTCCTGAAAAAGAAACTGTATGACGAAAAGAAAAAAAAAAAGATGACTACAGCTAGTTCTTCTGCTTC
GTGAATGCTGGTCGCTATACTGGATCAATAACCCCCTCCCCCCCACGCTATTCTTCAAATTCCGATTTCAGCTTCTCTTTGTTTTTCCTTTTTTGGCACCTCGGAAAAACCTCCACGTGTTAGGTTATTCCGCCGATTCCACGGGTGGGGTGCTACCAAGACTCCTGAAAAAGAAACTGTATGACGAAAAGAAAAAAAAAAAGCATGACTACAGCTAGTTCTTCTGCTTC
GTGAATGCTGGTCGCTATACTGGATCATAACCCCCTCCCCCCCACGCTATTCTTCAAATTCCGATTTCAGCTTCTCTTTGTTTTTCCTTTTTTGGCACCTCGGAAAAACCTCCACGTGTTAGGTTATTCCGCCGATTCCACGGGTGGGGTGCTACCAAGACTCCTGAAAAAGAAACTGTATGACGAAAAGAAAAAAAAAAAGCTATGACTACAGCTAGTTCTTCTGCTTC
GTGAATGCTGGTCGCTATACTGGATCTAACCCCCTCCCCCCCACGCTATTCTTCAAATTCCGATTTCAGCTTCTCTTTGTTTTTCCTTTTTTGGCACCTCGGAAAAACCTCCACGTGTTAGGTTATTCCGCCGATTCCACGGGTGGGGTGCTACCAAGACTCCTGAAAAAGAAACTGTATGACGAAAAGAAAAAAAAAAAGCTGATGACTACAGCTAGTTCTTCTGCTTC
GTGAATGCTGGTCGCTATACTGGATCAACCCCCTCCCCCCCACGCTATTCTTCAAATTCCGATTTCAGCTTCTCTTTGTTTTTCCTTTTTTGGCACCTCGGAAAAACCTCCACGTGTTAGGTTATTCCGCCGATTCCACGGGTGGGGTGCTACCAAGACTCCTGAAAAAGAAACTGTATGACGAAAAGAAAAAAAAAAAGCTGCATGACTACAGCTAGTTCTTCTGCTTC
GTGAATGCTGGTCGCTATACTGGATCACCCCCTCCCCCCCACGCTATTCTTCAAATTCCGATTTCAGCTTCTCTTTGTTTTTCCTTTTTTGGCACCTCGGAAAAACCTCCACGTGTTAGGTTATTCCGCCGATTCCACGGGTGGGGTGCTACCAAGACTCCTGAAAAAGAAACTGTATGACGAAAAGAAAAAAAAAAAGCTGCTATGACTACAGCTAGTTCTTCTGCTTC
GTGAATGCTGGTCGCTATACTGGATCCCCCCTCCCCCCCACGCTATTCTTCAAATTCCGATTTCAGCTTCTCTTTGTTTTTCCTTTTTTGGCACCTCGGAAAAACCTCCACGTGTTAGGTTATTCCGCCGATTCCACGGGTGGGGTGCTACCAAGACTCCTGAAAAAGAAACTGTATGACGAAAAGAAAAAAAAAAAGCTGCTTATGACTACAGCTAGTTCTTCTGCTTC
GTGAATGCTGGTCGCTATACTGGATCCCCCTCCCCCCCACGCTATTCTTCAAATTCCGATTTCAGCTTCTCTTTGTTTTTCCTTTTTTGGCACCTCGGAAAAACCTCCACGTGTTAGGTTATTCCGCCGATTCCACGGGTGGGGTGCTACCAAGACTCCTGAAAAAGAAACTGTATGACGAAAAGAAAAAAAAAAAGCTGCTTGATGACTACAGCTAGTTCTTCTGCTTC
GTGAATGCTGGTCGCTATACTGGATCCCCTCCCCCCCACGCTATTCTTCAAATTCCGATTTCAGCTTCTCTTTGTTTTTCCTTTTTTGGCACCTCGGAAAAACCTCCACGTGTTAGGTTATTCCGCCGATTCCACGGGTGGGGTGCTACCAAGACTCCTGAAAAAGAAACTGTATGACGAAAAGAAAAAAAAAAAGCTGCTTGAATGACTACAGCTAGTTCTTCTGCTTC
GTGAATGCTGGTCGCTATACTGGATCCCTCCCCCCCACGCTATTCTTCAAATTCCGATTTCAGCTTCTCTTTGTTTTTCCTTTTTTGGCACCTCGGAAAAACCTCCACGTGTTAGGTTATTCCGCCGATTCCACGGGTGGGGTGCTACCAAGACTCCTGAAAAAGAAACTGTATGACGAAAAGAAAAAAAAAAAGCTGCTTGAAATGACTACAGCTAGTTCTTCTGCTTC
GTGAATGCTGGTCGCTATACTGGATCCTCCCCCCCACGCTATTCTTCAAATTCCGATTTCAGCTTCTCTTTGTTTTTCCTTTTTTGGCACCTCGGAAAAACCTCCACGTGTTAGGTTATTCCGCCGATTCCACGGGTGGGGTGCTACCAAGACTCCTGAAAAAGAAACTGTATGACGAAAAGAAAAAAAAAAAGCTGCTTGAATATGACTACAGCTAGTTCTTCTGCTTC
GTGAATGCTGGTCGCTATACTGGATCTCCCCCCCACGCTATTCTTCAAATTCCGATTTCAGCTTCTCTTTGTTTTTCCTTTTTTGGCACCTCGGAAAAACCTCCACGTGTTAGGTTATTCCGCCGATTCCACGGGTGGGGTGCTACCAAGACTCCTGAAAAAGAAACTGTATGACGAAAAGAAAAAAAAAAAGCTGCTTGAATTATGACTACAGCTAGTTCTTCTGCTTC
GTGAATGCTGGTCGCTATACTGGATCCCCCCCCACGCTATTCTTCAAATTCCGATTTCAGCTTCTCTTTGTTTTTCCTTTTTTGGCACCTCGGAAAAACCTCCACGTGTTAGGTTATTCCGCCGATTCCACGGGTGGGGTGCTACCAAGACTCCTGAAAAAGAAACTGTATGACGAAAAGAAAAAAAAAAAGCTGCTTGAATTCATGACTACAGCTAGTTCTTCTGCTTC
GTGAATGCTGGTCGCTATACTGGATCCCCCCCACGCTATTCTTCAAATTCCGATTTCAGCTTCTCTTTGTTTTTCCTTTTTTGGCACCTCGGAAAAACCTCCACGTGTTAGGTTATTCCGCCGATTCCACGGGTGGGGTGCTACCAAGACTCCTGAAAAAGAAACTGTATGACGAAAAGAAAAAAAAAAAGCTGCTTGAATTCCATGACTACAGCTAGTTCTTCTGCTTC
GTGAATGCTGGTCGCTATACTGGATCCCCCCACGCTATTCTTCAAATTCCGATTTCAGCTTCTCTTTGTTTTTCCTTTTTTGGCACCTCGGAAAAACCTCCACGTGTTAGGTTATTCCGCCGATTCCACGGGTGGGGTGCTACCAAGACTCCTGAAAAAGAAACTGTATGACGAAAAGAAAAAAAAAAAGCTGCTTGAATTCCAATGACTACAGCTAGTTCTTCTGCTTC
GTGAATGCTGGTCGCTATACTGGATCCCCCACGCTATTCTTCAAATTCCGATTTCAGCTTCTCTTTGTTTTTCCTTTTTTGGCACCTCGGAAAAACCTCCACGTGTTAGGTTATTCCGCCGATTCCACGGGTGGGGTGCTACCAAGACTCCTGAAAAAGAAACTGTATGACGAAAAGAAAAAAAAAAAGCTGCTTGAATTCCAAATGACTACAGCTAGTTCTTCTGCTTC
GTGAATGCTGGTCGCTATACTGGATCCCCACGCTATTCTTCAAATTCCGATTTCAGCTTCTCTTTGTTTTTCCTTTTTTGGCACCTCGGAAAAACCTCCACGTGTTAGGTTATTCCGCCGATTCCACGGGTGGGGTGCTACCAAGACTCCTGAAAAAGAAACTGTATGACGAAAAGAAAAAAAAAAAGCTGCTTGAATTCCAACATGACTACAGCTAGTTCTTCTGCTTC
GTGAATGCTGGTCGCTATACTGGATCCCACGCTATTCTTCAAATTCCGATTTCAGCTTCTCTTTGTTTTTCCTTTTTTGGCACCTCGGAAAAACCTCCACGTGTTAGGTTATTCCGCCGATTCCACGGGTGGGGTGCTACCAAGACTCCTGAAAAAGAAACTGTATGACGAAAAGAAAAAAAAAAAGCTGCTTGAATTCCAACAATGACTACAGCTAGTTCTTCTGCTTC
GTGAATGCTGGTCGCTATACTGGATCCACGCTATTCTTCAAATTCCGATTTCAGCTTCTCTTTGTTTTTCCTTTTTTGGCACCTCGGAAAAACCTCCACGTGTTAGGTTATTCCGCCGATTCCACGGGTGGGGTGCTACCAAGACTCCTGAAAAAGAAACTGTATGACGAAAAGAAAAAAAAAAAGCTGCTTGAATTCCAACACATGACTACAGCTAGTTCTTCTGCTTC
GTGAATGCTGGTCGCTATACTGGATCACGCTATTCTTCAAATTCCGATTTCAGCTTCTCTTTGTTTTTCCTTTTTTGGCACCTCGGAAAAACCTCCACGTGTTAGGTTATTCCGCCGATTCCACGGGTGGGGTGCTACCAAGACTCCTGAAAAAGAAACTGTATGACGAAAAGAAAAAAAAAAAGCTGCTTGAATTCCAACACCATGACTACAGCTAGTTCTTCTGCTTC
GTGAATGCTGGTCGCTATACTGGATCCGCTATTCTTCAAATTCCGATTTCAGCTTCTCTTTGTTTTTCCTTTTTTGGCACCTCGGAAAAACCTCCACGTGTTAGGTTATTCCGCCGATTCCACGGGTGGGGTGCTACCAAGACTCCTGAAAAAGAAACTGTATGACGAAAAGAAAAAAAAAAAGCTGCTTGAATTCCAACACCGATGACTACAGCTAGTTCTTCTGCTTC
GTGAATGCTGGTCGCTATACTGGATCGCTATTCTTCAAATTCCGATTTCAGCTTCTCTTTGTTTTTCCTTTTTTGGCACCTCGGAAAAACCTCCACGTGTTAGGTTATTCCGCCGATTCCACGGGTGGGGTGCTACCAAGACTCCTGAAAAAGAAACTGTATGACGAAAAGAAAAAAAAAAAGCTGCTTGAATTCCAACACCGCATGACTACAGCTAGTTCTTCTGCTTC
GTGAATGCTGGTCGCTATACTGGATCCTATTCTTCAAATTCCGATTTCAGCTTCTCTTTGTTTTTCCTTTTTTGGCACCTCGGAAAAACCTCCACGTGTTAGGTTATTCCGCCGATTCCACGGGTGGGGTGCTACCAAGACTCCTGAAAAAGAAACTGTATGACGAAAAGAAAAAAAAAAAGCTGCTTGAATTCCAACACCGCTATGACTACAGCTAGTTCTTCTGCTTC
GTGAATGCTGGTCGCTATACTGGATCTATTCTTCAAATTCCGATTTCAGCTTCTCTTTGTTTTTCCTTTTTTGGCACCTCGGAAAAACCTCCACGTGTTAGGTTATTCCGCCGATTCCACGGGTGGGGTGCTACCAAGACTCCTGAAAAAGAAACTGTATGACGAAAAGAAAAAAAAAAAGCTGCTTGAATTCCAACACCGCTTATGACTACAGCTAGTTCTTCTGCTTC
GTGAATGCTGGTCGCTATACTGGATCATTCTTCAAATTCCGATTTCAGCTTCTCTTTGTTTTTCCTTTTTTGGCACCTCGGAAAAACCTCCACGTGTTAGGTTATTCCGCCGATTCCACGGGTGGGGTGCTACCAAGACTCCTGAAAAAGAAACTGTATGACGAAAAGAAAAAAAAAAAGCTGCTTGAATTCCAACACCGCTTTATGACTACAGCTAGTTCTTCTGCTTC
GTGAATGCTGGTCGCTATACTGGATCTTCTTCAAATTCCGATTTCAGCTTCTCTTTGTTTTTCCTTTTTTGGCACCTCGGAAAAACCTCCACGTGTTAGGTTATTCCGCCGATTCCACGGGTGGGGTGCTACCAAGACTCCTGAAAAAGAAACTGTATGACGAAAAGAAAAAAAAAAAGCTGCTTGAATTCCAACACCGCTTTCATGACTACAGCTAGTTCTTCTGCTTC
GTGAATGCTGGTCGCTATACTGGATCTCTTCAAATTCCGATTTCAGCTTCTCTTTGTTTTTCCTTTTTTGGCACCTCGGAAAAACCTCCACGTGTTAGGTTATTCCGCCGATTCCACGGGTGGGGTGCTACCAAGACTCCTGAAAAAGAAACTGTATGACGAAAAGAAAAAAAAAAAGCTGCTTGAATTCCAACACCGCTTTCTATGACTACAGCTAGTTCTTCTGCTTC
GTGAATGCTGGTCGCTATACTGGATCCTTCAAATTCCGATTTCAGCTTCTCTTTGTTTTTCCTTTTTTGGCACCTCGGAAAAACCTCCACGTGTTAGGTTATTCCGCCGATTCCACGGGTGGGGTGCTACCAAGACTCCTGAAAAAGAAACTGTATGACGAAAAGAAAAAAAAAAAGCTGCTTGAATTCCAACACCGCTTTCTTATGACTACAGCTAGTTCTTCTGCTTC
GTGAATGCTGGTCGCTATACTGGATCTTCAAATTCCGATTTCAGCTTCTCTTTGTTTTTCCTTTTTTGGCACCTCGGAAAAACCTCCACGTGTTAGGTTATTCCGCCGATTCCACGGGTGGGGTGCTACCAAGACTCCTGAAAAAGAAACTGTATGACGAAAAGAAAAAAAAAAAGCTGCTTGAATTCCAACACCGCTTTCTTGATGACTACAGCTAGTTCTTCTGCTTC
GTGAATGCTGGTCGCTATACTGGATCTCAAATTCCGATTTCAGCTTCTCTTTGTTTTTCCTTTTTTGGCACCTCGGAAAAACCTCCACGTGTTAGGTTATTCCGCCGATTCCACGGGTGGGGTGCTACCAAGACTCCTGAAAAAGAAACTGTATGACGAAAAGAAAAAAAAAAAGCTGCTTGAATTCCAACACCGCTTTCTTGTATGACTACAGCTAGTTCTTCTGCTTC
GTGAATGCTGGTCGCTATACTGGATCCAAATTCCGATTTCAGCTTCTCTTTGTTTTTCCTTTTTTGGCACCTCGGAAAAACCTCCACGTGTTAGGTTATTCCGCCGATTCCACGGGTGGGGTGCTACCAAGACTCCTGAAAAAGAAACTGTATGACGAAAAGAAAAAAAAAAAGCTGCTTGAATTCCAACACCGCTTTCTTGTTATGACTACAGCTAGTTCTTCTGCTTC
GTGAATGCTGGTCGCTATACTGGATCAAATTCCGATTTCAGCTTCTCTTTGTTTTTCCTTTTTTGGCACCTCGGAAAAACCTCCACGTGTTAGGTTATTCCGCCGATTCCACGGGTGGGGTGCTACCAAGACTCCTGAAAAAGAAACTGTATGACGAAAAGAAAAAAAAAAAGCTGCTTGAATTCCAACACCGCTTTCTTGTTCATGACTACAGCTAGTTCTTCTGCTTC
GTGAATGCTGGTCGCTATACTGGATCAATTCCGATTTCAGCTTCTCTTTGTTTTTCCTTTTTTGGCACCTCGGAAAAACCTCCACGTGTTAGGTTATTCCGCCGATTCCACGGGTGGGGTGCTACCAAGACTCCTGAAAAAGAAACTGTATGACGAAAAGAAAAAAAAAAAGCTGCTTGAATTCCAACACCGCTTTCTTGTTCTATGACTACAGCTAGTTCTTCTGCTTC
GTGAATGCTGGTCGCTATACTGGATCATTCCGATTTCAGCTTCTCTTTGTTTTTCCTTTTTTGGCACCTCGGAAAAACCTCCACGTGTTAGGTTATTCCGCCGATTCCACGGGTGGGGTGCTACCAAGACTCCTGAAAAAGAAACTGTATGACGAAAAGAAAAAAAAAAAGCTGCTTGAATTCCAACACCGCTTTCTTGTTCTGATGACTACAGCTAGTTCTTCTGCTTC
GTGAATGCTGGTCGCTATACTGGATCTTCCGATTTCAGCTTCTCTTTGTTTTTCCTTTTTTGGCACCTCGGAAAAACCTCCACGTGTTAGGTTATTCCGCCGATTCCACGGGTGGGGTGCTACCAAGACTCCTGAAAAAGAAACTGTATGACGAAAAGAAAAAAAAAAAGCTGCTTGAATTCCAACACCGCTTTCTTGTTCTGAATGACTACAGCTAGTTCTTCTGCTTC
GTGAATGCTGGTCGCTATACTGGATCTCCGATTTCAGCTTCTCTTTGTTTTTCCTTTTTTGGCACCTCGGAAAAACCTCCACGTGTTAGGTTATTCCGCCGATTCCACGGGTGGGGTGCTACCAAGACTCCTGAAAAAGAAACTGTATGACGAAAAGAAAAAAAAAAAGCTGCTTGAATTCCAACACCGCTTTCTTGTTCTGACATGACTACAGCTAGTTCTTCTGCTTC
GTGAATGCTGGTCGCTATACTGGATCCCGATTTCAGCTTCTCTTTGTTTTTCCTTTTTTGGCACCTCGGAAAAACCTCCACGTGTTAGGTTATTCCGCCGATTCCACGGGTGGGGTGCTACCAAGACTCCTGAAAAAGAAACTGTATGACGAAAAGAAAAAAAAAAAGCTGCTTGAATTCCAACACCGCTTTCTTGTTCTGACAATGACTACAGCTAGTTCTTCTGCTTC
GTGAATGCTGGTCGCTATACTGGATCCGATTTCAGCTTCTCTTTGTTTTTCCTTTTTTGGCACCTCGGAAAAACCTCCACGTGTTAGGTTATTCCGCCGATTCCACGGGTGGGGTGCTACCAAGACTCCTGAAAAAGAAACTGTATGACGAAAAGAAAAAAAAAAAGCTGCTTGAATTCCAACACCGCTTTCTTGTTCTGACAAATGACTACAGCTAGTTCTTCTGCTTC
GTGAATGCTGGTCGCTATACTGGATCGATTTCAGCTTCTCTTTGTTTTTCCTTTTTTGGCACCTCGGAAAAACCTCCACGTGTTAGGTTATTCCGCCGATTCCACGGGTGGGGTGCTACCAAGACTCCTGAAAAAGAAACTGTATGACGAAAAGAAAAAAAAAAAGCTGCTTGAATTCCAACACCGCTTTCTTGTTCTGACAATATGACTACAGCTAGTTCTTCTGCTTC
GTGAATGCTGGTCGCTATACTGGATCATTTCAGCTTCTCTTTGTTTTTCCTTTTTTGGCACCTCGGAAAAACCTCCACGTGTTAGGTTATTCCGCCGATTCCACGGGTGGGGTGCTACCAAGACTCCTGAAAAAGAAACTGTATGACGAAAAGAAAAAAAAAAAGCTGCTTGAATTCCAACACCGCTTTCTTGTTCTGACAATAATGACTACAGCTAGTTCTTCTGCTTC
GTGAATGCTGGTCGCTATACTGGATCTTTCAGCTTCTCTTTGTTTTTCCTTTTTTGGCACCTCGGAAAAACCTCCACGTGTTAGGTTATTCCGCCGATTCCACGGGTGGGGTGCTACCAAGACTCCTGAAAAAGAAACTGTATGACGAAAAGAAAAAAAAAAAGCTGCTTGAATTCCAACACCGCTTTCTTGTTCTGACAATAGATGACTACAGCTAGTTCTTCTGCTTC
GTGAATGCTGGTCGCTATACTGGATCTTCAGCTTCTCTTTGTTTTTCCTTTTTTGGCACCTCGGAAAAACCTCCACGTGTTAGGTTATTCCGCCGATTCCACGGGTGGGGTGCTACCAAGACTCCTGAAAAAGAAACTGTATGACGAAAAGAAAAAAAAAAAGCTGCTTGAATTCCAACACCGCTTTCTTGTTCTGACAATAGAATGACTACAGCTAGTTCTTCTGCTTC
GTGAATGCTGGTCGCTATACTGGATCTCAGCTTCTCTTTGTTTTTCCTTTTTTGGCACCTCGGAAAAACCTCCACGTGTTAGGTTATTCCGCCGATTCCACGGGTGGGGTGCTACCAAGACTCCTGAAAAAGAAACTGTATGACGAAAAGAAAAAAAAAAAGCTGCTTGAATTCCAACACCGCTTTCTTGTTCTGACAATAGAAATGACTACAGCTAGTTCTTCTGCTTC
GTGAATGCTGGTCGCTATACTGGATCCAGCTTCTCTTTGTTTTTCCTTTTTTGGCACCTCGGAAAAACCTCCACGTGTTAGGTTATTCCGCCGATTCCACGGGTGGGGTGCTACCAAGACTCCTGAAAAAGAAACTGTATGACGAAAAGAAAAAAAAAAAGCTGCTTGAATTCCAACACCGCTTTCTTGTTCTGACAATAGAAAATGACTACAGCTAGTTCTTCTGCTTC
GTGAATGCTGGTCGCTATACTGGATCAGCTTCTCTTTGTTTTTCCTTTTTTGGCACCTCGGAAAAACCTCCACGTGTTAGGTTATTCCGCCGATTCCACGGGTGGGGTGCTACCAAGACTCCTGAAAAAGAAACTGTATGACGAAAAGAAAAAAAAAAAGCTGCTTGAATTCCAACACCGCTTTCTTGTTCTGACAATAGAAAGATGACTACAGCTAGTTCTTCTGCTTC
GTGAATGCTGGTCGCTATACTGGATCGCTTCTCTTTGTTTTTCCTTTTTTGGCACCTCGGAAAAACCTCCACGTGTTAGGTTATTCCGCCGATTCCACGGGTGGGGTGCTACCAAGACTCCTGAAAAAGAAACTGTATGACGAAAAGAAAAAAAAAAAGCTGCTTGAATTCCAACACCGCTTTCTTGTTCTGACAATAGAAAGGATGACTACAGCTAGTTCTTCTGCTTC
GTGAATGCTGGTCGCTATACTGGATCCTTCTCTTTGTTTTTCCTTTTTTGGCACCTCGGAAAAACCTCCACGTGTTAGGTTATTCCGCCGATTCCACGGGTGGGGTGCTACCAAGACTCCTGAAAAAGAAACTGTATGACGAAAAGAAAAAAAAAAAGCTGCTTGAATTCCAACACCGCTTTCTTGTTCTGACAATAGAAAGGGATGACTACAGCTAGTTCTTCTGCTTC
GTGAATGCTGGTCGCTATACTGGATCTTCTCTTTGTTTTTCCTTTTTTGGCACCTCGGAAAAACCTCCACGTGTTAGGTTATTCCGCCGATTCCACGGGTGGGGTGCTACCAAGACTCCTGAAAAAGAAACTGTATGACGAAAAGAAAAAAAAAAAGCTGCTTGAATTCCAACACCGCTTTCTTGTTCTGACAATAGAAAGGGGATGACTACAGCTAGTTCTTCTGCTTC
GTGAATGCTGGTCGCTATACTGGATCTCTCTTTGTTTTTCCTTTTTTGGCACCTCGGAAAAACCTCCACGTGTTAGGTTATTCCGCCGATTCCACGGGTGGGGTGCTACCAAGACTCCTGAAAAAGAAACTGTATGACGAAAAGAAAAAAAAAAAGCTGCTTGAATTCCAACACCGCTTTCTTGTTCTGACAATAGAAAGGGGGATGACTACAGCTAGTTCTTCTGCTTC
GTGAATGCTGGTCGCTATACTGGATCCTCTTTGTTTTTCCTTTTTTGGCACCTCGGAAAAACCTCCACGTGTTAGGTTATTCCGCCGATTCCACGGGTGGGGTGCTACCAAGACTCCTGAAAAAGAAACTGTATGACGAAAAGAAAAAAAAAAAGCTGCTTGAATTCCAACACCGCTTTCTTGTTCTGACAATAGAAAGGGGGAATGACTACAGCTAGTTCTTCTGCTTC
GTGAATGCTGGTCGCTATACTGGATCTCTTTGTTTTTCCTTTTTTGGCACCTCGGAAAAACCTCCACGTGTTAGGTTATTCCGCCGATTCCACGGGTGGGGTGCTACCAAGACTCCTGAAAAAGAAACTGTATGACGAAAAGAAAAAAAAAAAGCTGCTTGAATTCCAACACCGCTTTCTTGTTCTGACAATAGAAAGGGGGATATGACTACAGCTAGTTCTTCTGCTTC
GTGAATGCTGGTCGCTATACTGGATCCTTTGTTTTTCCTTTTTTGGCACCTCGGAAAAACCTCCACGTGTTAGGTTATTCCGCCGATTCCACGGGTGGGGTGCTACCAAGACTCCTGAAAAAGAAACTGTATGACGAAAAGAAAAAAAAAAAGCTGCTTGAATTCCAACACCGCTTTCTTGTTCTGACAATAGAAAGGGGGATTATGACTACAGCTAGTTCTTCTGCTTC
GTGAATGCTGGTCGCTATACTGGATCTTTGTTTTTCCTTTTTTGGCACCTCGGAAAAACCTCCACGTGTTAGGTTATTCCGCCGATTCCACGGGTGGGGTGCTACCAAGACTCCTGAAAAAGAAACTGTATGACGAAAAGAAAAAAAAAAAGCTGCTTGAATTCCAACACCGCTTTCTTGTTCTGACAATAGAAAGGGGGATTCATGACTACAGCTAGTTCTTCTGCTTC
GTGAATGCTGGTCGCTATACTGGATCTTGTTTTTCCTTTTTTGGCACCTCGGAAAAACCTCCACGTGTTAGGTTATTCCGCCGATTCCACGGGTGGGGTGCTACCAAGACTCCTGAAAAAGAAACTGTATGACGAAAAGAAAAAAAAAAAGCTGCTTGAATTCCAACACCGCTTTCTTGTTCTGACAATAGAAAGGGGGATTCCATGACTACAGCTAGTTCTTCTGCTTC
GTGAATGCTGGTCGCTATACTGGATCTGTTTTTCCTTTTTTGGCACCTCGGAAAAACCTCCACGTGTTAGGTTATTCCGCCGATTCCACGGGTGGGGTGCTACCAAGACTCCTGAAAAAGAAACTGTATGACGAAAAGAAAAAAAAAAAGCTGCTTGAATTCCAACACCGCTTTCTTGTTCTGACAATAGAAAGGGGGATTCCTATGACTACAGCTAGTTCTTCTGCTTC
GTGAATGCTGGTCGCTATACTGGATCGTTTTTCCTTTTTTGGCACCTCGGAAAAACCTCCACGTGTTAGGTTATTCCGCCGATTCCACGGGTGGGGTGCTACCAAGACTCCTGAAAAAGAAACTGTATGACGAAAAGAAAAAAAAAAAGCTGCTTGAATTCCAACACCGCTTTCTTGTTCTGACAATAGAAAGGGGGATTCCTAATGACTACAGCTAGTTCTTCTGCTTC
GTGAATGCTGGTCGCTATACTGGATCTTTTTCCTTTTTTGGCACCTCGGAAAAACCTCCACGTGTTAGGTTATTCCGCCGATTCCACGGGTGGGGTGCTACCAAGACTCCTGAAAAAGAAACTGTATGACGAAAAGAAAAAAAAAAAGCTGCTTGAATTCCAACACCGCTTTCTTGTTCTGACAATAGAAAGGGGGATTCCTAAATGACTACAGCTAGTTCTTCTGCTTC
GTGAATGCTGGTCGCTATACTGGATCTTTTCCTTTTTTGGCACCTCGGAAAAACCTCCACGTGTTAGGTTATTCCGCCGATTCCACGGGTGGGGTGCTACCAAGACTCCTGAAAAAGAAACTGTATGACGAAAAGAAAAAAAAAAAGCTGCTTGAATTCCAACACCGCTTTCTTGTTCTGACAATAGAAAGGGGGATTCCTAAAATGACTACAGCTAGTTCTTCTGCTTC
GTGAATGCTGGTCGCTATACTGGATCTTTCCTTTTTTGGCACCTCGGAAAAACCTCCACGTGTTAGGTTATTCCGCCGATTCCACGGGTGGGGTGCTACCAAGACTCCTGAAAAAGAAACTGTATGACGAAAAGAAAAAAAAAAAGCTGCTTGAATTCCAACACCGCTTTCTTGTTCTGACAATAGAAAGGGGGATTCCTAAAAATGACTACAGCTAGTTCTTCTGCTTC
GTGAATGCTGGTCGCTATACTGGATCTTCCTTTTTTGGCACCTCGGAAAAACCTCCACGTGTTAGGTTATTCCGCCGATTCCACGGGTGGGGTGCTACCAAGACTCCTGAAAAAGAAACTGTATGACGAAAAGAAAAAAAAAAAGCTGCTTGAATTCCAACACCGCTTTCTTGTTCTGACAATAGAAAGGGGGATTCCTAAAAAATGACTACAGCTAGTTCTTCTGCTTC
GTGAATGCTGGTCGCTATACTGGATCTCCTTTTTTGGCACCTCGGAAAAACCTCCACGTGTTAGGTTATTCCGCCGATTCCACGGGTGGGGTGCTACCAAGACTCCTGAAAAAGAAACTGTATGACGAAAAGAAAAAAAAAAAGCTGCTTGAATTCCAACACCGCTTTCTTGTTCTGACAATAGAAAGGGGGATTCCTAAAAAAATGACTACAGCTAGTTCTTCTGCTTC
GTGAATGCTGGTCGCTATACTGGATCCCTTTTTTGGCACCTCGGAAAAACCTCCACGTGTTAGGTTATTCCGCCGATTCCACGGGTGGGGTGCTACCAAGACTCCTGAAAAAGAAACTGTATGACGAAAAGAAAAAAAAAAAGCTGCTTGAATTCCAACACCGCTTTCTTGTTCTGACAATAGAAAGGGGGATTCCTAAAAAAAATGACTACAGCTAGTTCTTCTGCTTC
GTGAATGCTGGTCGCTATACTGGATCCTTTTTTGGCACCTCGGAAAAACCTCCACGTGTTAGGTTATTCCGCCGATTCCACGGGTGGGGTGCTACCAAGACTCCTGAAAAAGAAACTGTATGACGAAAAGAAAAAAAAAAAGCTGCTTGAATTCCAACACCGCTTTCTTGTTCTGACAATAGAAAGGGGGATTCCTAAAAAAAGATGACTACAGCTAGTTCTTCTGCTTC
GTGAATGCTGGTCGCTATACTGGATCTTTTTTGGCACCTCGGAAAAACCTCCACGTGTTAGGTTATTCCGCCGATTCCACGGGTGGGGTGCTACCAAGACTCCTGAAAAAGAAACTGTATGACGAAAAGAAAAAAAAAAAGCTGCTTGAATTCCAACACCGCTTTCTTGTTCTGACAATAGAAAGGGGGATTCCTAAAAAAAGAATGACTACAGCTAGTTCTTCTGCTTC
GTGAATGCTGGTCGCTATACTGGATCTTTTTGGCACCTCGGAAAAACCTCCACGTGTTAGGTTATTCCGCCGATTCCACGGGTGGGGTGCTACCAAGACTCCTGAAAAAGAAACTGTATGACGAAAAGAAAAAAAAAAAGCTGCTTGAATTCCAACACCGCTTTCTTGTTCTGACAATAGAAAGGGGGATTCCTAAAAAAAGAAATGACTACAGCTAGTTCTTCTGCTTC
GTGAATGCTGGTCGCTATACTGGATCTTTTGGCACCTCGGAAAAACCTCCACGTGTTAGGTTATTCCGCCGATTCCACGGGTGGGGTGCTACCAAGACTCCTGAAAAAGAAACTGTATGACGAAAAGAAAAAAAAAAAGCTGCTTGAATTCCAACACCGCTTTCTTGTTCTGACAATAGAAAGGGGGATTCCTAAAAAAAGAAAATGACTACAGCTAGTTCTTCTGCTTC
GTGAATGCTGGTCGCTATACTGGATCTTTGGCACCTCGGAAAAACCTCCACGTGTTAGGTTATTCCGCCGATTCCACGGGTGGGGTGCTACCAAGACTCCTGAAAAAGAAACTGTATGACGAAAAGAAAAAAAAAAAGCTGCTTGAATTCCAACACCGCTTTCTTGTTCTGACAATAGAAAGGGGGATTCCTAAAAAAAGAAAAATGACTACAGCTAGTTCTTCTGCTTC
GTGAATGCTGGTCGCTATACTGGATCTTGGCACCTCGGAAAAACCTCCACGTGTTAGGTTATTCCGCCGATTCCACGGGTGGGGTGCTACCAAGACTCCTGAAAAAGAAACTGTATGACGAAAAGAAAAAAAAAAAGCTGCTTGAATTCCAACACCGCTTTCTTGTTCTGACAATAGAAAGGGGGATTCCTAAAAAAAGAAAAAATGACTACAGCTAGTTCTTCTGCTTC
GTGAATGCTGGTCGCTATACTGGATCTGGCACCTCGGAAAAACCTCCACGTGTTAGGTTATTCCGCCGATTCCACGGGTGGGGTGCTACCAAGACTCCTGAAAAAGAAACTGTATGACGAAAAGAAAAAAAAAAAGCTGCTTGAATTCCAACACCGCTTTCTTGTTCTGACAATAGAAAGGGGGATTCCTAAAAAAAGAAAAAGATGACTACAGCTAGTTCTTCTGCTTC
GTGAATGCTGGTCGCTATACTGGATCGGCACCTCGGAAAAACCTCCACGTGTTAGGTTATTCCGCCGATTCCACGGGTGGGGTGCTACCAAGACTCCTGAAAAAGAAACTGTATGACGAAAAGAAAAAAAAAAAGCTGCTTGAATTCCAACACCGCTTTCTTGTTCTGACAATAGAAAGGGGGATTCCTAAAAAAAGAAAAAGAATGACTACAGCTAGTTCTTCTGCTTC
GTGAATGCTGGTCGCTATACTGGATCGCACCTCGGAAAAACCTCCACGTGTTAGGTTATTCCGCCGATTCCACGGGTGGGGTGCTACCAAGACTCCTGAAAAAGAAACTGTATGACGAAAAGAAAAAAAAAAAGCTGCTTGAATTCCAACACCGCTTTCTTGTTCTGACAATAGAAAGGGGGATTCCTAAAAAAAGAAAAAGAGATGACTACAGCTAGTTCTTCTGCTTC
GTGAATGCTGGTCGCTATACTGGATCCACCTCGGAAAAACCTCCACGTGTTAGGTTATTCCGCCGATTCCACGGGTGGGGTGCTACCAAGACTCCTGAAAAAGAAACTGTATGACGAAAAGAAAAAAAAAAAGCTGCTTGAATTCCAACACCGCTTTCTTGTTCTGACAATAGAAAGGGGGATTCCTAAAAAAAGAAAAAGAGGATGACTACAGCTAGTTCTTCTGCTTC
GTGAATGCTGGTCGCTATACTGGATCACCTCGGAAAAACCTCCACGTGTTAGGTTATTCCGCCGATTCCACGGGTGGGGTGCTACCAAGACTCCTGAAAAAGAAACTGTATGACGAAAAGAAAAAAAAAAAGCTGCTTGAATTCCAACACCGCTTTCTTGTTCTGACAATAGAAAGGGGGATTCCTAAAAAAAGAAAAAGAGGGATGACTACAGCTAGTTCTTCTGCTTC
GTGAATGCTGGTCGCTATACTGGATCCCTCGGAAAAACCTCCACGTGTTAGGTTATTCCGCCGATTCCACGGGTGGGGTGCTACCAAGACTCCTGAAAAAGAAACTGTATGACGAAAAGAAAAAAAAAAAGCTGCTTGAATTCCAACACCGCTTTCTTGTTCTGACAATAGAAAGGGGGATTCCTAAAAAAAGAAAAAGAGGGCATGACTACAGCTAGTTCTTCTGCTTC
GTGAATGCTGGTCGCTATACTGGATCCTCGGAAAAACCTCCACGTGTTAGGTTATTCCGCCGATTCCACGGGTGGGGTGCTACCAAGACTCCTGAAAAAGAAACTGTATGACGAAAAGAAAAAAAAAAAGCTGCTTGAATTCCAACACCGCTTTCTTGTTCTGACAATAGAAAGGGGGATTCCTAAAAAAAGAAAAAGAGGGCGATGACTACAGCTAGTTCTTCTGCTTC
GTGAATGCTGGTCGCTATACTGGATCTCGGAAAAACCTCCACGTGTTAGGTTATTCCGCCGATTCCACGGGTGGGGTGCTACCAAGACTCCTGAAAAAGAAACTGTATGACGAAAAGAAAAAAAAAAAGCTGCTTGAATTCCAACACCGCTTTCTTGTTCTGACAATAGAAAGGGGGATTCCTAAAAAAAGAAAAAGAGGGCGGATGACTACAGCTAGTTCTTCTGCTTC
GTGAATGCTGGTCGCTATACTGGATCCGGAAAAACCTCCACGTGTTAGGTTATTCCGCCGATTCCACGGGTGGGGTGCTACCAAGACTCCTGAAAAAGAAACTGTATGACGAAAAGAAAAAAAAAAAGCTGCTTGAATTCCAACACCGCTTTCTTGTTCTGACAATAGAAAGGGGGATTCCTAAAAAAAGAAAAAGAGGGCGGGATGACTACAGCTAGTTCTTCTGCTTC
GTGAATGCTGGTCGCTATACTGGATCGGAAAAACCTCCACGTGTTAGGTTATTCCGCCGATTCCACGGGTGGGGTGCTACCAAGACTCCTGAAAAAGAAACTGTATGACGAAAAGAAAAAAAAAAAGCTGCTTGAATTCCAACACCGCTTTCTTGTTCTGACAATAGAAAGGGGGATTCCTAAAAAAAGAAAAAGAGGGCGGGGATGACTACAGCTAGTTCTTCTGCTTC
GTGAATGCTGGTCGCTATACTGGATCGAAAAACCTCCACGTGTTAGGTTATTCCGCCGATTCCACGGGTGGGGTGCTACCAAGACTCCTGAAAAAGAAACTGTATGACGAAAAGAAAAAAAAAAAGCTGCTTGAATTCCAACACCGCTTTCTTGTTCTGACAATAGAAAGGGGGATTCCTAAAAAAAGAAAAAGAGGGCGGGGTATGACTACAGCTAGTTCTTCTGCTTC
GTGAATGCTGGTCGCTATACTGGATCAAAAACCTCCACGTGTTAGGTTATTCCGCCGATTCCACGGGTGGGGTGCTACCAAGACTCCTGAAAAAGAAACTGTATGACGAAAAGAAAAAAAAAAAGCTGCTTGAATTCCAACACCGCTTTCTTGTTCTGACAATAGAAAGGGGGATTCCTAAAAAAAGAAAAAGAGGGCGGGGTTATGACTACAGCTAGTTCTTCTGCTTC
GTGAATGCTGGTCGCTATACTGGATCAAAACCTCCACGTGTTAGGTTATTCCGCCGATTCCACGGGTGGGGTGCTACCAAGACTCCTGAAAAAGAAACTGTATGACGAAAAGAAAAAAAAAAAGCTGCTTGAATTCCAACACCGCTTTCTTGTTCTGACAATAGAAAGGGGGATTCCTAAAAAAAGAAAAAGAGGGCGGGGTTTATGACTACAGCTAGTTCTTCTGCTTC
GTGAATGCTGGTCGCTATACTGGATCAAACCTCCACGTGTTAGGTTATTCCGCCGATTCCACGGGTGGGGTGCTACCAAGACTCCTGAAAAAGAAACTGTATGACGAAAAGAAAAAAAAAAAGCTGCTTGAATTCCAACACCGCTTTCTTGTTCTGACAATAGAAAGGGGGATTCCTAAAAAAAGAAAAAGAGGGCGGGGTTTAATGACTACAGCTAGTTCTTCTGCTTC
GTGAATGCTGGTCGCTATACTGGATCAACCTCCACGTGTTAGGTTATTCCGCCGATTCCACGGGTGGGGTGCTACCAAGACTCCTGAAAAAGAAACTGTATGACGAAAAGAAAAAAAAAAAGCTGCTTGAATTCCAACACCGCTTTCTTGTTCTGACAATAGAAAGGGGGATTCCTAAAAAAAGAAAAAGAGGGCGGGGTTTATATGACTACAGCTAGTTCTTCTGCTTC
GTGAATGCTGGTCGCTATACTGGATCACCTCCACGTGTTAGGTTATTCCGCCGATTCCACGGGTGGGGTGCTACCAAGACTCCTGAAAAAGAAACTGTATGACGAAAAGAAAAAAAAAAAGCTGCTTGAATTCCAACACCGCTTTCTTGTTCTGACAATAGAAAGGGGGATTCCTAAAAAAAGAAAAAGAGGGCGGGGTTTATCATGACTACAGCTAGTTCTTCTGCTTC
GTGAATGCTGGTCGCTATACTGGATCCCTCCACGTGTTAGGTTATTCCGCCGATTCCACGGGTGGGGTGCTACCAAGACTCCTGAAAAAGAAACTGTATGACGAAAAGAAAAAAAAAAAGCTGCTTGAATTCCAACACCGCTTTCTTGTTCTGACAATAGAAAGGGGGATTCCTAAAAAAAGAAAAAGAGGGCGGGGTTTATCAATGACTACAGCTAGTTCTTCTGCTTC
GTGAATGCTGGTCGCTATACTGGATCCTCCACGTGTTAGGTTATTCCGCCGATTCCACGGGTGGGGTGCTACCAAGACTCCTGAAAAAGAAACTGTATGACGAAAAGAAAAAAAAAAAGCTGCTTGAATTCCAACACCGCTTTCTTGTTCTGACAATAGAAAGGGGGATTCCTAAAAAAAGAAAAAGAGGGCGGGGTTTATCATATGACTACAGCTAGTTCTTCTGCTTC
GTGAATGCTGGTCGCTATACTGGATCTCCACGTGTTAGGTTATTCCGCCGATTCCACGGGTGGGGTGCTACCAAGACTCCTGAAAAAGAAACTGTATGACGAAAAGAAAAAAAAAAAGCTGCTTGAATTCCAACACCGCTTTCTTGTTCTGACAATAGAAAGGGGGATTCCTAAAAAAAGAAAAAGAGGGCGGGGTTTATCATGATGACTACAGCTAGTTCTTCTGCTTC
GTGAATGCTGGTCGCTATACTGGATCCCACGTGTTAGGTTATTCCGCCGATTCCACGGGTGGGGTGCTACCAAGACTCCTGAAAAAGAAACTGTATGACGAAAAGAAAAAAAAAAAGCTGCTTGAATTCCAACACCGCTTTCTTGTTCTGACAATAGAAAGGGGGATTCCTAAAAAAAGAAAAAGAGGGCGGGGTTTATCATGTATGACTACAGCTAGTTCTTCTGCTTC
GTGAATGCTGGTCGCTATACTGGATCCACGTGTTAGGTTATTCCGCCGATTCCACGGGTGGGGTGCTACCAAGACTCCTGAAAAAGAAACTGTATGACGAAAAGAAAAAAAAAAAGCTGCTTGAATTCCAACACCGCTTTCTTGTTCTGACAATAGAAAGGGGGATTCCTAAAAAAAGAAAAAGAGGGCGGGGTTTATCATGTAATGACTACAGCTAGTTCTTCTGCTTC
GTGAATGCTGGTCGCTATACTGGATCACGTGTTAGGTTATTCCGCCGATTCCACGGGTGGGGTGCTACCAAGACTCCTGAAAAAGAAACTGTATGACGAAAAGAAAAAAAAAAAGCTGCTTGAATTCCAACACCGCTTTCTTGTTCTGACAATAGAAAGGGGGATTCCTAAAAAAAGAAAAAGAGGGCGGGGTTTATCATGTACATGACTACAGCTAGTTCTTCTGCTTC
GTGAATGCTGGTCGCTATACTGGATCCGTGTTAGGTTATTCCGCCGATTCCACGGGTGGGGTGCTACCAAGACTCCTGAAAAAGAAACTGTATGACGAAAAGAAAAAAAAAAAGCTGCTTGAATTCCAACACCGCTTTCTTGTTCTGACAATAGAAAGGGGGATTCCTAAAAAAAGAAAAAGAGGGCGGGGTTTATCATGTACTATGACTACAGCTAGTTCTTCTGCTTC
GTGAATGCTGGTCGCTATACTGGATCGTGTTAGGTTATTCCGCCGATTCCACGGGTGGGGTGCTACCAAGACTCCTGAAAAAGAAACTGTATGACGAAAAGAAAAAAAAAAAGCTGCTTGAATTCCAACACCGCTTTCTTGTTCTGACAATAGAAAGGGGGATTCCTAAAAAAAGAAAAAGAGGGCGGGGTTTATCATGTACTCATGACTACAGCTAGTTCTTCTGCTTC
GTGAATGCTGGTCGCTATACTGGATCTGTTAGGTTATTCCGCCGATTCCACGGGTGGGGTGCTACCAAGACTCCTGAAAAAGAAACTGTATGACGAAAAGAAAAAAAAAAAGCTGCTTGAATTCCAACACCGCTTTCTTGTTCTGACAATAGAAAGGGGGATTCCTAAAAAAAGAAAAAGAGGGCGGGGTTTATCATGTACTCAATGACTACAGCTAGTTCTTCTGCTTC
GTGAATGCTGGTCGCTATACTGGATCGTTAGGTTATTCCGCCGATTCCACGGGTGGGGTGCTACCAAGACTCCTGAAAAAGAAACTGTATGACGAAAAGAAAAAAAAAAAGCTGCTTGAATTCCAACACCGCTTTCTTGTTCTGACAATAGAAAGGGGGATTCCTAAAAAAAGAAAAAGAGGGCGGGGTTTATCATGTACTCAGATGACTACAGCTAGTTCTTCTGCTTC
GTGAATGCTGGTCGCTATACTGGATCTTAGGTTATTCCGCCGATTCCACGGGTGGGGTGCTACCAAGACTCCTGAAAAAGAAACTGTATGACGAAAAGAAAAAAAAAAAGCTGCTTGAATTCCAACACCGCTTTCTTGTTCTGACAATAGAAAGGGGGATTCCTAAAAAAAGAAAAAGAGGGCGGGGTTTATCATGTACTCAGAATGACTACAGCTAGTTCTTCTGCTTC
GTGAATGCTGGTCGCTATACTGGATCTAGGTTATTCCGCCGATTCCACGGGTGGGGTGCTACCAAGACTCCTGAAAAAGAAACTGTATGACGAAAAGAAAAAAAAAAAGCTGCTTGAATTCCAACACCGCTTTCTTGTTCTGACAATAGAAAGGGGGATTCCTAAAAAAAGAAAAAGAGGGCGGGGTTTATCATGTACTCAGAAATGACTACAGCTAGTTCTTCTGCTTC
GTGAATGCTGGTCGCTATACTGGATCAGGTTATTCCGCCGATTCCACGGGTGGGGTGCTACCAAGACTCCTGAAAAAGAAACTGTATGACGAAAAGAAAAAAAAAAAGCTGCTTGAATTCCAACACCGCTTTCTTGTTCTGACAATAGAAAGGGGGATTCCTAAAAAAAGAAAAAGAGGGCGGGGTTTATCATGTACTCAGAATATGACTACAGCTAGTTCTTCTGCTTC
GTGAATGCTGGTCGCTATACTGGATCGGTTATTCCGCCGATTCCACGGGTGGGGTGCTACCAAGACTCCTGAAAAAGAAACTGTATGACGAAAAGAAAAAAAAAAAGCTGCTTGAATTCCAACACCGCTTTCTTGTTCTGACAATAGAAAGGGGGATTCCTAAAAAAAGAAAAAGAGGGCGGGGTTTATCATGTACTCAGAATAATGACTACAGCTAGTTCTTCTGCTTC
GTGAATGCTGGTCGCTATACTGGATCGTTATTCCGCCGATTCCACGGGTGGGGTGCTACCAAGACTCCTGAAAAAGAAACTGTATGACGAAAAGAAAAAAAAAAAGCTGCTTGAATTCCAACACCGCTTTCTTGTTCTGACAATAGAAAGGGGGATTCCTAAAAAAAGAAAAAGAGGGCGGGGTTTATCATGTACTCAGAATATATGACTACAGCTAGTTCTTCTGCTTC
GTGAATGCTGGTCGCTATACTGGATCTTATTCCGCCGATTCCACGGGTGGGGTGCTACCAAGACTCCTGAAAAAGAAACTGTATGACGAAAAGAAAAAAAAAAAGCTGCTTGAATTCCAACACCGCTTTCTTGTTCTGACAATAGAAAGGGGGATTCCTAAAAAAAGAAAAAGAGGGCGGGGTTTATCATGTACTCAGAATATGATGACTACAGCTAGTTCTTCTGCTTC
GTGAATGCTGGTCGCTATACTGGATCTATTCCGCCGATTCCACGGGTGGGGTGCTACCAAGACTCCTGAAAAAGAAACTGTATGACGAAAAGAAAAAAAAAAAGCTGCTTGAATTCCAACACCGCTTTCTTGTTCTGACAATAGAAAGGGGGATTCCTAAAAAAAGAAAAAGAGGGCGGGGTTTATCATGTACTCAGAATATGAATGACTACAGCTAGTTCTTCTGCTTC
GTGAATGCTGGTCGCTATACTGGATCATTCCGCCGATTCCACGGGTGGGGTGCTACCAAGACTCCTGAAAAAGAAACTGTATGACGAAAAGAAAAAAAAAAAGCTGCTTGAATTCCAACACCGCTTTCTTGTTCTGACAATAGAAAGGGGGATTCCTAAAAAAAGAAAAAGAGGGCGGGGTTTATCATGTACTCAGAATATGAAATGACTACAGCTAGTTCTTCTGCTTC
GTGAATGCTGGTCGCTATACTGGATCTTCCGCCGATTCCACGGGTGGGGTGCTACCAAGACTCCTGAAAAAGAAACTGTATGACGAAAAGAAAAAAAAAAAGCTGCTTGAATTCCAACACCGCTTTCTTGTTCTGACAATAGAAAGGGGGATTCCTAAAAAAAGAAAAAGAGGGCGGGGTTTATCATGTACTCAGAATATGAAAATGACTACAGCTAGTTCTTCTGCTTC
GTGAATGCTGGTCGCTATACTGGATCTCCGCCGATTCCACGGGTGGGGTGCTACCAAGACTCCTGAAAAAGAAACTGTATGACGAAAAGAAAAAAAAAAAGCTGCTTGAATTCCAACACCGCTTTCTTGTTCTGACAATAGAAAGGGGGATTCCTAAAAAAAGAAAAAGAGGGCGGGGTTTATCATGTACTCAGAATATGAAAAATGACTACAGCTAGTTCTTCTGCTTC
GTGAATGCTGGTCGCTATACTGGATCCCGCCGATTCCACGGGTGGGGTGCTACCAAGACTCCTGAAAAAGAAACTGTATGACGAAAAGAAAAAAAAAAAGCTGCTTGAATTCCAACACCGCTTTCTTGTTCTGACAATAGAAAGGGGGATTCCTAAAAAAAGAAAAAGAGGGCGGGGTTTATCATGTACTCAGAATATGAAAACATGACTACAGCTAGTTCTTCTGCTTC
GTGAATGCTGGTCGCTATACTGGATCCGCCGATTCCACGGGTGGGGTGCTACCAAGACTCCTGAAAAAGAAACTGTATGACGAAAAGAAAAAAAAAAAGCTGCTTGAATTCCAACACCGCTTTCTTGTTCTGACAATAGAAAGGGGGATTCCTAAAAAAAGAAAAAGAGGGCGGGGTTTATCATGTACTCAGAATATGAAAACGATGACTACAGCTAGTTCTTCTGCTTC
GTGAATGCTGGTCGCTATACTGGATCGCCGATTCCACGGGTGGGGTGCTACCAAGACTCCTGAAAAAGAAACTGTATGACGAAAAGAAAAAAAAAAAGCTGCTTGAATTCCAACACCGCTTTCTTGTTCTGACAATAGAAAGGGGGATTCCTAAAAAAAGAAAAAGAGGGCGGGGTTTATCATGTACTCAGAATATGAAAACGTATGACTACAGCTAGTTCTTCTGCTTC
GTGAATGCTGGTCGCTATACTGGATCCCGATTCCACGGGTGGGGTGCTACCAAGACTCCTGAAAAAGAAACTGTATGACGAAAAGAAAAAAAAAAAGCTGCTTGAATTCCAACACCGCTTTCTTGTTCTGACAATAGAAAGGGGGATTCCTAAAAAAAGAAAAAGAGGGCGGGGTTTATCATGTACTCAGAATATGAAAACGTGATGACTACAGCTAGTTCTTCTGCTTC
GTGAATGCTGGTCGCTATACTGGATCCGATTCCACGGGTGGGGTGCTACCAAGACTCCTGAAAAAGAAACTGTATGACGAAAAGAAAAAAAAAAAGCTGCTTGAATTCCAACACCGCTTTCTTGTTCTGACAATAGAAAGGGGGATTCCTAAAAAAAGAAAAAGAGGGCGGGGTTTATCATGTACTCAGAATATGAAAACGTGTATGACTACAGCTAGTTCTTCTGCTTC
GTGAATGCTGGTCGCTATACTGGATCGATTCCACGGGTGGGGTGCTACCAAGACTCCTGAAAAAGAAACTGTATGACGAAAAGAAAAAAAAAAAGCTGCTTGAATTCCAACACCGCTTTCTTGTTCTGACAATAGAAAGGGGGATTCCTAAAAAAAGAAAAAGAGGGCGGGGTTTATCATGTACTCAGAATATGAAAACGTGTCATGACTACAGCTAGTTCTTCTGCTTC
GTGAATGCTGGTCGCTATACTGGATCATTCCACGGGTGGGGTGCTACCAAGACTCCTGAAAAAGAAACTGTATGACGAAAAGAAAAAAAAAAAGCTGCTTGAATTCCAACACCGCTTTCTTGTTCTGACAATAGAAAGGGGGATTCCTAAAAAAAGAAAAAGAGGGCGGGGTTTATCATGTACTCAGAATATGAAAACGTGTCGATGACTACAGCTAGTTCTTCTGCTTC
GTGAATGCTGGTCGCTATACTGGATCTTCCACGGGTGGGGTGCTACCAAGACTCCTGAAAAAGAAACTGTATGACGAAAAGAAAAAAAAAAAGCTGCTTGAATTCCAACACCGCTTTCTTGTTCTGACAATAGAAAGGGGGATTCCTAAAAAAAGAAAAAGAGGGCGGGGTTTATCATGTACTCAGAATATGAAAACGTGTCGAATGACTACAGCTAGTTCTTCTGCTTC
GTGAATGCTGGTCGCTATACTGGATCTCCACGGGTGGGGTGCTACCAAGACTCCTGAAAAAGAAACTGTATGACGAAAAGAAAAAAAAAAAGCTGCTTGAATTCCAACACCGCTTTCTTGTTCTGACAATAGAAAGGGGGATTCCTAAAAAAAGAAAAAGAGGGCGGGGTTTATCATGTACTCAGAATATGAAAACGTGTCGAAATGACTACAGCTAGTTCTTCTGCTTC
GTGAATGCTGGTCGCTATACTGGATCCCACGGGTGGGGTGCTACCAAGACTCCTGAAAAAGAAACTGTATGACGAAAAGAAAAAAAAAAAGCTGCTTGAATTCCAACACCGCTTTCTTGTTCTGACAATAGAAAGGGGGATTCCTAAAAAAAGAAAAAGAGGGCGGGGTTTATCATGTACTCAGAATATGAAAACGTGTCGAACATGACTACAGCTAGTTCTTCTGCTTC
GTGAATGCTGGTCGCTATACTGGATCCACGGGTGGGGTGCTACCAAGACTCCTGAAAAAGAAACTGTATGACGAAAAGAAAAAAAAAAAGCTGCTTGAATTCCAACACCGCTTTCTTGTTCTGACAATAGAAAGGGGGATTCCTAAAAAAAGAAAAAGAGGGCGGGGTTTATCATGTACTCAGAATATGAAAACGTGTCGAACGATGACTACAGCTAGTTCTTCTGCTTC
GTGAATGCTGGTCGCTATACTGGATCACGGGTGGGGTGCTACCAAGACTCCTGAAAAAGAAACTGTATGACGAAAAGAAAAAAAAAAAGCTGCTTGAATTCCAACACCGCTTTCTTGTTCTGACAATAGAAAGGGGGATTCCTAAAAAAAGAAAAAGAGGGCGGGGTTTATCATGTACTCAGAATATGAAAACGTGTCGAACGGATGACTACAGCTAGTTCTTCTGCTTC
GTGAATGCTGGTCGCTATACTGGATCCGGGTGGGGTGCTACCAAGACTCCTGAAAAAGAAACTGTATGACGAAAAGAAAAAAAAAAAGCTGCTTGAATTCCAACACCGCTTTCTTGTTCTGACAATAGAAAGGGGGATTCCTAAAAAAAGAAAAAGAGGGCGGGGTTTATCATGTACTCAGAATATGAAAACGTGTCGAACGGGATGACTACAGCTAGTTCTTCTGCTTC
GTGAATGCTGGTCGCTATACTGGATCGGGTGGGGTGCTACCAAGACTCCTGAAAAAGAAACTGTATGACGAAAAGAAAAAAAAAAAGCTGCTTGAATTCCAACACCGCTTTCTTGTTCTGACAATAGAAAGGGGGATTCCTAAAAAAAGAAAAAGAGGGCGGGGTTTATCATGTACTCAGAATATGAAAACGTGTCGAACGGGGATGACTACAGCTAGTTCTTCTGCTTC
GTGAATGCTGGTCGCTATACTGGATCGGTGGGGTGCTACCAAGACTCCTGAAAAAGAAACTGTATGACGAAAAGAAAAAAAAAAAGCTGCTTGAATTCCAACACCGCTTTCTTGTTCTGACAATAGAAAGGGGGATTCCTAAAAAAAGAAAAAGAGGGCGGGGTTTATCATGTACTCAGAATATGAAAACGTGTCGAACGGGGAATGACTACAGCTAGTTCTTCTGCTTC
GTGAATGCTGGTCGCTATACTGGATCGTGGGGTGCTACCAAGACTCCTGAAAAAGAAACTGTATGACGAAAAGAAAAAAAAAAAGCTGCTTGAATTCCAACACCGCTTTCTTGTTCTGACAATAGAAAGGGGGATTCCTAAAAAAAGAAAAAGAGGGCGGGGTTTATCATGTACTCAGAATATGAAAACGTGTCGAACGGGGATATGACTACAGCTAGTTCTTCTGCTTC
GTGAATGCTGGTCGCTATACTGGATCTGGGGTGCTACCAAGACTCCTGAAAAAGAAACTGTATGACGAAAAGAAAAAAAAAAAGCTGCTTGAATTCCAACACCGCTTTCTTGTTCTGACAATAGAAAGGGGGATTCCTAAAAAAAGAAAAAGAGGGCGGGGTTTATCATGTACTCAGAATATGAAAACGTGTCGAACGGGGATGATGACTACAGCTAGTTCTTCTGCTTC
GTGAATGCTGGTCGCTATACTGGATCGGGGTGCTACCAAGACTCCTGAAAAAGAAACTGTATGACGAAAAGAAAAAAAAAAAGCTGCTTGAATTCCAACACCGCTTTCTTGTTCTGACAATAGAAAGGGGGATTCCTAAAAAAAGAAAAAGAGGGCGGGGTTTATCATGTACTCAGAATATGAAAACGTGTCGAACGGGGATGAATGACTACAGCTAGTTCTTCTGCTTC
GTGAATGCTGGTCGCTATACTGGATCGGGTGCTACCAAGACTCCTGAAAAAGAAACTGTATGACGAAAAGAAAAAAAAAAAGCTGCTTGAATTCCAACACCGCTTTCTTGTTCTGACAATAGAAAGGGGGATTCCTAAAAAAAGAAAAAGAGGGCGGGGTTTATCATGTACTCAGAATATGAAAACGTGTCGAACGGGGATGACATGACTACAGCTAGTTCTTCTGCTTC
GTGAATGCTGGTCGCTATACTGGATCGGTGCTACCAAGACTCCTGAAAAAGAAACTGTATGACGAAAAGAAAAAAAAAAAGCTGCTTGAATTCCAACACCGCTTTCTTGTTCTGACAATAGAAAGGGGGATTCCTAAAAAAAGAAAAAGAGGGCGGGGTTTATCATGTACTCAGAATATGAAAACGTGTCGAACGGGGATGACTATGACTACAGCTAGTTCTTCTGCTTC
GTGAATGCTGGTCGCTATACTGGATCGTGCTACCAAGACTCCTGAAAAAGAAACTGTATGACGAAAAGAAAAAAAAAAAGCTGCTTGAATTCCAACACCGCTTTCTTGTTCTGACAATAGAAAGGGGGATTCCTAAAAAAAGAAAAAGAGGGCGGGGTTTATCATGTACTCAGAATATGAAAACGTGTCGAACGGGGATGACTTATGACTACAGCTAGTTCTTCTGCTTC
GTGAATGCTGGTCGCTATACTGGATCTGCTACCAAGACTCCTGAAAAAGAAACTGTATGACGAAAAGAAAAAAAAAAAGCTGCTTGAATTCCAACACCGCTTTCTTGTTCTGACAATAGAAAGGGGGATTCCTAAAAAAAGAAAAAGAGGGCGGGGTTTATCATGTACTCAGAATATGAAAACGTGTCGAACGGGGATGACTTCATGACTACAGCTAGTTCTTCTGCTTC
GTGAATGCTGGTCGCTATACTGGATCGCTACCAAGACTCCTGAAAAAGAAACTGTATGACGAAAAGAAAAAAAAAAAGCTGCTTGAATTCCAACACCGCTTTCTTGTTCTGACAATAGAAAGGGGGATTCCTAAAAAAAGAAAAAGAGGGCGGGGTTTATCATGTACTCAGAATATGAAAACGTGTCGAACGGGGATGACTTCTATGACTACAGCTAGTTCTTCTGCTTC
GTGAATGCTGGTCGCTATACTGGATCCTACCAAGACTCCTGAAAAAGAAACTGTATGACGAAAAGAAAAAAAAAAAGCTGCTTGAATTCCAACACCGCTTTCTTGTTCTGACAATAGAAAGGGGGATTCCTAAAAAAAGAAAAAGAGGGCGGGGTTTATCATGTACTCAGAATATGAAAACGTGTCGAACGGGGATGACTTCTTATGACTACAGCTAGTTCTTCTGCTTC
GTGAATGCTGGTCGCTATACTGGATCTACCAAGACTCCTGAAAAAGAAACTGTATGACGAAAAGAAAAAAAAAAAGCTGCTTGAATTCCAACACCGCTTTCTTGTTCTGACAATAGAAAGGGGGATTCCTAAAAAAAGAAAAAGAGGGCGGGGTTTATCATGTACTCAGAATATGAAAACGTGTCGAACGGGGATGACTTCTTCATGACTACAGCTAGTTCTTCTGCTTC
GTGAATGCTGGTCGCTATACTGGATCACCAAGACTCCTGAAAAAGAAACTGTATGACGAAAAGAAAAAAAAAAAGCTGCTTGAATTCCAACACCGCTTTCTTGTTCTGACAATAGAAAGGGGGATTCCTAAAAAAAGAAAAAGAGGGCGGGGTTTATCATGTACTCAGAATATGAAAACGTGTCGAACGGGGATGACTTCTTCTATGACTACAGCTAGTTCTTCTGCTTC
GTGAATGCTGGTCGCTATACTGGATCCCAAGACTCCTGAAAAAGAAACTGTATGACGAAAAGAAAAAAAAAAAGCTGCTTGAATTCCAACACCGCTTTCTTGTTCTGACAATAGAAAGGGGGATTCCTAAAAAAAGAAAAAGAGGGCGGGGTTTATCATGTACTCAGAATATGAAAACGTGTCGAACGGGGATGACTTCTTCTGATGACTACAGCTAGTTCTTCTGCTTC
GTGAATGCTGGTCGCTATACTGGATCCAAGACTCCTGAAAAAGAAACTGTATGACGAAAAGAAAAAAAAAAAGCTGCTTGAATTCCAACACCGCTTTCTTGTTCTGACAATAGAAAGGGGGATTCCTAAAAAAAGAAAAAGAGGGCGGGGTTTATCATGTACTCAGAATATGAAAACGTGTCGAACGGGGATGACTTCTTCTGCATGACTACAGCTAGTTCTTCTGCTTC
GTGAATGCTGGTCGCTATACTGGATCAAGACTCCTGAAAAAGAAACTGTATGACGAAAAGAAAAAAAAAAAGCTGCTTGAATTCCAACACCGCTTTCTTGTTCTGACAATAGAAAGGGGGATTCCTAAAAAAAGAAAAAGAGGGCGGGGTTTATCATGTACTCAGAATATGAAAACGTGTCGAACGGGGATGACTTCTTCTGCTATGACTACAGCTAGTTCTTCTGCTTC
GTGAATGCTGGTCGCTATACTGGATCAGACTCCTGAAAAAGAAACTGTATGACGAAAAGAAAAAAAAAAAGCTGCTTGAATTCCAACACCGCTTTCTTGTTCTGACAATAGAAAGGGGGATTCCTAAAAAAAGAAAAAGAGGGCGGGGTTTATCATGTACTCAGAATATGAAAACGTGTCGAACGGGGATGACTTCTTCTGCTTATGACTACAGCTAGTTCTTCTGCTTC
GTGAATGCTGGTCGCTATACTGGATCGACTCCTGAAAAAGAAACTGTATGACGAAAAGAAAAAAAAAAAGCTGCTTGAATTCCAACACCGCTTTCTTGTTCTGACAATAGAAAGGGGGATTCCTAAAAAAAGAAAAAGAGGGCGGGGTTTATCATGTACTCAGAATATGAAAACGTGTCGAACGGGGATGACTTCTTCTGCTTCATGACTACAGCTAGTTCTTCTGCTTC
GTGAATGCTGGTCGCTATACTGGATCACTCCTGAAAAAGAAACTGTATGACGAAAAGAAAAAAAAAAAGCTGCTTGAATTCCAACACCGCTTTCTTGTTCTGACAATAGAAAGGGGGATTCCTAAAAAAAGAAAAAGAGGGCGGGGTTTATCATGTACTCAGAATATGAAAACGTGTCGAACGGGGATGACTTCTTCTGCTTCTATGACTACAGCTAGTTCTTCTGCTTC
GTGAATGCTGGTCGCTATACTGGATCCTCCTGAAAAAGAAACTGTATGACGAAAAGAAAAAAAAAAAGCTGCTTGAATTCCAACACCGCTTTCTTGTTCTGACAATAGAAAGGGGGATTCCTAAAAAAAGAAAAAGAGGGCGGGGTTTATCATGTACTCAGAATATGAAAACGTGTCGAACGGGGATGACTTCTTCTGCTTCTTATGACTACAGCTAGTTCTTCTGCTTC
GTGAATGCTGGTCGCTATACTGGATCTCCTGAAAAAGAAACTGTATGACGAAAAGAAAAAAAAAAAGCTGCTTGAATTCCAACACCGCTTTCTTGTTCTGACAATAGAAAGGGGGATTCCTAAAAAAAGAAAAAGAGGGCGGGGTTTATCATGTACTCAGAATATGAAAACGTGTCGAACGGGGATGACTTCTTCTGCTTCTTTATGACTACAGCTAGTTCTTCTGCTTC
GTGAATGCTGGTCGCTATACTGGATCCCTGAAAAAGAAACTGTATGACGAAAAGAAAAAAAAAAAGCTGCTTGAATTCCAACACCGCTTTCTTGTTCTGACAATAGAAAGGGGGATTCCTAAAAAAAGAAAAAGAGGGCGGGGTTTATCATGTACTCAGAATATGAAAACGTGTCGAACGGGGATGACTTCTTCTGCTTCTTTAATGACTACAGCTAGTTCTTCTGCTTC
GTGAATGCTGGTCGCTATACTGGATCCTGAAAAAGAAACTGTATGACGAAAAGAAAAAAAAAAAGCTGCTTGAATTCCAACACCGCTTTCTTGTTCTGACAATAGAAAGGGGGATTCCTAAAAAAAGAAAAAGAGGGCGGGGTTTATCATGTACTCAGAATATGAAAACGTGTCGAACGGGGATGACTTCTTCTGCTTCTTTACATGACTACAGCTAGTTCTTCTGCTTC
GTGAATGCTGGTCGCTATACTGGATCTGAAAAAGAAACTGTATGACGAAAAGAAAAAAAAAAAGCTGCTTGAATTCCAACACCGCTTTCTTGTTCTGACAATAGAAAGGGGGATTCCTAAAAAAAGAAAAAGAGGGCGGGGTTTATCATGTACTCAGAATATGAAAACGTGTCGAACGGGGATGACTTCTTCTGCTTCTTTACTATGACTACAGCTAGTTCTTCTGCTTC
GTGAATGCTGGTCGCTATACTGGATCGAAAAAGAAACTGTATGACGAAAAGAAAAAAAAAAAGCTGCTTGAATTCCAACACCGCTTTCTTGTTCTGACAATAGAAAGGGGGATTCCTAAAAAAAGAAAAAGAGGGCGGGGTTTATCATGTACTCAGAATATGAAAACGTGTCGAACGGGGATGACTTCTTCTGCTTCTTTACTTATGACTACAGCTAGTTCTTCTGCTTC
GTGAATGCTGGTCGCTATACTGGATCAAAAAGAAACTGTATGACGAAAAGAAAAAAAAAAAGCTGCTTGAATTCCAACACCGCTTTCTTGTTCTGACAATAGAAAGGGGGATTCCTAAAAAAAGAAAAAGAGGGCGGGGTTTATCATGTACTCAGAATATGAAAACGTGTCGAACGGGGATGACTTCTTCTGCTTCTTTACTTCATGACTACAGCTAGTTCTTCTGCTTC
GTGAATGCTGGTCGCTATACTGGATCAAAAGAAACTGTATGACGAAAAGAAAAAAAAAAAGCTGCTTGAATTCCAACACCGCTTTCTTGTTCTGACAATAGAAAGGGGGATTCCTAAAAAAAGAAAAAGAGGGCGGGGTTTATCATGTACTCAGAATATGAAAACGTGTCGAACGGGGATGACTTCTTCTGCTTCTTTACTTCTATGACTACAGCTAGTTCTTCTGCTTC
GTGAATGCTGGTCGCTATACTGGATCAAAGAAACTGTATGACGAAAAGAAAAAAAAAAAGCTGCTTGAATTCCAACACCGCTTTCTTGTTCTGACAATAGAAAGGGGGATTCCTAAAAAAAGAAAAAGAGGGCGGGGTTTATCATGTACTCAGAATATGAAAACGTGTCGAACGGGGATGACTTCTTCTGCTTCTTTACTTCTTATGACTACAGCTAGTTCTTCTGCTTC
GTGAATGCTGGTCGCTATACTGGATCAAGAAACTGTATGACGAAAAGAAAAAAAAAAAGCTGCTTGAATTCCAACACCGCTTTCTTGTTCTGACAATAGAAAGGGGGATTCCTAAAAAAAGAAAAAGAGGGCGGGGTTTATCATGTACTCAGAATATGAAAACGTGTCGAACGGGGATGACTTCTTCTGCTTCTTTACTTCTTTATGACTACAGCTAGTTCTTCTGCTTC
GTGAATGCTGGTCGCTATACTGGATCAGAAACTGTATGACGAAAAGAAAAAAAAAAAGCTGCTTGAATTCCAACACCGCTTTCTTGTTCTGACAATAGAAAGGGGGATTCCTAAAAAAAGAAAAAGAGGGCGGGGTTTATCATGTACTCAGAATATGAAAACGTGTCGAACGGGGATGACTTCTTCTGCTTCTTTACTTCTTTCATGACTACAGCTAGTTCTTCTGCTTC
GTGAATGCTGGTCGCTATACTGGATCGAAACTGTATGACGAAAAGAAAAAAAAAAAGCTGCTTGAATTCCAACACCGCTTTCTTGTTCTGACAATAGAAAGGGGGATTCCTAAAAAAAGAAAAAGAGGGCGGGGTTTATCATGTACTCAGAATATGAAAACGTGTCGAACGGGGATGACTTCTTCTGCTTCTTTACTTCTTTCTATGACTACAGCTAGTTCTTCTGCTTC
GTGAATGCTGGTCGCTATACTGGATCAAACTGTATGACGAAAAGAAAAAAAAAAAGCTGCTTGAATTCCAACACCGCTTTCTTGTTCTGACAATAGAAAGGGGGATTCCTAAAAAAAGAAAAAGAGGGCGGGGTTTATCATGTACTCAGAATATGAAAACGTGTCGAACGGGGATGACTTCTTCTGCTTCTTTACTTCTTTCTAATGACTACAGCTAGTTCTTCTGCTTC
GTGAATGCTGGTCGCTATACTGGATCAACTGTATGACGAAAAGAAAAAAAAAAAGCTGCTTGAATTCCAACACCGCTTTCTTGTTCTGACAATAGAAAGGGGGATTCCTAAAAAAAGAAAAAGAGGGCGGGGTTTATCATGTACTCAGAATATGAAAACGTGTCGAACGGGGATGACTTCTTCTGCTTCTTTACTTCTTTCTATATGACTACAGCTAGTTCTTCTGCTTC
GTGAATGCTGGTCGCTATACTGGATCACTGTATGACGAAAAGAAAAAAAAAAAGCTGCTTGAATTCCAACACCGCTTTCTTGTTCTGACAATAGAAAGGGGGATTCCTAAAAAAAGAAAAAGAGGGCGGGGTTTATCATGTACTCAGAATATGAAAACGTGTCGAACGGGGATGACTTCTTCTGCTTCTTTACTTCTTTCTATTATGACTACAGCTAGTTCTTCTGCTTC
GTGAATGCTGGTCGCTATACTGGATCCTGTATGACGAAAAGAAAAAAAAAAAGCTGCTTGAATTCCAACACCGCTTTCTTGTTCTGACAATAGAAAGGGGGATTCCTAAAAAAAGAAAAAGAGGGCGGGGTTTATCATGTACTCAGAATATGAAAACGTGTCGAACGGGGATGACTTCTTCTGCTTCTTTACTTCTTTCTATTTATGACTACAGCTAGTTCTTCTGCTTC
GTGAATGCTGGTCGCTATACTGGATCTGTATGACGAAAAGAAAAAAAAAAAGCTGCTTGAATTCCAACACCGCTTTCTTGTTCTGACAATAGAAAGGGGGATTCCTAAAAAAAGAAAAAGAGGGCGGGGTTTATCATGTACTCAGAATATGAAAACGTGTCGAACGGGGATGACTTCTTCTGCTTCTTTACTTCTTTCTATTTAATGACTACAGCTAGTTCTTCTGCTTC
GTGAATGCTGGTCGCTATACTGGATCGTATGACGAAAAGAAAAAAAAAAAGCTGCTTGAATTCCAACACCGCTTTCTTGTTCTGACAATAGAAAGGGGGATTCCTAAAAAAAGAAAAAGAGGGCGGGGTTTATCATGTACTCAGAATATGAAAACGTGTCGAACGGGGATGACTTCTTCTGCTTCTTTACTTCTTTCTATTTAGATGACTACAGCTAGTTCTTCTGCTTC
GTGAATGCTGGTCGCTATACTGGATCTATGACGAAAAGAAAAAAAAAAAGCTGCTTGAATTCCAACACCGCTTTCTTGTTCTGACAATAGAAAGGGGGATTCCTAAAAAAAGAAAAAGAGGGCGGGGTTTATCATGTACTCAGAATATGAAAACGTGTCGAACGGGGATGACTTCTTCTGCTTCTTTACTTCTTTCTATTTAGAATGACTACAGCTAGTTCTTCTGCTTC
GTGAATGCTGGTCGCTATACTGGATCATGACGAAAAGAAAAAAAAAAAGCTGCTTGAATTCCAACACCGCTTTCTTGTTCTGACAATAGAAAGGGGGATTCCTAAAAAAAGAAAAAGAGGGCGGGGTTTATCATGTACTCAGAATATGAAAACGTGTCGAACGGGGATGACTTCTTCTGCTTCTTTACTTCTTTCTATTTAGAGATGACTACAGCTAGTTCTTCTGCTTC
GTGAATGCTGGTCGCTATACTGGATCTGACGAAAAGAAAAAAAAAAAGCTGCTTGAATTCCAACACCGCTTTCTTGTTCTGACAATAGAAAGGGGGATTCCTAAAAAAAGAAAAAGAGGGCGGGGTTTATCATGTACTCAGAATATGAAAACGTGTCGAACGGGGATGACTTCTTCTGCTTCTTTACTTCTTTCTATTTAGAGTATGACTACAGCTAGTTCTTCTGCTTC
GTGAATGCTGGTCGCTATACTGGATCGACGAAAAGAAAAAAAAAAAGCTGCTTGAATTCCAACACCGCTTTCTTGTTCTGACAATAGAAAGGGGGATTCCTAAAAAAAGAAAAAGAGGGCGGGGTTTATCATGTACTCAGAATATGAAAACGTGTCGAACGGGGATGACTTCTTCTGCTTCTTTACTTCTTTCTATTTAGAGTGATGACTACAGCTAGTTCTTCTGCTTC
GTGAATGCTGGTCGCTATACTGGATCACGAAAAGAAAAAAAAAAAGCTGCTTGAATTCCAACACCGCTTTCTTGTTCTGACAATAGAAAGGGGGATTCCTAAAAAAAGAAAAAGAGGGCGGGGTTTATCATGTACTCAGAATATGAAAACGTGTCGAACGGGGATGACTTCTTCTGCTTCTTTACTTCTTTCTATTTAGAGTGAATGACTACAGCTAGTTCTTCTGCTTC
GTGAATGCTGGTCGCTATACTGGATCCGAAAAGAAAAAAAAAAAGCTGCTTGAATTCCAACACCGCTTTCTTGTTCTGACAATAGAAAGGGGGATTCCTAAAAAAAGAAAAAGAGGGCGGGGTTTATCATGTACTCAGAATATGAAAACGTGTCGAACGGGGATGACTTCTTCTGCTTCTTTACTTCTTTCTATTTAGAGTGACATGACTACAGCTAGTTCTTCTGCTTC
GTGAATGCTGGTCGCTATACTGGATCGAAAAGAAAAAAAAAAAGCTGCTTGAATTCCAACACCGCTTTCTTGTTCTGACAATAGAAAGGGGGATTCCTAAAAAAAGAAAAAGAGGGCGGGGTTTATCATGTACTCAGAATATGAAAACGTGTCGAACGGGGATGACTTCTTCTGCTTCTTTACTTCTTTCTATTTAGAGTGACAATGACTACAGCTAGTTCTTCTGCTTC
GTGAATGCTGGTCGCTATACTGGATCAAAAGAAAAAAAAAAAGCTGCTTGAATTCCAACACCGCTTTCTTGTTCTGACAATAGAAAGGGGGATTCCTAAAAAAAGAAAAAGAGGGCGGGGTTTATCATGTACTCAGAATATGAAAACGTGTCGAACGGGGATGACTTCTTCTGCTTCTTTACTTCTTTCTATTTAGAGTGACAGATGACTACAGCTAGTTCTTCTGCTTC
GTGAATGCTGGTCGCTATACTGGATCAAAGAAAAAAAAAAAGCTGCTTGAATTCCAACACCGCTTTCTTGTTCTGACAATAGAAAGGGGGATTCCTAAAAAAAGAAAAAGAGGGCGGGGTTTATCATGTACTCAGAATATGAAAACGTGTCGAACGGGGATGACTTCTTCTGCTTCTTTACTTCTTTCTATTTAGAGTGACAGTATGACTACAGCTAGTTCTTCTGCTTC
GTGAATGCTGGTCGCTATACTGGATCAAGAAAAAAAAAAAGCTGCTTGAATTCCAACACCGCTTTCTTGTTCTGACAATAGAAAGGGGGATTCCTAAAAAAAGAAAAAGAGGGCGGGGTTTATCATGTACTCAGAATATGAAAACGTGTCGAACGGGGATGACTTCTTCTGCTTCTTTACTTCTTTCTATTTAGAGTGACAGTTATGACTACAGCTAGTTCTTCTGCTTC
GTGAATGCTGGTCGCTATACTGGATCAGAAAAAAAAAAAGCTGCTTGAATTCCAACACCGCTTTCTTGTTCTGACAATAGAAAGGGGGATTCCTAAAAAAAGAAAAAGAGGGCGGGGTTTATCATGTACTCAGAATATGAAAACGTGTCGAACGGGGATGACTTCTTCTGCTTCTTTACTTCTTTCTATTTAGAGTGACAGTTTATGACTACAGCTAGTTCTTCTGCTTC
GTGAATGCTGGTCGCTATACTGGATCGAAAAAAAAAAAGCTGCTTGAATTCCAACACCGCTTTCTTGTTCTGACAATAGAAAGGGGGATTCCTAAAAAAAGAAAAAGAGGGCGGGGTTTATCATGTACTCAGAATATGAAAACGTGTCGAACGGGGATGACTTCTTCTGCTTCTTTACTTCTTTCTATTTAGAGTGACAGTTTTATGACTACAGCTAGTTCTTCTGCTTC
GTGAATGCTGGTCGCTATACTGGATCAAAAAAAAAAAGCTGCTTGAATTCCAACACCGCTTTCTTGTTCTGACAATAGAAAGGGGGATTCCTAAAAAAAGAAAAAGAGGGCGGGGTTTATCATGTACTCAGAATATGAAAACGTGTCGAACGGGGATGACTTCTTCTGCTTCTTTACTTCTTTCTATTTAGAGTGACAGTTTTTATGACTACAGCTAGTTCTTCTGCTTC
GTGAATGCTGGTCGCTATACTGGATCAAAAAAAAAAGCTGCTTGAATTCCAACACCGCTTTCTTGTTCTGACAATAGAAAGGGGGATTCCTAAAAAAAGAAAAAGAGGGCGGGGTTTATCATGTACTCAGAATATGAAAACGTGTCGAACGGGGATGACTTCTTCTGCTTCTTTACTTCTTTCTATTTAGAGTGACAGTTTTTTATGACTACAGCTAGTTCTTCTGCTTC
GTGAATGCTGGTCGCTATACTGGATCAAAAAAAAAGCTGCTTGAATTCCAACACCGCTTTCTTGTTCTGACAATAGAAAGGGGGATTCCTAAAAAAAGAAAAAGAGGGCGGGGTTTATCATGTACTCAGAATATGAAAACGTGTCGAACGGGGATGACTTCTTCTGCTTCTTTACTTCTTTCTATTTAGAGTGACAGTTTTTTTATGACTACAGCTAGTTCTTCTGCTTC
GTGAATGCTGGTCGCTATACTGGATCAAAAAAAAGCTGCTTGAATTCCAACACCGCTTTCTTGTTCTGACAATAGAAAGGGGGATTCCTAAAAAAAGAAAAAGAGGGCGGGGTTTATCATGTACTCAGAATATGAAAACGTGTCGAACGGGGATGACTTCTTCTGCTTCTTTACTTCTTTCTATTTAGAGTGACAGTTTTTTTAATGACTACAGCTAGTTCTTCTGCTTC
GTGAATGCTGGTCGCTATACTGGATCAAAAAAAGCTGCTTGAATTCCAACACCGCTTTCTTGTTCTGACAATAGAAAGGGGGATTCCTAAAAAAAGAAAAAGAGGGCGGGGTTTATCATGTACTCAGAATATGAAAACGTGTCGAACGGGGATGACTTCTTCTGCTTCTTTACTTCTTTCTATTTAGAGTGACAGTTTTTTTATATGACTACAGCTAGTTCTTCTGCTTC
GTGAATGCTGGTCGCTATACTGGATCAAAAAAGCTGCTTGAATTCCAACACCGCTTTCTTGTTCTGACAATAGAAAGGGGGATTCCTAAAAAAAGAAAAAGAGGGCGGGGTTTATCATGTACTCAGAATATGAAAACGTGTCGAACGGGGATGACTTCTTCTGCTTCTTTACTTCTTTCTATTTAGAGTGACAGTTTTTTTATTATGACTACAGCTAGTTCTTCTGCTTC
GTGAATGCTGGTCGCTATACTGGATCAAAAAGCTGCTTGAATTCCAACACCGCTTTCTTGTTCTGACAATAGAAAGGGGGATTCCTAAAAAAAGAAAAAGAGGGCGGGGTTTATCATGTACTCAGAATATGAAAACGTGTCGAACGGGGATGACTTCTTCTGCTTCTTTACTTCTTTCTATTTAGAGTGACAGTTTTTTTATTTATGACTACAGCTAGTTCTTCTGCTTC
GTGAATGCTGGTCGCTATACTGGATCAAAAGCTGCTTGAATTCCAACACCGCTTTCTTGTTCTGACAATAGAAAGGGGGATTCCTAAAAAAAGAAAAAGAGGGCGGGGTTTATCATGTACTCAGAATATGAAAACGTGTCGAACGGGGATGACTTCTTCTGCTTCTTTACTTCTTTCTATTTAGAGTGACAGTTTTTTTATTTGATGACTACAGCTAGTTCTTCTGCTTC
GTGAATGCTGGTCGCTATACTGGATCAAAGCTGCTTGAATTCCAACACCGCTTTCTTGTTCTGACAATAGAAAGGGGGATTCCTAAAAAAAGAAAAAGAGGGCGGGGTTTATCATGTACTCAGAATATGAAAACGTGTCGAACGGGGATGACTTCTTCTGCTTCTTTACTTCTTTCTATTTAGAGTGACAGTTTTTTTATTTGTATGACTACAGCTAGTTCTTCTGCTTC
GTGAATGCTGGTCGCTATACTGGATCAAGCTGCTTGAATTCCAACACCGCTTTCTTGTTCTGACAATAGAAAGGGGGATTCCTAAAAAAAGAAAAAGAGGGCGGGGTTTATCATGTACTCAGAATATGAAAACGTGTCGAACGGGGATGACTTCTTCTGCTTCTTTACTTCTTTCTATTTAGAGTGACAGTTTTTTTATTTGTTATGACTACAGCTAGTTCTTCTGCTTC
GTGAATGCTGGTCGCTATACTGGATCAGCTGCTTGAATTCCAACACCGCTTTCTTGTTCTGACAATAGAAAGGGGGATTCCTAAAAAAAGAAAAAGAGGGCGGGGTTTATCATGTACTCAGAATATGAAAACGTGTCGAACGGGGATGACTTCTTCTGCTTCTTTACTTCTTTCTATTTAGAGTGACAGTTTTTTTATTTGTTTATGACTACAGCTAGTTCTTCTGCTTC
GTGAATGCTGGTCGCTATACTGGATCGCTGCTTGAATTCCAACACCGCTTTCTTGTTCTGACAATAGAAAGGGGGATTCCTAAAAAAAGAAAAAGAGGGCGGGGTTTATCATGTACTCAGAATATGAAAACGTGTCGAACGGGGATGACTTCTTCTGCTTCTTTACTTCTTTCTATTTAGAGTGACAGTTTTTTTATTTGTTTTATGACTACAGCTAGTTCTTCTGCTTC
GTGAATGCTGGTCGCTATACTGGATCCTGCTTGAATTCCAACACCGCTTTCTTGTTCTGACAATAGAAAGGGGGATTCCTAAAAAAAGAAAAAGAGGGCGGGGTTTATCATGTACTCAGAATATGAAAACGTGTCGAACGGGGATGACTTCTTCTGCTTCTTTACTTCTTTCTATTTAGAGTGACAGTTTTTTTATTTGTTTTGATGACTACAGCTAGTTCTTCTGCTTC
GTGAATGCTGGTCGCTATACTGGATCTGCTTGAATTCCAACACCGCTTTCTTGTTCTGACAATAGAAAGGGGGATTCCTAAAAAAAGAAAAAGAGGGCGGGGTTTATCATGTACTCAGAATATGAAAACGTGTCGAACGGGGATGACTTCTTCTGCTTCTTTACTTCTTTCTATTTAGAGTGACAGTTTTTTTATTTGTTTTGCATGACTACAGCTAGTTCTTCTGCTTC
GTGAATGCTGGTCGCTATACTGGATCGCTTGAATTCCAACACCGCTTTCTTGTTCTGACAATAGAAAGGGGGATTCCTAAAAAAAGAAAAAGAGGGCGGGGTTTATCATGTACTCAGAATATGAAAACGTGTCGAACGGGGATGACTTCTTCTGCTTCTTTACTTCTTTCTATTTAGAGTGACAGTTTTTTTATTTGTTTTGCTATGACTACAGCTAGTTCTTCTGCTTC
GTGAATGCTGGTCGCTATACTGGATCCTTGAATTCCAACACCGCTTTCTTGTTCTGACAATAGAAAGGGGGATTCCTAAAAAAAGAAAAAGAGGGCGGGGTTTATCATGTACTCAGAATATGAAAACGTGTCGAACGGGGATGACTTCTTCTGCTTCTTTACTTCTTTCTATTTAGAGTGACAGTTTTTTTATTTGTTTTGCTAATGACTACAGCTAGTTCTTCTGCTTC
GTGAATGCTGGTCGCTATACTGGATCTTGAATTCCAACACCGCTTTCTTGTTCTGACAATAGAAAGGGGGATTCCTAAAAAAAGAAAAAGAGGGCGGGGTTTATCATGTACTCAGAATATGAAAACGTGTCGAACGGGGATGACTTCTTCTGCTTCTTTACTTCTTTCTATTTAGAGTGACAGTTTTTTTATTTGTTTTGCTAAATGACTACAGCTAGTTCTTCTGCTTC
GTGAATGCTGGTCGCTATACTGGATCTGAATTCCAACACCGCTTTCTTGTTCTGACAATAGAAAGGGGGATTCCTAAAAAAAGAAAAAGAGGGCGGGGTTTATCATGTACTCAGAATATGAAAACGTGTCGAACGGGGATGACTTCTTCTGCTTCTTTACTTCTTTCTATTTAGAGTGACAGTTTTTTTATTTGTTTTGCTAACATGACTACAGCTAGTTCTTCTGCTTC
GTGAATGCTGGTCGCTATACTGGATCGAATTCCAACACCGCTTTCTTGTTCTGACAATAGAAAGGGGGATTCCTAAAAAAAGAAAAAGAGGGCGGGGTTTATCATGTACTCAGAATATGAAAACGTGTCGAACGGGGATGACTTCTTCTGCTTCTTTACTTCTTTCTATTTAGAGTGACAGTTTTTTTATTTGTTTTGCTAACTATGACTACAGCTAGTTCTTCTGCTTC
GTGAATGCTGGTCGCTATACTGGATCAATTCCAACACCGCTTTCTTGTTCTGACAATAGAAAGGGGGATTCCTAAAAAAAGAAAAAGAGGGCGGGGTTTATCATGTACTCAGAATATGAAAACGTGTCGAACGGGGATGACTTCTTCTGCTTCTTTACTTCTTTCTATTTAGAGTGACAGTTTTTTTATTTGTTTTGCTAACTTATGACTACAGCTAGTTCTTCTGCTTC
GTGAATGCTGGTCGCTATACTGGATCATTCCAACACCGCTTTCTTGTTCTGACAATAGAAAGGGGGATTCCTAAAAAAAGAAAAAGAGGGCGGGGTTTATCATGTACTCAGAATATGAAAACGTGTCGAACGGGGATGACTTCTTCTGCTTCTTTACTTCTTTCTATTTAGAGTGACAGTTTTTTTATTTGTTTTGCTAACTTGATGACTACAGCTAGTTCTTCTGCTTC
GTGAATGCTGGTCGCTATACTGGATCTTCCAACACCGCTTTCTTGTTCTGACAATAGAAAGGGGGATTCCTAAAAAAAGAAAAAGAGGGCGGGGTTTATCATGTACTCAGAATATGAAAACGTGTCGAACGGGGATGACTTCTTCTGCTTCTTTACTTCTTTCTATTTAGAGTGACAGTTTTTTTATTTGTTTTGCTAACTTGTATGACTACAGCTAGTTCTTCTGCTTC
GTGAATGCTGGTCGCTATACTGGATCTCCAACACCGCTTTCTTGTTCTGACAATAGAAAGGGGGATTCCTAAAAAAAGAAAAAGAGGGCGGGGTTTATCATGTACTCAGAATATGAAAACGTGTCGAACGGGGATGACTTCTTCTGCTTCTTTACTTCTTTCTATTTAGAGTGACAGTTTTTTTATTTGTTTTGCTAACTTGTTATGACTACAGCTAGTTCTTCTGCTTC
GTGAATGCTGGTCGCTATACTGGATCCCAACACCGCTTTCTTGTTCTGACAATAGAAAGGGGGATTCCTAAAAAAAGAAAAAGAGGGCGGGGTTTATCATGTACTCAGAATATGAAAACGTGTCGAACGGGGATGACTTCTTCTGCTTCTTTACTTCTTTCTATTTAGAGTGACAGTTTTTTTATTTGTTTTGCTAACTTGTTTATGACTACAGCTAGTTCTTCTGCTTC
GTGAATGCTGGTCGCTATACTGGATCCAACACCGCTTTCTTGTTCTGACAATAGAAAGGGGGATTCCTAAAAAAAGAAAAAGAGGGCGGGGTTTATCATGTACTCAGAATATGAAAACGTGTCGAACGGGGATGACTTCTTCTGCTTCTTTACTTCTTTCTATTTAGAGTGACAGTTTTTTTATTTGTTTTGCTAACTTGTTTAATGACTACAGCTAGTTCTTCTGCTTC
GTGAATGCTGGTCGCTATACTGGATCAACACCGCTTTCTTGTTCTGACAATAGAAAGGGGGATTCCTAAAAAAAGAAAAAGAGGGCGGGGTTTATCATGTACTCAGAATATGAAAACGTGTCGAACGGGGATGACTTCTTCTGCTTCTTTACTTCTTTCTATTTAGAGTGACAGTTTTTTTATTTGTTTTGCTAACTTGTTTATATGACTACAGCTAGTTCTTCTGCTTC
GTGAATGCTGGTCGCTATACTGGATCACACCGCTTTCTTGTTCTGACAATAGAAAGGGGGATTCCTAAAAAAAGAAAAAGAGGGCGGGGTTTATCATGTACTCAGAATATGAAAACGTGTCGAACGGGGATGACTTCTTCTGCTTCTTTACTTCTTTCTATTTAGAGTGACAGTTTTTTTATTTGTTTTGCTAACTTGTTTATTATGACTACAGCTAGTTCTTCTGCTTC
GTGAATGCTGGTCGCTATACTGGATCCACCGCTTTCTTGTTCTGACAATAGAAAGGGGGATTCCTAAAAAAAGAAAAAGAGGGCGGGGTTTATCATGTACTCAGAATATGAAAACGTGTCGAACGGGGATGACTTCTTCTGCTTCTTTACTTCTTTCTATTTAGAGTGACAGTTTTTTTATTTGTTTTGCTAACTTGTTTATTTATGACTACAGCTAGTTCTTCTGCTTC
GTGAATGCTGGTCGCTATACTGGATCACCGCTTTCTTGTTCTGACAATAGAAAGGGGGATTCCTAAAAAAAGAAAAAGAGGGCGGGGTTTATCATGTACTCAGAATATGAAAACGTGTCGAACGGGGATGACTTCTTCTGCTTCTTTACTTCTTTCTATTTAGAGTGACAGTTTTTTTATTTGTTTTGCTAACTTGTTTATTTAATGACTACAGCTAGTTCTTCTGCTTC
GTGAATGCTGGTCGCTATACTGGATCCCGCTTTCTTGTTCTGACAATAGAAAGGGGGATTCCTAAAAAAAGAAAAAGAGGGCGGGGTTTATCATGTACTCAGAATATGAAAACGTGTCGAACGGGGATGACTTCTTCTGCTTCTTTACTTCTTTCTATTTAGAGTGACAGTTTTTTTATTTGTTTTGCTAACTTGTTTATTTATATGACTACAGCTAGTTCTTCTGCTTC
GTGAATGCTGGTCGCTATACTGGATCCGCTTTCTTGTTCTGACAATAGAAAGGGGGATTCCTAAAAAAAGAAAAAGAGGGCGGGGTTTATCATGTACTCAGAATATGAAAACGTGTCGAACGGGGATGACTTCTTCTGCTTCTTTACTTCTTTCTATTTAGAGTGACAGTTTTTTTATTTGTTTTGCTAACTTGTTTATTTATTATGACTACAGCTAGTTCTTCTGCTTC
GTGAATGCTGGTCGCTATACTGGATCGCTTTCTTGTTCTGACAATAGAAAGGGGGATTCCTAAAAAAAGAAAAAGAGGGCGGGGTTTATCATGTACTCAGAATATGAAAACGTGTCGAACGGGGATGACTTCTTCTGCTTCTTTACTTCTTTCTATTTAGAGTGACAGTTTTTTTATTTGTTTTGCTAACTTGTTTATTTATTAATGACTACAGCTAGTTCTTCTGCTTC
GTGAATGCTGGTCGCTATACTGGATCCTTTCTTGTTCTGACAATAGAAAGGGGGATTCCTAAAAAAAGAAAAAGAGGGCGGGGTTTATCATGTACTCAGAATATGAAAACGTGTCGAACGGGGATGACTTCTTCTGCTTCTTTACTTCTTTCTATTTAGAGTGACAGTTTTTTTATTTGTTTTGCTAACTTGTTTATTTATTAAATGACTACAGCTAGTTCTTCTGCTTC
GTGAATGCTGGTCGCTATACTGGATCTTTCTTGTTCTGACAATAGAAAGGGGGATTCCTAAAAAAAGAAAAAGAGGGCGGGGTTTATCATGTACTCAGAATATGAAAACGTGTCGAACGGGGATGACTTCTTCTGCTTCTTTACTTCTTTCTATTTAGAGTGACAGTTTTTTTATTTGTTTTGCTAACTTGTTTATTTATTAATATGACTACAGCTAGTTCTTCTGCTTC
GTGAATGCTGGTCGCTATACTGGATCTTCTTGTTCTGACAATAGAAAGGGGGATTCCTAAAAAAAGAAAAAGAGGGCGGGGTTTATCATGTACTCAGAATATGAAAACGTGTCGAACGGGGATGACTTCTTCTGCTTCTTTACTTCTTTCTATTTAGAGTGACAGTTTTTTTATTTGTTTTGCTAACTTGTTTATTTATTAATTATGACTACAGCTAGTTCTTCTGCTTC
GTGAATGCTGGTCGCTATACTGGATCTCTTGTTCTGACAATAGAAAGGGGGATTCCTAAAAAAAGAAAAAGAGGGCGGGGTTTATCATGTACTCAGAATATGAAAACGTGTCGAACGGGGATGACTTCTTCTGCTTCTTTACTTCTTTCTATTTAGAGTGACAGTTTTTTTATTTGTTTTGCTAACTTGTTTATTTATTAATTTATGACTACAGCTAGTTCTTCTGCTTC
GTGAATGCTGGTCGCTATACTGGATCCTTGTTCTGACAATAGAAAGGGGGATTCCTAAAAAAAGAAAAAGAGGGCGGGGTTTATCATGTACTCAGAATATGAAAACGTGTCGAACGGGGATGACTTCTTCTGCTTCTTTACTTCTTTCTATTTAGAGTGACAGTTTTTTTATTTGTTTTGCTAACTTGTTTATTTATTAATTTCATGACTACAGCTAGTTCTTCTGCTTC
GTGAATGCTGGTCGCTATACTGGATCTTGTTCTGACAATAGAAAGGGGGATTCCTAAAAAAAGAAAAAGAGGGCGGGGTTTATCATGTACTCAGAATATGAAAACGTGTCGAACGGGGATGACTTCTTCTGCTTCTTTACTTCTTTCTATTTAGAGTGACAGTTTTTTTATTTGTTTTGCTAACTTGTTTATTTATTAATTTCTATGACTACAGCTAGTTCTTCTGCTTC
GTGAATGCTGGTCGCTATACTGGATCTGTTCTGACAATAGAAAGGGGGATTCCTAAAAAAAGAAAAAGAGGGCGGGGTTTATCATGTACTCAGAATATGAAAACGTGTCGAACGGGGATGACTTCTTCTGCTTCTTTACTTCTTTCTATTTAGAGTGACAGTTTTTTTATTTGTTTTGCTAACTTGTTTATTTATTAATTTCTTATGACTACAGCTAGTTCTTCTGCTTC
GTGAATGCTGGTCGCTATACTGGATCGTTCTGACAATAGAAAGGGGGATTCCTAAAAAAAGAAAAAGAGGGCGGGGTTTATCATGTACTCAGAATATGAAAACGTGTCGAACGGGGATGACTTCTTCTGCTTCTTTACTTCTTTCTATTTAGAGTGACAGTTTTTTTATTTGTTTTGCTAACTTGTTTATTTATTAATTTCTTGATGACTACAGCTAGTTCTTCTGCTTC
GTGAATGCTGGTCGCTATACTGGATCTTCTGACAATAGAAAGGGGGATTCCTAAAAAAAGAAAAAGAGGGCGGGGTTTATCATGTACTCAGAATATGAAAACGTGTCGAACGGGGATGACTTCTTCTGCTTCTTTACTTCTTTCTATTTAGAGTGACAGTTTTTTTATTTGTTTTGCTAACTTGTTTATTTATTAATTTCTTGTATGACTACAGCTAGTTCTTCTGCTTC
GTGAATGCTGGTCGCTATACTGGATCTCTGACAATAGAAAGGGGGATTCCTAAAAAAAGAAAAAGAGGGCGGGGTTTATCATGTACTCAGAATATGAAAACGTGTCGAACGGGGATGACTTCTTCTGCTTCTTTACTTCTTTCTATTTAGAGTGACAGTTTTTTTATTTGTTTTGCTAACTTGTTTATTTATTAATTTCTTGTTATGACTACAGCTAGTTCTTCTGCTTC
GTGAATGCTGGTCGCTATACTGGATCCTGACAATAGAAAGGGGGATTCCTAAAAAAAGAAAAAGAGGGCGGGGTTTATCATGTACTCAGAATATGAAAACGTGTCGAACGGGGATGACTTCTTCTGCTTCTTTACTTCTTTCTATTTAGAGTGACAGTTTTTTTATTTGTTTTGCTAACTTGTTTATTTATTAATTTCTTGTTTATGACTACAGCTAGTTCTTCTGCTTC
GTGAATGCTGGTCGCTATACTGGATCTGACAATAGAAAGGGGGATTCCTAAAAAAAGAAAAAGAGGGCGGGGTTTATCATGTACTCAGAATATGAAAACGTGTCGAACGGGGATGACTTCTTCTGCTTCTTTACTTCTTTCTATTTAGAGTGACAGTTTTTTTATTTGTTTTGCTAACTTGTTTATTTATTAATTTCTTGTTTGATGACTACAGCTAGTTCTTCTGCTTC
GTGAATGCTGGTCGCTATACTGGATCGACAATAGAAAGGGGGATTCCTAAAAAAAGAAAAAGAGGGCGGGGTTTATCATGTACTCAGAATATGAAAACGTGTCGAACGGGGATGACTTCTTCTGCTTCTTTACTTCTTTCTATTTAGAGTGACAGTTTTTTTATTTGTTTTGCTAACTTGTTTATTTATTAATTTCTTGTTTGCATGACTACAGCTAGTTCTTCTGCTTC
GTGAATGCTGGTCGCTATACTGGATCACAATAGAAAGGGGGATTCCTAAAAAAAGAAAAAGAGGGCGGGGTTTATCATGTACTCAGAATATGAAAACGTGTCGAACGGGGATGACTTCTTCTGCTTCTTTACTTCTTTCTATTTAGAGTGACAGTTTTTTTATTTGTTTTGCTAACTTGTTTATTTATTAATTTCTTGTTTGCTATGACTACAGCTAGTTCTTCTGCTTC
GTGAATGCTGGTCGCTATACTGGATCCAATAGAAAGGGGGATTCCTAAAAAAAGAAAAAGAGGGCGGGGTTTATCATGTACTCAGAATATGAAAACGTGTCGAACGGGGATGACTTCTTCTGCTTCTTTACTTCTTTCTATTTAGAGTGACAGTTTTTTTATTTGTTTTGCTAACTTGTTTATTTATTAATTTCTTGTTTGCTCATGACTACAGCTAGTTCTTCTGCTTC
GTGAATGCTGGTCGCTATACTGGATCAATAGAAAGGGGGATTCCTAAAAAAAGAAAAAGAGGGCGGGGTTTATCATGTACTCAGAATATGAAAACGTGTCGAACGGGGATGACTTCTTCTGCTTCTTTACTTCTTTCTATTTAGAGTGACAGTTTTTTTATTTGTTTTGCTAACTTGTTTATTTATTAATTTCTTGTTTGCTCCATGACTACAGCTAGTTCTTCTGCTTC
GTGAATGCTGGTCGCTATACTGGATCATAGAAAGGGGGATTCCTAAAAAAAGAAAAAGAGGGCGGGGTTTATCATGTACTCAGAATATGAAAACGTGTCGAACGGGGATGACTTCTTCTGCTTCTTTACTTCTTTCTATTTAGAGTGACAGTTTTTTTATTTGTTTTGCTAACTTGTTTATTTATTAATTTCTTGTTTGCTCCTATGACTACAGCTAGTTCTTCTGCTTC
GTGAATGCTGGTCGCTATACTGGATCTAGAAAGGGGGATTCCTAAAAAAAGAAAAAGAGGGCGGGGTTTATCATGTACTCAGAATATGAAAACGTGTCGAACGGGGATGACTTCTTCTGCTTCTTTACTTCTTTCTATTTAGAGTGACAGTTTTTTTATTTGTTTTGCTAACTTGTTTATTTATTAATTTCTTGTTTGCTCCTTATGACTACAGCTAGTTCTTCTGCTTC
GTGAATGCTGGTCGCTATACTGGATCAGAAAGGGGGATTCCTAAAAAAAGAAAAAGAGGGCGGGGTTTATCATGTACTCAGAATATGAAAACGTGTCGAACGGGGATGACTTCTTCTGCTTCTTTACTTCTTTCTATTTAGAGTGACAGTTTTTTTATTTGTTTTGCTAACTTGTTTATTTATTAATTTCTTGTTTGCTCCTTCATGACTACAGCTAGTTCTTCTGCTTC
GTGAATGCTGGTCGCTATACTGGATCGAAAGGGGGATTCCTAAAAAAAGAAAAAGAGGGCGGGGTTTATCATGTACTCAGAATATGAAAACGTGTCGAACGGGGATGACTTCTTCTGCTTCTTTACTTCTTTCTATTTAGAGTGACAGTTTTTTTATTTGTTTTGCTAACTTGTTTATTTATTAATTTCTTGTTTGCTCCTTCAATGACTACAGCTAGTTCTTCTGCTTC
GTGAATGCTGGTCGCTATACTGGATCAAAGGGGGATTCCTAAAAAAAGAAAAAGAGGGCGGGGTTTATCATGTACTCAGAATATGAAAACGTGTCGAACGGGGATGACTTCTTCTGCTTCTTTACTTCTTTCTATTTAGAGTGACAGTTTTTTTATTTGTTTTGCTAACTTGTTTATTTATTAATTTCTTGTTTGCTCCTTCAGATGACTACAGCTAGTTCTTCTGCTTC
GTGAATGCTGGTCGCTATACTGGATCAAGGGGGATTCCTAAAAAAAGAAAAAGAGGGCGGGGTTTATCATGTACTCAGAATATGAAAACGTGTCGAACGGGGATGACTTCTTCTGCTTCTTTACTTCTTTCTATTTAGAGTGACAGTTTTTTTATTTGTTTTGCTAACTTGTTTATTTATTAATTTCTTGTTTGCTCCTTCAGTATGACTACAGCTAGTTCTTCTGCTTC
GTGAATGCTGGTCGCTATACTGGATCAGGGGGATTCCTAAAAAAAGAAAAAGAGGGCGGGGTTTATCATGTACTCAGAATATGAAAACGTGTCGAACGGGGATGACTTCTTCTGCTTCTTTACTTCTTTCTATTTAGAGTGACAGTTTTTTTATTTGTTTTGCTAACTTGTTTATTTATTAATTTCTTGTTTGCTCCTTCAGTTATGACTACAGCTAGTTCTTCTGCTTC
GTGAATGCTGGTCGCTATACTGGATCGGGGGATTCCTAAAAAAAGAAAAAGAGGGCGGGGTTTATCATGTACTCAGAATATGAAAACGTGTCGAACGGGGATGACTTCTTCTGCTTCTTTACTTCTTTCTATTTAGAGTGACAGTTTTTTTATTTGTTTTGCTAACTTGTTTATTTATTAATTTCTTGTTTGCTCCTTCAGTTAATGACTACAGCTAGTTCTTCTGCTTC
GTGAATGCTGGTCGCTATACTGGATCGGGGATTCCTAAAAAAAGAAAAAGAGGGCGGGGTTTATCATGTACTCAGAATATGAAAACGTGTCGAACGGGGATGACTTCTTCTGCTTCTTTACTTCTTTCTATTTAGAGTGACAGTTTTTTTATTTGTTTTGCTAACTTGTTTATTTATTAATTTCTTGTTTGCTCCTTCAGTTACATGACTACAGCTAGTTCTTCTGCTTC
GTGAATGCTGGTCGCTATACTGGATCGGGATTCCTAAAAAAAGAAAAAGAGGGCGGGGTTTATCATGTACTCAGAATATGAAAACGTGTCGAACGGGGATGACTTCTTCTGCTTCTTTACTTCTTTCTATTTAGAGTGACAGTTTTTTTATTTGTTTTGCTAACTTGTTTATTTATTAATTTCTTGTTTGCTCCTTCAGTTACCATGACTACAGCTAGTTCTTCTGCTTC
GTGAATGCTGGTCGCTATACTGGATCGGATTCCTAAAAAAAGAAAAAGAGGGCGGGGTTTATCATGTACTCAGAATATGAAAACGTGTCGAACGGGGATGACTTCTTCTGCTTCTTTACTTCTTTCTATTTAGAGTGACAGTTTTTTTATTTGTTTTGCTAACTTGTTTATTTATTAATTTCTTGTTTGCTCCTTCAGTTACCTATGACTACAGCTAGTTCTTCTGCTTC
GTGAATGCTGGTCGCTATACTGGATCGATTCCTAAAAAAAGAAAAAGAGGGCGGGGTTTATCATGTACTCAGAATATGAAAACGTGTCGAACGGGGATGACTTCTTCTGCTTCTTTACTTCTTTCTATTTAGAGTGACAGTTTTTTTATTTGTTTTGCTAACTTGTTTATTTATTAATTTCTTGTTTGCTCCTTCAGTTACCTAATGACTACAGCTAGTTCTTCTGCTTC
GTGAATGCTGGTCGCTATACTGGATCATTCCTAAAAAAAGAAAAAGAGGGCGGGGTTTATCATGTACTCAGAATATGAAAACGTGTCGAACGGGGATGACTTCTTCTGCTTCTTTACTTCTTTCTATTTAGAGTGACAGTTTTTTTATTTGTTTTGCTAACTTGTTTATTTATTAATTTCTTGTTTGCTCCTTCAGTTACCTACATGACTACAGCTAGTTCTTCTGCTTC
GTGAATGCTGGTCGCTATACTGGATCTTCCTAAAAAAAGAAAAAGAGGGCGGGGTTTATCATGTACTCAGAATATGAAAACGTGTCGAACGGGGATGACTTCTTCTGCTTCTTTACTTCTTTCTATTTAGAGTGACAGTTTTTTTATTTGTTTTGCTAACTTGTTTATTTATTAATTTCTTGTTTGCTCCTTCAGTTACCTACCATGACTACAGCTAGTTCTTCTGCTTC
GTGAATGCTGGTCGCTATACTGGATCTCCTAAAAAAAGAAAAAGAGGGCGGGGTTTATCATGTACTCAGAATATGAAAACGTGTCGAACGGGGATGACTTCTTCTGCTTCTTTACTTCTTTCTATTTAGAGTGACAGTTTTTTTATTTGTTTTGCTAACTTGTTTATTTATTAATTTCTTGTTTGCTCCTTCAGTTACCTACCAATGACTACAGCTAGTTCTTCTGCTTC
GTGAATGCTGGTCGCTATACTGGATCCCTAAAAAAAGAAAAAGAGGGCGGGGTTTATCATGTACTCAGAATATGAAAACGTGTCGAACGGGGATGACTTCTTCTGCTTCTTTACTTCTTTCTATTTAGAGTGACAGTTTTTTTATTTGTTTTGCTAACTTGTTTATTTATTAATTTCTTGTTTGCTCCTTCAGTTACCTACCACATGACTACAGCTAGTTCTTCTGCTTC
GTGAATGCTGGTCGCTATACTGGATCCTAAAAAAAGAAAAAGAGGGCGGGGTTTATCATGTACTCAGAATATGAAAACGTGTCGAACGGGGATGACTTCTTCTGCTTCTTTACTTCTTTCTATTTAGAGTGACAGTTTTTTTATTTGTTTTGCTAACTTGTTTATTTATTAATTTCTTGTTTGCTCCTTCAGTTACCTACCACGATGACTACAGCTAGTTCTTCTGCTTC
GTGAATGCTGGTCGCTATACTGGATCTAAAAAAAGAAAAAGAGGGCGGGGTTTATCATGTACTCAGAATATGAAAACGTGTCGAACGGGGATGACTTCTTCTGCTTCTTTACTTCTTTCTATTTAGAGTGACAGTTTTTTTATTTGTTTTGCTAACTTGTTTATTTATTAATTTCTTGTTTGCTCCTTCAGTTACCTACCACGAATGACTACAGCTAGTTCTTCTGCTTC
GTGAATGCTGGTCGCTATACTGGATCAAAAAAAGAAAAAGAGGGCGGGGTTTATCATGTACTCAGAATATGAAAACGTGTCGAACGGGGATGACTTCTTCTGCTTCTTTACTTCTTTCTATTTAGAGTGACAGTTTTTTTATTTGTTTTGCTAACTTGTTTATTTATTAATTTCTTGTTTGCTCCTTCAGTTACCTACCACGACATGACTACAGCTAGTTCTTCTGCTTC
GTGAATGCTGGTCGCTATACTGGATCAAAAAAGAAAAAGAGGGCGGGGTTTATCATGTACTCAGAATATGAAAACGTGTCGAACGGGGATGACTTCTTCTGCTTCTTTACTTCTTTCTATTTAGAGTGACAGTTTTTTTATTTGTTTTGCTAACTTGTTTATTTATTAATTTCTTGTTTGCTCCTTCAGTTACCTACCACGACTATGACTACAGCTAGTTCTTCTGCTTC
GTGAATGCTGGTCGCTATACTGGATCAAAAAGAAAAAGAGGGCGGGGTTTATCATGTACTCAGAATATGAAAACGTGTCGAACGGGGATGACTTCTTCTGCTTCTTTACTTCTTTCTATTTAGAGTGACAGTTTTTTTATTTGTTTTGCTAACTTGTTTATTTATTAATTTCTTGTTTGCTCCTTCAGTTACCTACCACGACTGATGACTACAGCTAGTTCTTCTGCTTC
GTGAATGCTGGTCGCTATACTGGATCAAAAGAAAAAGAGGGCGGGGTTTATCATGTACTCAGAATATGAAAACGTGTCGAACGGGGATGACTTCTTCTGCTTCTTTACTTCTTTCTATTTAGAGTGACAGTTTTTTTATTTGTTTTGCTAACTTGTTTATTTATTAATTTCTTGTTTGCTCCTTCAGTTACCTACCACGACTGTATGACTACAGCTAGTTCTTCTGCTTC
GTGAATGCTGGTCGCTATACTGGATCAAAGAAAAAGAGGGCGGGGTTTATCATGTACTCAGAATATGAAAACGTGTCGAACGGGGATGACTTCTTCTGCTTCTTTACTTCTTTCTATTTAGAGTGACAGTTTTTTTATTTGTTTTGCTAACTTGTTTATTTATTAATTTCTTGTTTGCTCCTTCAGTTACCTACCACGACTGTCATGACTACAGCTAGTTCTTCTGCTTC
GTGAATGCTGGTCGCTATACTGGATCAAGAAAAAGAGGGCGGGGTTTATCATGTACTCAGAATATGAAAACGTGTCGAACGGGGATGACTTCTTCTGCTTCTTTACTTCTTTCTATTTAGAGTGACAGTTTTTTTATTTGTTTTGCTAACTTGTTTATTTATTAATTTCTTGTTTGCTCCTTCAGTTACCTACCACGACTGTCTATGACTACAGCTAGTTCTTCTGCTTC
GTGAATGCTGGTCGCTATACTGGATCAGAAAAAGAGGGCGGGGTTTATCATGTACTCAGAATATGAAAACGTGTCGAACGGGGATGACTTCTTCTGCTTCTTTACTTCTTTCTATTTAGAGTGACAGTTTTTTTATTTGTTTTGCTAACTTGTTTATTTATTAATTTCTTGTTTGCTCCTTCAGTTACCTACCACGACTGTCTCATGACTACAGCTAGTTCTTCTGCTTC
GTGAATGCTGGTCGCTATACTGGATCGAAAAAGAGGGCGGGGTTTATCATGTACTCAGAATATGAAAACGTGTCGAACGGGGATGACTTCTTCTGCTTCTTTACTTCTTTCTATTTAGAGTGACAGTTTTTTTATTTGTTTTGCTAACTTGTTTATTTATTAATTTCTTGTTTGCTCCTTCAGTTACCTACCACGACTGTCTCAATGACTACAGCTAGTTCTTCTGCTTC
GTGAATGCTGGTCGCTATACTGGATCAAAAAGAGGGCGGGGTTTATCATGTACTCAGAATATGAAAACGTGTCGAACGGGGATGACTTCTTCTGCTTCTTTACTTCTTTCTATTTAGAGTGACAGTTTTTTTATTTGTTTTGCTAACTTGTTTATTTATTAATTTCTTGTTTGCTCCTTCAGTTACCTACCACGACTGTCTCAGATGACTACAGCTAGTTCTTCTGCTTC
GTGAATGCTGGTCGCTATACTGGATCAAAAGAGGGCGGGGTTTATCATGTACTCAGAATATGAAAACGTGTCGAACGGGGATGACTTCTTCTGCTTCTTTACTTCTTTCTATTTAGAGTGACAGTTTTTTTATTTGTTTTGCTAACTTGTTTATTTATTAATTTCTTGTTTGCTCCTTCAGTTACCTACCACGACTGTCTCAGCATGACTACAGCTAGTTCTTCTGCTTC
GTGAATGCTGGTCGCTATACTGGATCAAAGAGGGCGGGGTTTATCATGTACTCAGAATATGAAAACGTGTCGAACGGGGATGACTTCTTCTGCTTCTTTACTTCTTTCTATTTAGAGTGACAGTTTTTTTATTTGTTTTGCTAACTTGTTTATTTATTAATTTCTTGTTTGCTCCTTCAGTTACCTACCACGACTGTCTCAGCCATGACTACAGCTAGTTCTTCTGCTTC
GTGAATGCTGGTCGCTATACTGGATCAAGAGGGCGGGGTTTATCATGTACTCAGAATATGAAAACGTGTCGAACGGGGATGACTTCTTCTGCTTCTTTACTTCTTTCTATTTAGAGTGACAGTTTTTTTATTTGTTTTGCTAACTTGTTTATTTATTAATTTCTTGTTTGCTCCTTCAGTTACCTACCACGACTGTCTCAGCCAATGACTACAGCTAGTTCTTCTGCTTC
GTGAATGCTGGTCGCTATACTGGATCAGAGGGCGGGGTTTATCATGTACTCAGAATATGAAAACGTGTCGAACGGGGATGACTTCTTCTGCTTCTTTACTTCTTTCTATTTAGAGTGACAGTTTTTTTATTTGTTTTGCTAACTTGTTTATTTATTAATTTCTTGTTTGCTCCTTCAGTTACCTACCACGACTGTCTCAGCCAAATGACTACAGCTAGTTCTTCTGCTTC
GTGAATGCTGGTCGCTATACTGGATCGAGGGCGGGGTTTATCATGTACTCAGAATATGAAAACGTGTCGAACGGGGATGACTTCTTCTGCTTCTTTACTTCTTTCTATTTAGAGTGACAGTTTTTTTATTTGTTTTGCTAACTTGTTTATTTATTAATTTCTTGTTTGCTCCTTCAGTTACCTACCACGACTGTCTCAGCCAAAATGACTACAGCTAGTTCTTCTGCTTC
GTGAATGCTGGTCGCTATACTGGATCAGGGCGGGGTTTATCATGTACTCAGAATATGAAAACGTGTCGAACGGGGATGACTTCTTCTGCTTCTTTACTTCTTTCTATTTAGAGTGACAGTTTTTTTATTTGTTTTGCTAACTTGTTTATTTATTAATTTCTTGTTTGCTCCTTCAGTTACCTACCACGACTGTCTCAGCCAAACATGACTACAGCTAGTTCTTCTGCTTC
GTGAATGCTGGTCGCTATACTGGATCGGGCGGGGTTTATCATGTACTCAGAATATGAAAACGTGTCGAACGGGGATGACTTCTTCTGCTTCTTTACTTCTTTCTATTTAGAGTGACAGTTTTTTTATTTGTTTTGCTAACTTGTTTATTTATTAATTTCTTGTTTGCTCCTTCAGTTACCTACCACGACTGTCTCAGCCAAACCATGACTACAGCTAGTTCTTCTGCTTC
GTGAATGCTGGTCGCTATACTGGATCGGCGGGGTTTATCATGTACTCAGAATATGAAAACGTGTCGAACGGGGATGACTTCTTCTGCTTCTTTACTTCTTTCTATTTAGAGTGACAGTTTTTTTATTTGTTTTGCTAACTTGTTTATTTATTAATTTCTTGTTTGCTCCTTCAGTTACCTACCACGACTGTCTCAGCCAAACCGATGACTACAGCTAGTTCTTCTGCTTC
GTGAATGCTGGTCGCTATACTGGATCGCGGGGTTTATCATGTACTCAGAATATGAAAACGTGTCGAACGGGGATGACTTCTTCTGCTTCTTTACTTCTTTCTATTTAGAGTGACAGTTTTTTTATTTGTTTTGCTAACTTGTTTATTTATTAATTTCTTGTTTGCTCCTTCAGTTACCTACCACGACTGTCTCAGCCAAACCGCATGACTACAGCTAGTTCTTCTGCTTC
GTGAATGCTGGTCGCTATACTGGATCCGGGGTTTATCATGTACTCAGAATATGAAAACGTGTCGAACGGGGATGACTTCTTCTGCTTCTTTACTTCTTTCTATTTAGAGTGACAGTTTTTTTATTTGTTTTGCTAACTTGTTTATTTATTAATTTCTTGTTTGCTCCTTCAGTTACCTACCACGACTGTCTCAGCCAAACCGCGATGACTACAGCTAGTTCTTCTGCTTC
GTGAATGCTGGTCGCTATACTGGATCGGGGTTTATCATGTACTCAGAATATGAAAACGTGTCGAACGGGGATGACTTCTTCTGCTTCTTTACTTCTTTCTATTTAGAGTGACAGTTTTTTTATTTGTTTTGCTAACTTGTTTATTTATTAATTTCTTGTTTGCTCCTTCAGTTACCTACCACGACTGTCTCAGCCAAACCGCGAATGACTACAGCTAGTTCTTCTGCTTC
GTGAATGCTGGTCGCTATACTGGATCGGGTTTATCATGTACTCAGAATATGAAAACGTGTCGAACGGGGATGACTTCTTCTGCTTCTTTACTTCTTTCTATTTAGAGTGACAGTTTTTTTATTTGTTTTGCTAACTTGTTTATTTATTAATTTCTTGTTTGCTCCTTCAGTTACCTACCACGACTGTCTCAGCCAAACCGCGATATGACTACAGCTAGTTCTTCTGCTTC
GTGAATGCTGGTCGCTATACTGGATCGGTTTATCATGTACTCAGAATATGAAAACGTGTCGAACGGGGATGACTTCTTCTGCTTCTTTACTTCTTTCTATTTAGAGTGACAGTTTTTTTATTTGTTTTGCTAACTTGTTTATTTATTAATTTCTTGTTTGCTCCTTCAGTTACCTACCACGACTGTCTCAGCCAAACCGCGATAATGACTACAGCTAGTTCTTCTGCTTC
GTGAATGCTGGTCGCTATACTGGATCGTTTATCATGTACTCAGAATATGAAAACGTGTCGAACGGGGATGACTTCTTCTGCTTCTTTACTTCTTTCTATTTAGAGTGACAGTTTTTTTATTTGTTTTGCTAACTTGTTTATTTATTAATTTCTTGTTTGCTCCTTCAGTTACCTACCACGACTGTCTCAGCCAAACCGCGATATATGACTACAGCTAGTTCTTCTGCTTC
GTGAATGCTGGTCGCTATACTGGATCTTTATCATGTACTCAGAATATGAAAACGTGTCGAACGGGGATGACTTCTTCTGCTTCTTTACTTCTTTCTATTTAGAGTGACAGTTTTTTTATTTGTTTTGCTAACTTGTTTATTTATTAATTTCTTGTTTGCTCCTTCAGTTACCTACCACGACTGTCTCAGCCAAACCGCGATATTATGACTACAGCTAGTTCTTCTGCTTC
GTGAATGCTGGTCGCTATACTGGATCTTATCATGTACTCAGAATATGAAAACGTGTCGAACGGGGATGACTTCTTCTGCTTCTTTACTTCTTTCTATTTAGAGTGACAGTTTTTTTATTTGTTTTGCTAACTTGTTTATTTATTAATTTCTTGTTTGCTCCTTCAGTTACCTACCACGACTGTCTCAGCCAAACCGCGATATTTATGACTACAGCTAGTTCTTCTGCTTC
GTGAATGCTGGTCGCTATACTGGATCTATCATGTACTCAGAATATGAAAACGTGTCGAACGGGGATGACTTCTTCTGCTTCTTTACTTCTTTCTATTTAGAGTGACAGTTTTTTTATTTGTTTTGCTAACTTGTTTATTTATTAATTTCTTGTTTGCTCCTTCAGTTACCTACCACGACTGTCTCAGCCAAACCGCGATATTTTATGACTACAGCTAGTTCTTCTGCTTC
GTGAATGCTGGTCGCTATACTGGATCATCATGTACTCAGAATATGAAAACGTGTCGAACGGGGATGACTTCTTCTGCTTCTTTACTTCTTTCTATTTAGAGTGACAGTTTTTTTATTTGTTTTGCTAACTTGTTTATTTATTAATTTCTTGTTTGCTCCTTCAGTTACCTACCACGACTGTCTCAGCCAAACCGCGATATTTTCATGACTACAGCTAGTTCTTCTGCTTC
GTGAATGCTGGTCGCTATACTGGATCTCATGTACTCAGAATATGAAAACGTGTCGAACGGGGATGACTTCTTCTGCTTCTTTACTTCTTTCTATTTAGAGTGACAGTTTTTTTATTTGTTTTGCTAACTTGTTTATTTATTAATTTCTTGTTTGCTCCTTCAGTTACCTACCACGACTGTCTCAGCCAAACCGCGATATTTTCAATGACTACAGCTAGTTCTTCTGCTTC
GTGAATGCTGGTCGCTATACTGGATCCATGTACTCAGAATATGAAAACGTGTCGAACGGGGATGACTTCTTCTGCTTCTTTACTTCTTTCTATTTAGAGTGACAGTTTTTTTATTTGTTTTGCTAACTTGTTTATTTATTAATTTCTTGTTTGCTCCTTCAGTTACCTACCACGACTGTCTCAGCCAAACCGCGATATTTTCATATGACTACAGCTAGTTCTTCTGCTTC
GTGAATGCTGGTCGCTATACTGGATCATGTACTCAGAATATGAAAACGTGTCGAACGGGGATGACTTCTTCTGCTTCTTTACTTCTTTCTATTTAGAGTGACAGTTTTTTTATTTGTTTTGCTAACTTGTTTATTTATTAATTTCTTGTTTGCTCCTTCAGTTACCTACCACGACTGTCTCAGCCAAACCGCGATATTTTCATAATGACTACAGCTAGTTCTTCTGCTTC
GTGAATGCTGGTCGCTATACTGGATCTGTACTCAGAATATGAAAACGTGTCGAACGGGGATGACTTCTTCTGCTTCTTTACTTCTTTCTATTTAGAGTGACAGTTTTTTTATTTGTTTTGCTAACTTGTTTATTTATTAATTTCTTGTTTGCTCCTTCAGTTACCTACCACGACTGTCTCAGCCAAACCGCGATATTTTCATACATGACTACAGCTAGTTCTTCTGCTTC
GTGAATGCTGGTCGCTATACTGGATCGTACTCAGAATATGAAAACGTGTCGAACGGGGATGACTTCTTCTGCTTCTTTACTTCTTTCTATTTAGAGTGACAGTTTTTTTATTTGTTTTGCTAACTTGTTTATTTATTAATTTCTTGTTTGCTCCTTCAGTTACCTACCACGACTGTCTCAGCCAAACCGCGATATTTTCATACAATGACTACAGCTAGTTCTTCTGCTTC
GTGAATGCTGGTCGCTATACTGGATCTACTCAGAATATGAAAACGTGTCGAACGGGGATGACTTCTTCTGCTTCTTTACTTCTTTCTATTTAGAGTGACAGTTTTTTTATTTGTTTTGCTAACTTGTTTATTTATTAATTTCTTGTTTGCTCCTTCAGTTACCTACCACGACTGTCTCAGCCAAACCGCGATATTTTCATACAAATGACTACAGCTAGTTCTTCTGCTTC
GTGAATGCTGGTCGCTATACTGGATCACTCAGAATATGAAAACGTGTCGAACGGGGATGACTTCTTCTGCTTCTTTACTTCTTTCTATTTAGAGTGACAGTTTTTTTATTTGTTTTGCTAACTTGTTTATTTATTAATTTCTTGTTTGCTCCTTCAGTTACCTACCACGACTGTCTCAGCCAAACCGCGATATTTTCATACAATATGACTACAGCTAGTTCTTCTGCTTC
GTGAATGCTGGTCGCTATACTGGATCCTCAGAATATGAAAACGTGTCGAACGGGGATGACTTCTTCTGCTTCTTTACTTCTTTCTATTTAGAGTGACAGTTTTTTTATTTGTTTTGCTAACTTGTTTATTTATTAATTTCTTGTTTGCTCCTTCAGTTACCTACCACGACTGTCTCAGCCAAACCGCGATATTTTCATACAATTATGACTACAGCTAGTTCTTCTGCTTC
GTGAATGCTGGTCGCTATACTGGATCTCAGAATATGAAAACGTGTCGAACGGGGATGACTTCTTCTGCTTCTTTACTTCTTTCTATTTAGAGTGACAGTTTTTTTATTTGTTTTGCTAACTTGTTTATTTATTAATTTCTTGTTTGCTCCTTCAGTTACCTACCACGACTGTCTCAGCCAAACCGCGATATTTTCATACAATTGATGACTACAGCTAGTTCTTCTGCTTC
GTGAATGCTGGTCGCTATACTGGATCCAGAATATGAAAACGTGTCGAACGGGGATGACTTCTTCTGCTTCTTTACTTCTTTCTATTTAGAGTGACAGTTTTTTTATTTGTTTTGCTAACTTGTTTATTTATTAATTTCTTGTTTGCTCCTTCAGTTACCTACCACGACTGTCTCAGCCAAACCGCGATATTTTCATACAATTGAATGACTACAGCTAGTTCTTCTGCTTC
GTGAATGCTGGTCGCTATACTGGATCAGAATATGAAAACGTGTCGAACGGGGATGACTTCTTCTGCTTCTTTACTTCTTTCTATTTAGAGTGACAGTTTTTTTATTTGTTTTGCTAACTTGTTTATTTATTAATTTCTTGTTTGCTCCTTCAGTTACCTACCACGACTGTCTCAGCCAAACCGCGATATTTTCATACAATTGACATGACTACAGCTAGTTCTTCTGCTTC
GTGAATGCTGGTCGCTATACTGGATCGAATATGAAAACGTGTCGAACGGGGATGACTTCTTCTGCTTCTTTACTTCTTTCTATTTAGAGTGACAGTTTTTTTATTTGTTTTGCTAACTTGTTTATTTATTAATTTCTTGTTTGCTCCTTCAGTTACCTACCACGACTGTCTCAGCCAAACCGCGATATTTTCATACAATTGACAATGACTACAGCTAGTTCTTCTGCTTC
GTGAATGCTGGTCGCTATACTGGATCAATATGAAAACGTGTCGAACGGGGATGACTTCTTCTGCTTCTTTACTTCTTTCTATTTAGAGTGACAGTTTTTTTATTTGTTTTGCTAACTTGTTTATTTATTAATTTCTTGTTTGCTCCTTCAGTTACCTACCACGACTGTCTCAGCCAAACCGCGATATTTTCATACAATTGACATATGACTACAGCTAGTTCTTCTGCTTC
GTGAATGCTGGTCGCTATACTGGATCATATGAAAACGTGTCGAACGGGGATGACTTCTTCTGCTTCTTTACTTCTTTCTATTTAGAGTGACAGTTTTTTTATTTGTTTTGCTAACTTGTTTATTTATTAATTTCTTGTTTGCTCCTTCAGTTACCTACCACGACTGTCTCAGCCAAACCGCGATATTTTCATACAATTGACATTATGACTACAGCTAGTTCTTCTGCTTC
GTGAATGCTGGTCGCTATACTGGATCTATGAAAACGTGTCGAACGGGGATGACTTCTTCTGCTTCTTTACTTCTTTCTATTTAGAGTGACAGTTTTTTTATTTGTTTTGCTAACTTGTTTATTTATTAATTTCTTGTTTGCTCCTTCAGTTACCTACCACGACTGTCTCAGCCAAACCGCGATATTTTCATACAATTGACATTAATGACTACAGCTAGTTCTTCTGCTTC
GTGAATGCTGGTCGCTATACTGGATCATGAAAACGTGTCGAACGGGGATGACTTCTTCTGCTTCTTTACTTCTTTCTATTTAGAGTGACAGTTTTTTTATTTGTTTTGCTAACTTGTTTATTTATTAATTTCTTGTTTGCTCCTTCAGTTACCTACCACGACTGTCTCAGCCAAACCGCGATATTTTCATACAATTGACATTACATGACTACAGCTAGTTCTTCTGCTTC
GTGAATGCTGGTCGCTATACTGGATCTGAAAACGTGTCGAACGGGGATGACTTCTTCTGCTTCTTTACTTCTTTCTATTTAGAGTGACAGTTTTTTTATTTGTTTTGCTAACTTGTTTATTTATTAATTTCTTGTTTGCTCCTTCAGTTACCTACCACGACTGTCTCAGCCAAACCGCGATATTTTCATACAATTGACATTACAATGACTACAGCTAGTTCTTCTGCTTC
GTGAATGCTGGTCGCTATACTGGATCGAAAACGTGTCGAACGGGGATGACTTCTTCTGCTTCTTTACTTCTTTCTATTTAGAGTGACAGTTTTTTTATTTGTTTTGCTAACTTGTTTATTTATTAATTTCTTGTTTGCTCCTTCAGTTACCTACCACGACTGTCTCAGCCAAACCGCGATATTTTCATACAATTGACATTACAAATGACTACAGCTAGTTCTTCTGCTTC
GTGAATGCTGGTCGCTATACTGGATCAAAACGTGTCGAACGGGGATGACTTCTTCTGCTTCTTTACTTCTTTCTATTTAGAGTGACAGTTTTTTTATTTGTTTTGCTAACTTGTTTATTTATTAATTTCTTGTTTGCTCCTTCAGTTACCTACCACGACTGTCTCAGCCAAACCGCGATATTTTCATACAATTGACATTACAACATGACTACAGCTAGTTCTTCTGCTTC
GTGAATGCTGGTCGCTATACTGGATCAAACGTGTCGAACGGGGATGACTTCTTCTGCTTCTTTACTTCTTTCTATTTAGAGTGACAGTTTTTTTATTTGTTTTGCTAACTTGTTTATTTATTAATTTCTTGTTTGCTCCTTCAGTTACCTACCACGACTGTCTCAGCCAAACCGCGATATTTTCATACAATTGACATTACAACAATGACTACAGCTAGTTCTTCTGCTTC
GTGAATGCTGGTCGCTATACTGGATCAACGTGTCGAACGGGGATGACTTCTTCTGCTTCTTTACTTCTTTCTATTTAGAGTGACAGTTTTTTTATTTGTTTTGCTAACTTGTTTATTTATTAATTTCTTGTTTGCTCCTTCAGTTACCTACCACGACTGTCTCAGCCAAACCGCGATATTTTCATACAATTGACATTACAACAGATGACTACAGCTAGTTCTTCTGCTTC
GTGAATGCTGGTCGCTATACTGGATCACGTGTCGAACGGGGATGACTTCTTCTGCTTCTTTACTTCTTTCTATTTAGAGTGACAGTTTTTTTATTTGTTTTGCTAACTTGTTTATTTATTAATTTCTTGTTTGCTCCTTCAGTTACCTACCACGACTGTCTCAGCCAAACCGCGATATTTTCATACAATTGACATTACAACAGTATGACTACAGCTAGTTCTTCTGCTTC
GTGAATGCTGGTCGCTATACTGGATCCGTGTCGAACGGGGATGACTTCTTCTGCTTCTTTACTTCTTTCTATTTAGAGTGACAGTTTTTTTATTTGTTTTGCTAACTTGTTTATTTATTAATTTCTTGTTTGCTCCTTCAGTTACCTACCACGACTGTCTCAGCCAAACCGCGATATTTTCATACAATTGACATTACAACAGTTATGACTACAGCTAGTTCTTCTGCTTC
GTGAATGCTGGTCGCTATACTGGATCGTGTCGAACGGGGATGACTTCTTCTGCTTCTTTACTTCTTTCTATTTAGAGTGACAGTTTTTTTATTTGTTTTGCTAACTTGTTTATTTATTAATTTCTTGTTTGCTCCTTCAGTTACCTACCACGACTGTCTCAGCCAAACCGCGATATTTTCATACAATTGACATTACAACAGTTCATGACTACAGCTAGTTCTTCTGCTTC
GTGAATGCTGGTCGCTATACTGGATCTGTCGAACGGGGATGACTTCTTCTGCTTCTTTACTTCTTTCTATTTAGAGTGACAGTTTTTTTATTTGTTTTGCTAACTTGTTTATTTATTAATTTCTTGTTTGCTCCTTCAGTTACCTACCACGACTGTCTCAGCCAAACCGCGATATTTTCATACAATTGACATTACAACAGTTCAATGACTACAGCTAGTTCTTCTGCTTC
GTGAATGCTGGTCGCTATACTGGATCGTCGAACGGGGATGACTTCTTCTGCTTCTTTACTTCTTTCTATTTAGAGTGACAGTTTTTTTATTTGTTTTGCTAACTTGTTTATTTATTAATTTCTTGTTTGCTCCTTCAGTTACCTACCACGACTGTCTCAGCCAAACCGCGATATTTTCATACAATTGACATTACAACAGTTCAAATGACTACAGCTAGTTCTTCTGCTTC
GTGAATGCTGGTCGCTATACTGGATCTCGAACGGGGATGACTTCTTCTGCTTCTTTACTTCTTTCTATTTAGAGTGACAGTTTTTTTATTTGTTTTGCTAACTTGTTTATTTATTAATTTCTTGTTTGCTCCTTCAGTTACCTACCACGACTGTCTCAGCCAAACCGCGATATTTTCATACAATTGACATTACAACAGTTCAAAATGACTACAGCTAGTTCTTCTGCTTC
GTGAATGCTGGTCGCTATACTGGATCCGAACGGGGATGACTTCTTCTGCTTCTTTACTTCTTTCTATTTAGAGTGACAGTTTTTTTATTTGTTTTGCTAACTTGTTTATTTATTAATTTCTTGTTTGCTCCTTCAGTTACCTACCACGACTGTCTCAGCCAAACCGCGATATTTTCATACAATTGACATTACAACAGTTCAAAAATGACTACAGCTAGTTCTTCTGCTTC
GTGAATGCTGGTCGCTATACTGGATCGAACGGGGATGACTTCTTCTGCTTCTTTACTTCTTTCTATTTAGAGTGACAGTTTTTTTATTTGTTTTGCTAACTTGTTTATTTATTAATTTCTTGTTTGCTCCTTCAGTTACCTACCACGACTGTCTCAGCCAAACCGCGATATTTTCATACAATTGACATTACAACAGTTCAAAAAATGACTACAGCTAGTTCTTCTGCTTC
GTGAATGCTGGTCGCTATACTGGATCAACGGGGATGACTTCTTCTGCTTCTTTACTTCTTTCTATTTAGAGTGACAGTTTTTTTATTTGTTTTGCTAACTTGTTTATTTATTAATTTCTTGTTTGCTCCTTCAGTTACCTACCACGACTGTCTCAGCCAAACCGCGATATTTTCATACAATTGACATTACAACAGTTCAAAAAGATGACTACAGCTAGTTCTTCTGCTTC
GTGAATGCTGGTCGCTATACTGGATCACGGGGATGACTTCTTCTGCTTCTTTACTTCTTTCTATTTAGAGTGACAGTTTTTTTATTTGTTTTGCTAACTTGTTTATTTATTAATTTCTTGTTTGCTCCTTCAGTTACCTACCACGACTGTCTCAGCCAAACCGCGATATTTTCATACAATTGACATTACAACAGTTCAAAAAGAATGACTACAGCTAGTTCTTCTGCTTC
GTGAATGCTGGTCGCTATACTGGATCCGGGGATGACTTCTTCTGCTTCTTTACTTCTTTCTATTTAGAGTGACAGTTTTTTTATTTGTTTTGCTAACTTGTTTATTTATTAATTTCTTGTTTGCTCCTTCAGTTACCTACCACGACTGTCTCAGCCAAACCGCGATATTTTCATACAATTGACATTACAACAGTTCAAAAAGAAATGACTACAGCTAGTTCTTCTGCTTC
GTGAATGCTGGTCGCTATACTGGATCGGGGATGACTTCTTCTGCTTCTTTACTTCTTTCTATTTAGAGTGACAGTTTTTTTATTTGTTTTGCTAACTTGTTTATTTATTAATTTCTTGTTTGCTCCTTCAGTTACCTACCACGACTGTCTCAGCCAAACCGCGATATTTTCATACAATTGACATTACAACAGTTCAAAAAGAAAATGACTACAGCTAGTTCTTCTGCTTC
GTGAATGCTGGTCGCTATACTGGATCGGGATGACTTCTTCTGCTTCTTTACTTCTTTCTATTTAGAGTGACAGTTTTTTTATTTGTTTTGCTAACTTGTTTATTTATTAATTTCTTGTTTGCTCCTTCAGTTACCTACCACGACTGTCTCAGCCAAACCGCGATATTTTCATACAATTGACATTACAACAGTTCAAAAAGAAAAATGACTACAGCTAGTTCTTCTGCTTC
GTGAATGCTGGTCGCTATACTGGATCGGATGACTTCTTCTGCTTCTTTACTTCTTTCTATTTAGAGTGACAGTTTTTTTATTTGTTTTGCTAACTTGTTTATTTATTAATTTCTTGTTTGCTCCTTCAGTTACCTACCACGACTGTCTCAGCCAAACCGCGATATTTTCATACAATTGACATTACAACAGTTCAAAAAGAAAAAATGACTACAGCTAGTTCTTCTGCTTC
GTGAATGCTGGTCGCTATACTGGATCGATGACTTCTTCTGCTTCTTTACTTCTTTCTATTTAGAGTGACAGTTTTTTTATTTGTTTTGCTAACTTGTTTATTTATTAATTTCTTGTTTGCTCCTTCAGTTACCTACCACGACTGTCTCAGCCAAACCGCGATATTTTCATACAATTGACATTACAACAGTTCAAAAAGAAAAATATGACTACAGCTAGTTCTTCTGCTTC
GTGAATGCTGGTCGCTATACTGGATCATGACTTCTTCTGCTTCTTTACTTCTTTCTATTTAGAGTGACAGTTTTTTTATTTGTTTTGCTAACTTGTTTATTTATTAATTTCTTGTTTGCTCCTTCAGTTACCTACCACGACTGTCTCAGCCAAACCGCGATATTTTCATACAATTGACATTACAACAGTTCAAAAAGAAAAATAATGACTACAGCTAGTTCTTCTGCTTC
GTGAATGCTGGTCGCTATACTGGATCTGACTTCTTCTGCTTCTTTACTTCTTTCTATTTAGAGTGACAGTTTTTTTATTTGTTTTGCTAACTTGTTTATTTATTAATTTCTTGTTTGCTCCTTCAGTTACCTACCACGACTGTCTCAGCCAAACCGCGATATTTTCATACAATTGACATTACAACAGTTCAAAAAGAAAAATACATGACTACAGCTAGTTCTTCTGCTTC
GTGAATGCTGGTCGCTATACTGGATCGACTTCTTCTGCTTCTTTACTTCTTTCTATTTAGAGTGACAGTTTTTTTATTTGTTTTGCTAACTTGTTTATTTATTAATTTCTTGTTTGCTCCTTCAGTTACCTACCACGACTGTCTCAGCCAAACCGCGATATTTTCATACAATTGACATTACAACAGTTCAAAAAGAAAAATACAATGACTACAGCTAGTTCTTCTGCTTC
GTGAATGCTGGTCGCTATACTGGATCACTTCTTCTGCTTCTTTACTTCTTTCTATTTAGAGTGACAGTTTTTTTATTTGTTTTGCTAACTTGTTTATTTATTAATTTCTTGTTTGCTCCTTCAGTTACCTACCACGACTGTCTCAGCCAAACCGCGATATTTTCATACAATTGACATTACAACAGTTCAAAAAGAAAAATACACATGACTACAGCTAGTTCTTCTGCTTC
GTGAATGCTGGTCGCTATACTGGATCCTTCTTCTGCTTCTTTACTTCTTTCTATTTAGAGTGACAGTTTTTTTATTTGTTTTGCTAACTTGTTTATTTATTAATTTCTTGTTTGCTCCTTCAGTTACCTACCACGACTGTCTCAGCCAAACCGCGATATTTTCATACAATTGACATTACAACAGTTCAAAAAGAAAAATACACAATGACTACAGCTAGTTCTTCTGCTTC
GTGAATGCTGGTCGCTATACTGGATCTTCTTCTGCTTCTTTACTTCTTTCTATTTAGAGTGACAGTTTTTTTATTTGTTTTGCTAACTTGTTTATTTATTAATTTCTTGTTTGCTCCTTCAGTTACCTACCACGACTGTCTCAGCCAAACCGCGATATTTTCATACAATTGACATTACAACAGTTCAAAAAGAAAAATACACATATGACTACAGCTAGTTCTTCTGCTTC
GTGAATGCTGGTCGCTATACTGGATCTCTTCTGCTTCTTTACTTCTTTCTATTTAGAGTGACAGTTTTTTTATTTGTTTTGCTAACTTGTTTATTTATTAATTTCTTGTTTGCTCCTTCAGTTACCTACCACGACTGTCTCAGCCAAACCGCGATATTTTCATACAATTGACATTACAACAGTTCAAAAAGAAAAATACACATCATGACTACAGCTAGTTCTTCTGCTTC
GTGAATGCTGGTCGCTATACTGGATCCTTCTGCTTCTTTACTTCTTTCTATTTAGAGTGACAGTTTTTTTATTTGTTTTGCTAACTTGTTTATTTATTAATTTCTTGTTTGCTCCTTCAGTTACCTACCACGACTGTCTCAGCCAAACCGCGATATTTTCATACAATTGACATTACAACAGTTCAAAAAGAAAAATACACATCCATGACTACAGCTAGTTCTTCTGCTTC
GTGAATGCTGGTCGCTATACTGGATCTTCTGCTTCTTTACTTCTTTCTATTTAGAGTGACAGTTTTTTTATTTGTTTTGCTAACTTGTTTATTTATTAATTTCTTGTTTGCTCCTTCAGTTACCTACCACGACTGTCTCAGCCAAACCGCGATATTTTCATACAATTGACATTACAACAGTTCAAAAAGAAAAATACACATCCAATGACTACAGCTAGTTCTTCTGCTTC
GTGAATGCTGGTCGCTATACTGGATCTCTGCTTCTTTACTTCTTTCTATTTAGAGTGACAGTTTTTTTATTTGTTTTGCTAACTTGTTTATTTATTAATTTCTTGTTTGCTCCTTCAGTTACCTACCACGACTGTCTCAGCCAAACCGCGATATTTTCATACAATTGACATTACAACAGTTCAAAAAGAAAAATACACATCCAGATGACTACAGCTAGTTCTTCTGCTTC
GTGAATGCTGGTCGCTATACTGGATCCTGCTTCTTTACTTCTTTCTATTTAGAGTGACAGTTTTTTTATTTGTTTTGCTAACTTGTTTATTTATTAATTTCTTGTTTGCTCCTTCAGTTACCTACCACGACTGTCTCAGCCAAACCGCGATATTTTCATACAATTGACATTACAACAGTTCAAAAAGAAAAATACACATCCAGGATGACTACAGCTAGTTCTTCTGCTTC
GTGAATGCTGGTCGCTATACTGGATCTGCTTCTTTACTTCTTTCTATTTAGAGTGACAGTTTTTTTATTTGTTTTGCTAACTTGTTTATTTATTAATTTCTTGTTTGCTCCTTCAGTTACCTACCACGACTGTCTCAGCCAAACCGCGATATTTTCATACAATTGACATTACAACAGTTCAAAAAGAAAAATACACATCCAGGAATGACTACAGCTAGTTCTTCTGCTTC
GTGAATGCTGGTCGCTATACTGGATCTGCTTCTTTACTTCTTTCTATTTAGAGTGACAGTTTTTTTATTTGTTTTGCTAACTTGTTTATTTATTAATTTCTTGTTTGCTCCTTCAGTTACCTACCACGACTGTCTCAGCCAAACCGCGATATTTTCATACAATTGACATTACAACAGTTCAAAAAGAAAAATACACATCCAGGATATGACTACAGCTAGTTCTTCTGCTTC

## Sheet: 3 bp substitutions
GCGAGGCGACTATAGCTTCTTAGCCGCCGAAGCTATCTCAGCCGGTACAGGCGCTCCTTGAATAACCCCCTCCCCCCCACGCTATTCTTCAAATTCCGATTTCAGCTTCTCTTTGTTTTTCCTTTTTTGGCACCTCGGAAAAACCTCCACGTGTTAGGTTATTCCGCCGATTCCACGGGTGGGGTGCTACCAAGACTCCTGCCTAAACTGAGGGTCGC
GCGAGGCGACTATAGCTTCTTAGCCGCCGAAGCTATCAGGGCCGGTACAGGCGCTCCTTGAATAACCCCCTCCCCCCCACGCTATTCTTCAAATTCCGATTTCAGCTTCTCTTTGTTTTTCCTTTTTTGGCACCTCGGAAAAACCTCCACGTGTTAGGTTATTCCGCCGATTCCACGGGTGGGGTGCTACCAAGACTCCTGCCTAAACTGAGGGTCGC
GCGAGGCGACTATAGCTTCTTAGCCGCCGAAGCTATCCACGCCGGTACAGGCGCTCCTTGAATAACCCCCTCCCCCCCACGCTATTCTTCAAATTCCGATTTCAGCTTCTCTTTGTTTTTCCTTTTTTGGCACCTCGGAAAAACCTCCACGTGTTAGGTTATTCCGCCGATTCCACGGGTGGGGTGCTACCAAGACTCCTGCCTAAACTGAGGGTCGC
GCGAGGCGACTATAGCTTCTTAGCCGCCGAAGCTATCGAACCCGGTACAGGCGCTCCTTGAATAACCCCCTCCCCCCCACGCTATTCTTCAAATTCCGATTTCAGCTTCTCTTTGTTTTTCCTTTTTTGGCACCTCGGAAAAACCTCCACGTGTTAGGTTATTCCGCCGATTCCACGGGTGGGGTGCTACCAAGACTCCTGCCTAAACTGAGGGTCGC
GCGAGGCGACTATAGCTTCTTAGCCGCCGAAGCTATCGCCACCGGTACAGGCGCTCCTTGAATAACCCCCTCCCCCCCACGCTATTCTTCAAATTCCGATTTCAGCTTCTCTTTGTTTTTCCTTTTTTGGCACCTCGGAAAAACCTCCACGTGTTAGGTTATTCCGCCGATTCCACGGGTGGGGTGCTACCAAGACTCCTGCCTAAACTGAGGGTCGC
GCGAGGCGACTATAGCTTCTTAGCCGCCGAAGCTATCGGGTCCGGTACAGGCGCTCCTTGAATAACCCCCTCCCCCCCACGCTATTCTTCAAATTCCGATTTCAGCTTCTCTTTGTTTTTCCTTTTTTGGCACCTCGGAAAAACCTCCACGTGTTAGGTTATTCCGCCGATTCCACGGGTGGGGTGCTACCAAGACTCCTGCCTAAACTGAGGGTCGC
GCGAGGCGACTATAGCTTCTTAGCCGCCGAAGCTATCGTCCACGGTACAGGCGCTCCTTGAATAACCCCCTCCCCCCCACGCTATTCTTCAAATTCCGATTTCAGCTTCTCTTTGTTTTTCCTTTTTTGGCACCTCGGAAAAACCTCCACGTGTTAGGTTATTCCGCCGATTCCACGGGTGGGGTGCTACCAAGACTCCTGCCTAAACTGAGGGTCGC
GCGAGGCGACTATAGCTTCTTAGCCGCCGAAGCTATCGTAAGCGGTACAGGCGCTCCTTGAATAACCCCCTCCCCCCCACGCTATTCTTCAAATTCCGATTTCAGCTTCTCTTTGTTTTTCCTTTTTTGGCACCTCGGAAAAACCTCCACGTGTTAGGTTATTCCGCCGATTCCACGGGTGGGGTGCTACCAAGACTCCTGCCTAAACTGAGGGTCGC
GCGAGGCGACTATAGCTTCTTAGCCGCCGAAGCTATCGTGTTCGGTACAGGCGCTCCTTGAATAACCCCCTCCCCCCCACGCTATTCTTCAAATTCCGATTTCAGCTTCTCTTTGTTTTTCCTTTTTTGGCACCTCGGAAAAACCTCCACGTGTTAGGTTATTCCGCCGATTCCACGGGTGGGGTGCTACCAAGACTCCTGCCTAAACTGAGGGTCGC
GCGAGGCGACTATAGCTTCTTAGCCGCCGAAGCTATCGTTTTGGGTACAGGCGCTCCTTGAATAACCCCCTCCCCCCCACGCTATTCTTCAAATTCCGATTTCAGCTTCTCTTTGTTTTTCCTTTTTTGGCACCTCGGAAAAACCTCCACGTGTTAGGTTATTCCGCCGATTCCACGGGTGGGGTGCTACCAAGACTCCTGCCTAAACTGAGGGTCGC
GCGAGGCGACTATAGCTTCTTAGCCGCCGAAGCTATCGTTAGAGGTACAGGCGCTCCTTGAATAACCCCCTCCCCCCCACGCTATTCTTCAAATTCCGATTTCAGCTTCTCTTTGTTTTTCCTTTTTTGGCACCTCGGAAAAACCTCCACGTGTTAGGTTATTCCGCCGATTCCACGGGTGGGGTGCTACCAAGACTCCTGCCTAAACTGAGGGTCGC
GCGAGGCGACTATAGCTTCTTAGCCGCCGAAGCTATCGTTCATGGTACAGGCGCTCCTTGAATAACCCCCTCCCCCCCACGCTATTCTTCAAATTCCGATTTCAGCTTCTCTTTGTTTTTCCTTTTTTGGCACCTCGGAAAAACCTCCACGTGTTAGGTTATTCCGCCGATTCCACGGGTGGGGTGCTACCAAGACTCCTGCCTAAACTGAGGGTCGC
GCGAGGCGACTATAGCTTCTTAGCCGCCGAAGCTATCGTTGGATGTACAGGCGCTCCTTGAATAACCCCCTCCCCCCCACGCTATTCTTCAAATTCCGATTTCAGCTTCTCTTTGTTTTTCCTTTTTTGGCACCTCGGAAAAACCTCCACGTGTTAGGTTATTCCGCCGATTCCACGGGTGGGGTGCTACCAAGACTCCTGCCTAAACTGAGGGTCGC
GCGAGGCGACTATAGCTTCTTAGCCGCCGAAGCTATCGTTGAGCGTACAGGCGCTCCTTGAATAACCCCCTCCCCCCCACGCTATTCTTCAAATTCCGATTTCAGCTTCTCTTTGTTTTTCCTTTTTTGGCACCTCGGAAAAACCTCCACGTGTTAGGTTATTCCGCCGATTCCACGGGTGGGGTGCTACCAAGACTCCTGCCTAAACTGAGGGTCGC
GCGAGGCGACTATAGCTTCTTAGCCGCCGAAGCTATCGTTGTTAGTACAGGCGCTCCTTGAATAACCCCCTCCCCCCCACGCTATTCTTCAAATTCCGATTTCAGCTTCTCTTTGTTTTTCCTTTTTTGGCACCTCGGAAAAACCTCCACGTGTTAGGTTATTCCGCCGATTCCACGGGTGGGGTGCTACCAAGACTCCTGCCTAAACTGAGGGTCGC
GCGAGGCGACTATAGCTTCTTAGCCGCCGAAGCTATCGTTGCGAATACAGGCGCTCCTTGAATAACCCCCTCCCCCCCACGCTATTCTTCAAATTCCGATTTCAGCTTCTCTTTGTTTTTCCTTTTTTGGCACCTCGGAAAAACCTCCACGTGTTAGGTTATTCCGCCGATTCCACGGGTGGGGTGCTACCAAGACTCCTGCCTAAACTGAGGGTCGC
GCGAGGCGACTATAGCTTCTTAGCCGCCGAAGCTATCGTTGCTCTTACAGGCGCTCCTTGAATAACCCCCTCCCCCCCACGCTATTCTTCAAATTCCGATTTCAGCTTCTCTTTGTTTTTCCTTTTTTGGCACCTCGGAAAAACCTCCACGTGTTAGGTTATTCCGCCGATTCCACGGGTGGGGTGCTACCAAGACTCCTGCCTAAACTGAGGGTCGC
GCGAGGCGACTATAGCTTCTTAGCCGCCGAAGCTATCGTTGCATCTACAGGCGCTCCTTGAATAACCCCCTCCCCCCCACGCTATTCTTCAAATTCCGATTTCAGCTTCTCTTTGTTTTTCCTTTTTTGGCACCTCGGAAAAACCTCCACGTGTTAGGTTATTCCGCCGATTCCACGGGTGGGGTGCTACCAAGACTCCTGCCTAAACTGAGGGTCGC
GCGAGGCGACTATAGCTTCTTAGCCGCCGAAGCTATCGTTGCCACCACAGGCGCTCCTTGAATAACCCCCTCCCCCCCACGCTATTCTTCAAATTCCGATTTCAGCTTCTCTTTGTTTTTCCTTTTTTGGCACCTCGGAAAAACCTCCACGTGTTAGGTTATTCCGCCGATTCCACGGGTGGGGTGCTACCAAGACTCCTGCCTAAACTGAGGGTCGC
GCGAGGCGACTATAGCTTCTTAGCCGCCGAAGCTATCGTTGCCTTGACAGGCGCTCCTTGAATAACCCCCTCCCCCCCACGCTATTCTTCAAATTCCGATTTCAGCTTCTCTTTGTTTTTCCTTTTTTGGCACCTCGGAAAAACCTCCACGTGTTAGGTTATTCCGCCGATTCCACGGGTGGGGTGCTACCAAGACTCCTGCCTAAACTGAGGGTCGC
GCGAGGCGACTATAGCTTCTTAGCCGCCGAAGCTATCGTTGCCCAAACAGGCGCTCCTTGAATAACCCCCTCCCCCCCACGCTATTCTTCAAATTCCGATTTCAGCTTCTCTTTGTTTTTCCTTTTTTGGCACCTCGGAAAAACCTCCACGTGTTAGGTTATTCCGCCGATTCCACGGGTGGGGTGCTACCAAGACTCCTGCCTAAACTGAGGGTCGC
GCGAGGCGACTATAGCTTCTTAGCCGCCGAAGCTATCGTTGCCGTCCCAGGCGCTCCTTGAATAACCCCCTCCCCCCCACGCTATTCTTCAAATTCCGATTTCAGCTTCTCTTTGTTTTTCCTTTTTTGGCACCTCGGAAAAACCTCCACGTGTTAGGTTATTCCGCCGATTCCACGGGTGGGGTGCTACCAAGACTCCTGCCTAAACTGAGGGTCGC
GCGAGGCGACTATAGCTTCTTAGCCGCCGAAGCTATCGTTGCCGCAGCAGGCGCTCCTTGAATAACCCCCTCCCCCCCACGCTATTCTTCAAATTCCGATTTCAGCTTCTCTTTGTTTTTCCTTTTTTGGCACCTCGGAAAAACCTCCACGTGTTAGGTTATTCCGCCGATTCCACGGGTGGGGTGCTACCAAGACTCCTGCCTAAACTGAGGGTCGC
GCGAGGCGACTATAGCTTCTTAGCCGCCGAAGCTATCGTTGCCGAGTCAGGCGCTCCTTGAATAACCCCCTCCCCCCCACGCTATTCTTCAAATTCCGATTTCAGCTTCTCTTTGTTTTTCCTTTTTTGGCACCTCGGAAAAACCTCCACGTGTTAGGTTATTCCGCCGATTCCACGGGTGGGGTGCTACCAAGACTCCTGCCTAAACTGAGGGTCGC
GCGAGGCGACTATAGCTTCTTAGCCGCCGAAGCTATCGTTGCCGGACGAGGCGCTCCTTGAATAACCCCCTCCCCCCCACGCTATTCTTCAAATTCCGATTTCAGCTTCTCTTTGTTTTTCCTTTTTTGGCACCTCGGAAAAACCTCCACGTGTTAGGTTATTCCGCCGATTCCACGGGTGGGGTGCTACCAAGACTCCTGCCTAAACTGAGGGTCGC
GCGAGGCGACTATAGCTTCTTAGCCGCCGAAGCTATCGTTGCCGGGTTAGGCGCTCCTTGAATAACCCCCTCCCCCCCACGCTATTCTTCAAATTCCGATTTCAGCTTCTCTTTGTTTTTCCTTTTTTGGCACCTCGGAAAAACCTCCACGTGTTAGGTTATTCCGCCGATTCCACGGGTGGGGTGCTACCAAGACTCCTGCCTAAACTGAGGGTCGC
GCGAGGCGACTATAGCTTCTTAGCCGCCGAAGCTATCGTTGCCGGCGAAGGCGCTCCTTGAATAACCCCCTCCCCCCCACGCTATTCTTCAAATTCCGATTTCAGCTTCTCTTTGTTTTTCCTTTTTTGGCACCTCGGAAAAACCTCCACGTGTTAGGTTATTCCGCCGATTCCACGGGTGGGGTGCTACCAAGACTCCTGCCTAAACTGAGGGTCGC
GCGAGGCGACTATAGCTTCTTAGCCGCCGAAGCTATCGTTGCCGGTTTTGGCGCTCCTTGAATAACCCCCTCCCCCCCACGCTATTCTTCAAATTCCGATTTCAGCTTCTCTTTGTTTTTCCTTTTTTGGCACCTCGGAAAAACCTCCACGTGTTAGGTTATTCCGCCGATTCCACGGGTGGGGTGCTACCAAGACTCCTGCCTAAACTGAGGGTCGC
GCGAGGCGACTATAGCTTCTTAGCCGCCGAAGCTATCGTTGCCGGTGGCGGCGCTCCTTGAATAACCCCCTCCCCCCCACGCTATTCTTCAAATTCCGATTTCAGCTTCTCTTTGTTTTTCCTTTTTTGGCACCTCGGAAAAACCTCCACGTGTTAGGTTATTCCGCCGATTCCACGGGTGGGGTGCTACCAAGACTCCTGCCTAAACTGAGGGTCGC
GCGAGGCGACTATAGCTTCTTAGCCGCCGAAGCTATCGTTGCCGGTCAGGGCGCTCCTTGAATAACCCCCTCCCCCCCACGCTATTCTTCAAATTCCGATTTCAGCTTCTCTTTGTTTTTCCTTTTTTGGCACCTCGGAAAAACCTCCACGTGTTAGGTTATTCCGCCGATTCCACGGGTGGGGTGCTACCAAGACTCCTGCCTAAACTGAGGGTCGC
GCGAGGCGACTATAGCTTCTTAGCCGCCGAAGCTATCGTTGCCGGTAAGTGCGCTCCTTGAATAACCCCCTCCCCCCCACGCTATTCTTCAAATTCCGATTTCAGCTTCTCTTTGTTTTTCCTTTTTTGGCACCTCGGAAAAACCTCCACGTGTTAGGTTATTCCGCCGATTCCACGGGTGGGGTGCTACCAAGACTCCTGCCTAAACTGAGGGTCGC
GCGAGGCGACTATAGCTTCTTAGCCGCCGAAGCTATCGTTGCCGGTATTAGCGCTCCTTGAATAACCCCCTCCCCCCCACGCTATTCTTCAAATTCCGATTTCAGCTTCTCTTTGTTTTTCCTTTTTTGGCACCTCGGAAAAACCTCCACGTGTTAGGTTATTCCGCCGATTCCACGGGTGGGGTGCTACCAAGACTCCTGCCTAAACTGAGGGTCGC
GCGAGGCGACTATAGCTTCTTAGCCGCCGAAGCTATCGTTGCCGGTAGCCGCGCTCCTTGAATAACCCCCTCCCCCCCACGCTATTCTTCAAATTCCGATTTCAGCTTCTCTTTGTTTTTCCTTTTTTGGCACCTCGGAAAAACCTCCACGTGTTAGGTTATTCCGCCGATTCCACGGGTGGGGTGCTACCAAGACTCCTGCCTAAACTGAGGGTCGC
GCGAGGCGACTATAGCTTCTTAGCCGCCGAAGCTATCGTTGCCGGTACTCCCGCTCCTTGAATAACCCCCTCCCCCCCACGCTATTCTTCAAATTCCGATTTCAGCTTCTCTTTGTTTTTCCTTTTTTGGCACCTCGGAAAAACCTCCACGTGTTAGGTTATTCCGCCGATTCCACGGGTGGGGTGCTACCAAGACTCCTGCCTAAACTGAGGGTCGC
GCGAGGCGACTATAGCTTCTTAGCCGCCGAAGCTATCGTTGCCGGTACCTTCGCTCCTTGAATAACCCCCTCCCCCCCACGCTATTCTTCAAATTCCGATTTCAGCTTCTCTTTGTTTTTCCTTTTTTGGCACCTCGGAAAAACCTCCACGTGTTAGGTTATTCCGCCGATTCCACGGGTGGGGTGCTACCAAGACTCCTGCCTAAACTGAGGGTCGC
GCGAGGCGACTATAGCTTCTTAGCCGCCGAAGCTATCGTTGCCGGTACGAACGCTCCTTGAATAACCCCCTCCCCCCCACGCTATTCTTCAAATTCCGATTTCAGCTTCTCTTTGTTTTTCCTTTTTTGGCACCTCGGAAAAACCTCCACGTGTTAGGTTATTCCGCCGATTCCACGGGTGGGGTGCTACCAAGACTCCTGCCTAAACTGAGGGTCGC
GCGAGGCGACTATAGCTTCTTAGCCGCCGAAGCTATCGTTGCCGGTACACCTGCTCCTTGAATAACCCCCTCCCCCCCACGCTATTCTTCAAATTCCGATTTCAGCTTCTCTTTGTTTTTCCTTTTTTGGCACCTCGGAAAAACCTCCACGTGTTAGGTTATTCCGCCGATTCCACGGGTGGGGTGCTACCAAGACTCCTGCCTAAACTGAGGGTCGC
GCGAGGCGACTATAGCTTCTTAGCCGCCGAAGCTATCGTTGCCGGTACAATAGCTCCTTGAATAACCCCCTCCCCCCCACGCTATTCTTCAAATTCCGATTTCAGCTTCTCTTTGTTTTTCCTTTTTTGGCACCTCGGAAAAACCTCCACGTGTTAGGTTATTCCGCCGATTCCACGGGTGGGGTGCTACCAAGACTCCTGCCTAAACTGAGGGTCGC
GCGAGGCGACTATAGCTTCTTAGCCGCCGAAGCTATCGTTGCCGGTACATAGGCTCCTTGAATAACCCCCTCCCCCCCACGCTATTCTTCAAATTCCGATTTCAGCTTCTCTTTGTTTTTCCTTTTTTGGCACCTCGGAAAAACCTCCACGTGTTAGGTTATTCCGCCGATTCCACGGGTGGGGTGCTACCAAGACTCCTGCCTAAACTGAGGGTCGC
GCGAGGCGACTATAGCTTCTTAGCCGCCGAAGCTATCGTTGCCGGTACAGCAACTCCTTGAATAACCCCCTCCCCCCCACGCTATTCTTCAAATTCCGATTTCAGCTTCTCTTTGTTTTTCCTTTTTTGGCACCTCGGAAAAACCTCCACGTGTTAGGTTATTCCGCCGATTCCACGGGTGGGGTGCTACCAAGACTCCTGCCTAAACTGAGGGTCGC
GCGAGGCGACTATAGCTTCTTAGCCGCCGAAGCTATCGTTGCCGGTACAGAGCCTCCTTGAATAACCCCCTCCCCCCCACGCTATTCTTCAAATTCCGATTTCAGCTTCTCTTTGTTTTTCCTTTTTTGGCACCTCGGAAAAACCTCCACGTGTTAGGTTATTCCGCCGATTCCACGGGTGGGGTGCTACCAAGACTCCTGCCTAAACTGAGGGTCGC
GCGAGGCGACTATAGCTTCTTAGCCGCCGAAGCTATCGTTGCCGGTACAGTTTCTCCTTGAATAACCCCCTCCCCCCCACGCTATTCTTCAAATTCCGATTTCAGCTTCTCTTTGTTTTTCCTTTTTTGGCACCTCGGAAAAACCTCCACGTGTTAGGTTATTCCGCCGATTCCACGGGTGGGGTGCTACCAAGACTCCTGCCTAAACTGAGGGTCGC
GCGAGGCGACTATAGCTTCTTAGCCGCCGAAGCTATCGTTGCCGGTACAGGGATTCCTTGAATAACCCCCTCCCCCCCACGCTATTCTTCAAATTCCGATTTCAGCTTCTCTTTGTTTTTCCTTTTTTGGCACCTCGGAAAAACCTCCACGTGTTAGGTTATTCCGCCGATTCCACGGGTGGGGTGCTACCAAGACTCCTGCCTAAACTGAGGGTCGC
GCGAGGCGACTATAGCTTCTTAGCCGCCGAAGCTATCGTTGCCGGTACAGGTTATCCTTGAATAACCCCCTCCCCCCCACGCTATTCTTCAAATTCCGATTTCAGCTTCTCTTTGTTTTTCCTTTTTTGGCACCTCGGAAAAACCTCCACGTGTTAGGTTATTCCGCCGATTCCACGGGTGGGGTGCTACCAAGACTCCTGCCTAAACTGAGGGTCGC
GCGAGGCGACTATAGCTTCTTAGCCGCCGAAGCTATCGTTGCCGGTACAGGACGTCCTTGAATAACCCCCTCCCCCCCACGCTATTCTTCAAATTCCGATTTCAGCTTCTCTTTGTTTTTCCTTTTTTGGCACCTCGGAAAAACCTCCACGTGTTAGGTTATTCCGCCGATTCCACGGGTGGGGTGCTACCAAGACTCCTGCCTAAACTGAGGGTCGC
GCGAGGCGACTATAGCTTCTTAGCCGCCGAAGCTATCGTTGCCGGTACAGGCCGGCCTTGAATAACCCCCTCCCCCCCACGCTATTCTTCAAATTCCGATTTCAGCTTCTCTTTGTTTTTCCTTTTTTGGCACCTCGGAAAAACCTCCACGTGTTAGGTTATTCCGCCGATTCCACGGGTGGGGTGCTACCAAGACTCCTGCCTAAACTGAGGGTCGC
GCGAGGCGACTATAGCTTCTTAGCCGCCGAAGCTATCGTTGCCGGTACAGGCTACCCTTGAATAACCCCCTCCCCCCCACGCTATTCTTCAAATTCCGATTTCAGCTTCTCTTTGTTTTTCCTTTTTTGGCACCTCGGAAAAACCTCCACGTGTTAGGTTATTCCGCCGATTCCACGGGTGGGGTGCTACCAAGACTCCTGCCTAAACTGAGGGTCGC
GCGAGGCGACTATAGCTTCTTAGCCGCCGAAGCTATCGTTGCCGGTACAGGCATACCTTGAATAACCCCCTCCCCCCCACGCTATTCTTCAAATTCCGATTTCAGCTTCTCTTTGTTTTTCCTTTTTTGGCACCTCGGAAAAACCTCCACGTGTTAGGTTATTCCGCCGATTCCACGGGTGGGGTGCTACCAAGACTCCTGCCTAAACTGAGGGTCGC
GCGAGGCGACTATAGCTTCTTAGCCGCCGAAGCTATCGTTGCCGGTACAGGCGACTCTTGAATAACCCCCTCCCCCCCACGCTATTCTTCAAATTCCGATTTCAGCTTCTCTTTGTTTTTCCTTTTTTGGCACCTCGGAAAAACCTCCACGTGTTAGGTTATTCCGCCGATTCCACGGGTGGGGTGCTACCAAGACTCCTGCCTAAACTGAGGGTCGC
GCGAGGCGACTATAGCTTCTTAGCCGCCGAAGCTATCGTTGCCGGTACAGGCGGGGCTTGAATAACCCCCTCCCCCCCACGCTATTCTTCAAATTCCGATTTCAGCTTCTCTTTGTTTTTCCTTTTTTGGCACCTCGGAAAAACCTCCACGTGTTAGGTTATTCCGCCGATTCCACGGGTGGGGTGCTACCAAGACTCCTGCCTAAACTGAGGGTCGC
GCGAGGCGACTATAGCTTCTTAGCCGCCGAAGCTATCGTTGCCGGTACAGGCGTAACTTGAATAACCCCCTCCCCCCCACGCTATTCTTCAAATTCCGATTTCAGCTTCTCTTTGTTTTTCCTTTTTTGGCACCTCGGAAAAACCTCCACGTGTTAGGTTATTCCGCCGATTCCACGGGTGGGGTGCTACCAAGACTCCTGCCTAAACTGAGGGTCGC
GCGAGGCGACTATAGCTTCTTAGCCGCCGAAGCTATCGTTGCCGGTACAGGCGCAGGTTGAATAACCCCCTCCCCCCCACGCTATTCTTCAAATTCCGATTTCAGCTTCTCTTTGTTTTTCCTTTTTTGGCACCTCGGAAAAACCTCCACGTGTTAGGTTATTCCGCCGATTCCACGGGTGGGGTGCTACCAAGACTCCTGCCTAAACTGAGGGTCGC
GCGAGGCGACTATAGCTTCTTAGCCGCCGAAGCTATCGTTGCCGGTACAGGCGCCTTTTGAATAACCCCCTCCCCCCCACGCTATTCTTCAAATTCCGATTTCAGCTTCTCTTTGTTTTTCCTTTTTTGGCACCTCGGAAAAACCTCCACGTGTTAGGTTATTCCGCCGATTCCACGGGTGGGGTGCTACCAAGACTCCTGCCTAAACTGAGGGTCGC
GCGAGGCGACTATAGCTTCTTAGCCGCCGAAGCTATCGTTGCCGGTACAGGCGCGAATTGAATAACCCCCTCCCCCCCACGCTATTCTTCAAATTCCGATTTCAGCTTCTCTTTGTTTTTCCTTTTTTGGCACCTCGGAAAAACCTCCACGTGTTAGGTTATTCCGCCGATTCCACGGGTGGGGTGCTACCAAGACTCCTGCCTAAACTGAGGGTCGC
GCGAGGCGACTATAGCTTCTTAGCCGCCGAAGCTATCGTTGCCGGTACAGGCGCTGAATGAATAACCCCCTCCCCCCCACGCTATTCTTCAAATTCCGATTTCAGCTTCTCTTTGTTTTTCCTTTTTTGGCACCTCGGAAAAACCTCCACGTGTTAGGTTATTCCGCCGATTCCACGGGTGGGGTGCTACCAAGACTCCTGCCTAAACTGAGGGTCGC
GCGAGGCGACTATAGCTTCTTAGCCGCCGAAGCTATCGTTGCCGGTACAGGCGCTTGCTGAATAACCCCCTCCCCCCCACGCTATTCTTCAAATTCCGATTTCAGCTTCTCTTTGTTTTTCCTTTTTTGGCACCTCGGAAAAACCTCCACGTGTTAGGTTATTCCGCCGATTCCACGGGTGGGGTGCTACCAAGACTCCTGCCTAAACTGAGGGTCGC
GCGAGGCGACTATAGCTTCTTAGCCGCCGAAGCTATCGTTGCCGGTACAGGCGCTATGTGAATAACCCCCTCCCCCCCACGCTATTCTTCAAATTCCGATTTCAGCTTCTCTTTGTTTTTCCTTTTTTGGCACCTCGGAAAAACCTCCACGTGTTAGGTTATTCCGCCGATTCCACGGGTGGGGTGCTACCAAGACTCCTGCCTAAACTGAGGGTCGC
GCGAGGCGACTATAGCTTCTTAGCCGCCGAAGCTATCGTTGCCGGTACAGGCGCTCAACGAATAACCCCCTCCCCCCCACGCTATTCTTCAAATTCCGATTTCAGCTTCTCTTTGTTTTTCCTTTTTTGGCACCTCGGAAAAACCTCCACGTGTTAGGTTATTCCGCCGATTCCACGGGTGGGGTGCTACCAAGACTCCTGCCTAAACTGAGGGTCGC
GCGAGGCGACTATAGCTTCTTAGCCGCCGAAGCTATCGTTGCCGGTACAGGCGCTCTGAGAATAACCCCCTCCCCCCCACGCTATTCTTCAAATTCCGATTTCAGCTTCTCTTTGTTTTTCCTTTTTTGGCACCTCGGAAAAACCTCCACGTGTTAGGTTATTCCGCCGATTCCACGGGTGGGGTGCTACCAAGACTCCTGCCTAAACTGAGGGTCGC
GCGAGGCGACTATAGCTTCTTAGCCGCCGAAGCTATCGTTGCCGGTACAGGCGCTCGCGGAATAACCCCCTCCCCCCCACGCTATTCTTCAAATTCCGATTTCAGCTTCTCTTTGTTTTTCCTTTTTTGGCACCTCGGAAAAACCTCCACGTGTTAGGTTATTCCGCCGATTCCACGGGTGGGGTGCTACCAAGACTCCTGCCTAAACTGAGGGTCGC
GCGAGGCGACTATAGCTTCTTAGCCGCCGAAGCTATCGTTGCCGGTACAGGCGCTCCAACAATAACCCCCTCCCCCCCACGCTATTCTTCAAATTCCGATTTCAGCTTCTCTTTGTTTTTCCTTTTTTGGCACCTCGGAAAAACCTCCACGTGTTAGGTTATTCCGCCGATTCCACGGGTGGGGTGCTACCAAGACTCCTGCCTAAACTGAGGGTCGC
GCGAGGCGACTATAGCTTCTTAGCCGCCGAAGCTATCGTTGCCGGTACAGGCGCTCCGCTAATAACCCCCTCCCCCCCACGCTATTCTTCAAATTCCGATTTCAGCTTCTCTTTGTTTTTCCTTTTTTGGCACCTCGGAAAAACCTCCACGTGTTAGGTTATTCCGCCGATTCCACGGGTGGGGTGCTACCAAGACTCCTGCCTAAACTGAGGGTCGC
GCGAGGCGACTATAGCTTCTTAGCCGCCGAAGCTATCGTTGCCGGTACAGGCGCTCCCGAAATAACCCCCTCCCCCCCACGCTATTCTTCAAATTCCGATTTCAGCTTCTCTTTGTTTTTCCTTTTTTGGCACCTCGGAAAAACCTCCACGTGTTAGGTTATTCCGCCGATTCCACGGGTGGGGTGCTACCAAGACTCCTGCCTAAACTGAGGGTCGC
GCGAGGCGACTATAGCTTCTTAGCCGCCGAAGCTATCGTTGCCGGTACAGGCGCTCCTAAGATAACCCCCTCCCCCCCACGCTATTCTTCAAATTCCGATTTCAGCTTCTCTTTGTTTTTCCTTTTTTGGCACCTCGGAAAAACCTCCACGTGTTAGGTTATTCCGCCGATTCCACGGGTGGGGTGCTACCAAGACTCCTGCCTAAACTGAGGGTCGC
GCGAGGCGACTATAGCTTCTTAGCCGCCGAAGCTATCGTTGCCGGTACAGGCGCTCCTGTTATAACCCCCTCCCCCCCACGCTATTCTTCAAATTCCGATTTCAGCTTCTCTTTGTTTTTCCTTTTTTGGCACCTCGGAAAAACCTCCACGTGTTAGGTTATTCCGCCGATTCCACGGGTGGGGTGCTACCAAGACTCCTGCCTAAACTGAGGGTCGC
GCGAGGCGACTATAGCTTCTTAGCCGCCGAAGCTATCGTTGCCGGTACAGGCGCTCCTCCCATAACCCCCTCCCCCCCACGCTATTCTTCAAATTCCGATTTCAGCTTCTCTTTGTTTTTCCTTTTTTGGCACCTCGGAAAAACCTCCACGTGTTAGGTTATTCCGCCGATTCCACGGGTGGGGTGCTACCAAGACTCCTGCCTAAACTGAGGGTCGC
GCGAGGCGACTATAGCTTCTTAGCCGCCGAAGCTATCGTTGCCGGTACAGGCGCTCCTTCCTTAACCCCCTCCCCCCCACGCTATTCTTCAAATTCCGATTTCAGCTTCTCTTTGTTTTTCCTTTTTTGGCACCTCGGAAAAACCTCCACGTGTTAGGTTATTCCGCCGATTCCACGGGTGGGGTGCTACCAAGACTCCTGCCTAAACTGAGGGTCGC
GCGAGGCGACTATAGCTTCTTAGCCGCCGAAGCTATCGTTGCCGGTACAGGCGCTCCTTTTCTAACCCCCTCCCCCCCACGCTATTCTTCAAATTCCGATTTCAGCTTCTCTTTGTTTTTCCTTTTTTGGCACCTCGGAAAAACCTCCACGTGTTAGGTTATTCCGCCGATTCCACGGGTGGGGTGCTACCAAGACTCCTGCCTAAACTGAGGGTCGC
GCGAGGCGACTATAGCTTCTTAGCCGCCGAAGCTATCGTTGCCGGTACAGGCGCTCCTTAGGTAACCCCCTCCCCCCCACGCTATTCTTCAAATTCCGATTTCAGCTTCTCTTTGTTTTTCCTTTTTTGGCACCTCGGAAAAACCTCCACGTGTTAGGTTATTCCGCCGATTCCACGGGTGGGGTGCTACCAAGACTCCTGCCTAAACTGAGGGTCGC
GCGAGGCGACTATAGCTTCTTAGCCGCCGAAGCTATCGTTGCCGGTACAGGCGCTCCTTGGCAAACCCCCTCCCCCCCACGCTATTCTTCAAATTCCGATTTCAGCTTCTCTTTGTTTTTCCTTTTTTGGCACCTCGGAAAAACCTCCACGTGTTAGGTTATTCCGCCGATTCCACGGGTGGGGTGCTACCAAGACTCCTGCCTAAACTGAGGGTCGC
GCGAGGCGACTATAGCTTCTTAGCCGCCGAAGCTATCGTTGCCGGTACAGGCGCTCCTTGCTCAACCCCCTCCCCCCCACGCTATTCTTCAAATTCCGATTTCAGCTTCTCTTTGTTTTTCCTTTTTTGGCACCTCGGAAAAACCTCCACGTGTTAGGTTATTCCGCCGATTCCACGGGTGGGGTGCTACCAAGACTCCTGCCTAAACTGAGGGTCGC
GCGAGGCGACTATAGCTTCTTAGCCGCCGAAGCTATCGTTGCCGGTACAGGCGCTCCTTGTGGAACCCCCTCCCCCCCACGCTATTCTTCAAATTCCGATTTCAGCTTCTCTTTGTTTTTCCTTTTTTGGCACCTCGGAAAAACCTCCACGTGTTAGGTTATTCCGCCGATTCCACGGGTGGGGTGCTACCAAGACTCCTGCCTAAACTGAGGGTCGC
GCGAGGCGACTATAGCTTCTTAGCCGCCGAAGCTATCGTTGCCGGTACAGGCGCTCCTTGACAGACCCCCTCCCCCCCACGCTATTCTTCAAATTCCGATTTCAGCTTCTCTTTGTTTTTCCTTTTTTGGCACCTCGGAAAAACCTCCACGTGTTAGGTTATTCCGCCGATTCCACGGGTGGGGTGCTACCAAGACTCCTGCCTAAACTGAGGGTCGC
GCGAGGCGACTATAGCTTCTTAGCCGCCGAAGCTATCGTTGCCGGTACAGGCGCTCCTTGATGTACCCCCTCCCCCCCACGCTATTCTTCAAATTCCGATTTCAGCTTCTCTTTGTTTTTCCTTTTTTGGCACCTCGGAAAAACCTCCACGTGTTAGGTTATTCCGCCGATTCCACGGGTGGGGTGCTACCAAGACTCCTGCCTAAACTGAGGGTCGC
GCGAGGCGACTATAGCTTCTTAGCCGCCGAAGCTATCGTTGCCGGTACAGGCGCTCCTTGAGCCACCCCCTCCCCCCCACGCTATTCTTCAAATTCCGATTTCAGCTTCTCTTTGTTTTTCCTTTTTTGGCACCTCGGAAAAACCTCCACGTGTTAGGTTATTCCGCCGATTCCACGGGTGGGGTGCTACCAAGACTCCTGCCTAAACTGAGGGTCGC
GCGAGGCGACTATAGCTTCTTAGCCGCCGAAGCTATCGTTGCCGGTACAGGCGCTCCTTGAAGCTCCCCCTCCCCCCCACGCTATTCTTCAAATTCCGATTTCAGCTTCTCTTTGTTTTTCCTTTTTTGGCACCTCGGAAAAACCTCCACGTGTTAGGTTATTCCGCCGATTCCACGGGTGGGGTGCTACCAAGACTCCTGCCTAAACTGAGGGTCGC
GCGAGGCGACTATAGCTTCTTAGCCGCCGAAGCTATCGTTGCCGGTACAGGCGCTCCTTGAAAGGCCCCCTCCCCCCCACGCTATTCTTCAAATTCCGATTTCAGCTTCTCTTTGTTTTTCCTTTTTTGGCACCTCGGAAAAACCTCCACGTGTTAGGTTATTCCGCCGATTCCACGGGTGGGGTGCTACCAAGACTCCTGCCTAAACTGAGGGTCGC
GCGAGGCGACTATAGCTTCTTAGCCGCCGAAGCTATCGTTGCCGGTACAGGCGCTCCTTGAACTCCCCCCTCCCCCCCACGCTATTCTTCAAATTCCGATTTCAGCTTCTCTTTGTTTTTCCTTTTTTGGCACCTCGGAAAAACCTCCACGTGTTAGGTTATTCCGCCGATTCCACGGGTGGGGTGCTACCAAGACTCCTGCCTAAACTGAGGGTCGC
GCGAGGCGACTATAGCTTCTTAGCCGCCGAAGCTATCGTTGCCGGTACAGGCGCTCCTTGAATTTACCCCTCCCCCCCACGCTATTCTTCAAATTCCGATTTCAGCTTCTCTTTGTTTTTCCTTTTTTGGCACCTCGGAAAAACCTCCACGTGTTAGGTTATTCCGCCGATTCCACGGGTGGGGTGCTACCAAGACTCCTGCCTAAACTGAGGGTCGC
GCGAGGCGACTATAGCTTCTTAGCCGCCGAAGCTATCGTTGCCGGTACAGGCGCTCCTTGAATCGTCCCCTCCCCCCCACGCTATTCTTCAAATTCCGATTTCAGCTTCTCTTTGTTTTTCCTTTTTTGGCACCTCGGAAAAACCTCCACGTGTTAGGTTATTCCGCCGATTCCACGGGTGGGGTGCTACCAAGACTCCTGCCTAAACTGAGGGTCGC
GCGAGGCGACTATAGCTTCTTAGCCGCCGAAGCTATCGTTGCCGGTACAGGCGCTCCTTGAATGCGCCCCTCCCCCCCACGCTATTCTTCAAATTCCGATTTCAGCTTCTCTTTGTTTTTCCTTTTTTGGCACCTCGGAAAAACCTCCACGTGTTAGGTTATTCCGCCGATTCCACGGGTGGGGTGCTACCAAGACTCCTGCCTAAACTGAGGGTCGC
GCGAGGCGACTATAGCTTCTTAGCCGCCGAAGCTATCGTTGCCGGTACAGGCGCTCCTTGAATATAGCCCTCCCCCCCACGCTATTCTTCAAATTCCGATTTCAGCTTCTCTTTGTTTTTCCTTTTTTGGCACCTCGGAAAAACCTCCACGTGTTAGGTTATTCCGCCGATTCCACGGGTGGGGTGCTACCAAGACTCCTGCCTAAACTGAGGGTCGC
GCGAGGCGACTATAGCTTCTTAGCCGCCGAAGCTATCGTTGCCGGTACAGGCGCTCCTTGAATAGTTCCCTCCCCCCCACGCTATTCTTCAAATTCCGATTTCAGCTTCTCTTTGTTTTTCCTTTTTTGGCACCTCGGAAAAACCTCCACGTGTTAGGTTATTCCGCCGATTCCACGGGTGGGGTGCTACCAAGACTCCTGCCTAAACTGAGGGTCGC
GCGAGGCGACTATAGCTTCTTAGCCGCCGAAGCTATCGTTGCCGGTACAGGCGCTCCTTGAATACGACCCTCCCCCCCACGCTATTCTTCAAATTCCGATTTCAGCTTCTCTTTGTTTTTCCTTTTTTGGCACCTCGGAAAAACCTCCACGTGTTAGGTTATTCCGCCGATTCCACGGGTGGGGTGCTACCAAGACTCCTGCCTAAACTGAGGGTCGC
GCGAGGCGACTATAGCTTCTTAGCCGCCGAAGCTATCGTTGCCGGTACAGGCGCTCCTTGAATAATAGCCTCCCCCCCACGCTATTCTTCAAATTCCGATTTCAGCTTCTCTTTGTTTTTCCTTTTTTGGCACCTCGGAAAAACCTCCACGTGTTAGGTTATTCCGCCGATTCCACGGGTGGGGTGCTACCAAGACTCCTGCCTAAACTGAGGGTCGC
GCGAGGCGACTATAGCTTCTTAGCCGCCGAAGCTATCGTTGCCGGTACAGGCGCTCCTTGAATAAATACCTCCCCCCCACGCTATTCTTCAAATTCCGATTTCAGCTTCTCTTTGTTTTTCCTTTTTTGGCACCTCGGAAAAACCTCCACGTGTTAGGTTATTCCGCCGATTCCACGGGTGGGGTGCTACCAAGACTCCTGCCTAAACTGAGGGTCGC
GCGAGGCGACTATAGCTTCTTAGCCGCCGAAGCTATCGTTGCCGGTACAGGCGCTCCTTGAATAAGGTCCTCCCCCCCACGCTATTCTTCAAATTCCGATTTCAGCTTCTCTTTGTTTTTCCTTTTTTGGCACCTCGGAAAAACCTCCACGTGTTAGGTTATTCCGCCGATTCCACGGGTGGGGTGCTACCAAGACTCCTGCCTAAACTGAGGGTCGC
GCGAGGCGACTATAGCTTCTTAGCCGCCGAAGCTATCGTTGCCGGTACAGGCGCTCCTTGAATAACAAGCTCCCCCCCACGCTATTCTTCAAATTCCGATTTCAGCTTCTCTTTGTTTTTCCTTTTTTGGCACCTCGGAAAAACCTCCACGTGTTAGGTTATTCCGCCGATTCCACGGGTGGGGTGCTACCAAGACTCCTGCCTAAACTGAGGGTCGC
GCGAGGCGACTATAGCTTCTTAGCCGCCGAAGCTATCGTTGCCGGTACAGGCGCTCCTTGAATAACTTACTCCCCCCCACGCTATTCTTCAAATTCCGATTTCAGCTTCTCTTTGTTTTTCCTTTTTTGGCACCTCGGAAAAACCTCCACGTGTTAGGTTATTCCGCCGATTCCACGGGTGGGGTGCTACCAAGACTCCTGCCTAAACTGAGGGTCGC
GCGAGGCGACTATAGCTTCTTAGCCGCCGAAGCTATCGTTGCCGGTACAGGCGCTCCTTGAATAACGGTCTCCCCCCCACGCTATTCTTCAAATTCCGATTTCAGCTTCTCTTTGTTTTTCCTTTTTTGGCACCTCGGAAAAACCTCCACGTGTTAGGTTATTCCGCCGATTCCACGGGTGGGGTGCTACCAAGACTCCTGCCTAAACTGAGGGTCGC
GCGAGGCGACTATAGCTTCTTAGCCGCCGAAGCTATCGTTGCCGGTACAGGCGCTCCTTGAATAACCTGGTCCCCCCCACGCTATTCTTCAAATTCCGATTTCAGCTTCTCTTTGTTTTTCCTTTTTTGGCACCTCGGAAAAACCTCCACGTGTTAGGTTATTCCGCCGATTCCACGGGTGGGGTGCTACCAAGACTCCTGCCTAAACTGAGGGTCGC
GCGAGGCGACTATAGCTTCTTAGCCGCCGAAGCTATCGTTGCCGGTACAGGCGCTCCTTGAATAACCAATTCCCCCCCACGCTATTCTTCAAATTCCGATTTCAGCTTCTCTTTGTTTTTCCTTTTTTGGCACCTCGGAAAAACCTCCACGTGTTAGGTTATTCCGCCGATTCCACGGGTGGGGTGCTACCAAGACTCCTGCCTAAACTGAGGGTCGC
GCGAGGCGACTATAGCTTCTTAGCCGCCGAAGCTATCGTTGCCGGTACAGGCGCTCCTTGAATAACCGTATCCCCCCCACGCTATTCTTCAAATTCCGATTTCAGCTTCTCTTTGTTTTTCCTTTTTTGGCACCTCGGAAAAACCTCCACGTGTTAGGTTATTCCGCCGATTCCACGGGTGGGGTGCTACCAAGACTCCTGCCTAAACTGAGGGTCGC
GCGAGGCGACTATAGCTTCTTAGCCGCCGAAGCTATCGTTGCCGGTACAGGCGCTCCTTGAATAACCCGGCCCCCCCCACGCTATTCTTCAAATTCCGATTTCAGCTTCTCTTTGTTTTTCCTTTTTTGGCACCTCGGAAAAACCTCCACGTGTTAGGTTATTCCGCCGATTCCACGGGTGGGGTGCTACCAAGACTCCTGCCTAAACTGAGGGTCGC
GCGAGGCGACTATAGCTTCTTAGCCGCCGAAGCTATCGTTGCCGGTACAGGCGCTCCTTGAATAACCCTTACCCCCCCACGCTATTCTTCAAATTCCGATTTCAGCTTCTCTTTGTTTTTCCTTTTTTGGCACCTCGGAAAAACCTCCACGTGTTAGGTTATTCCGCCGATTCCACGGGTGGGGTGCTACCAAGACTCCTGCCTAAACTGAGGGTCGC
GCGAGGCGACTATAGCTTCTTAGCCGCCGAAGCTATCGTTGCCGGTACAGGCGCTCCTTGAATAACCCAAGCCCCCCCACGCTATTCTTCAAATTCCGATTTCAGCTTCTCTTTGTTTTTCCTTTTTTGGCACCTCGGAAAAACCTCCACGTGTTAGGTTATTCCGCCGATTCCACGGGTGGGGTGCTACCAAGACTCCTGCCTAAACTGAGGGTCGC
GCGAGGCGACTATAGCTTCTTAGCCGCCGAAGCTATCGTTGCCGGTACAGGCGCTCCTTGAATAACCCCGGACCCCCCACGCTATTCTTCAAATTCCGATTTCAGCTTCTCTTTGTTTTTCCTTTTTTGGCACCTCGGAAAAACCTCCACGTGTTAGGTTATTCCGCCGATTCCACGGGTGGGGTGCTACCAAGACTCCTGCCTAAACTGAGGGTCGC
GCGAGGCGACTATAGCTTCTTAGCCGCCGAAGCTATCGTTGCCGGTACAGGCGCTCCTTGAATAACCCCTATCCCCCCACGCTATTCTTCAAATTCCGATTTCAGCTTCTCTTTGTTTTTCCTTTTTTGGCACCTCGGAAAAACCTCCACGTGTTAGGTTATTCCGCCGATTCCACGGGTGGGGTGCTACCAAGACTCCTGCCTAAACTGAGGGTCGC
GCGAGGCGACTATAGCTTCTTAGCCGCCGAAGCTATCGTTGCCGGTACAGGCGCTCCTTGAATAACCCCACGCCCCCCACGCTATTCTTCAAATTCCGATTTCAGCTTCTCTTTGTTTTTCCTTTTTTGGCACCTCGGAAAAACCTCCACGTGTTAGGTTATTCCGCCGATTCCACGGGTGGGGTGCTACCAAGACTCCTGCCTAAACTGAGGGTCGC
GCGAGGCGACTATAGCTTCTTAGCCGCCGAAGCTATCGTTGCCGGTACAGGCGCTCCTTGAATAACCCCCAATCCCCCACGCTATTCTTCAAATTCCGATTTCAGCTTCTCTTTGTTTTTCCTTTTTTGGCACCTCGGAAAAACCTCCACGTGTTAGGTTATTCCGCCGATTCCACGGGTGGGGTGCTACCAAGACTCCTGCCTAAACTGAGGGTCGC
GCGAGGCGACTATAGCTTCTTAGCCGCCGAAGCTATCGTTGCCGGTACAGGCGCTCCTTGAATAACCCCCCTGCCCCCACGCTATTCTTCAAATTCCGATTTCAGCTTCTCTTTGTTTTTCCTTTTTTGGCACCTCGGAAAAACCTCCACGTGTTAGGTTATTCCGCCGATTCCACGGGTGGGGTGCTACCAAGACTCCTGCCTAAACTGAGGGTCGC
GCGAGGCGACTATAGCTTCTTAGCCGCCGAAGCTATCGTTGCCGGTACAGGCGCTCCTTGAATAACCCCCGGACCCCCACGCTATTCTTCAAATTCCGATTTCAGCTTCTCTTTGTTTTTCCTTTTTTGGCACCTCGGAAAAACCTCCACGTGTTAGGTTATTCCGCCGATTCCACGGGTGGGGTGCTACCAAGACTCCTGCCTAAACTGAGGGTCGC
GCGAGGCGACTATAGCTTCTTAGCCGCCGAAGCTATCGTTGCCGGTACAGGCGCTCCTTGAATAACCCCCTATTCCCCACGCTATTCTTCAAATTCCGATTTCAGCTTCTCTTTGTTTTTCCTTTTTTGGCACCTCGGAAAAACCTCCACGTGTTAGGTTATTCCGCCGATTCCACGGGTGGGGTGCTACCAAGACTCCTGCCTAAACTGAGGGTCGC
GCGAGGCGACTATAGCTTCTTAGCCGCCGAAGCTATCGTTGCCGGTACAGGCGCTCCTTGAATAACCCCCTGGACCCCACGCTATTCTTCAAATTCCGATTTCAGCTTCTCTTTGTTTTTCCTTTTTTGGCACCTCGGAAAAACCTCCACGTGTTAGGTTATTCCGCCGATTCCACGGGTGGGGTGCTACCAAGACTCCTGCCTAAACTGAGGGTCGC
GCGAGGCGACTATAGCTTCTTAGCCGCCGAAGCTATCGTTGCCGGTACAGGCGCTCCTTGAATAACCCCCTTAGCCCCACGCTATTCTTCAAATTCCGATTTCAGCTTCTCTTTGTTTTTCCTTTTTTGGCACCTCGGAAAAACCTCCACGTGTTAGGTTATTCCGCCGATTCCACGGGTGGGGTGCTACCAAGACTCCTGCCTAAACTGAGGGTCGC
GCGAGGCGACTATAGCTTCTTAGCCGCCGAAGCTATCGTTGCCGGTACAGGCGCTCCTTGAATAACCCCCTCGGACCCACGCTATTCTTCAAATTCCGATTTCAGCTTCTCTTTGTTTTTCCTTTTTTGGCACCTCGGAAAAACCTCCACGTGTTAGGTTATTCCGCCGATTCCACGGGTGGGGTGCTACCAAGACTCCTGCCTAAACTGAGGGTCGC
GCGAGGCGACTATAGCTTCTTAGCCGCCGAAGCTATCGTTGCCGGTACAGGCGCTCCTTGAATAACCCCCTCATGCCCACGCTATTCTTCAAATTCCGATTTCAGCTTCTCTTTGTTTTTCCTTTTTTGGCACCTCGGAAAAACCTCCACGTGTTAGGTTATTCCGCCGATTCCACGGGTGGGGTGCTACCAAGACTCCTGCCTAAACTGAGGGTCGC
GCGAGGCGACTATAGCTTCTTAGCCGCCGAAGCTATCGTTGCCGGTACAGGCGCTCCTTGAATAACCCCCTCTATCCCACGCTATTCTTCAAATTCCGATTTCAGCTTCTCTTTGTTTTTCCTTTTTTGGCACCTCGGAAAAACCTCCACGTGTTAGGTTATTCCGCCGATTCCACGGGTGGGGTGCTACCAAGACTCCTGCCTAAACTGAGGGTCGC
GCGAGGCGACTATAGCTTCTTAGCCGCCGAAGCTATCGTTGCCGGTACAGGCGCTCCTTGAATAACCCCCTCCTGACCACGCTATTCTTCAAATTCCGATTTCAGCTTCTCTTTGTTTTTCCTTTTTTGGCACCTCGGAAAAACCTCCACGTGTTAGGTTATTCCGCCGATTCCACGGGTGGGGTGCTACCAAGACTCCTGCCTAAACTGAGGGTCGC
GCGAGGCGACTATAGCTTCTTAGCCGCCGAAGCTATCGTTGCCGGTACAGGCGCTCCTTGAATAACCCCCTCCATTCCACGCTATTCTTCAAATTCCGATTTCAGCTTCTCTTTGTTTTTCCTTTTTTGGCACCTCGGAAAAACCTCCACGTGTTAGGTTATTCCGCCGATTCCACGGGTGGGGTGCTACCAAGACTCCTGCCTAAACTGAGGGTCGC
GCGAGGCGACTATAGCTTCTTAGCCGCCGAAGCTATCGTTGCCGGTACAGGCGCTCCTTGAATAACCCCCTCCGAGCCACGCTATTCTTCAAATTCCGATTTCAGCTTCTCTTTGTTTTTCCTTTTTTGGCACCTCGGAAAAACCTCCACGTGTTAGGTTATTCCGCCGATTCCACGGGTGGGGTGCTACCAAGACTCCTGCCTAAACTGAGGGTCGC
GCGAGGCGACTATAGCTTCTTAGCCGCCGAAGCTATCGTTGCCGGTACAGGCGCTCCTTGAATAACCCCCTCCCGGGCACGCTATTCTTCAAATTCCGATTTCAGCTTCTCTTTGTTTTTCCTTTTTTGGCACCTCGGAAAAACCTCCACGTGTTAGGTTATTCCGCCGATTCCACGGGTGGGGTGCTACCAAGACTCCTGCCTAAACTGAGGGTCGC
GCGAGGCGACTATAGCTTCTTAGCCGCCGAAGCTATCGTTGCCGGTACAGGCGCTCCTTGAATAACCCCCTCCCAATCACGCTATTCTTCAAATTCCGATTTCAGCTTCTCTTTGTTTTTCCTTTTTTGGCACCTCGGAAAAACCTCCACGTGTTAGGTTATTCCGCCGATTCCACGGGTGGGGTGCTACCAAGACTCCTGCCTAAACTGAGGGTCGC
GCGAGGCGACTATAGCTTCTTAGCCGCCGAAGCTATCGTTGCCGGTACAGGCGCTCCTTGAATAACCCCCTCCCTTACACGCTATTCTTCAAATTCCGATTTCAGCTTCTCTTTGTTTTTCCTTTTTTGGCACCTCGGAAAAACCTCCACGTGTTAGGTTATTCCGCCGATTCCACGGGTGGGGTGCTACCAAGACTCCTGCCTAAACTGAGGGTCGC
GCGAGGCGACTATAGCTTCTTAGCCGCCGAAGCTATCGTTGCCGGTACAGGCGCTCCTTGAATAACCCCCTCCCCATTACGCTATTCTTCAAATTCCGATTTCAGCTTCTCTTTGTTTTTCCTTTTTTGGCACCTCGGAAAAACCTCCACGTGTTAGGTTATTCCGCCGATTCCACGGGTGGGGTGCTACCAAGACTCCTGCCTAAACTGAGGGTCGC
GCGAGGCGACTATAGCTTCTTAGCCGCCGAAGCTATCGTTGCCGGTACAGGCGCTCCTTGAATAACCCCCTCCCCTGGACGCTATTCTTCAAATTCCGATTTCAGCTTCTCTTTGTTTTTCCTTTTTTGGCACCTCGGAAAAACCTCCACGTGTTAGGTTATTCCGCCGATTCCACGGGTGGGGTGCTACCAAGACTCCTGCCTAAACTGAGGGTCGC
GCGAGGCGACTATAGCTTCTTAGCCGCCGAAGCTATCGTTGCCGGTACAGGCGCTCCTTGAATAACCCCCTCCCCGAAACGCTATTCTTCAAATTCCGATTTCAGCTTCTCTTTGTTTTTCCTTTTTTGGCACCTCGGAAAAACCTCCACGTGTTAGGTTATTCCGCCGATTCCACGGGTGGGGTGCTACCAAGACTCCTGCCTAAACTGAGGGTCGC
GCGAGGCGACTATAGCTTCTTAGCCGCCGAAGCTATCGTTGCCGGTACAGGCGCTCCTTGAATAACCCCCTCCCCCAAGCGCTATTCTTCAAATTCCGATTTCAGCTTCTCTTTGTTTTTCCTTTTTTGGCACCTCGGAAAAACCTCCACGTGTTAGGTTATTCCGCCGATTCCACGGGTGGGGTGCTACCAAGACTCCTGCCTAAACTGAGGGTCGC
GCGAGGCGACTATAGCTTCTTAGCCGCCGAAGCTATCGTTGCCGGTACAGGCGCTCCTTGAATAACCCCCTCCCCCGGCCGCTATTCTTCAAATTCCGATTTCAGCTTCTCTTTGTTTTTCCTTTTTTGGCACCTCGGAAAAACCTCCACGTGTTAGGTTATTCCGCCGATTCCACGGGTGGGGTGCTACCAAGACTCCTGCCTAAACTGAGGGTCGC
GCGAGGCGACTATAGCTTCTTAGCCGCCGAAGCTATCGTTGCCGGTACAGGCGCTCCTTGAATAACCCCCTCCCCCTTTCGCTATTCTTCAAATTCCGATTTCAGCTTCTCTTTGTTTTTCCTTTTTTGGCACCTCGGAAAAACCTCCACGTGTTAGGTTATTCCGCCGATTCCACGGGTGGGGTGCTACCAAGACTCCTGCCTAAACTGAGGGTCGC
GCGAGGCGACTATAGCTTCTTAGCCGCCGAAGCTATCGTTGCCGGTACAGGCGCTCCTTGAATAACCCCCTCCCCCCTCGGCTATTCTTCAAATTCCGATTTCAGCTTCTCTTTGTTTTTCCTTTTTTGGCACCTCGGAAAAACCTCCACGTGTTAGGTTATTCCGCCGATTCCACGGGTGGGGTGCTACCAAGACTCCTGCCTAAACTGAGGGTCGC
GCGAGGCGACTATAGCTTCTTAGCCGCCGAAGCTATCGTTGCCGGTACAGGCGCTCCTTGAATAACCCCCTCCCCCCAGAGCTATTCTTCAAATTCCGATTTCAGCTTCTCTTTGTTTTTCCTTTTTTGGCACCTCGGAAAAACCTCCACGTGTTAGGTTATTCCGCCGATTCCACGGGTGGGGTGCTACCAAGACTCCTGCCTAAACTGAGGGTCGC
GCGAGGCGACTATAGCTTCTTAGCCGCCGAAGCTATCGTTGCCGGTACAGGCGCTCCTTGAATAACCCCCTCCCCCCGTTGCTATTCTTCAAATTCCGATTTCAGCTTCTCTTTGTTTTTCCTTTTTTGGCACCTCGGAAAAACCTCCACGTGTTAGGTTATTCCGCCGATTCCACGGGTGGGGTGCTACCAAGACTCCTGCCTAAACTGAGGGTCGC
GCGAGGCGACTATAGCTTCTTAGCCGCCGAAGCTATCGTTGCCGGTACAGGCGCTCCTTGAATAACCCCCTCCCCCCCTACCTATTCTTCAAATTCCGATTTCAGCTTCTCTTTGTTTTTCCTTTTTTGGCACCTCGGAAAAACCTCCACGTGTTAGGTTATTCCGCCGATTCCACGGGTGGGGTGCTACCAAGACTCCTGCCTAAACTGAGGGTCGC
GCGAGGCGACTATAGCTTCTTAGCCGCCGAAGCTATCGTTGCCGGTACAGGCGCTCCTTGAATAACCCCCTCCCCCCCCTACTATTCTTCAAATTCCGATTTCAGCTTCTCTTTGTTTTTCCTTTTTTGGCACCTCGGAAAAACCTCCACGTGTTAGGTTATTCCGCCGATTCCACGGGTGGGGTGCTACCAAGACTCCTGCCTAAACTGAGGGTCGC
GCGAGGCGACTATAGCTTCTTAGCCGCCGAAGCTATCGTTGCCGGTACAGGCGCTCCTTGAATAACCCCCTCCCCCCCGGTCTATTCTTCAAATTCCGATTTCAGCTTCTCTTTGTTTTTCCTTTTTTGGCACCTCGGAAAAACCTCCACGTGTTAGGTTATTCCGCCGATTCCACGGGTGGGGTGCTACCAAGACTCCTGCCTAAACTGAGGGTCGC
GCGAGGCGACTATAGCTTCTTAGCCGCCGAAGCTATCGTTGCCGGTACAGGCGCTCCTTGAATAACCCCCTCCCCCCCAATGTATTCTTCAAATTCCGATTTCAGCTTCTCTTTGTTTTTCCTTTTTTGGCACCTCGGAAAAACCTCCACGTGTTAGGTTATTCCGCCGATTCCACGGGTGGGGTGCTACCAAGACTCCTGCCTAAACTGAGGGTCGC
GCGAGGCGACTATAGCTTCTTAGCCGCCGAAGCTATCGTTGCCGGTACAGGCGCTCCTTGAATAACCCCCTCCCCCCCAGATTATTCTTCAAATTCCGATTTCAGCTTCTCTTTGTTTTTCCTTTTTTGGCACCTCGGAAAAACCTCCACGTGTTAGGTTATTCCGCCGATTCCACGGGTGGGGTGCTACCAAGACTCCTGCCTAAACTGAGGGTCGC
GCGAGGCGACTATAGCTTCTTAGCCGCCGAAGCTATCGTTGCCGGTACAGGCGCTCCTTGAATAACCCCCTCCCCCCCATCATATTCTTCAAATTCCGATTTCAGCTTCTCTTTGTTTTTCCTTTTTTGGCACCTCGGAAAAACCTCCACGTGTTAGGTTATTCCGCCGATTCCACGGGTGGGGTGCTACCAAGACTCCTGCCTAAACTGAGGGTCGC
GCGAGGCGACTATAGCTTCTTAGCCGCCGAAGCTATCGTTGCCGGTACAGGCGCTCCTTGAATAACCCCCTCCCCCCCACCTAATTCTTCAAATTCCGATTTCAGCTTCTCTTTGTTTTTCCTTTTTTGGCACCTCGGAAAAACCTCCACGTGTTAGGTTATTCCGCCGATTCCACGGGTGGGGTGCTACCAAGACTCCTGCCTAAACTGAGGGTCGC
GCGAGGCGACTATAGCTTCTTAGCCGCCGAAGCTATCGTTGCCGGTACAGGCGCTCCTTGAATAACCCCCTCCCCCCCACTGGATTCTTCAAATTCCGATTTCAGCTTCTCTTTGTTTTTCCTTTTTTGGCACCTCGGAAAAACCTCCACGTGTTAGGTTATTCCGCCGATTCCACGGGTGGGGTGCTACCAAGACTCCTGCCTAAACTGAGGGTCGC
GCGAGGCGACTATAGCTTCTTAGCCGCCGAAGCTATCGTTGCCGGTACAGGCGCTCCTTGAATAACCCCCTCCCCCCCACAACATTCTTCAAATTCCGATTTCAGCTTCTCTTTGTTTTTCCTTTTTTGGCACCTCGGAAAAACCTCCACGTGTTAGGTTATTCCGCCGATTCCACGGGTGGGGTGCTACCAAGACTCCTGCCTAAACTGAGGGTCGC
GCGAGGCGACTATAGCTTCTTAGCCGCCGAAGCTATCGTTGCCGGTACAGGCGCTCCTTGAATAACCCCCTCCCCCCCACGGCTTTCTTCAAATTCCGATTTCAGCTTCTCTTTGTTTTTCCTTTTTTGGCACCTCGGAAAAACCTCCACGTGTTAGGTTATTCCGCCGATTCCACGGGTGGGGTGCTACCAAGACTCCTGCCTAAACTGAGGGTCGC
GCGAGGCGACTATAGCTTCTTAGCCGCCGAAGCTATCGTTGCCGGTACAGGCGCTCCTTGAATAACCCCCTCCCCCCCACGAGGTTCTTCAAATTCCGATTTCAGCTTCTCTTTGTTTTTCCTTTTTTGGCACCTCGGAAAAACCTCCACGTGTTAGGTTATTCCGCCGATTCCACGGGTGGGGTGCTACCAAGACTCCTGCCTAAACTGAGGGTCGC
GCGAGGCGACTATAGCTTCTTAGCCGCCGAAGCTATCGTTGCCGGTACAGGCGCTCCTTGAATAACCCCCTCCCCCCCACGTACTTCTTCAAATTCCGATTTCAGCTTCTCTTTGTTTTTCCTTTTTTGGCACCTCGGAAAAACCTCCACGTGTTAGGTTATTCCGCCGATTCCACGGGTGGGGTGCTACCAAGACTCCTGCCTAAACTGAGGGTCGC
GCGAGGCGACTATAGCTTCTTAGCCGCCGAAGCTATCGTTGCCGGTACAGGCGCTCCTTGAATAACCCCCTCCCCCCCACGCACCTCTTCAAATTCCGATTTCAGCTTCTCTTTGTTTTTCCTTTTTTGGCACCTCGGAAAAACCTCCACGTGTTAGGTTATTCCGCCGATTCCACGGGTGGGGTGCTACCAAGACTCCTGCCTAAACTGAGGGTCGC
GCGAGGCGACTATAGCTTCTTAGCCGCCGAAGCTATCGTTGCCGGTACAGGCGCTCCTTGAATAACCCCCTCCCCCCCACGCCGGTCTTCAAATTCCGATTTCAGCTTCTCTTTGTTTTTCCTTTTTTGGCACCTCGGAAAAACCTCCACGTGTTAGGTTATTCCGCCGATTCCACGGGTGGGGTGCTACCAAGACTCCTGCCTAAACTGAGGGTCGC
GCGAGGCGACTATAGCTTCTTAGCCGCCGAAGCTATCGTTGCCGGTACAGGCGCTCCTTGAATAACCCCCTCCCCCCCACGCGTATCTTCAAATTCCGATTTCAGCTTCTCTTTGTTTTTCCTTTTTTGGCACCTCGGAAAAACCTCCACGTGTTAGGTTATTCCGCCGATTCCACGGGTGGGGTGCTACCAAGACTCCTGCCTAAACTGAGGGTCGC
GCGAGGCGACTATAGCTTCTTAGCCGCCGAAGCTATCGTTGCCGGTACAGGCGCTCCTTGAATAACCCCCTCCCCCCCACGCTTGACTTCAAATTCCGATTTCAGCTTCTCTTTGTTTTTCCTTTTTTGGCACCTCGGAAAAACCTCCACGTGTTAGGTTATTCCGCCGATTCCACGGGTGGGGTGCTACCAAGACTCCTGCCTAAACTGAGGGTCGC
GCGAGGCGACTATAGCTTCTTAGCCGCCGAAGCTATCGTTGCCGGTACAGGCGCTCCTTGAATAACCCCCTCCCCCCCACGCTCCGCTTCAAATTCCGATTTCAGCTTCTCTTTGTTTTTCCTTTTTTGGCACCTCGGAAAAACCTCCACGTGTTAGGTTATTCCGCCGATTCCACGGGTGGGGTGCTACCAAGACTCCTGCCTAAACTGAGGGTCGC
GCGAGGCGACTATAGCTTCTTAGCCGCCGAAGCTATCGTTGCCGGTACAGGCGCTCCTTGAATAACCCCCTCCCCCCCACGCTGACCTTCAAATTCCGATTTCAGCTTCTCTTTGTTTTTCCTTTTTTGGCACCTCGGAAAAACCTCCACGTGTTAGGTTATTCCGCCGATTCCACGGGTGGGGTGCTACCAAGACTCCTGCCTAAACTGAGGGTCGC
GCGAGGCGACTATAGCTTCTTAGCCGCCGAAGCTATCGTTGCCGGTACAGGCGCTCCTTGAATAACCCCCTCCCCCCCACGCTAACGTTCAAATTCCGATTTCAGCTTCTCTTTGTTTTTCCTTTTTTGGCACCTCGGAAAAACCTCCACGTGTTAGGTTATTCCGCCGATTCCACGGGTGGGGTGCTACCAAGACTCCTGCCTAAACTGAGGGTCGC
GCGAGGCGACTATAGCTTCTTAGCCGCCGAAGCTATCGTTGCCGGTACAGGCGCTCCTTGAATAACCCCCTCCCCCCCACGCTACGTTTCAAATTCCGATTTCAGCTTCTCTTTGTTTTTCCTTTTTTGGCACCTCGGAAAAACCTCCACGTGTTAGGTTATTCCGCCGATTCCACGGGTGGGGTGCTACCAAGACTCCTGCCTAAACTGAGGGTCGC
GCGAGGCGACTATAGCTTCTTAGCCGCCGAAGCTATCGTTGCCGGTACAGGCGCTCCTTGAATAACCCCCTCCCCCCCACGCTAGAATTCAAATTCCGATTTCAGCTTCTCTTTGTTTTTCCTTTTTTGGCACCTCGGAAAAACCTCCACGTGTTAGGTTATTCCGCCGATTCCACGGGTGGGGTGCTACCAAGACTCCTGCCTAAACTGAGGGTCGC
GCGAGGCGACTATAGCTTCTTAGCCGCCGAAGCTATCGTTGCCGGTACAGGCGCTCCTTGAATAACCCCCTCCCCCCCACGCTATGGGTCAAATTCCGATTTCAGCTTCTCTTTGTTTTTCCTTTTTTGGCACCTCGGAAAAACCTCCACGTGTTAGGTTATTCCGCCGATTCCACGGGTGGGGTGCTACCAAGACTCCTGCCTAAACTGAGGGTCGC
GCGAGGCGACTATAGCTTCTTAGCCGCCGAAGCTATCGTTGCCGGTACAGGCGCTCCTTGAATAACCCCCTCCCCCCCACGCTATCACTCAAATTCCGATTTCAGCTTCTCTTTGTTTTTCCTTTTTTGGCACCTCGGAAAAACCTCCACGTGTTAGGTTATTCCGCCGATTCCACGGGTGGGGTGCTACCAAGACTCCTGCCTAAACTGAGGGTCGC
GCGAGGCGACTATAGCTTCTTAGCCGCCGAAGCTATCGTTGCCGGTACAGGCGCTCCTTGAATAACCCCCTCCCCCCCACGCTATATATCAAATTCCGATTTCAGCTTCTCTTTGTTTTTCCTTTTTTGGCACCTCGGAAAAACCTCCACGTGTTAGGTTATTCCGCCGATTCCACGGGTGGGGTGCTACCAAGACTCCTGCCTAAACTGAGGGTCGC
GCGAGGCGACTATAGCTTCTTAGCCGCCGAAGCTATCGTTGCCGGTACAGGCGCTCCTTGAATAACCCCCTCCCCCCCACGCTATTGCGCAAATTCCGATTTCAGCTTCTCTTTGTTTTTCCTTTTTTGGCACCTCGGAAAAACCTCCACGTGTTAGGTTATTCCGCCGATTCCACGGGTGGGGTGCTACCAAGACTCCTGCCTAAACTGAGGGTCGC
GCGAGGCGACTATAGCTTCTTAGCCGCCGAAGCTATCGTTGCCGGTACAGGCGCTCCTTGAATAACCCCCTCCCCCCCACGCTATTTACCAAATTCCGATTTCAGCTTCTCTTTGTTTTTCCTTTTTTGGCACCTCGGAAAAACCTCCACGTGTTAGGTTATTCCGCCGATTCCACGGGTGGGGTGCTACCAAGACTCCTGCCTAAACTGAGGGTCGC
GCGAGGCGACTATAGCTTCTTAGCCGCCGAAGCTATCGTTGCCGGTACAGGCGCTCCTTGAATAACCCCCTCCCCCCCACGCTATTAGACAAATTCCGATTTCAGCTTCTCTTTGTTTTTCCTTTTTTGGCACCTCGGAAAAACCTCCACGTGTTAGGTTATTCCGCCGATTCCACGGGTGGGGTGCTACCAAGACTCCTGCCTAAACTGAGGGTCGC
GCGAGGCGACTATAGCTTCTTAGCCGCCGAAGCTATCGTTGCCGGTACAGGCGCTCCTTGAATAACCCCCTCCCCCCCACGCTATTCAAGAAATTCCGATTTCAGCTTCTCTTTGTTTTTCCTTTTTTGGCACCTCGGAAAAACCTCCACGTGTTAGGTTATTCCGCCGATTCCACGGGTGGGGTGCTACCAAGACTCCTGCCTAAACTGAGGGTCGC
GCGAGGCGACTATAGCTTCTTAGCCGCCGAAGCTATCGTTGCCGGTACAGGCGCTCCTTGAATAACCCCCTCCCCCCCACGCTATTCGCAAAATTCCGATTTCAGCTTCTCTTTGTTTTTCCTTTTTTGGCACCTCGGAAAAACCTCCACGTGTTAGGTTATTCCGCCGATTCCACGGGTGGGGTGCTACCAAGACTCCTGCCTAAACTGAGGGTCGC
GCGAGGCGACTATAGCTTCTTAGCCGCCGAAGCTATCGTTGCCGGTACAGGCGCTCCTTGAATAACCCCCTCCCCCCCACGCTATTCCGTAAATTCCGATTTCAGCTTCTCTTTGTTTTTCCTTTTTTGGCACCTCGGAAAAACCTCCACGTGTTAGGTTATTCCGCCGATTCCACGGGTGGGGTGCTACCAAGACTCCTGCCTAAACTGAGGGTCGC
GCGAGGCGACTATAGCTTCTTAGCCGCCGAAGCTATCGTTGCCGGTACAGGCGCTCCTTGAATAACCCCCTCCCCCCCACGCTATTCTCTGAATTCCGATTTCAGCTTCTCTTTGTTTTTCCTTTTTTGGCACCTCGGAAAAACCTCCACGTGTTAGGTTATTCCGCCGATTCCACGGGTGGGGTGCTACCAAGACTCCTGCCTAAACTGAGGGTCGC
GCGAGGCGACTATAGCTTCTTAGCCGCCGAAGCTATCGTTGCCGGTACAGGCGCTCCTTGAATAACCCCCTCCCCCCCACGCTATTCTAATAATTCCGATTTCAGCTTCTCTTTGTTTTTCCTTTTTTGGCACCTCGGAAAAACCTCCACGTGTTAGGTTATTCCGCCGATTCCACGGGTGGGGTGCTACCAAGACTCCTGCCTAAACTGAGGGTCGC
GCGAGGCGACTATAGCTTCTTAGCCGCCGAAGCTATCGTTGCCGGTACAGGCGCTCCTTGAATAACCCCCTCCCCCCCACGCTATTCTGGCAATTCCGATTTCAGCTTCTCTTTGTTTTTCCTTTTTTGGCACCTCGGAAAAACCTCCACGTGTTAGGTTATTCCGCCGATTCCACGGGTGGGGTGCTACCAAGACTCCTGCCTAAACTGAGGGTCGC
GCGAGGCGACTATAGCTTCTTAGCCGCCGAAGCTATCGTTGCCGGTACAGGCGCTCCTTGAATAACCCCCTCCCCCCCACGCTATTCTTAGTATTCCGATTTCAGCTTCTCTTTGTTTTTCCTTTTTTGGCACCTCGGAAAAACCTCCACGTGTTAGGTTATTCCGCCGATTCCACGGGTGGGGTGCTACCAAGACTCCTGCCTAAACTGAGGGTCGC
GCGAGGCGACTATAGCTTCTTAGCCGCCGAAGCTATCGTTGCCGGTACAGGCGCTCCTTGAATAACCCCCTCCCCCCCACGCTATTCTTGCGATTCCGATTTCAGCTTCTCTTTGTTTTTCCTTTTTTGGCACCTCGGAAAAACCTCCACGTGTTAGGTTATTCCGCCGATTCCACGGGTGGGGTGCTACCAAGACTCCTGCCTAAACTGAGGGTCGC
GCGAGGCGACTATAGCTTCTTAGCCGCCGAAGCTATCGTTGCCGGTACAGGCGCTCCTTGAATAACCCCCTCCCCCCCACGCTATTCTTTTCATTCCGATTTCAGCTTCTCTTTGTTTTTCCTTTTTTGGCACCTCGGAAAAACCTCCACGTGTTAGGTTATTCCGCCGATTCCACGGGTGGGGTGCTACCAAGACTCCTGCCTAAACTGAGGGTCGC
GCGAGGCGACTATAGCTTCTTAGCCGCCGAAGCTATCGTTGCCGGTACAGGCGCTCCTTGAATAACCCCCTCCCCCCCACGCTATTCTTCGCTTTCCGATTTCAGCTTCTCTTTGTTTTTCCTTTTTTGGCACCTCGGAAAAACCTCCACGTGTTAGGTTATTCCGCCGATTCCACGGGTGGGGTGCTACCAAGACTCCTGCCTAAACTGAGGGTCGC
GCGAGGCGACTATAGCTTCTTAGCCGCCGAAGCTATCGTTGCCGGTACAGGCGCTCCTTGAATAACCCCCTCCCCCCCACGCTATTCTTCTTCTTCCGATTTCAGCTTCTCTTTGTTTTTCCTTTTTTGGCACCTCGGAAAAACCTCCACGTGTTAGGTTATTCCGCCGATTCCACGGGTGGGGTGCTACCAAGACTCCTGCCTAAACTGAGGGTCGC
GCGAGGCGACTATAGCTTCTTAGCCGCCGAAGCTATCGTTGCCGGTACAGGCGCTCCTTGAATAACCCCCTCCCCCCCACGCTATTCTTCCGGTTCCGATTTCAGCTTCTCTTTGTTTTTCCTTTTTTGGCACCTCGGAAAAACCTCCACGTGTTAGGTTATTCCGCCGATTCCACGGGTGGGGTGCTACCAAGACTCCTGCCTAAACTGAGGGTCGC
GCGAGGCGACTATAGCTTCTTAGCCGCCGAAGCTATCGTTGCCGGTACAGGCGCTCCTTGAATAACCCCCTCCCCCCCACGCTATTCTTCATCGTCCGATTTCAGCTTCTCTTTGTTTTTCCTTTTTTGGCACCTCGGAAAAACCTCCACGTGTTAGGTTATTCCGCCGATTCCACGGGTGGGGTGCTACCAAGACTCCTGCCTAAACTGAGGGTCGC
GCGAGGCGACTATAGCTTCTTAGCCGCCGAAGCTATCGTTGCCGGTACAGGCGCTCCTTGAATAACCCCCTCCCCCCCACGCTATTCTTCACTCTCCGATTTCAGCTTCTCTTTGTTTTTCCTTTTTTGGCACCTCGGAAAAACCTCCACGTGTTAGGTTATTCCGCCGATTCCACGGGTGGGGTGCTACCAAGACTCCTGCCTAAACTGAGGGTCGC
GCGAGGCGACTATAGCTTCTTAGCCGCCGAAGCTATCGTTGCCGGTACAGGCGCTCCTTGAATAACCCCCTCCCCCCCACGCTATTCTTCAGTATCCGATTTCAGCTTCTCTTTGTTTTTCCTTTTTTGGCACCTCGGAAAAACCTCCACGTGTTAGGTTATTCCGCCGATTCCACGGGTGGGGTGCTACCAAGACTCCTGCCTAAACTGAGGGTCGC
GCGAGGCGACTATAGCTTCTTAGCCGCCGAAGCTATCGTTGCCGGTACAGGCGCTCCTTGAATAACCCCCTCCCCCCCACGCTATTCTTCAATCACCGATTTCAGCTTCTCTTTGTTTTTCCTTTTTTGGCACCTCGGAAAAACCTCCACGTGTTAGGTTATTCCGCCGATTCCACGGGTGGGGTGCTACCAAGACTCCTGCCTAAACTGAGGGTCGC
GCGAGGCGACTATAGCTTCTTAGCCGCCGAAGCTATCGTTGCCGGTACAGGCGCTCCTTGAATAACCCCCTCCCCCCCACGCTATTCTTCAACACCCGATTTCAGCTTCTCTTTGTTTTTCCTTTTTTGGCACCTCGGAAAAACCTCCACGTGTTAGGTTATTCCGCCGATTCCACGGGTGGGGTGCTACCAAGACTCCTGCCTAAACTGAGGGTCGC
GCGAGGCGACTATAGCTTCTTAGCCGCCGAAGCTATCGTTGCCGGTACAGGCGCTCCTTGAATAACCCCCTCCCCCCCACGCTATTCTTCAAGGGCCGATTTCAGCTTCTCTTTGTTTTTCCTTTTTTGGCACCTCGGAAAAACCTCCACGTGTTAGGTTATTCCGCCGATTCCACGGGTGGGGTGCTACCAAGACTCCTGCCTAAACTGAGGGTCGC
GCGAGGCGACTATAGCTTCTTAGCCGCCGAAGCTATCGTTGCCGGTACAGGCGCTCCTTGAATAACCCCCTCCCCCCCACGCTATTCTTCAAACAGCGATTTCAGCTTCTCTTTGTTTTTCCTTTTTTGGCACCTCGGAAAAACCTCCACGTGTTAGGTTATTCCGCCGATTCCACGGGTGGGGTGCTACCAAGACTCCTGCCTAAACTGAGGGTCGC
GCGAGGCGACTATAGCTTCTTAGCCGCCGAAGCTATCGTTGCCGGTACAGGCGCTCCTTGAATAACCCCCTCCCCCCCACGCTATTCTTCAAAGGTCGATTTCAGCTTCTCTTTGTTTTTCCTTTTTTGGCACCTCGGAAAAACCTCCACGTGTTAGGTTATTCCGCCGATTCCACGGGTGGGGTGCTACCAAGACTCCTGCCTAAACTGAGGGTCGC
GCGAGGCGACTATAGCTTCTTAGCCGCCGAAGCTATCGTTGCCGGTACAGGCGCTCCTTGAATAACCCCCTCCCCCCCACGCTATTCTTCAAAACACGATTTCAGCTTCTCTTTGTTTTTCCTTTTTTGGCACCTCGGAAAAACCTCCACGTGTTAGGTTATTCCGCCGATTCCACGGGTGGGGTGCTACCAAGACTCCTGCCTAAACTGAGGGTCGC
GCGAGGCGACTATAGCTTCTTAGCCGCCGAAGCTATCGTTGCCGGTACAGGCGCTCCTTGAATAACCCCCTCCCCCCCACGCTATTCTTCAAATGTGGATTTCAGCTTCTCTTTGTTTTTCCTTTTTTGGCACCTCGGAAAAACCTCCACGTGTTAGGTTATTCCGCCGATTCCACGGGTGGGGTGCTACCAAGACTCCTGCCTAAACTGAGGGTCGC
GCGAGGCGACTATAGCTTCTTAGCCGCCGAAGCTATCGTTGCCGGTACAGGCGCTCCTTGAATAACCCCCTCCCCCCCACGCTATTCTTCAAATCGAGATTTCAGCTTCTCTTTGTTTTTCCTTTTTTGGCACCTCGGAAAAACCTCCACGTGTTAGGTTATTCCGCCGATTCCACGGGTGGGGTGCTACCAAGACTCCTGCCTAAACTGAGGGTCGC
GCGAGGCGACTATAGCTTCTTAGCCGCCGAAGCTATCGTTGCCGGTACAGGCGCTCCTTGAATAACCCCCTCCCCCCCACGCTATTCTTCAAATAATGATTTCAGCTTCTCTTTGTTTTTCCTTTTTTGGCACCTCGGAAAAACCTCCACGTGTTAGGTTATTCCGCCGATTCCACGGGTGGGGTGCTACCAAGACTCCTGCCTAAACTGAGGGTCGC
GCGAGGCGACTATAGCTTCTTAGCCGCCGAAGCTATCGTTGCCGGTACAGGCGCTCCTTGAATAACCCCCTCCCCCCCACGCTATTCTTCAAATTATAATTTCAGCTTCTCTTTGTTTTTCCTTTTTTGGCACCTCGGAAAAACCTCCACGTGTTAGGTTATTCCGCCGATTCCACGGGTGGGGTGCTACCAAGACTCCTGCCTAAACTGAGGGTCGC
GCGAGGCGACTATAGCTTCTTAGCCGCCGAAGCTATCGTTGCCGGTACAGGCGCTCCTTGAATAACCCCCTCCCCCCCACGCTATTCTTCAAATTGGTATTTCAGCTTCTCTTTGTTTTTCCTTTTTTGGCACCTCGGAAAAACCTCCACGTGTTAGGTTATTCCGCCGATTCCACGGGTGGGGTGCTACCAAGACTCCTGCCTAAACTGAGGGTCGC
GCGAGGCGACTATAGCTTCTTAGCCGCCGAAGCTATCGTTGCCGGTACAGGCGCTCCTTGAATAACCCCCTCCCCCCCACGCTATTCTTCAAATTTACATTTCAGCTTCTCTTTGTTTTTCCTTTTTTGGCACCTCGGAAAAACCTCCACGTGTTAGGTTATTCCGCCGATTCCACGGGTGGGGTGCTACCAAGACTCCTGCCTAAACTGAGGGTCGC
GCGAGGCGACTATAGCTTCTTAGCCGCCGAAGCTATCGTTGCCGGTACAGGCGCTCCTTGAATAACCCCCTCCCCCCCACGCTATTCTTCAAATTCGCTTTTCAGCTTCTCTTTGTTTTTCCTTTTTTGGCACCTCGGAAAAACCTCCACGTGTTAGGTTATTCCGCCGATTCCACGGGTGGGGTGCTACCAAGACTCCTGCCTAAACTGAGGGTCGC
GCGAGGCGACTATAGCTTCTTAGCCGCCGAAGCTATCGTTGCCGGTACAGGCGCTCCTTGAATAACCCCCTCCCCCCCACGCTATTCTTCAAATTCATCTTTCAGCTTCTCTTTGTTTTTCCTTTTTTGGCACCTCGGAAAAACCTCCACGTGTTAGGTTATTCCGCCGATTCCACGGGTGGGGTGCTACCAAGACTCCTGCCTAAACTGAGGGTCGC
GCGAGGCGACTATAGCTTCTTAGCCGCCGAAGCTATCGTTGCCGGTACAGGCGCTCCTTGAATAACCCCCTCCCCCCCACGCTATTCTTCAAATTCTAGTTTCAGCTTCTCTTTGTTTTTCCTTTTTTGGCACCTCGGAAAAACCTCCACGTGTTAGGTTATTCCGCCGATTCCACGGGTGGGGTGCTACCAAGACTCCTGCCTAAACTGAGGGTCGC
GCGAGGCGACTATAGCTTCTTAGCCGCCGAAGCTATCGTTGCCGGTACAGGCGCTCCTTGAATAACCCCCTCCCCCCCACGCTATTCTTCAAATTCCTGGTTCAGCTTCTCTTTGTTTTTCCTTTTTTGGCACCTCGGAAAAACCTCCACGTGTTAGGTTATTCCGCCGATTCCACGGGTGGGGTGCTACCAAGACTCCTGCCTAAACTGAGGGTCGC
GCGAGGCGACTATAGCTTCTTAGCCGCCGAAGCTATCGTTGCCGGTACAGGCGCTCCTTGAATAACCCCCTCCCCCCCACGCTATTCTTCAAATTCCATATTCAGCTTCTCTTTGTTTTTCCTTTTTTGGCACCTCGGAAAAACCTCCACGTGTTAGGTTATTCCGCCGATTCCACGGGTGGGGTGCTACCAAGACTCCTGCCTAAACTGAGGGTCGC
GCGAGGCGACTATAGCTTCTTAGCCGCCGAAGCTATCGTTGCCGGTACAGGCGCTCCTTGAATAACCCCCTCCCCCCCACGCTATTCTTCAAATTCCCCCTTCAGCTTCTCTTTGTTTTTCCTTTTTTGGCACCTCGGAAAAACCTCCACGTGTTAGGTTATTCCGCCGATTCCACGGGTGGGGTGCTACCAAGACTCCTGCCTAAACTGAGGGTCGC
GCGAGGCGACTATAGCTTCTTAGCCGCCGAAGCTATCGTTGCCGGTACAGGCGCTCCTTGAATAACCCCCTCCCCCCCACGCTATTCTTCAAATTCCGCGGTCAGCTTCTCTTTGTTTTTCCTTTTTTGGCACCTCGGAAAAACCTCCACGTGTTAGGTTATTCCGCCGATTCCACGGGTGGGGTGCTACCAAGACTCCTGCCTAAACTGAGGGTCGC
GCGAGGCGACTATAGCTTCTTAGCCGCCGAAGCTATCGTTGCCGGTACAGGCGCTCCTTGAATAACCCCCTCCCCCCCACGCTATTCTTCAAATTCCGGCCTCAGCTTCTCTTTGTTTTTCCTTTTTTGGCACCTCGGAAAAACCTCCACGTGTTAGGTTATTCCGCCGATTCCACGGGTGGGGTGCTACCAAGACTCCTGCCTAAACTGAGGGTCGC
GCGAGGCGACTATAGCTTCTTAGCCGCCGAAGCTATCGTTGCCGGTACAGGCGCTCCTTGAATAACCCCCTCCCCCCCACGCTATTCTTCAAATTCCGTAATCAGCTTCTCTTTGTTTTTCCTTTTTTGGCACCTCGGAAAAACCTCCACGTGTTAGGTTATTCCGCCGATTCCACGGGTGGGGTGCTACCAAGACTCCTGCCTAAACTGAGGGTCGC
GCGAGGCGACTATAGCTTCTTAGCCGCCGAAGCTATCGTTGCCGGTACAGGCGCTCCTTGAATAACCCCCTCCCCCCCACGCTATTCTTCAAATTCCGAGCGCAGCTTCTCTTTGTTTTTCCTTTTTTGGCACCTCGGAAAAACCTCCACGTGTTAGGTTATTCCGCCGATTCCACGGGTGGGGTGCTACCAAGACTCCTGCCTAAACTGAGGGTCGC
GCGAGGCGACTATAGCTTCTTAGCCGCCGAAGCTATCGTTGCCGGTACAGGCGCTCCTTGAATAACCCCCTCCCCCCCACGCTATTCTTCAAATTCCGAAAACAGCTTCTCTTTGTTTTTCCTTTTTTGGCACCTCGGAAAAACCTCCACGTGTTAGGTTATTCCGCCGATTCCACGGGTGGGGTGCTACCAAGACTCCTGCCTAAACTGAGGGTCGC
GCGAGGCGACTATAGCTTCTTAGCCGCCGAAGCTATCGTTGCCGGTACAGGCGCTCCTTGAATAACCCCCTCCCCCCCACGCTATTCTTCAAATTCCGACGCCAGCTTCTCTTTGTTTTTCCTTTTTTGGCACCTCGGAAAAACCTCCACGTGTTAGGTTATTCCGCCGATTCCACGGGTGGGGTGCTACCAAGACTCCTGCCTAAACTGAGGGTCGC
GCGAGGCGACTATAGCTTCTTAGCCGCCGAAGCTATCGTTGCCGGTACAGGCGCTCCTTGAATAACCCCCTCCCCCCCACGCTATTCTTCAAATTCCGATGGAAGCTTCTCTTTGTTTTTCCTTTTTTGGCACCTCGGAAAAACCTCCACGTGTTAGGTTATTCCGCCGATTCCACGGGTGGGGTGCTACCAAGACTCCTGCCTAAACTGAGGGTCGC
GCGAGGCGACTATAGCTTCTTAGCCGCCGAAGCTATCGTTGCCGGTACAGGCGCTCCTTGAATAACCCCCTCCCCCCCACGCTATTCTTCAAATTCCGATACTAGCTTCTCTTTGTTTTTCCTTTTTTGGCACCTCGGAAAAACCTCCACGTGTTAGGTTATTCCGCCGATTCCACGGGTGGGGTGCTACCAAGACTCCTGCCTAAACTGAGGGTCGC
GCGAGGCGACTATAGCTTCTTAGCCGCCGAAGCTATCGTTGCCGGTACAGGCGCTCCTTGAATAACCCCCTCCCCCCCACGCTATTCTTCAAATTCCGATGAGAGCTTCTCTTTGTTTTTCCTTTTTTGGCACCTCGGAAAAACCTCCACGTGTTAGGTTATTCCGCCGATTCCACGGGTGGGGTGCTACCAAGACTCCTGCCTAAACTGAGGGTCGC
GCGAGGCGACTATAGCTTCTTAGCCGCCGAAGCTATCGTTGCCGGTACAGGCGCTCCTTGAATAACCCCCTCCCCCCCACGCTATTCTTCAAATTCCGATTATCGCTTCTCTTTGTTTTTCCTTTTTTGGCACCTCGGAAAAACCTCCACGTGTTAGGTTATTCCGCCGATTCCACGGGTGGGGTGCTACCAAGACTCCTGCCTAAACTGAGGGTCGC
GCGAGGCGACTATAGCTTCTTAGCCGCCGAAGCTATCGTTGCCGGTACAGGCGCTCCTTGAATAACCCCCTCCCCCCCACGCTATTCTTCAAATTCCGATTCGTGCTTCTCTTTGTTTTTCCTTTTTTGGCACCTCGGAAAAACCTCCACGTGTTAGGTTATTCCGCCGATTCCACGGGTGGGGTGCTACCAAGACTCCTGCCTAAACTGAGGGTCGC
GCGAGGCGACTATAGCTTCTTAGCCGCCGAAGCTATCGTTGCCGGTACAGGCGCTCCTTGAATAACCCCCTCCCCCCCACGCTATTCTTCAAATTCCGATTGAGGCTTCTCTTTGTTTTTCCTTTTTTGGCACCTCGGAAAAACCTCCACGTGTTAGGTTATTCCGCCGATTCCACGGGTGGGGTGCTACCAAGACTCCTGCCTAAACTGAGGGTCGC
GCGAGGCGACTATAGCTTCTTAGCCGCCGAAGCTATCGTTGCCGGTACAGGCGCTCCTTGAATAACCCCCTCCCCCCCACGCTATTCTTCAAATTCCGATTTTGACTTCTCTTTGTTTTTCCTTTTTTGGCACCTCGGAAAAACCTCCACGTGTTAGGTTATTCCGCCGATTCCACGGGTGGGGTGCTACCAAGACTCCTGCCTAAACTGAGGGTCGC
GCGAGGCGACTATAGCTTCTTAGCCGCCGAAGCTATCGTTGCCGGTACAGGCGCTCCTTGAATAACCCCCTCCCCCCCACGCTATTCTTCAAATTCCGATTTATCCTTCTCTTTGTTTTTCCTTTTTTGGCACCTCGGAAAAACCTCCACGTGTTAGGTTATTCCGCCGATTCCACGGGTGGGGTGCTACCAAGACTCCTGCCTAAACTGAGGGTCGC
GCGAGGCGACTATAGCTTCTTAGCCGCCGAAGCTATCGTTGCCGGTACAGGCGCTCCTTGAATAACCCCCTCCCCCCCACGCTATTCTTCAAATTCCGATTTGCTCTTCTCTTTGTTTTTCCTTTTTTGGCACCTCGGAAAAACCTCCACGTGTTAGGTTATTCCGCCGATTCCACGGGTGGGGTGCTACCAAGACTCCTGCCTAAACTGAGGGTCGC
GCGAGGCGACTATAGCTTCTTAGCCGCCGAAGCTATCGTTGCCGGTACAGGCGCTCCTTGAATAACCCCCTCCCCCCCACGCTATTCTTCAAATTCCGATTTCGCGTTCTCTTTGTTTTTCCTTTTTTGGCACCTCGGAAAAACCTCCACGTGTTAGGTTATTCCGCCGATTCCACGGGTGGGGTGCTACCAAGACTCCTGCCTAAACTGAGGGTCGC
GCGAGGCGACTATAGCTTCTTAGCCGCCGAAGCTATCGTTGCCGGTACAGGCGCTCCTTGAATAACCCCCTCCCCCCCACGCTATTCTTCAAATTCCGATTTCTTTTTCTCTTTGTTTTTCCTTTTTTGGCACCTCGGAAAAACCTCCACGTGTTAGGTTATTCCGCCGATTCCACGGGTGGGGTGCTACCAAGACTCCTGCCTAAACTGAGGGTCGC
GCGAGGCGACTATAGCTTCTTAGCCGCCGAAGCTATCGTTGCCGGTACAGGCGCTCCTTGAATAACCCCCTCCCCCCCACGCTATTCTTCAAATTCCGATTTCCAATTCTCTTTGTTTTTCCTTTTTTGGCACCTCGGAAAAACCTCCACGTGTTAGGTTATTCCGCCGATTCCACGGGTGGGGTGCTACCAAGACTCCTGCCTAAACTGAGGGTCGC
GCGAGGCGACTATAGCTTCTTAGCCGCCGAAGCTATCGTTGCCGGTACAGGCGCTCCTTGAATAACCCCCTCCCCCCCACGCTATTCTTCAAATTCCGATTTCACTGTCTCTTTGTTTTTCCTTTTTTGGCACCTCGGAAAAACCTCCACGTGTTAGGTTATTCCGCCGATTCCACGGGTGGGGTGCTACCAAGACTCCTGCCTAAACTGAGGGTCGC
GCGAGGCGACTATAGCTTCTTAGCCGCCGAAGCTATCGTTGCCGGTACAGGCGCTCCTTGAATAACCCCCTCCCCCCCACGCTATTCTTCAAATTCCGATTTCATAATCTCTTTGTTTTTCCTTTTTTGGCACCTCGGAAAAACCTCCACGTGTTAGGTTATTCCGCCGATTCCACGGGTGGGGTGCTACCAAGACTCCTGCCTAAACTGAGGGTCGC
GCGAGGCGACTATAGCTTCTTAGCCGCCGAAGCTATCGTTGCCGGTACAGGCGCTCCTTGAATAACCCCCTCCCCCCCACGCTATTCTTCAAATTCCGATTTCAAGCTCTCTTTGTTTTTCCTTTTTTGGCACCTCGGAAAAACCTCCACGTGTTAGGTTATTCCGCCGATTCCACGGGTGGGGTGCTACCAAGACTCCTGCCTAAACTGAGGGTCGC
GCGAGGCGACTATAGCTTCTTAGCCGCCGAAGCTATCGTTGCCGGTACAGGCGCTCCTTGAATAACCCCCTCCCCCCCACGCTATTCTTCAAATTCCGATTTCAGTACCTCTTTGTTTTTCCTTTTTTGGCACCTCGGAAAAACCTCCACGTGTTAGGTTATTCCGCCGATTCCACGGGTGGGGTGCTACCAAGACTCCTGCCTAAACTGAGGGTCGC
GCGAGGCGACTATAGCTTCTTAGCCGCCGAAGCTATCGTTGCCGGTACAGGCGCTCCTTGAATAACCCCCTCCCCCCCACGCTATTCTTCAAATTCCGATTTCAGGCGCTCTTTGTTTTTCCTTTTTTGGCACCTCGGAAAAACCTCCACGTGTTAGGTTATTCCGCCGATTCCACGGGTGGGGTGCTACCAAGACTCCTGCCTAAACTGAGGGTCGC
GCGAGGCGACTATAGCTTCTTAGCCGCCGAAGCTATCGTTGCCGGTACAGGCGCTCCTTGAATAACCCCCTCCCCCCCACGCTATTCTTCAAATTCCGATTTCAGAGACTCTTTGTTTTTCCTTTTTTGGCACCTCGGAAAAACCTCCACGTGTTAGGTTATTCCGCCGATTCCACGGGTGGGGTGCTACCAAGACTCCTGCCTAAACTGAGGGTCGC
GCGAGGCGACTATAGCTTCTTAGCCGCCGAAGCTATCGTTGCCGGTACAGGCGCTCCTTGAATAACCCCCTCCCCCCCACGCTATTCTTCAAATTCCGATTTCAGCCAATCTTTGTTTTTCCTTTTTTGGCACCTCGGAAAAACCTCCACGTGTTAGGTTATTCCGCCGATTCCACGGGTGGGGTGCTACCAAGACTCCTGCCTAAACTGAGGGTCGC
GCGAGGCGACTATAGCTTCTTAGCCGCCGAAGCTATCGTTGCCGGTACAGGCGCTCCTTGAATAACCCCCTCCCCCCCACGCTATTCTTCAAATTCCGATTTCAGCAGGTCTTTGTTTTTCCTTTTTTGGCACCTCGGAAAAACCTCCACGTGTTAGGTTATTCCGCCGATTCCACGGGTGGGGTGCTACCAAGACTCCTGCCTAAACTGAGGGTCGC
GCGAGGCGACTATAGCTTCTTAGCCGCCGAAGCTATCGTTGCCGGTACAGGCGCTCCTTGAATAACCCCCTCCCCCCCACGCTATTCTTCAAATTCCGATTTCAGCGCTTCTTTGTTTTTCCTTTTTTGGCACCTCGGAAAAACCTCCACGTGTTAGGTTATTCCGCCGATTCCACGGGTGGGGTGCTACCAAGACTCCTGCCTAAACTGAGGGTCGC
GCGAGGCGACTATAGCTTCTTAGCCGCCGAAGCTATCGTTGCCGGTACAGGCGCTCCTTGAATAACCCCCTCCCCCCCACGCTATTCTTCAAATTCCGATTTCAGCTCGACTTTGTTTTTCCTTTTTTGGCACCTCGGAAAAACCTCCACGTGTTAGGTTATTCCGCCGATTCCACGGGTGGGGTGCTACCAAGACTCCTGCCTAAACTGAGGGTCGC
GCGAGGCGACTATAGCTTCTTAGCCGCCGAAGCTATCGTTGCCGGTACAGGCGCTCCTTGAATAACCCCCTCCCCCCCACGCTATTCTTCAAATTCCGATTTCAGCTGACCTTTGTTTTTCCTTTTTTGGCACCTCGGAAAAACCTCCACGTGTTAGGTTATTCCGCCGATTCCACGGGTGGGGTGCTACCAAGACTCCTGCCTAAACTGAGGGTCGC
GCGAGGCGACTATAGCTTCTTAGCCGCCGAAGCTATCGTTGCCGGTACAGGCGCTCCTTGAATAACCCCCTCCCCCCCACGCTATTCTTCAAATTCCGATTTCAGCTATGCTTTGTTTTTCCTTTTTTGGCACCTCGGAAAAACCTCCACGTGTTAGGTTATTCCGCCGATTCCACGGGTGGGGTGCTACCAAGACTCCTGCCTAAACTGAGGGTCGC
GCGAGGCGACTATAGCTTCTTAGCCGCCGAAGCTATCGTTGCCGGTACAGGCGCTCCTTGAATAACCCCCTCCCCCCCACGCTATTCTTCAAATTCCGATTTCAGCTTACGTTTGTTTTTCCTTTTTTGGCACCTCGGAAAAACCTCCACGTGTTAGGTTATTCCGCCGATTCCACGGGTGGGGTGCTACCAAGACTCCTGCCTAAACTGAGGGTCGC
GCGAGGCGACTATAGCTTCTTAGCCGCCGAAGCTATCGTTGCCGGTACAGGCGCTCCTTGAATAACCCCCTCCCCCCCACGCTATTCTTCAAATTCCGATTTCAGCTTTAATTTGTTTTTCCTTTTTTGGCACCTCGGAAAAACCTCCACGTGTTAGGTTATTCCGCCGATTCCACGGGTGGGGTGCTACCAAGACTCCTGCCTAAACTGAGGGTCGC
GCGAGGCGACTATAGCTTCTTAGCCGCCGAAGCTATCGTTGCCGGTACAGGCGCTCCTTGAATAACCCCCTCCCCCCCACGCTATTCTTCAAATTCCGATTTCAGCTTGGTTTTGTTTTTCCTTTTTTGGCACCTCGGAAAAACCTCCACGTGTTAGGTTATTCCGCCGATTCCACGGGTGGGGTGCTACCAAGACTCCTGCCTAAACTGAGGGTCGC
GCGAGGCGACTATAGCTTCTTAGCCGCCGAAGCTATCGTTGCCGGTACAGGCGCTCCTTGAATAACCCCCTCCCCCCCACGCTATTCTTCAAATTCCGATTTCAGCTTCGTATTGTTTTTCCTTTTTTGGCACCTCGGAAAAACCTCCACGTGTTAGGTTATTCCGCCGATTCCACGGGTGGGGTGCTACCAAGACTCCTGCCTAAACTGAGGGTCGC
GCGAGGCGACTATAGCTTCTTAGCCGCCGAAGCTATCGTTGCCGGTACAGGCGCTCCTTGAATAACCCCCTCCCCCCCACGCTATTCTTCAAATTCCGATTTCAGCTTCCAGTTGTTTTTCCTTTTTTGGCACCTCGGAAAAACCTCCACGTGTTAGGTTATTCCGCCGATTCCACGGGTGGGGTGCTACCAAGACTCCTGCCTAAACTGAGGGTCGC
GCGAGGCGACTATAGCTTCTTAGCCGCCGAAGCTATCGTTGCCGGTACAGGCGCTCCTTGAATAACCCCCTCCCCCCCACGCTATTCTTCAAATTCCGATTTCAGCTTCAGCTTGTTTTTCCTTTTTTGGCACCTCGGAAAAACCTCCACGTGTTAGGTTATTCCGCCGATTCCACGGGTGGGGTGCTACCAAGACTCCTGCCTAAACTGAGGGTCGC
GCGAGGCGACTATAGCTTCTTAGCCGCCGAAGCTATCGTTGCCGGTACAGGCGCTCCTTGAATAACCCCCTCCCCCCCACGCTATTCTTCAAATTCCGATTTCAGCTTCTTGGTGTTTTTCCTTTTTTGGCACCTCGGAAAAACCTCCACGTGTTAGGTTATTCCGCCGATTCCACGGGTGGGGTGCTACCAAGACTCCTGCCTAAACTGAGGGTCGC
GCGAGGCGACTATAGCTTCTTAGCCGCCGAAGCTATCGTTGCCGGTACAGGCGCTCCTTGAATAACCCCCTCCCCCCCACGCTATTCTTCAAATTCCGATTTCAGCTTCTGCATGTTTTTCCTTTTTTGGCACCTCGGAAAAACCTCCACGTGTTAGGTTATTCCGCCGATTCCACGGGTGGGGTGCTACCAAGACTCCTGCCTAAACTGAGGGTCGC
GCGAGGCGACTATAGCTTCTTAGCCGCCGAAGCTATCGTTGCCGGTACAGGCGCTCCTTGAATAACCCCCTCCCCCCCACGCTATTCTTCAAATTCCGATTTCAGCTTCTAACTGTTTTTCCTTTTTTGGCACCTCGGAAAAACCTCCACGTGTTAGGTTATTCCGCCGATTCCACGGGTGGGGTGCTACCAAGACTCCTGCCTAAACTGAGGGTCGC
GCGAGGCGACTATAGCTTCTTAGCCGCCGAAGCTATCGTTGCCGGTACAGGCGCTCCTTGAATAACCCCCTCCCCCCCACGCTATTCTTCAAATTCCGATTTCAGCTTCTCCGAGTTTTTCCTTTTTTGGCACCTCGGAAAAACCTCCACGTGTTAGGTTATTCCGCCGATTCCACGGGTGGGGTGCTACCAAGACTCCTGCCTAAACTGAGGGTCGC
GCGAGGCGACTATAGCTTCTTAGCCGCCGAAGCTATCGTTGCCGGTACAGGCGCTCCTTGAATAACCCCCTCCCCCCCACGCTATTCTTCAAATTCCGATTTCAGCTTCTCGAGGTTTTTCCTTTTTTGGCACCTCGGAAAAACCTCCACGTGTTAGGTTATTCCGCCGATTCCACGGGTGGGGTGCTACCAAGACTCCTGCCTAAACTGAGGGTCGC
GCGAGGCGACTATAGCTTCTTAGCCGCCGAAGCTATCGTTGCCGGTACAGGCGCTCCTTGAATAACCCCCTCCCCCCCACGCTATTCTTCAAATTCCGATTTCAGCTTCTCACCGTTTTTCCTTTTTTGGCACCTCGGAAAAACCTCCACGTGTTAGGTTATTCCGCCGATTCCACGGGTGGGGTGCTACCAAGACTCCTGCCTAAACTGAGGGTCGC
GCGAGGCGACTATAGCTTCTTAGCCGCCGAAGCTATCGTTGCCGGTACAGGCGCTCCTTGAATAACCCCCTCCCCCCCACGCTATTCTTCAAATTCCGATTTCAGCTTCTCTGCATTTTTCCTTTTTTGGCACCTCGGAAAAACCTCCACGTGTTAGGTTATTCCGCCGATTCCACGGGTGGGGTGCTACCAAGACTCCTGCCTAAACTGAGGGTCGC
GCGAGGCGACTATAGCTTCTTAGCCGCCGAAGCTATCGTTGCCGGTACAGGCGCTCCTTGAATAACCCCCTCCCCCCCACGCTATTCTTCAAATTCCGATTTCAGCTTCTCTAACTTTTTCCTTTTTTGGCACCTCGGAAAAACCTCCACGTGTTAGGTTATTCCGCCGATTCCACGGGTGGGGTGCTACCAAGACTCCTGCCTAAACTGAGGGTCGC
GCGAGGCGACTATAGCTTCTTAGCCGCCGAAGCTATCGTTGCCGGTACAGGCGCTCCTTGAATAACCCCCTCCCCCCCACGCTATTCTTCAAATTCCGATTTCAGCTTCTCTCGTTTTTTCCTTTTTTGGCACCTCGGAAAAACCTCCACGTGTTAGGTTATTCCGCCGATTCCACGGGTGGGGTGCTACCAAGACTCCTGCCTAAACTGAGGGTCGC
GCGAGGCGACTATAGCTTCTTAGCCGCCGAAGCTATCGTTGCCGGTACAGGCGCTCCTTGAATAACCCCCTCCCCCCCACGCTATTCTTCAAATTCCGATTTCAGCTTCTCTTATCTTTTCCTTTTTTGGCACCTCGGAAAAACCTCCACGTGTTAGGTTATTCCGCCGATTCCACGGGTGGGGTGCTACCAAGACTCCTGCCTAAACTGAGGGTCGC
GCGAGGCGACTATAGCTTCTTAGCCGCCGAAGCTATCGTTGCCGGTACAGGCGCTCCTTGAATAACCCCCTCCCCCCCACGCTATTCTTCAAATTCCGATTTCAGCTTCTCTTCAATTTTCCTTTTTTGGCACCTCGGAAAAACCTCCACGTGTTAGGTTATTCCGCCGATTCCACGGGTGGGGTGCTACCAAGACTCCTGCCTAAACTGAGGGTCGC
GCGAGGCGACTATAGCTTCTTAGCCGCCGAAGCTATCGTTGCCGGTACAGGCGCTCCTTGAATAACCCCCTCCCCCCCACGCTATTCTTCAAATTCCGATTTCAGCTTCTCTTGCGTTTTCCTTTTTTGGCACCTCGGAAAAACCTCCACGTGTTAGGTTATTCCGCCGATTCCACGGGTGGGGTGCTACCAAGACTCCTGCCTAAACTGAGGGTCGC
GCGAGGCGACTATAGCTTCTTAGCCGCCGAAGCTATCGTTGCCGGTACAGGCGCTCCTTGAATAACCCCCTCCCCCCCACGCTATTCTTCAAATTCCGATTTCAGCTTCTCTTTTAATTTCCTTTTTTGGCACCTCGGAAAAACCTCCACGTGTTAGGTTATTCCGCCGATTCCACGGGTGGGGTGCTACCAAGACTCCTGCCTAAACTGAGGGTCGC
GCGAGGCGACTATAGCTTCTTAGCCGCCGAAGCTATCGTTGCCGGTACAGGCGCTCCTTGAATAACCCCCTCCCCCCCACGCTATTCTTCAAATTCCGATTTCAGCTTCTCTTTCCGTTTCCTTTTTTGGCACCTCGGAAAAACCTCCACGTGTTAGGTTATTCCGCCGATTCCACGGGTGGGGTGCTACCAAGACTCCTGCCTAAACTGAGGGTCGC
GCGAGGCGACTATAGCTTCTTAGCCGCCGAAGCTATCGTTGCCGGTACAGGCGCTCCTTGAATAACCCCCTCCCCCCCACGCTATTCTTCAAATTCCGATTTCAGCTTCTCTTTAGCTTTCCTTTTTTGGCACCTCGGAAAAACCTCCACGTGTTAGGTTATTCCGCCGATTCCACGGGTGGGGTGCTACCAAGACTCCTGCCTAAACTGAGGGTCGC
GCGAGGCGACTATAGCTTCTTAGCCGCCGAAGCTATCGTTGCCGGTACAGGCGCTCCTTGAATAACCCCCTCCCCCCCACGCTATTCTTCAAATTCCGATTTCAGCTTCTCTTTGGCCTTCCTTTTTTGGCACCTCGGAAAAACCTCCACGTGTTAGGTTATTCCGCCGATTCCACGGGTGGGGTGCTACCAAGACTCCTGCCTAAACTGAGGGTCGC
GCGAGGCGACTATAGCTTCTTAGCCGCCGAAGCTATCGTTGCCGGTACAGGCGCTCCTTGAATAACCCCCTCCCCCCCACGCTATTCTTCAAATTCCGATTTCAGCTTCTCTTTGCGGTTCCTTTTTTGGCACCTCGGAAAAACCTCCACGTGTTAGGTTATTCCGCCGATTCCACGGGTGGGGTGCTACCAAGACTCCTGCCTAAACTGAGGGTCGC
GCGAGGCGACTATAGCTTCTTAGCCGCCGAAGCTATCGTTGCCGGTACAGGCGCTCCTTGAATAACCCCCTCCCCCCCACGCTATTCTTCAAATTCCGATTTCAGCTTCTCTTTGAAATTCCTTTTTTGGCACCTCGGAAAAACCTCCACGTGTTAGGTTATTCCGCCGATTCCACGGGTGGGGTGCTACCAAGACTCCTGCCTAAACTGAGGGTCGC
GCGAGGCGACTATAGCTTCTTAGCCGCCGAAGCTATCGTTGCCGGTACAGGCGCTCCTTGAATAACCCCCTCCCCCCCACGCTATTCTTCAAATTCCGATTTCAGCTTCTCTTTGTGAGTCCTTTTTTGGCACCTCGGAAAAACCTCCACGTGTTAGGTTATTCCGCCGATTCCACGGGTGGGGTGCTACCAAGACTCCTGCCTAAACTGAGGGTCGC
GCGAGGCGACTATAGCTTCTTAGCCGCCGAAGCTATCGTTGCCGGTACAGGCGCTCCTTGAATAACCCCCTCCCCCCCACGCTATTCTTCAAATTCCGATTTCAGCTTCTCTTTGTCGCTCCTTTTTTGGCACCTCGGAAAAACCTCCACGTGTTAGGTTATTCCGCCGATTCCACGGGTGGGGTGCTACCAAGACTCCTGCCTAAACTGAGGGTCGC
GCGAGGCGACTATAGCTTCTTAGCCGCCGAAGCTATCGTTGCCGGTACAGGCGCTCCTTGAATAACCCCCTCCCCCCCACGCTATTCTTCAAATTCCGATTTCAGCTTCTCTTTGTACATCCTTTTTTGGCACCTCGGAAAAACCTCCACGTGTTAGGTTATTCCGCCGATTCCACGGGTGGGGTGCTACCAAGACTCCTGCCTAAACTGAGGGTCGC
GCGAGGCGACTATAGCTTCTTAGCCGCCGAAGCTATCGTTGCCGGTACAGGCGCTCCTTGAATAACCCCCTCCCCCCCACGCTATTCTTCAAATTCCGATTTCAGCTTCTCTTTGTTGACCCTTTTTTGGCACCTCGGAAAAACCTCCACGTGTTAGGTTATTCCGCCGATTCCACGGGTGGGGTGCTACCAAGACTCCTGCCTAAACTGAGGGTCGC
GCGAGGCGACTATAGCTTCTTAGCCGCCGAAGCTATCGTTGCCGGTACAGGCGCTCCTTGAATAACCCCCTCCCCCCCACGCTATTCTTCAAATTCCGATTTCAGCTTCTCTTTGTTACGCCTTTTTTGGCACCTCGGAAAAACCTCCACGTGTTAGGTTATTCCGCCGATTCCACGGGTGGGGTGCTACCAAGACTCCTGCCTAAACTGAGGGTCGC
GCGAGGCGACTATAGCTTCTTAGCCGCCGAAGCTATCGTTGCCGGTACAGGCGCTCCTTGAATAACCCCCTCCCCCCCACGCTATTCTTCAAATTCCGATTTCAGCTTCTCTTTGTTCGACCTTTTTTGGCACCTCGGAAAAACCTCCACGTGTTAGGTTATTCCGCCGATTCCACGGGTGGGGTGCTACCAAGACTCCTGCCTAAACTGAGGGTCGC
GCGAGGCGACTATAGCTTCTTAGCCGCCGAAGCTATCGTTGCCGGTACAGGCGCTCCTTGAATAACCCCCTCCCCCCCACGCTATTCTTCAAATTCCGATTTCAGCTTCTCTTTGTTTCCGCTTTTTTGGCACCTCGGAAAAACCTCCACGTGTTAGGTTATTCCGCCGATTCCACGGGTGGGGTGCTACCAAGACTCCTGCCTAAACTGAGGGTCGC
GCGAGGCGACTATAGCTTCTTAGCCGCCGAAGCTATCGTTGCCGGTACAGGCGCTCCTTGAATAACCCCCTCCCCCCCACGCTATTCTTCAAATTCCGATTTCAGCTTCTCTTTGTTTGGTCTTTTTTGGCACCTCGGAAAAACCTCCACGTGTTAGGTTATTCCGCCGATTCCACGGGTGGGGTGCTACCAAGACTCCTGCCTAAACTGAGGGTCGC
GCGAGGCGACTATAGCTTCTTAGCCGCCGAAGCTATCGTTGCCGGTACAGGCGCTCCTTGAATAACCCCCTCCCCCCCACGCTATTCTTCAAATTCCGATTTCAGCTTCTCTTTGTTTAAACTTTTTTGGCACCTCGGAAAAACCTCCACGTGTTAGGTTATTCCGCCGATTCCACGGGTGGGGTGCTACCAAGACTCCTGCCTAAACTGAGGGTCGC
GCGAGGCGACTATAGCTTCTTAGCCGCCGAAGCTATCGTTGCCGGTACAGGCGCTCCTTGAATAACCCCCTCCCCCCCACGCTATTCTTCAAATTCCGATTTCAGCTTCTCTTTGTTTTCAATTTTTTGGCACCTCGGAAAAACCTCCACGTGTTAGGTTATTCCGCCGATTCCACGGGTGGGGTGCTACCAAGACTCCTGCCTAAACTGAGGGTCGC
GCGAGGCGACTATAGCTTCTTAGCCGCCGAAGCTATCGTTGCCGGTACAGGCGCTCCTTGAATAACCCCCTCCCCCCCACGCTATTCTTCAAATTCCGATTTCAGCTTCTCTTTGTTTTGGTTTTTTTGGCACCTCGGAAAAACCTCCACGTGTTAGGTTATTCCGCCGATTCCACGGGTGGGGTGCTACCAAGACTCCTGCCTAAACTGAGGGTCGC
GCGAGGCGACTATAGCTTCTTAGCCGCCGAAGCTATCGTTGCCGGTACAGGCGCTCCTTGAATAACCCCCTCCCCCCCACGCTATTCTTCAAATTCCGATTTCAGCTTCTCTTTGTTTTATGTTTTTTGGCACCTCGGAAAAACCTCCACGTGTTAGGTTATTCCGCCGATTCCACGGGTGGGGTGCTACCAAGACTCCTGCCTAAACTGAGGGTCGC
GCGAGGCGACTATAGCTTCTTAGCCGCCGAAGCTATCGTTGCCGGTACAGGCGCTCCTTGAATAACCCCCTCCCCCCCACGCTATTCTTCAAATTCCGATTTCAGCTTCTCTTTGTTTTTAAGTTTTTGGCACCTCGGAAAAACCTCCACGTGTTAGGTTATTCCGCCGATTCCACGGGTGGGGTGCTACCAAGACTCCTGCCTAAACTGAGGGTCGC
GCGAGGCGACTATAGCTTCTTAGCCGCCGAAGCTATCGTTGCCGGTACAGGCGCTCCTTGAATAACCCCCTCCCCCCCACGCTATTCTTCAAATTCCGATTTCAGCTTCTCTTTGTTTTTGGATTTTTGGCACCTCGGAAAAACCTCCACGTGTTAGGTTATTCCGCCGATTCCACGGGTGGGGTGCTACCAAGACTCCTGCCTAAACTGAGGGTCGC
GCGAGGCGACTATAGCTTCTTAGCCGCCGAAGCTATCGTTGCCGGTACAGGCGCTCCTTGAATAACCCCCTCCCCCCCACGCTATTCTTCAAATTCCGATTTCAGCTTCTCTTTGTTTTTTTCTTTTTGGCACCTCGGAAAAACCTCCACGTGTTAGGTTATTCCGCCGATTCCACGGGTGGGGTGCTACCAAGACTCCTGCCTAAACTGAGGGTCGC
GCGAGGCGACTATAGCTTCTTAGCCGCCGAAGCTATCGTTGCCGGTACAGGCGCTCCTTGAATAACCCCCTCCCCCCCACGCTATTCTTCAAATTCCGATTTCAGCTTCTCTTTGTTTTTCACCTTTTGGCACCTCGGAAAAACCTCCACGTGTTAGGTTATTCCGCCGATTCCACGGGTGGGGTGCTACCAAGACTCCTGCCTAAACTGAGGGTCGC
GCGAGGCGACTATAGCTTCTTAGCCGCCGAAGCTATCGTTGCCGGTACAGGCGCTCCTTGAATAACCCCCTCCCCCCCACGCTATTCTTCAAATTCCGATTTCAGCTTCTCTTTGTTTTTCTGATTTTGGCACCTCGGAAAAACCTCCACGTGTTAGGTTATTCCGCCGATTCCACGGGTGGGGTGCTACCAAGACTCCTGCCTAAACTGAGGGTCGC
GCGAGGCGACTATAGCTTCTTAGCCGCCGAAGCTATCGTTGCCGGTACAGGCGCTCCTTGAATAACCCCCTCCCCCCCACGCTATTCTTCAAATTCCGATTTCAGCTTCTCTTTGTTTTTCGAGTTTTGGCACCTCGGAAAAACCTCCACGTGTTAGGTTATTCCGCCGATTCCACGGGTGGGGTGCTACCAAGACTCCTGCCTAAACTGAGGGTCGC
GCGAGGCGACTATAGCTTCTTAGCCGCCGAAGCTATCGTTGCCGGTACAGGCGCTCCTTGAATAACCCCCTCCCCCCCACGCTATTCTTCAAATTCCGATTTCAGCTTCTCTTTGTTTTTCCGCGTTTGGCACCTCGGAAAAACCTCCACGTGTTAGGTTATTCCGCCGATTCCACGGGTGGGGTGCTACCAAGACTCCTGCCTAAACTGAGGGTCGC
GCGAGGCGACTATAGCTTCTTAGCCGCCGAAGCTATCGTTGCCGGTACAGGCGCTCCTTGAATAACCCCCTCCCCCCCACGCTATTCTTCAAATTCCGATTTCAGCTTCTCTTTGTTTTTCCAAATTTGGCACCTCGGAAAAACCTCCACGTGTTAGGTTATTCCGCCGATTCCACGGGTGGGGTGCTACCAAGACTCCTGCCTAAACTGAGGGTCGC
GCGAGGCGACTATAGCTTCTTAGCCGCCGAAGCTATCGTTGCCGGTACAGGCGCTCCTTGAATAACCCCCTCCCCCCCACGCTATTCTTCAAATTCCGATTTCAGCTTCTCTTTGTTTTTCCCGCTTTGGCACCTCGGAAAAACCTCCACGTGTTAGGTTATTCCGCCGATTCCACGGGTGGGGTGCTACCAAGACTCCTGCCTAAACTGAGGGTCGC
GCGAGGCGACTATAGCTTCTTAGCCGCCGAAGCTATCGTTGCCGGTACAGGCGCTCCTTGAATAACCCCCTCCCCCCCACGCTATTCTTCAAATTCCGATTTCAGCTTCTCTTTGTTTTTCCTGGCTTGGCACCTCGGAAAAACCTCCACGTGTTAGGTTATTCCGCCGATTCCACGGGTGGGGTGCTACCAAGACTCCTGCCTAAACTGAGGGTCGC
GCGAGGCGACTATAGCTTCTTAGCCGCCGAAGCTATCGTTGCCGGTACAGGCGCTCCTTGAATAACCCCCTCCCCCCCACGCTATTCTTCAAATTCCGATTTCAGCTTCTCTTTGTTTTTCCTCCATTGGCACCTCGGAAAAACCTCCACGTGTTAGGTTATTCCGCCGATTCCACGGGTGGGGTGCTACCAAGACTCCTGCCTAAACTGAGGGTCGC
GCGAGGCGACTATAGCTTCTTAGCCGCCGAAGCTATCGTTGCCGGTACAGGCGCTCCTTGAATAACCCCCTCCCCCCCACGCTATTCTTCAAATTCCGATTTCAGCTTCTCTTTGTTTTTCCTAAGTTGGCACCTCGGAAAAACCTCCACGTGTTAGGTTATTCCGCCGATTCCACGGGTGGGGTGCTACCAAGACTCCTGCCTAAACTGAGGGTCGC
GCGAGGCGACTATAGCTTCTTAGCCGCCGAAGCTATCGTTGCCGGTACAGGCGCTCCTTGAATAACCCCCTCCCCCCCACGCTATTCTTCAAATTCCGATTTCAGCTTCTCTTTGTTTTTCCTTCACTGGCACCTCGGAAAAACCTCCACGTGTTAGGTTATTCCGCCGATTCCACGGGTGGGGTGCTACCAAGACTCCTGCCTAAACTGAGGGTCGC
GCGAGGCGACTATAGCTTCTTAGCCGCCGAAGCTATCGTTGCCGGTACAGGCGCTCCTTGAATAACCCCCTCCCCCCCACGCTATTCTTCAAATTCCGATTTCAGCTTCTCTTTGTTTTTCCTTGGATGGCACCTCGGAAAAACCTCCACGTGTTAGGTTATTCCGCCGATTCCACGGGTGGGGTGCTACCAAGACTCCTGCCTAAACTGAGGGTCGC
GCGAGGCGACTATAGCTTCTTAGCCGCCGAAGCTATCGTTGCCGGTACAGGCGCTCCTTGAATAACCCCCTCCCCCCCACGCTATTCTTCAAATTCCGATTTCAGCTTCTCTTTGTTTTTCCTTACGTGGCACCTCGGAAAAACCTCCACGTGTTAGGTTATTCCGCCGATTCCACGGGTGGGGTGCTACCAAGACTCCTGCCTAAACTGAGGGTCGC
GCGAGGCGACTATAGCTTCTTAGCCGCCGAAGCTATCGTTGCCGGTACAGGCGCTCCTTGAATAACCCCCTCCCCCCCACGCTATTCTTCAAATTCCGATTTCAGCTTCTCTTTGTTTTTCCTTTGGCGGCACCTCGGAAAAACCTCCACGTGTTAGGTTATTCCGCCGATTCCACGGGTGGGGTGCTACCAAGACTCCTGCCTAAACTGAGGGTCGC
GCGAGGCGACTATAGCTTCTTAGCCGCCGAAGCTATCGTTGCCGGTACAGGCGCTCCTTGAATAACCCCCTCCCCCCCACGCTATTCTTCAAATTCCGATTTCAGCTTCTCTTTGTTTTTCCTTTAAAGGCACCTCGGAAAAACCTCCACGTGTTAGGTTATTCCGCCGATTCCACGGGTGGGGTGCTACCAAGACTCCTGCCTAAACTGAGGGTCGC
GCGAGGCGACTATAGCTTCTTAGCCGCCGAAGCTATCGTTGCCGGTACAGGCGCTCCTTGAATAACCCCCTCCCCCCCACGCTATTCTTCAAATTCCGATTTCAGCTTCTCTTTGTTTTTCCTTTCCGGGCACCTCGGAAAAACCTCCACGTGTTAGGTTATTCCGCCGATTCCACGGGTGGGGTGCTACCAAGACTCCTGCCTAAACTGAGGGTCGC
GCGAGGCGACTATAGCTTCTTAGCCGCCGAAGCTATCGTTGCCGGTACAGGCGCTCCTTGAATAACCCCCTCCCCCCCACGCTATTCTTCAAATTCCGATTTCAGCTTCTCTTTGTTTTTCCTTTTCGCGCACCTCGGAAAAACCTCCACGTGTTAGGTTATTCCGCCGATTCCACGGGTGGGGTGCTACCAAGACTCCTGCCTAAACTGAGGGTCGC
GCGAGGCGACTATAGCTTCTTAGCCGCCGAAGCTATCGTTGCCGGTACAGGCGCTCCTTGAATAACCCCCTCCCCCCCACGCTATTCTTCAAATTCCGATTTCAGCTTCTCTTTGTTTTTCCTTTTAAAGCACCTCGGAAAAACCTCCACGTGTTAGGTTATTCCGCCGATTCCACGGGTGGGGTGCTACCAAGACTCCTGCCTAAACTGAGGGTCGC
GCGAGGCGACTATAGCTTCTTAGCCGCCGAAGCTATCGTTGCCGGTACAGGCGCTCCTTGAATAACCCCCTCCCCCCCACGCTATTCTTCAAATTCCGATTTCAGCTTCTCTTTGTTTTTCCTTTTGCTGCACCTCGGAAAAACCTCCACGTGTTAGGTTATTCCGCCGATTCCACGGGTGGGGTGCTACCAAGACTCCTGCCTAAACTGAGGGTCGC
GCGAGGCGACTATAGCTTCTTAGCCGCCGAAGCTATCGTTGCCGGTACAGGCGCTCCTTGAATAACCCCCTCCCCCCCACGCTATTCTTCAAATTCCGATTTCAGCTTCTCTTTGTTTTTCCTTTTTGAACACCTCGGAAAAACCTCCACGTGTTAGGTTATTCCGCCGATTCCACGGGTGGGGTGCTACCAAGACTCCTGCCTAAACTGAGGGTCGC
GCGAGGCGACTATAGCTTCTTAGCCGCCGAAGCTATCGTTGCCGGTACAGGCGCTCCTTGAATAACCCCCTCCCCCCCACGCTATTCTTCAAATTCCGATTTCAGCTTCTCTTTGTTTTTCCTTTTTACTCACCTCGGAAAAACCTCCACGTGTTAGGTTATTCCGCCGATTCCACGGGTGGGGTGCTACCAAGACTCCTGCCTAAACTGAGGGTCGC
GCGAGGCGACTATAGCTTCTTAGCCGCCGAAGCTATCGTTGCCGGTACAGGCGCTCCTTGAATAACCCCCTCCCCCCCACGCTATTCTTCAAATTCCGATTTCAGCTTCTCTTTGTTTTTCCTTTTTCTCCACCTCGGAAAAACCTCCACGTGTTAGGTTATTCCGCCGATTCCACGGGTGGGGTGCTACCAAGACTCCTGCCTAAACTGAGGGTCGC
GCGAGGCGACTATAGCTTCTTAGCCGCCGAAGCTATCGTTGCCGGTACAGGCGCTCCTTGAATAACCCCCTCCCCCCCACGCTATTCTTCAAATTCCGATTTCAGCTTCTCTTTGTTTTTCCTTTTTTATTACCTCGGAAAAACCTCCACGTGTTAGGTTATTCCGCCGATTCCACGGGTGGGGTGCTACCAAGACTCCTGCCTAAACTGAGGGTCGC
GCGAGGCGACTATAGCTTCTTAGCCGCCGAAGCTATCGTTGCCGGTACAGGCGCTCCTTGAATAACCCCCTCCCCCCCACGCTATTCTTCAAATTCCGATTTCAGCTTCTCTTTGTTTTTCCTTTTTTCAAACCTCGGAAAAACCTCCACGTGTTAGGTTATTCCGCCGATTCCACGGGTGGGGTGCTACCAAGACTCCTGCCTAAACTGAGGGTCGC
GCGAGGCGACTATAGCTTCTTAGCCGCCGAAGCTATCGTTGCCGGTACAGGCGCTCCTTGAATAACCCCCTCCCCCCCACGCTATTCTTCAAATTCCGATTTCAGCTTCTCTTTGTTTTTCCTTTTTTTCGACCTCGGAAAAACCTCCACGTGTTAGGTTATTCCGCCGATTCCACGGGTGGGGTGCTACCAAGACTCCTGCCTAAACTGAGGGTCGC
GCGAGGCGACTATAGCTTCTTAGCCGCCGAAGCTATCGTTGCCGGTACAGGCGCTCCTTGAATAACCCCCTCCCCCCCACGCTATTCTTCAAATTCCGATTTCAGCTTCTCTTTGTTTTTCCTTTTTTGCTTCCTCGGAAAAACCTCCACGTGTTAGGTTATTCCGCCGATTCCACGGGTGGGGTGCTACCAAGACTCCTGCCTAAACTGAGGGTCGC
GCGAGGCGACTATAGCTTCTTAGCCGCCGAAGCTATCGTTGCCGGTACAGGCGCTCCTTGAATAACCCCCTCCCCCCCACGCTATTCTTCAAATTCCGATTTCAGCTTCTCTTTGTTTTTCCTTTTTTGTAGCCTCGGAAAAACCTCCACGTGTTAGGTTATTCCGCCGATTCCACGGGTGGGGTGCTACCAAGACTCCTGCCTAAACTGAGGGTCGC
GCGAGGCGACTATAGCTTCTTAGCCGCCGAAGCTATCGTTGCCGGTACAGGCGCTCCTTGAATAACCCCCTCCCCCCCACGCTATTCTTCAAATTCCGATTTCAGCTTCTCTTTGTTTTTCCTTTTTTGAGCCCTCGGAAAAACCTCCACGTGTTAGGTTATTCCGCCGATTCCACGGGTGGGGTGCTACCAAGACTCCTGCCTAAACTGAGGGTCGC
GCGAGGCGACTATAGCTTCTTAGCCGCCGAAGCTATCGTTGCCGGTACAGGCGCTCCTTGAATAACCCCCTCCCCCCCACGCTATTCTTCAAATTCCGATTTCAGCTTCTCTTTGTTTTTCCTTTTTTGGTCTCTCGGAAAAACCTCCACGTGTTAGGTTATTCCGCCGATTCCACGGGTGGGGTGCTACCAAGACTCCTGCCTAAACTGAGGGTCGC
GCGAGGCGACTATAGCTTCTTAGCCGCCGAAGCTATCGTTGCCGGTACAGGCGCTCCTTGAATAACCCCCTCCCCCCCACGCTATTCTTCAAATTCCGATTTCAGCTTCTCTTTGTTTTTCCTTTTTTGGGTGCTCGGAAAAACCTCCACGTGTTAGGTTATTCCGCCGATTCCACGGGTGGGGTGCTACCAAGACTCCTGCCTAAACTGAGGGTCGC
GCGAGGCGACTATAGCTTCTTAGCCGCCGAAGCTATCGTTGCCGGTACAGGCGCTCCTTGAATAACCCCCTCCCCCCCACGCTATTCTTCAAATTCCGATTTCAGCTTCTCTTTGTTTTTCCTTTTTTGGAGACTCGGAAAAACCTCCACGTGTTAGGTTATTCCGCCGATTCCACGGGTGGGGTGCTACCAAGACTCCTGCCTAAACTGAGGGTCGC
GCGAGGCGACTATAGCTTCTTAGCCGCCGAAGCTATCGTTGCCGGTACAGGCGCTCCTTGAATAACCCCCTCCCCCCCACGCTATTCTTCAAATTCCGATTTCAGCTTCTCTTTGTTTTTCCTTTTTTGGCCAATCGGAAAAACCTCCACGTGTTAGGTTATTCCGCCGATTCCACGGGTGGGGTGCTACCAAGACTCCTGCCTAAACTGAGGGTCGC
GCGAGGCGACTATAGCTTCTTAGCCGCCGAAGCTATCGTTGCCGGTACAGGCGCTCCTTGAATAACCCCCTCCCCCCCACGCTATTCTTCAAATTCCGATTTCAGCTTCTCTTTGTTTTTCCTTTTTTGGCGGGTCGGAAAAACCTCCACGTGTTAGGTTATTCCGCCGATTCCACGGGTGGGGTGCTACCAAGACTCCTGCCTAAACTGAGGGTCGC
GCGAGGCGACTATAGCTTCTTAGCCGCCGAAGCTATCGTTGCCGGTACAGGCGCTCCTTGAATAACCCCCTCCCCCCCACGCTATTCTTCAAATTCCGATTTCAGCTTCTCTTTGTTTTTCCTTTTTTGGCTTTTCGGAAAAACCTCCACGTGTTAGGTTATTCCGCCGATTCCACGGGTGGGGTGCTACCAAGACTCCTGCCTAAACTGAGGGTCGC
GCGAGGCGACTATAGCTTCTTAGCCGCCGAAGCTATCGTTGCCGGTACAGGCGCTCCTTGAATAACCCCCTCCCCCCCACGCTATTCTTCAAATTCCGATTTCAGCTTCTCTTTGTTTTTCCTTTTTTGGCATTCCGGAAAAACCTCCACGTGTTAGGTTATTCCGCCGATTCCACGGGTGGGGTGCTACCAAGACTCCTGCCTAAACTGAGGGTCGC
GCGAGGCGACTATAGCTTCTTAGCCGCCGAAGCTATCGTTGCCGGTACAGGCGCTCCTTGAATAACCCCCTCCCCCCCACGCTATTCTTCAAATTCCGATTTCAGCTTCTCTTTGTTTTTCCTTTTTTGGCAAGACGGAAAAACCTCCACGTGTTAGGTTATTCCGCCGATTCCACGGGTGGGGTGCTACCAAGACTCCTGCCTAAACTGAGGGTCGC
GCGAGGCGACTATAGCTTCTTAGCCGCCGAAGCTATCGTTGCCGGTACAGGCGCTCCTTGAATAACCCCCTCCCCCCCACGCTATTCTTCAAATTCCGATTTCAGCTTCTCTTTGTTTTTCCTTTTTTGGCAGAGCGGAAAAACCTCCACGTGTTAGGTTATTCCGCCGATTCCACGGGTGGGGTGCTACCAAGACTCCTGCCTAAACTGAGGGTCGC
GCGAGGCGACTATAGCTTCTTAGCCGCCGAAGCTATCGTTGCCGGTACAGGCGCTCCTTGAATAACCCCCTCCCCCCCACGCTATTCTTCAAATTCCGATTTCAGCTTCTCTTTGTTTTTCCTTTTTTGGCACTAAGGAAAAACCTCCACGTGTTAGGTTATTCCGCCGATTCCACGGGTGGGGTGCTACCAAGACTCCTGCCTAAACTGAGGGTCGC
GCGAGGCGACTATAGCTTCTTAGCCGCCGAAGCTATCGTTGCCGGTACAGGCGCTCCTTGAATAACCCCCTCCCCCCCACGCTATTCTTCAAATTCCGATTTCAGCTTCTCTTTGTTTTTCCTTTTTTGGCACGGGGGAAAAACCTCCACGTGTTAGGTTATTCCGCCGATTCCACGGGTGGGGTGCTACCAAGACTCCTGCCTAAACTGAGGGTCGC
GCGAGGCGACTATAGCTTCTTAGCCGCCGAAGCTATCGTTGCCGGTACAGGCGCTCCTTGAATAACCCCCTCCCCCCCACGCTATTCTTCAAATTCCGATTTCAGCTTCTCTTTGTTTTTCCTTTTTTGGCACACTGGAAAAACCTCCACGTGTTAGGTTATTCCGCCGATTCCACGGGTGGGGTGCTACCAAGACTCCTGCCTAAACTGAGGGTCGC
GCGAGGCGACTATAGCTTCTTAGCCGCCGAAGCTATCGTTGCCGGTACAGGCGCTCCTTGAATAACCCCCTCCCCCCCACGCTATTCTTCAAATTCCGATTTCAGCTTCTCTTTGTTTTTCCTTTTTTGGCACCCGCGAAAAACCTCCACGTGTTAGGTTATTCCGCCGATTCCACGGGTGGGGTGCTACCAAGACTCCTGCCTAAACTGAGGGTCGC
GCGAGGCGACTATAGCTTCTTAGCCGCCGAAGCTATCGTTGCCGGTACAGGCGCTCCTTGAATAACCCCCTCCCCCCCACGCTATTCTTCAAATTCCGATTTCAGCTTCTCTTTGTTTTTCCTTTTTTGGCACCATTGAAAAACCTCCACGTGTTAGGTTATTCCGCCGATTCCACGGGTGGGGTGCTACCAAGACTCCTGCCTAAACTGAGGGTCGC
GCGAGGCGACTATAGCTTCTTAGCCGCCGAAGCTATCGTTGCCGGTACAGGCGCTCCTTGAATAACCCCCTCCCCCCCACGCTATTCTTCAAATTCCGATTTCAGCTTCTCTTTGTTTTTCCTTTTTTGGCACCGAAGAAAAACCTCCACGTGTTAGGTTATTCCGCCGATTCCACGGGTGGGGTGCTACCAAGACTCCTGCCTAAACTGAGGGTCGC
GCGAGGCGACTATAGCTTCTTAGCCGCCGAAGCTATCGTTGCCGGTACAGGCGCTCCTTGAATAACCCCCTCCCCCCCACGCTATTCTTCAAATTCCGATTTCAGCTTCTCTTTGTTTTTCCTTTTTTGGCACCTAACAAAAACCTCCACGTGTTAGGTTATTCCGCCGATTCCACGGGTGGGGTGCTACCAAGACTCCTGCCTAAACTGAGGGTCGC
GCGAGGCGACTATAGCTTCTTAGCCGCCGAAGCTATCGTTGCCGGTACAGGCGCTCCTTGAATAACCCCCTCCCCCCCACGCTATTCTTCAAATTCCGATTTCAGCTTCTCTTTGTTTTTCCTTTTTTGGCACCTTCAAAAAACCTCCACGTGTTAGGTTATTCCGCCGATTCCACGGGTGGGGTGCTACCAAGACTCCTGCCTAAACTGAGGGTCGC
GCGAGGCGACTATAGCTTCTTAGCCGCCGAAGCTATCGTTGCCGGTACAGGCGCTCCTTGAATAACCCCCTCCCCCCCACGCTATTCTTCAAATTCCGATTTCAGCTTCTCTTTGTTTTTCCTTTTTTGGCACCTGTTAAAAACCTCCACGTGTTAGGTTATTCCGCCGATTCCACGGGTGGGGTGCTACCAAGACTCCTGCCTAAACTGAGGGTCGC
GCGAGGCGACTATAGCTTCTTAGCCGCCGAAGCTATCGTTGCCGGTACAGGCGCTCCTTGAATAACCCCCTCCCCCCCACGCTATTCTTCAAATTCCGATTTCAGCTTCTCTTTGTTTTTCCTTTTTTGGCACCTCTATAAAACCTCCACGTGTTAGGTTATTCCGCCGATTCCACGGGTGGGGTGCTACCAAGACTCCTGCCTAAACTGAGGGTCGC
GCGAGGCGACTATAGCTTCTTAGCCGCCGAAGCTATCGTTGCCGGTACAGGCGCTCCTTGAATAACCCCCTCCCCCCCACGCTATTCTTCAAATTCCGATTTCAGCTTCTCTTTGTTTTTCCTTTTTTGGCACCTCCCCAAAACCTCCACGTGTTAGGTTATTCCGCCGATTCCACGGGTGGGGTGCTACCAAGACTCCTGCCTAAACTGAGGGTCGC
GCGAGGCGACTATAGCTTCTTAGCCGCCGAAGCTATCGTTGCCGGTACAGGCGCTCCTTGAATAACCCCCTCCCCCCCACGCTATTCTTCAAATTCCGATTTCAGCTTCTCTTTGTTTTTCCTTTTTTGGCACCTCATGAAAACCTCCACGTGTTAGGTTATTCCGCCGATTCCACGGGTGGGGTGCTACCAAGACTCCTGCCTAAACTGAGGGTCGC
GCGAGGCGACTATAGCTTCTTAGCCGCCGAAGCTATCGTTGCCGGTACAGGCGCTCCTTGAATAACCCCCTCCCCCCCACGCTATTCTTCAAATTCCGATTTCAGCTTCTCTTTGTTTTTCCTTTTTTGGCACCTCGTGTAAACCTCCACGTGTTAGGTTATTCCGCCGATTCCACGGGTGGGGTGCTACCAAGACTCCTGCCTAAACTGAGGGTCGC
GCGAGGCGACTATAGCTTCTTAGCCGCCGAAGCTATCGTTGCCGGTACAGGCGCTCCTTGAATAACCCCCTCCCCCCCACGCTATTCTTCAAATTCCGATTTCAGCTTCTCTTTGTTTTTCCTTTTTTGGCACCTCGACGAAACCTCCACGTGTTAGGTTATTCCGCCGATTCCACGGGTGGGGTGCTACCAAGACTCCTGCCTAAACTGAGGGTCGC
GCGAGGCGACTATAGCTTCTTAGCCGCCGAAGCTATCGTTGCCGGTACAGGCGCTCCTTGAATAACCCCCTCCCCCCCACGCTATTCTTCAAATTCCGATTTCAGCTTCTCTTTGTTTTTCCTTTTTTGGCACCTCGCTCAAACCTCCACGTGTTAGGTTATTCCGCCGATTCCACGGGTGGGGTGCTACCAAGACTCCTGCCTAAACTGAGGGTCGC
GCGAGGCGACTATAGCTTCTTAGCCGCCGAAGCTATCGTTGCCGGTACAGGCGCTCCTTGAATAACCCCCTCCCCCCCACGCTATTCTTCAAATTCCGATTTCAGCTTCTCTTTGTTTTTCCTTTTTTGGCACCTCGGCTGAACCTCCACGTGTTAGGTTATTCCGCCGATTCCACGGGTGGGGTGCTACCAAGACTCCTGCCTAAACTGAGGGTCGC
GCGAGGCGACTATAGCTTCTTAGCCGCCGAAGCTATCGTTGCCGGTACAGGCGCTCCTTGAATAACCCCCTCCCCCCCACGCTATTCTTCAAATTCCGATTTCAGCTTCTCTTTGTTTTTCCTTTTTTGGCACCTCGGTGTAACCTCCACGTGTTAGGTTATTCCGCCGATTCCACGGGTGGGGTGCTACCAAGACTCCTGCCTAAACTGAGGGTCGC
GCGAGGCGACTATAGCTTCTTAGCCGCCGAAGCTATCGTTGCCGGTACAGGCGCTCCTTGAATAACCCCCTCCCCCCCACGCTATTCTTCAAATTCCGATTTCAGCTTCTCTTTGTTTTTCCTTTTTTGGCACCTCGGGCCAACCTCCACGTGTTAGGTTATTCCGCCGATTCCACGGGTGGGGTGCTACCAAGACTCCTGCCTAAACTGAGGGTCGC
GCGAGGCGACTATAGCTTCTTAGCCGCCGAAGCTATCGTTGCCGGTACAGGCGCTCCTTGAATAACCCCCTCCCCCCCACGCTATTCTTCAAATTCCGATTTCAGCTTCTCTTTGTTTTTCCTTTTTTGGCACCTCGGAGGCACCTCCACGTGTTAGGTTATTCCGCCGATTCCACGGGTGGGGTGCTACCAAGACTCCTGCCTAAACTGAGGGTCGC
GCGAGGCGACTATAGCTTCTTAGCCGCCGAAGCTATCGTTGCCGGTACAGGCGCTCCTTGAATAACCCCCTCCCCCCCACGCTATTCTTCAAATTCCGATTTCAGCTTCTCTTTGTTTTTCCTTTTTTGGCACCTCGGATTGACCTCCACGTGTTAGGTTATTCCGCCGATTCCACGGGTGGGGTGCTACCAAGACTCCTGCCTAAACTGAGGGTCGC
GCGAGGCGACTATAGCTTCTTAGCCGCCGAAGCTATCGTTGCCGGTACAGGCGCTCCTTGAATAACCCCCTCCCCCCCACGCTATTCTTCAAATTCCGATTTCAGCTTCTCTTTGTTTTTCCTTTTTTGGCACCTCGGACCTACCTCCACGTGTTAGGTTATTCCGCCGATTCCACGGGTGGGGTGCTACCAAGACTCCTGCCTAAACTGAGGGTCGC
GCGAGGCGACTATAGCTTCTTAGCCGCCGAAGCTATCGTTGCCGGTACAGGCGCTCCTTGAATAACCCCCTCCCCCCCACGCTATTCTTCAAATTCCGATTTCAGCTTCTCTTTGTTTTTCCTTTTTTGGCACCTCGGAAGGTCCTCCACGTGTTAGGTTATTCCGCCGATTCCACGGGTGGGGTGCTACCAAGACTCCTGCCTAAACTGAGGGTCGC
GCGAGGCGACTATAGCTTCTTAGCCGCCGAAGCTATCGTTGCCGGTACAGGCGCTCCTTGAATAACCCCCTCCCCCCCACGCTATTCTTCAAATTCCGATTTCAGCTTCTCTTTGTTTTTCCTTTTTTGGCACCTCGGAATTCCCTCCACGTGTTAGGTTATTCCGCCGATTCCACGGGTGGGGTGCTACCAAGACTCCTGCCTAAACTGAGGGTCGC
GCGAGGCGACTATAGCTTCTTAGCCGCCGAAGCTATCGTTGCCGGTACAGGCGCTCCTTGAATAACCCCCTCCCCCCCACGCTATTCTTCAAATTCCGATTTCAGCTTCTCTTTGTTTTTCCTTTTTTGGCACCTCGGAACCGCCTCCACGTGTTAGGTTATTCCGCCGATTCCACGGGTGGGGTGCTACCAAGACTCCTGCCTAAACTGAGGGTCGC
GCGAGGCGACTATAGCTTCTTAGCCGCCGAAGCTATCGTTGCCGGTACAGGCGCTCCTTGAATAACCCCCTCCCCCCCACGCTATTCTTCAAATTCCGATTTCAGCTTCTCTTTGTTTTTCCTTTTTTGGCACCTCGGAAATCTCTCCACGTGTTAGGTTATTCCGCCGATTCCACGGGTGGGGTGCTACCAAGACTCCTGCCTAAACTGAGGGTCGC
GCGAGGCGACTATAGCTTCTTAGCCGCCGAAGCTATCGTTGCCGGTACAGGCGCTCCTTGAATAACCCCCTCCCCCCCACGCTATTCTTCAAATTCCGATTTCAGCTTCTCTTTGTTTTTCCTTTTTTGGCACCTCGGAAAGTACTCCACGTGTTAGGTTATTCCGCCGATTCCACGGGTGGGGTGCTACCAAGACTCCTGCCTAAACTGAGGGTCGC
GCGAGGCGACTATAGCTTCTTAGCCGCCGAAGCTATCGTTGCCGGTACAGGCGCTCCTTGAATAACCCCCTCCCCCCCACGCTATTCTTCAAATTCCGATTTCAGCTTCTCTTTGTTTTTCCTTTTTTGGCACCTCGGAAACGGCTCCACGTGTTAGGTTATTCCGCCGATTCCACGGGTGGGGTGCTACCAAGACTCCTGCCTAAACTGAGGGTCGC
GCGAGGCGACTATAGCTTCTTAGCCGCCGAAGCTATCGTTGCCGGTACAGGCGCTCCTTGAATAACCCCCTCCCCCCCACGCTATTCTTCAAATTCCGATTTCAGCTTCTCTTTGTTTTTCCTTTTTTGGCACCTCGGAAAAGGTTCCACGTGTTAGGTTATTCCGCCGATTCCACGGGTGGGGTGCTACCAAGACTCCTGCCTAAACTGAGGGTCGC
GCGAGGCGACTATAGCTTCTTAGCCGCCGAAGCTATCGTTGCCGGTACAGGCGCTCCTTGAATAACCCCCTCCCCCCCACGCTATTCTTCAAATTCCGATTTCAGCTTCTCTTTGTTTTTCCTTTTTTGGCACCTCGGAAAATAATCCACGTGTTAGGTTATTCCGCCGATTCCACGGGTGGGGTGCTACCAAGACTCCTGCCTAAACTGAGGGTCGC
GCGAGGCGACTATAGCTTCTTAGCCGCCGAAGCTATCGTTGCCGGTACAGGCGCTCCTTGAATAACCCCCTCCCCCCCACGCTATTCTTCAAATTCCGATTTCAGCTTCTCTTTGTTTTTCCTTTTTTGGCACCTCGGAAAACTGTCCACGTGTTAGGTTATTCCGCCGATTCCACGGGTGGGGTGCTACCAAGACTCCTGCCTAAACTGAGGGTCGC
GCGAGGCGACTATAGCTTCTTAGCCGCCGAAGCTATCGTTGCCGGTACAGGCGCTCCTTGAATAACCCCCTCCCCCCCACGCTATTCTTCAAATTCCGATTTCAGCTTCTCTTTGTTTTTCCTTTTTTGGCACCTCGGAAAAAGAGCCACGTGTTAGGTTATTCCGCCGATTCCACGGGTGGGGTGCTACCAAGACTCCTGCCTAAACTGAGGGTCGC
GCGAGGCGACTATAGCTTCTTAGCCGCCGAAGCTATCGTTGCCGGTACAGGCGCTCCTTGAATAACCCCCTCCCCCCCACGCTATTCTTCAAATTCCGATTTCAGCTTCTCTTTGTTTTTCCTTTTTTGGCACCTCGGAAAAATTCCCACGTGTTAGGTTATTCCGCCGATTCCACGGGTGGGGTGCTACCAAGACTCCTGCCTAAACTGAGGGTCGC
GCGAGGCGACTATAGCTTCTTAGCCGCCGAAGCTATCGTTGCCGGTACAGGCGCTCCTTGAATAACCCCCTCCCCCCCACGCTATTCTTCAAATTCCGATTTCAGCTTCTCTTTGTTTTTCCTTTTTTGGCACCTCGGAAAAAAGACCACGTGTTAGGTTATTCCGCCGATTCCACGGGTGGGGTGCTACCAAGACTCCTGCCTAAACTGAGGGTCGC
GCGAGGCGACTATAGCTTCTTAGCCGCCGAAGCTATCGTTGCCGGTACAGGCGCTCCTTGAATAACCCCCTCCCCCCCACGCTATTCTTCAAATTCCGATTTCAGCTTCTCTTTGTTTTTCCTTTTTTGGCACCTCGGAAAAACAAGCACGTGTTAGGTTATTCCGCCGATTCCACGGGTGGGGTGCTACCAAGACTCCTGCCTAAACTGAGGGTCGC
GCGAGGCGACTATAGCTTCTTAGCCGCCGAAGCTATCGTTGCCGGTACAGGCGCTCCTTGAATAACCCCCTCCCCCCCACGCTATTCTTCAAATTCCGATTTCAGCTTCTCTTTGTTTTTCCTTTTTTGGCACCTCGGAAAAACTCTCACGTGTTAGGTTATTCCGCCGATTCCACGGGTGGGGTGCTACCAAGACTCCTGCCTAAACTGAGGGTCGC
GCGAGGCGACTATAGCTTCTTAGCCGCCGAAGCTATCGTTGCCGGTACAGGCGCTCCTTGAATAACCCCCTCCCCCCCACGCTATTCTTCAAATTCCGATTTCAGCTTCTCTTTGTTTTTCCTTTTTTGGCACCTCGGAAAAACGGACACGTGTTAGGTTATTCCGCCGATTCCACGGGTGGGGTGCTACCAAGACTCCTGCCTAAACTGAGGGTCGC
GCGAGGCGACTATAGCTTCTTAGCCGCCGAAGCTATCGTTGCCGGTACAGGCGCTCCTTGAATAACCCCCTCCCCCCCACGCTATTCTTCAAATTCCGATTTCAGCTTCTCTTTGTTTTTCCTTTTTTGGCACCTCGGAAAAACCAAGACGTGTTAGGTTATTCCGCCGATTCCACGGGTGGGGTGCTACCAAGACTCCTGCCTAAACTGAGGGTCGC
GCGAGGCGACTATAGCTTCTTAGCCGCCGAAGCTATCGTTGCCGGTACAGGCGCTCCTTGAATAACCCCCTCCCCCCCACGCTATTCTTCAAATTCCGATTTCAGCTTCTCTTTGTTTTTCCTTTTTTGGCACCTCGGAAAAACCCTTACGTGTTAGGTTATTCCGCCGATTCCACGGGTGGGGTGCTACCAAGACTCCTGCCTAAACTGAGGGTCGC
GCGAGGCGACTATAGCTTCTTAGCCGCCGAAGCTATCGTTGCCGGTACAGGCGCTCCTTGAATAACCCCCTCCCCCCCACGCTATTCTTCAAATTCCGATTTCAGCTTCTCTTTGTTTTTCCTTTTTTGGCACCTCGGAAAAACCGGAACGTGTTAGGTTATTCCGCCGATTCCACGGGTGGGGTGCTACCAAGACTCCTGCCTAAACTGAGGGTCGC
GCGAGGCGACTATAGCTTCTTAGCCGCCGAAGCTATCGTTGCCGGTACAGGCGCTCCTTGAATAACCCCCTCCCCCCCACGCTATTCTTCAAATTCCGATTTCAGCTTCTCTTTGTTTTTCCTTTTTTGGCACCTCGGAAAAACCTGTGCGTGTTAGGTTATTCCGCCGATTCCACGGGTGGGGTGCTACCAAGACTCCTGCCTAAACTGAGGGTCGC
GCGAGGCGACTATAGCTTCTTAGCCGCCGAAGCTATCGTTGCCGGTACAGGCGCTCCTTGAATAACCCCCTCCCCCCCACGCTATTCTTCAAATTCCGATTTCAGCTTCTCTTTGTTTTTCCTTTTTTGGCACCTCGGAAAAACCTAGTCGTGTTAGGTTATTCCGCCGATTCCACGGGTGGGGTGCTACCAAGACTCCTGCCTAAACTGAGGGTCGC
GCGAGGCGACTATAGCTTCTTAGCCGCCGAAGCTATCGTTGCCGGTACAGGCGCTCCTTGAATAACCCCCTCCCCCCCACGCTATTCTTCAAATTCCGATTTCAGCTTCTCTTTGTTTTTCCTTTTTTGGCACCTCGGAAAAACCTTACCGTGTTAGGTTATTCCGCCGATTCCACGGGTGGGGTGCTACCAAGACTCCTGCCTAAACTGAGGGTCGC
GCGAGGCGACTATAGCTTCTTAGCCGCCGAAGCTATCGTTGCCGGTACAGGCGCTCCTTGAATAACCCCCTCCCCCCCACGCTATTCTTCAAATTCCGATTTCAGCTTCTCTTTGTTTTTCCTTTTTTGGCACCTCGGAAAAACCTCAGTGTGTTAGGTTATTCCGCCGATTCCACGGGTGGGGTGCTACCAAGACTCCTGCCTAAACTGAGGGTCGC
GCGAGGCGACTATAGCTTCTTAGCCGCCGAAGCTATCGTTGCCGGTACAGGCGCTCCTTGAATAACCCCCTCCCCCCCACGCTATTCTTCAAATTCCGATTTCAGCTTCTCTTTGTTTTTCCTTTTTTGGCACCTCGGAAAAACCTCGTGGTGTTAGGTTATTCCGCCGATTCCACGGGTGGGGTGCTACCAAGACTCCTGCCTAAACTGAGGGTCGC
GCGAGGCGACTATAGCTTCTTAGCCGCCGAAGCTATCGTTGCCGGTACAGGCGCTCCTTGAATAACCCCCTCCCCCCCACGCTATTCTTCAAATTCCGATTTCAGCTTCTCTTTGTTTTTCCTTTTTTGGCACCTCGGAAAAACCTCTCAGTGTTAGGTTATTCCGCCGATTCCACGGGTGGGGTGCTACCAAGACTCCTGCCTAAACTGAGGGTCGC
GCGAGGCGACTATAGCTTCTTAGCCGCCGAAGCTATCGTTGCCGGTACAGGCGCTCCTTGAATAACCCCCTCCCCCCCACGCTATTCTTCAAATTCCGATTTCAGCTTCTCTTTGTTTTTCCTTTTTTGGCACCTCGGAAAAACCTCCGGATGTTAGGTTATTCCGCCGATTCCACGGGTGGGGTGCTACCAAGACTCCTGCCTAAACTGAGGGTCGC
GCGAGGCGACTATAGCTTCTTAGCCGCCGAAGCTATCGTTGCCGGTACAGGCGCTCCTTGAATAACCCCCTCCCCCCCACGCTATTCTTCAAATTCCGATTTCAGCTTCTCTTTGTTTTTCCTTTTTTGGCACCTCGGAAAAACCTCCCACTGTTAGGTTATTCCGCCGATTCCACGGGTGGGGTGCTACCAAGACTCCTGCCTAAACTGAGGGTCGC
GCGAGGCGACTATAGCTTCTTAGCCGCCGAAGCTATCGTTGCCGGTACAGGCGCTCCTTGAATAACCCCCTCCCCCCCACGCTATTCTTCAAATTCCGATTTCAGCTTCTCTTTGTTTTTCCTTTTTTGGCACCTCGGAAAAACCTCCTTTTGTTAGGTTATTCCGCCGATTCCACGGGTGGGGTGCTACCAAGACTCCTGCCTAAACTGAGGGTCGC
GCGAGGCGACTATAGCTTCTTAGCCGCCGAAGCTATCGTTGCCGGTACAGGCGCTCCTTGAATAACCCCCTCCCCCCCACGCTATTCTTCAAATTCCGATTTCAGCTTCTCTTTGTTTTTCCTTTTTTGGCACCTCGGAAAAACCTCCAGACGTTAGGTTATTCCGCCGATTCCACGGGTGGGGTGCTACCAAGACTCCTGCCTAAACTGAGGGTCGC
GCGAGGCGACTATAGCTTCTTAGCCGCCGAAGCTATCGTTGCCGGTACAGGCGCTCCTTGAATAACCCCCTCCCCCCCACGCTATTCTTCAAATTCCGATTTCAGCTTCTCTTTGTTTTTCCTTTTTTGGCACCTCGGAAAAACCTCCATCAGTTAGGTTATTCCGCCGATTCCACGGGTGGGGTGCTACCAAGACTCCTGCCTAAACTGAGGGTCGC
GCGAGGCGACTATAGCTTCTTAGCCGCCGAAGCTATCGTTGCCGGTACAGGCGCTCCTTGAATAACCCCCTCCCCCCCACGCTATTCTTCAAATTCCGATTTCAGCTTCTCTTTGTTTTTCCTTTTTTGGCACCTCGGAAAAACCTCCAATGGTTAGGTTATTCCGCCGATTCCACGGGTGGGGTGCTACCAAGACTCCTGCCTAAACTGAGGGTCGC
GCGAGGCGACTATAGCTTCTTAGCCGCCGAAGCTATCGTTGCCGGTACAGGCGCTCCTTGAATAACCCCCTCCCCCCCACGCTATTCTTCAAATTCCGATTTCAGCTTCTCTTTGTTTTTCCTTTTTTGGCACCTCGGAAAAACCTCCACTCTTTAGGTTATTCCGCCGATTCCACGGGTGGGGTGCTACCAAGACTCCTGCCTAAACTGAGGGTCGC
GCGAGGCGACTATAGCTTCTTAGCCGCCGAAGCTATCGTTGCCGGTACAGGCGCTCCTTGAATAACCCCCTCCCCCCCACGCTATTCTTCAAATTCCGATTTCAGCTTCTCTTTGTTTTTCCTTTTTTGGCACCTCGGAAAAACCTCCACAGATTAGGTTATTCCGCCGATTCCACGGGTGGGGTGCTACCAAGACTCCTGCCTAAACTGAGGGTCGC
GCGAGGCGACTATAGCTTCTTAGCCGCCGAAGCTATCGTTGCCGGTACAGGCGCTCCTTGAATAACCCCCTCCCCCCCACGCTATTCTTCAAATTCCGATTTCAGCTTCTCTTTGTTTTTCCTTTTTTGGCACCTCGGAAAAACCTCCACCACTTAGGTTATTCCGCCGATTCCACGGGTGGGGTGCTACCAAGACTCCTGCCTAAACTGAGGGTCGC
GCGAGGCGACTATAGCTTCTTAGCCGCCGAAGCTATCGTTGCCGGTACAGGCGCTCCTTGAATAACCCCCTCCCCCCCACGCTATTCTTCAAATTCCGATTTCAGCTTCTCTTTGTTTTTCCTTTTTTGGCACCTCGGAAAAACCTCCACGAAATAGGTTATTCCGCCGATTCCACGGGTGGGGTGCTACCAAGACTCCTGCCTAAACTGAGGGTCGC
GCGAGGCGACTATAGCTTCTTAGCCGCCGAAGCTATCGTTGCCGGTACAGGCGCTCCTTGAATAACCCCCTCCCCCCCACGCTATTCTTCAAATTCCGATTTCAGCTTCTCTTTGTTTTTCCTTTTTTGGCACCTCGGAAAAACCTCCACGGCGTAGGTTATTCCGCCGATTCCACGGGTGGGGTGCTACCAAGACTCCTGCCTAAACTGAGGGTCGC
GCGAGGCGACTATAGCTTCTTAGCCGCCGAAGCTATCGTTGCCGGTACAGGCGCTCCTTGAATAACCCCCTCCCCCCCACGCTATTCTTCAAATTCCGATTTCAGCTTCTCTTTGTTTTTCCTTTTTTGGCACCTCGGAAAAACCTCCACGCTCTAGGTTATTCCGCCGATTCCACGGGTGGGGTGCTACCAAGACTCCTGCCTAAACTGAGGGTCGC
GCGAGGCGACTATAGCTTCTTAGCCGCCGAAGCTATCGTTGCCGGTACAGGCGCTCCTTGAATAACCCCCTCCCCCCCACGCTATTCTTCAAATTCCGATTTCAGCTTCTCTTTGTTTTTCCTTTTTTGGCACCTCGGAAAAACCTCCACGTAGCAGGTTATTCCGCCGATTCCACGGGTGGGGTGCTACCAAGACTCCTGCCTAAACTGAGGGTCGC
GCGAGGCGACTATAGCTTCTTAGCCGCCGAAGCTATCGTTGCCGGTACAGGCGCTCCTTGAATAACCCCCTCCCCCCCACGCTATTCTTCAAATTCCGATTTCAGCTTCTCTTTGTTTTTCCTTTTTTGGCACCTCGGAAAAACCTCCACGTCAGAGGTTATTCCGCCGATTCCACGGGTGGGGTGCTACCAAGACTCCTGCCTAAACTGAGGGTCGC
GCGAGGCGACTATAGCTTCTTAGCCGCCGAAGCTATCGTTGCCGGTACAGGCGCTCCTTGAATAACCCCCTCCCCCCCACGCTATTCTTCAAATTCCGATTTCAGCTTCTCTTTGTTTTTCCTTTTTTGGCACCTCGGAAAAACCTCCACGTTCAAGGTTATTCCGCCGATTCCACGGGTGGGGTGCTACCAAGACTCCTGCCTAAACTGAGGGTCGC
GCGAGGCGACTATAGCTTCTTAGCCGCCGAAGCTATCGTTGCCGGTACAGGCGCTCCTTGAATAACCCCCTCCCCCCCACGCTATTCTTCAAATTCCGATTTCAGCTTCTCTTTGTTTTTCCTTTTTTGGCACCTCGGAAAAACCTCCACGTGCATGGTTATTCCGCCGATTCCACGGGTGGGGTGCTACCAAGACTCCTGCCTAAACTGAGGGTCGC
GCGAGGCGACTATAGCTTCTTAGCCGCCGAAGCTATCGTTGCCGGTACAGGCGCTCCTTGAATAACCCCCTCCCCCCCACGCTATTCTTCAAATTCCGATTTCAGCTTCTCTTTGTTTTTCCTTTTTTGGCACCTCGGAAAAACCTCCACGTGAGCGGTTATTCCGCCGATTCCACGGGTGGGGTGCTACCAAGACTCCTGCCTAAACTGAGGGTCGC
GCGAGGCGACTATAGCTTCTTAGCCGCCGAAGCTATCGTTGCCGGTACAGGCGCTCCTTGAATAACCCCCTCCCCCCCACGCTATTCTTCAAATTCCGATTTCAGCTTCTCTTTGTTTTTCCTTTTTTGGCACCTCGGAAAAACCTCCACGTGGCGGGTTATTCCGCCGATTCCACGGGTGGGGTGCTACCAAGACTCCTGCCTAAACTGAGGGTCGC
GCGAGGCGACTATAGCTTCTTAGCCGCCGAAGCTATCGTTGCCGGTACAGGCGCTCCTTGAATAACCCCCTCCCCCCCACGCTATTCTTCAAATTCCGATTTCAGCTTCTCTTTGTTTTTCCTTTTTTGGCACCTCGGAAAAACCTCCACGTGTGCAGTTATTCCGCCGATTCCACGGGTGGGGTGCTACCAAGACTCCTGCCTAAACTGAGGGTCGC
GCGAGGCGACTATAGCTTCTTAGCCGCCGAAGCTATCGTTGCCGGTACAGGCGCTCCTTGAATAACCCCCTCCCCCCCACGCTATTCTTCAAATTCCGATTTCAGCTTCTCTTTGTTTTTCCTTTTTTGGCACCTCGGAAAAACCTCCACGTGTATCGTTATTCCGCCGATTCCACGGGTGGGGTGCTACCAAGACTCCTGCCTAAACTGAGGGTCGC
GCGAGGCGACTATAGCTTCTTAGCCGCCGAAGCTATCGTTGCCGGTACAGGCGCTCCTTGAATAACCCCCTCCCCCCCACGCTATTCTTCAAATTCCGATTTCAGCTTCTCTTTGTTTTTCCTTTTTTGGCACCTCGGAAAAACCTCCACGTGTCGTGTTATTCCGCCGATTCCACGGGTGGGGTGCTACCAAGACTCCTGCCTAAACTGAGGGTCGC
GCGAGGCGACTATAGCTTCTTAGCCGCCGAAGCTATCGTTGCCGGTACAGGCGCTCCTTGAATAACCCCCTCCCCCCCACGCTATTCTTCAAATTCCGATTTCAGCTTCTCTTTGTTTTTCCTTTTTTGGCACCTCGGAAAAACCTCCACGTGTTCACTTATTCCGCCGATTCCACGGGTGGGGTGCTACCAAGACTCCTGCCTAAACTGAGGGTCGC
GCGAGGCGACTATAGCTTCTTAGCCGCCGAAGCTATCGTTGCCGGTACAGGCGCTCCTTGAATAACCCCCTCCCCCCCACGCTATTCTTCAAATTCCGATTTCAGCTTCTCTTTGTTTTTCCTTTTTTGGCACCTCGGAAAAACCTCCACGTGTTTCTTTATTCCGCCGATTCCACGGGTGGGGTGCTACCAAGACTCCTGCCTAAACTGAGGGTCGC
GCGAGGCGACTATAGCTTCTTAGCCGCCGAAGCTATCGTTGCCGGTACAGGCGCTCCTTGAATAACCCCCTCCCCCCCACGCTATTCTTCAAATTCCGATTTCAGCTTCTCTTTGTTTTTCCTTTTTTGGCACCTCGGAAAAACCTCCACGTGTTGTATTATTCCGCCGATTCCACGGGTGGGGTGCTACCAAGACTCCTGCCTAAACTGAGGGTCGC
GCGAGGCGACTATAGCTTCTTAGCCGCCGAAGCTATCGTTGCCGGTACAGGCGCTCCTTGAATAACCCCCTCCCCCCCACGCTATTCTTCAAATTCCGATTTCAGCTTCTCTTTGTTTTTCCTTTTTTGGCACCTCGGAAAAACCTCCACGTGTTATCATATTCCGCCGATTCCACGGGTGGGGTGCTACCAAGACTCCTGCCTAAACTGAGGGTCGC
GCGAGGCGACTATAGCTTCTTAGCCGCCGAAGCTATCGTTGCCGGTACAGGCGCTCCTTGAATAACCCCCTCCCCCCCACGCTATTCTTCAAATTCCGATTTCAGCTTCTCTTTGTTTTTCCTTTTTTGGCACCTCGGAAAAACCTCCACGTGTTAATGTATTCCGCCGATTCCACGGGTGGGGTGCTACCAAGACTCCTGCCTAAACTGAGGGTCGC
GCGAGGCGACTATAGCTTCTTAGCCGCCGAAGCTATCGTTGCCGGTACAGGCGCTCCTTGAATAACCCCCTCCCCCCCACGCTATTCTTCAAATTCCGATTTCAGCTTCTCTTTGTTTTTCCTTTTTTGGCACCTCGGAAAAACCTCCACGTGTTACACTATTCCGCCGATTCCACGGGTGGGGTGCTACCAAGACTCCTGCCTAAACTGAGGGTCGC
GCGAGGCGACTATAGCTTCTTAGCCGCCGAAGCTATCGTTGCCGGTACAGGCGCTCCTTGAATAACCCCCTCCCCCCCACGCTATTCTTCAAATTCCGATTTCAGCTTCTCTTTGTTTTTCCTTTTTTGGCACCTCGGAAAAACCTCCACGTGTTAGAGAATTCCGCCGATTCCACGGGTGGGGTGCTACCAAGACTCCTGCCTAAACTGAGGGTCGC
GCGAGGCGACTATAGCTTCTTAGCCGCCGAAGCTATCGTTGCCGGTACAGGCGCTCCTTGAATAACCCCCTCCCCCCCACGCTATTCTTCAAATTCCGATTTCAGCTTCTCTTTGTTTTTCCTTTTTTGGCACCTCGGAAAAACCTCCACGTGTTAGCCCATTCCGCCGATTCCACGGGTGGGGTGCTACCAAGACTCCTGCCTAAACTGAGGGTCGC
GCGAGGCGACTATAGCTTCTTAGCCGCCGAAGCTATCGTTGCCGGTACAGGCGCTCCTTGAATAACCCCCTCCCCCCCACGCTATTCTTCAAATTCCGATTTCAGCTTCTCTTTGTTTTTCCTTTTTTGGCACCTCGGAAAAACCTCCACGTGTTAGTAGATTCCGCCGATTCCACGGGTGGGGTGCTACCAAGACTCCTGCCTAAACTGAGGGTCGC
GCGAGGCGACTATAGCTTCTTAGCCGCCGAAGCTATCGTTGCCGGTACAGGCGCTCCTTGAATAACCCCCTCCCCCCCACGCTATTCTTCAAATTCCGATTTCAGCTTCTCTTTGTTTTTCCTTTTTTGGCACCTCGGAAAAACCTCCACGTGTTAGGAATTTCCGCCGATTCCACGGGTGGGGTGCTACCAAGACTCCTGCCTAAACTGAGGGTCGC
GCGAGGCGACTATAGCTTCTTAGCCGCCGAAGCTATCGTTGCCGGTACAGGCGCTCCTTGAATAACCCCCTCCCCCCCACGCTATTCTTCAAATTCCGATTTCAGCTTCTCTTTGTTTTTCCTTTTTTGGCACCTCGGAAAAACCTCCACGTGTTAGGCGCTTCCGCCGATTCCACGGGTGGGGTGCTACCAAGACTCCTGCCTAAACTGAGGGTCGC
GCGAGGCGACTATAGCTTCTTAGCCGCCGAAGCTATCGTTGCCGGTACAGGCGCTCCTTGAATAACCCCCTCCCCCCCACGCTATTCTTCAAATTCCGATTTCAGCTTCTCTTTGTTTTTCCTTTTTTGGCACCTCGGAAAAACCTCCACGTGTTAGGGCGTTCCGCCGATTCCACGGGTGGGGTGCTACCAAGACTCCTGCCTAAACTGAGGGTCGC
GCGAGGCGACTATAGCTTCTTAGCCGCCGAAGCTATCGTTGCCGGTACAGGCGCTCCTTGAATAACCCCCTCCCCCCCACGCTATTCTTCAAATTCCGATTTCAGCTTCTCTTTGTTTTTCCTTTTTTGGCACCTCGGAAAAACCTCCACGTGTTAGGTGTATCCGCCGATTCCACGGGTGGGGTGCTACCAAGACTCCTGCCTAAACTGAGGGTCGC
GCGAGGCGACTATAGCTTCTTAGCCGCCGAAGCTATCGTTGCCGGTACAGGCGCTCCTTGAATAACCCCCTCCCCCCCACGCTATTCTTCAAATTCCGATTTCAGCTTCTCTTTGTTTTTCCTTTTTTGGCACCTCGGAAAAACCTCCACGTGTTAGGTAGCTCCGCCGATTCCACGGGTGGGGTGCTACCAAGACTCCTGCCTAAACTGAGGGTCGC
GCGAGGCGACTATAGCTTCTTAGCCGCCGAAGCTATCGTTGCCGGTACAGGCGCTCCTTGAATAACCCCCTCCCCCCCACGCTATTCTTCAAATTCCGATTTCAGCTTCTCTTTGTTTTTCCTTTTTTGGCACCTCGGAAAAACCTCCACGTGTTAGGTCCGTCCGCCGATTCCACGGGTGGGGTGCTACCAAGACTCCTGCCTAAACTGAGGGTCGC
GCGAGGCGACTATAGCTTCTTAGCCGCCGAAGCTATCGTTGCCGGTACAGGCGCTCCTTGAATAACCCCCTCCCCCCCACGCTATTCTTCAAATTCCGATTTCAGCTTCTCTTTGTTTTTCCTTTTTTGGCACCTCGGAAAAACCTCCACGTGTTAGGTTCCGCCGCCGATTCCACGGGTGGGGTGCTACCAAGACTCCTGCCTAAACTGAGGGTCGC
GCGAGGCGACTATAGCTTCTTAGCCGCCGAAGCTATCGTTGCCGGTACAGGCGCTCCTTGAATAACCCCCTCCCCCCCACGCTATTCTTCAAATTCCGATTTCAGCTTCTCTTTGTTTTTCCTTTTTTGGCACCTCGGAAAAACCTCCACGTGTTAGGTTGAACCGCCGATTCCACGGGTGGGGTGCTACCAAGACTCCTGCCTAAACTGAGGGTCGC
GCGAGGCGACTATAGCTTCTTAGCCGCCGAAGCTATCGTTGCCGGTACAGGCGCTCCTTGAATAACCCCCTCCCCCCCACGCTATTCTTCAAATTCCGATTTCAGCTTCTCTTTGTTTTTCCTTTTTTGGCACCTCGGAAAAACCTCCACGTGTTAGGTTTGCCCGCCGATTCCACGGGTGGGGTGCTACCAAGACTCCTGCCTAAACTGAGGGTCGC
GCGAGGCGACTATAGCTTCTTAGCCGCCGAAGCTATCGTTGCCGGTACAGGCGCTCCTTGAATAACCCCCTCCCCCCCACGCTATTCTTCAAATTCCGATTTCAGCTTCTCTTTGTTTTTCCTTTTTTGGCACCTCGGAAAAACCTCCACGTGTTAGGTTAAAACGCCGATTCCACGGGTGGGGTGCTACCAAGACTCCTGCCTAAACTGAGGGTCGC
GCGAGGCGACTATAGCTTCTTAGCCGCCGAAGCTATCGTTGCCGGTACAGGCGCTCCTTGAATAACCCCCTCCCCCCCACGCTATTCTTCAAATTCCGATTTCAGCTTCTCTTTGTTTTTCCTTTTTTGGCACCTCGGAAAAACCTCCACGTGTTAGGTTACGGCGCCGATTCCACGGGTGGGGTGCTACCAAGACTCCTGCCTAAACTGAGGGTCGC
GCGAGGCGACTATAGCTTCTTAGCCGCCGAAGCTATCGTTGCCGGTACAGGCGCTCCTTGAATAACCCCCTCCCCCCCACGCTATTCTTCAAATTCCGATTTCAGCTTCTCTTTGTTTTTCCTTTTTTGGCACCTCGGAAAAACCTCCACGTGTTAGGTTAGCTCGCCGATTCCACGGGTGGGGTGCTACCAAGACTCCTGCCTAAACTGAGGGTCGC
GCGAGGCGACTATAGCTTCTTAGCCGCCGAAGCTATCGTTGCCGGTACAGGCGCTCCTTGAATAACCCCCTCCCCCCCACGCTATTCTTCAAATTCCGATTTCAGCTTCTCTTTGTTTTTCCTTTTTTGGCACCTCGGAAAAACCTCCACGTGTTAGGTTATATGGCCGATTCCACGGGTGGGGTGCTACCAAGACTCCTGCCTAAACTGAGGGTCGC
GCGAGGCGACTATAGCTTCTTAGCCGCCGAAGCTATCGTTGCCGGTACAGGCGCTCCTTGAATAACCCCCTCCCCCCCACGCTATTCTTCAAATTCCGATTTCAGCTTCTCTTTGTTTTTCCTTTTTTGGCACCTCGGAAAAACCTCCACGTGTTAGGTTATCGAGCCGATTCCACGGGTGGGGTGCTACCAAGACTCCTGCCTAAACTGAGGGTCGC
GCGAGGCGACTATAGCTTCTTAGCCGCCGAAGCTATCGTTGCCGGTACAGGCGCTCCTTGAATAACCCCCTCCCCCCCACGCTATTCTTCAAATTCCGATTTCAGCTTCTCTTTGTTTTTCCTTTTTTGGCACCTCGGAAAAACCTCCACGTGTTAGGTTATGATGCCGATTCCACGGGTGGGGTGCTACCAAGACTCCTGCCTAAACTGAGGGTCGC
GCGAGGCGACTATAGCTTCTTAGCCGCCGAAGCTATCGTTGCCGGTACAGGCGCTCCTTGAATAACCCCCTCCCCCCCACGCTATTCTTCAAATTCCGATTTCAGCTTCTCTTTGTTTTTCCTTTTTTGGCACCTCGGAAAAACCTCCACGTGTTAGGTTATTTGACCGATTCCACGGGTGGGGTGCTACCAAGACTCCTGCCTAAACTGAGGGTCGC
GCGAGGCGACTATAGCTTCTTAGCCGCCGAAGCTATCGTTGCCGGTACAGGCGCTCCTTGAATAACCCCCTCCCCCCCACGCTATTCTTCAAATTCCGATTTCAGCTTCTCTTTGTTTTTCCTTTTTTGGCACCTCGGAAAAACCTCCACGTGTTAGGTTATTAACCCGATTCCACGGGTGGGGTGCTACCAAGACTCCTGCCTAAACTGAGGGTCGC
GCGAGGCGACTATAGCTTCTTAGCCGCCGAAGCTATCGTTGCCGGTACAGGCGCTCCTTGAATAACCCCCTCCCCCCCACGCTATTCTTCAAATTCCGATTTCAGCTTCTCTTTGTTTTTCCTTTTTTGGCACCTCGGAAAAACCTCCACGTGTTAGGTTATTGTTCCGATTCCACGGGTGGGGTGCTACCAAGACTCCTGCCTAAACTGAGGGTCGC
GCGAGGCGACTATAGCTTCTTAGCCGCCGAAGCTATCGTTGCCGGTACAGGCGCTCCTTGAATAACCCCCTCCCCCCCACGCTATTCTTCAAATTCCGATTTCAGCTTCTCTTTGTTTTTCCTTTTTTGGCACCTCGGAAAAACCTCCACGTGTTAGGTTATTCGCACGATTCCACGGGTGGGGTGCTACCAAGACTCCTGCCTAAACTGAGGGTCGC
GCGAGGCGACTATAGCTTCTTAGCCGCCGAAGCTATCGTTGCCGGTACAGGCGCTCCTTGAATAACCCCCTCCCCCCCACGCTATTCTTCAAATTCCGATTTCAGCTTCTCTTTGTTTTTCCTTTTTTGGCACCTCGGAAAAACCTCCACGTGTTAGGTTATTCTAGCGATTCCACGGGTGGGGTGCTACCAAGACTCCTGCCTAAACTGAGGGTCGC
GCGAGGCGACTATAGCTTCTTAGCCGCCGAAGCTATCGTTGCCGGTACAGGCGCTCCTTGAATAACCCCCTCCCCCCCACGCTATTCTTCAAATTCCGATTTCAGCTTCTCTTTGTTTTTCCTTTTTTGGCACCTCGGAAAAACCTCCACGTGTTAGGTTATTCATTCGATTCCACGGGTGGGGTGCTACCAAGACTCCTGCCTAAACTGAGGGTCGC
GCGAGGCGACTATAGCTTCTTAGCCGCCGAAGCTATCGTTGCCGGTACAGGCGCTCCTTGAATAACCCCCTCCCCCCCACGCTATTCTTCAAATTCCGATTTCAGCTTCTCTTTGTTTTTCCTTTTTTGGCACCTCGGAAAAACCTCCACGTGTTAGGTTATTCCAGTGATTCCACGGGTGGGGTGCTACCAAGACTCCTGCCTAAACTGAGGGTCGC
GCGAGGCGACTATAGCTTCTTAGCCGCCGAAGCTATCGTTGCCGGTACAGGCGCTCCTTGAATAACCCCCTCCCCCCCACGCTATTCTTCAAATTCCGATTTCAGCTTCTCTTTGTTTTTCCTTTTTTGGCACCTCGGAAAAACCTCCACGTGTTAGGTTATTCCTTGGATTCCACGGGTGGGGTGCTACCAAGACTCCTGCCTAAACTGAGGGTCGC
GCGAGGCGACTATAGCTTCTTAGCCGCCGAAGCTATCGTTGCCGGTACAGGCGCTCCTTGAATAACCCCCTCCCCCCCACGCTATTCTTCAAATTCCGATTTCAGCTTCTCTTTGTTTTTCCTTTTTTGGCACCTCGGAAAAACCTCCACGTGTTAGGTTATTCCCAAGATTCCACGGGTGGGGTGCTACCAAGACTCCTGCCTAAACTGAGGGTCGC
GCGAGGCGACTATAGCTTCTTAGCCGCCGAAGCTATCGTTGCCGGTACAGGCGCTCCTTGAATAACCCCCTCCCCCCCACGCTATTCTTCAAATTCCGATTTCAGCTTCTCTTTGTTTTTCCTTTTTTGGCACCTCGGAAAAACCTCCACGTGTTAGGTTATTCCGAATATTCCACGGGTGGGGTGCTACCAAGACTCCTGCCTAAACTGAGGGTCGC
GCGAGGCGACTATAGCTTCTTAGCCGCCGAAGCTATCGTTGCCGGTACAGGCGCTCCTTGAATAACCCCCTCCCCCCCACGCTATTCTTCAAATTCCGATTTCAGCTTCTCTTTGTTTTTCCTTTTTTGGCACCTCGGAAAAACCTCCACGTGTTAGGTTATTCCGGGCATTCCACGGGTGGGGTGCTACCAAGACTCCTGCCTAAACTGAGGGTCGC
GCGAGGCGACTATAGCTTCTTAGCCGCCGAAGCTATCGTTGCCGGTACAGGCGCTCCTTGAATAACCCCCTCCCCCCCACGCTATTCTTCAAATTCCGATTTCAGCTTCTCTTTGTTTTTCCTTTTTTGGCACCTCGGAAAAACCTCCACGTGTTAGGTTATTCCGTTAATTCCACGGGTGGGGTGCTACCAAGACTCCTGCCTAAACTGAGGGTCGC
GCGAGGCGACTATAGCTTCTTAGCCGCCGAAGCTATCGTTGCCGGTACAGGCGCTCCTTGAATAACCCCCTCCCCCCCACGCTATTCTTCAAATTCCGATTTCAGCTTCTCTTTGTTTTTCCTTTTTTGGCACCTCGGAAAAACCTCCACGTGTTAGGTTATTCCGCGACTTCCACGGGTGGGGTGCTACCAAGACTCCTGCCTAAACTGAGGGTCGC
GCGAGGCGACTATAGCTTCTTAGCCGCCGAAGCTATCGTTGCCGGTACAGGCGCTCCTTGAATAACCCCCTCCCCCCCACGCTATTCTTCAAATTCCGATTTCAGCTTCTCTTTGTTTTTCCTTTTTTGGCACCTCGGAAAAACCTCCACGTGTTAGGTTATTCCGCTTTTTCCACGGGTGGGGTGCTACCAAGACTCCTGCCTAAACTGAGGGTCGC
GCGAGGCGACTATAGCTTCTTAGCCGCCGAAGCTATCGTTGCCGGTACAGGCGCTCCTTGAATAACCCCCTCCCCCCCACGCTATTCTTCAAATTCCGATTTCAGCTTCTCTTTGTTTTTCCTTTTTTGGCACCTCGGAAAAACCTCCACGTGTTAGGTTATTCCGCACGTTCCACGGGTGGGGTGCTACCAAGACTCCTGCCTAAACTGAGGGTCGC
GCGAGGCGACTATAGCTTCTTAGCCGCCGAAGCTATCGTTGCCGGTACAGGCGCTCCTTGAATAACCCCCTCCCCCCCACGCTATTCTTCAAATTCCGATTTCAGCTTCTCTTTGTTTTTCCTTTTTTGGCACCTCGGAAAAACCTCCACGTGTTAGGTTATTCCGCCTCATCCACGGGTGGGGTGCTACCAAGACTCCTGCCTAAACTGAGGGTCGC
GCGAGGCGACTATAGCTTCTTAGCCGCCGAAGCTATCGTTGCCGGTACAGGCGCTCCTTGAATAACCCCCTCCCCCCCACGCTATTCTTCAAATTCCGATTTCAGCTTCTCTTTGTTTTTCCTTTTTTGGCACCTCGGAAAAACCTCCACGTGTTAGGTTATTCCGCCAGGTCCACGGGTGGGGTGCTACCAAGACTCCTGCCTAAACTGAGGGTCGC
GCGAGGCGACTATAGCTTCTTAGCCGCCGAAGCTATCGTTGCCGGTACAGGCGCTCCTTGAATAACCCCCTCCCCCCCACGCTATTCTTCAAATTCCGATTTCAGCTTCTCTTTGTTTTTCCTTTTTTGGCACCTCGGAAAAACCTCCACGTGTTAGGTTATTCCGCCCTCTCCACGGGTGGGGTGCTACCAAGACTCCTGCCTAAACTGAGGGTCGC
GCGAGGCGACTATAGCTTCTTAGCCGCCGAAGCTATCGTTGCCGGTACAGGCGCTCCTTGAATAACCCCCTCCCCCCCACGCTATTCTTCAAATTCCGATTTCAGCTTCTCTTTGTTTTTCCTTTTTTGGCACCTCGGAAAAACCTCCACGTGTTAGGTTATTCCGCCGTACCCACGGGTGGGGTGCTACCAAGACTCCTGCCTAAACTGAGGGTCGC
GCGAGGCGACTATAGCTTCTTAGCCGCCGAAGCTATCGTTGCCGGTACAGGCGCTCCTTGAATAACCCCCTCCCCCCCACGCTATTCTTCAAATTCCGATTTCAGCTTCTCTTTGTTTTTCCTTTTTTGGCACCTCGGAAAAACCTCCACGTGTTAGGTTATTCCGCCGCCGCCACGGGTGGGGTGCTACCAAGACTCCTGCCTAAACTGAGGGTCGC
GCGAGGCGACTATAGCTTCTTAGCCGCCGAAGCTATCGTTGCCGGTACAGGCGCTCCTTGAATAACCCCCTCCCCCCCACGCTATTCTTCAAATTCCGATTTCAGCTTCTCTTTGTTTTTCCTTTTTTGGCACCTCGGAAAAACCTCCACGTGTTAGGTTATTCCGCCGGGACCACGGGTGGGGTGCTACCAAGACTCCTGCCTAAACTGAGGGTCGC
GCGAGGCGACTATAGCTTCTTAGCCGCCGAAGCTATCGTTGCCGGTACAGGCGCTCCTTGAATAACCCCCTCCCCCCCACGCTATTCTTCAAATTCCGATTTCAGCTTCTCTTTGTTTTTCCTTTTTTGGCACCTCGGAAAAACCTCCACGTGTTAGGTTATTCCGCCGAGGTCACGGGTGGGGTGCTACCAAGACTCCTGCCTAAACTGAGGGTCGC
GCGAGGCGACTATAGCTTCTTAGCCGCCGAAGCTATCGTTGCCGGTACAGGCGCTCCTTGAATAACCCCCTCCCCCCCACGCTATTCTTCAAATTCCGATTTCAGCTTCTCTTTGTTTTTCCTTTTTTGGCACCTCGGAAAAACCTCCACGTGTTAGGTTATTCCGCCGAACACACGGGTGGGGTGCTACCAAGACTCCTGCCTAAACTGAGGGTCGC
GCGAGGCGACTATAGCTTCTTAGCCGCCGAAGCTATCGTTGCCGGTACAGGCGCTCCTTGAATAACCCCCTCCCCCCCACGCTATTCTTCAAATTCCGATTTCAGCTTCTCTTTGTTTTTCCTTTTTTGGCACCTCGGAAAAACCTCCACGTGTTAGGTTATTCCGCCGACAGCACGGGTGGGGTGCTACCAAGACTCCTGCCTAAACTGAGGGTCGC
GCGAGGCGACTATAGCTTCTTAGCCGCCGAAGCTATCGTTGCCGGTACAGGCGCTCCTTGAATAACCCCCTCCCCCCCACGCTATTCTTCAAATTCCGATTTCAGCTTCTCTTTGTTTTTCCTTTTTTGGCACCTCGGAAAAACCTCCACGTGTTAGGTTATTCCGCCGATGTAACGGGTGGGGTGCTACCAAGACTCCTGCCTAAACTGAGGGTCGC
GCGAGGCGACTATAGCTTCTTAGCCGCCGAAGCTATCGTTGCCGGTACAGGCGCTCCTTGAATAACCCCCTCCCCCCCACGCTATTCTTCAAATTCCGATTTCAGCTTCTCTTTGTTTTTCCTTTTTTGGCACCTCGGAAAAACCTCCACGTGTTAGGTTATTCCGCCGATAATACGGGTGGGGTGCTACCAAGACTCCTGCCTAAACTGAGGGTCGC
GCGAGGCGACTATAGCTTCTTAGCCGCCGAAGCTATCGTTGCCGGTACAGGCGCTCCTTGAATAACCCCCTCCCCCCCACGCTATTCTTCAAATTCCGATTTCAGCTTCTCTTTGTTTTTCCTTTTTTGGCACCTCGGAAAAACCTCCACGTGTTAGGTTATTCCGCCGATGGGACGGGTGGGGTGCTACCAAGACTCCTGCCTAAACTGAGGGTCGC
GCGAGGCGACTATAGCTTCTTAGCCGCCGAAGCTATCGTTGCCGGTACAGGCGCTCCTTGAATAACCCCCTCCCCCCCACGCTATTCTTCAAATTCCGATTTCAGCTTCTCTTTGTTTTTCCTTTTTTGGCACCTCGGAAAAACCTCCACGTGTTAGGTTATTCCGCCGATTGAGCGGGTGGGGTGCTACCAAGACTCCTGCCTAAACTGAGGGTCGC
GCGAGGCGACTATAGCTTCTTAGCCGCCGAAGCTATCGTTGCCGGTACAGGCGCTCCTTGAATAACCCCCTCCCCCCCACGCTATTCTTCAAATTCCGATTTCAGCTTCTCTTTGTTTTTCCTTTTTTGGCACCTCGGAAAAACCTCCACGTGTTAGGTTATTCCGCCGATTTGCCGGGTGGGGTGCTACCAAGACTCCTGCCTAAACTGAGGGTCGC
GCGAGGCGACTATAGCTTCTTAGCCGCCGAAGCTATCGTTGCCGGTACAGGCGCTCCTTGAATAACCCCCTCCCCCCCACGCTATTCTTCAAATTCCGATTTCAGCTTCTCTTTGTTTTTCCTTTTTTGGCACCTCGGAAAAACCTCCACGTGTTAGGTTATTCCGCCGATTATTCGGGTGGGGTGCTACCAAGACTCCTGCCTAAACTGAGGGTCGC
GCGAGGCGACTATAGCTTCTTAGCCGCCGAAGCTATCGTTGCCGGTACAGGCGCTCCTTGAATAACCCCCTCCCCCCCACGCTATTCTTCAAATTCCGATTTCAGCTTCTCTTTGTTTTTCCTTTTTTGGCACCTCGGAAAAACCTCCACGTGTTAGGTTATTCCGCCGATTCTGTGGGTGGGGTGCTACCAAGACTCCTGCCTAAACTGAGGGTCGC
GCGAGGCGACTATAGCTTCTTAGCCGCCGAAGCTATCGTTGCCGGTACAGGCGCTCCTTGAATAACCCCCTCCCCCCCACGCTATTCTTCAAATTCCGATTTCAGCTTCTCTTTGTTTTTCCTTTTTTGGCACCTCGGAAAAACCTCCACGTGTTAGGTTATTCCGCCGATTCACGGGGTGGGGTGCTACCAAGACTCCTGCCTAAACTGAGGGTCGC
GCGAGGCGACTATAGCTTCTTAGCCGCCGAAGCTATCGTTGCCGGTACAGGCGCTCCTTGAATAACCCCCTCCCCCCCACGCTATTCTTCAAATTCCGATTTCAGCTTCTCTTTGTTTTTCCTTTTTTGGCACCTCGGAAAAACCTCCACGTGTTAGGTTATTCCGCCGATTCGTAGGGTGGGGTGCTACCAAGACTCCTGCCTAAACTGAGGGTCGC
GCGAGGCGACTATAGCTTCTTAGCCGCCGAAGCTATCGTTGCCGGTACAGGCGCTCCTTGAATAACCCCCTCCCCCCCACGCTATTCTTCAAATTCCGATTTCAGCTTCTCTTTGTTTTTCCTTTTTTGGCACCTCGGAAAAACCTCCACGTGTTAGGTTATTCCGCCGATTCCTACGGTGGGGTGCTACCAAGACTCCTGCCTAAACTGAGGGTCGC
GCGAGGCGACTATAGCTTCTTAGCCGCCGAAGCTATCGTTGCCGGTACAGGCGCTCCTTGAATAACCCCCTCCCCCCCACGCTATTCTTCAAATTCCGATTTCAGCTTCTCTTTGTTTTTCCTTTTTTGGCACCTCGGAAAAACCTCCACGTGTTAGGTTATTCCGCCGATTCCCTTGGTGGGGTGCTACCAAGACTCCTGCCTAAACTGAGGGTCGC
GCGAGGCGACTATAGCTTCTTAGCCGCCGAAGCTATCGTTGCCGGTACAGGCGCTCCTTGAATAACCCCCTCCCCCCCACGCTATTCTTCAAATTCCGATTTCAGCTTCTCTTTGTTTTTCCTTTTTTGGCACCTCGGAAAAACCTCCACGTGTTAGGTTATTCCGCCGATTCCGGAGGTGGGGTGCTACCAAGACTCCTGCCTAAACTGAGGGTCGC
GCGAGGCGACTATAGCTTCTTAGCCGCCGAAGCTATCGTTGCCGGTACAGGCGCTCCTTGAATAACCCCCTCCCCCCCACGCTATTCTTCAAATTCCGATTTCAGCTTCTCTTTGTTTTTCCTTTTTTGGCACCTCGGAAAAACCTCCACGTGTTAGGTTATTCCGCCGATTCCATTCGTGGGGTGCTACCAAGACTCCTGCCTAAACTGAGGGTCGC
GCGAGGCGACTATAGCTTCTTAGCCGCCGAAGCTATCGTTGCCGGTACAGGCGCTCCTTGAATAACCCCCTCCCCCCCACGCTATTCTTCAAATTCCGATTTCAGCTTCTCTTTGTTTTTCCTTTTTTGGCACCTCGGAAAAACCTCCACGTGTTAGGTTATTCCGCCGATTCCAGAAGTGGGGTGCTACCAAGACTCCTGCCTAAACTGAGGGTCGC
GCGAGGCGACTATAGCTTCTTAGCCGCCGAAGCTATCGTTGCCGGTACAGGCGCTCCTTGAATAACCCCCTCCCCCCCACGCTATTCTTCAAATTCCGATTTCAGCTTCTCTTTGTTTTTCCTTTTTTGGCACCTCGGAAAAACCTCCACGTGTTAGGTTATTCCGCCGATTCCAACTGTGGGGTGCTACCAAGACTCCTGCCTAAACTGAGGGTCGC
GCGAGGCGACTATAGCTTCTTAGCCGCCGAAGCTATCGTTGCCGGTACAGGCGCTCCTTGAATAACCCCCTCCCCCCCACGCTATTCTTCAAATTCCGATTTCAGCTTCTCTTTGTTTTTCCTTTTTTGGCACCTCGGAAAAACCTCCACGTGTTAGGTTATTCCGCCGATTCCACTTATGGGGTGCTACCAAGACTCCTGCCTAAACTGAGGGTCGC
GCGAGGCGACTATAGCTTCTTAGCCGCCGAAGCTATCGTTGCCGGTACAGGCGCTCCTTGAATAACCCCCTCCCCCCCACGCTATTCTTCAAATTCCGATTTCAGCTTCTCTTTGTTTTTCCTTTTTTGGCACCTCGGAAAAACCTCCACGTGTTAGGTTATTCCGCCGATTCCACACTTGGGGTGCTACCAAGACTCCTGCCTAAACTGAGGGTCGC
GCGAGGCGACTATAGCTTCTTAGCCGCCGAAGCTATCGTTGCCGGTACAGGCGCTCCTTGAATAACCCCCTCCCCCCCACGCTATTCTTCAAATTCCGATTTCAGCTTCTCTTTGTTTTTCCTTTTTTGGCACCTCGGAAAAACCTCCACGTGTTAGGTTATTCCGCCGATTCCACCACTGGGGTGCTACCAAGACTCCTGCCTAAACTGAGGGTCGC
GCGAGGCGACTATAGCTTCTTAGCCGCCGAAGCTATCGTTGCCGGTACAGGCGCTCCTTGAATAACCCCCTCCCCCCCACGCTATTCTTCAAATTCCGATTTCAGCTTCTCTTTGTTTTTCCTTTTTTGGCACCTCGGAAAAACCTCCACGTGTTAGGTTATTCCGCCGATTCCACGCAAGGGGTGCTACCAAGACTCCTGCCTAAACTGAGGGTCGC
GCGAGGCGACTATAGCTTCTTAGCCGCCGAAGCTATCGTTGCCGGTACAGGCGCTCCTTGAATAACCCCCTCCCCCCCACGCTATTCTTCAAATTCCGATTTCAGCTTCTCTTTGTTTTTCCTTTTTTGGCACCTCGGAAAAACCTCCACGTGTTAGGTTATTCCGCCGATTCCACGTCCGGGGTGCTACCAAGACTCCTGCCTAAACTGAGGGTCGC
GCGAGGCGACTATAGCTTCTTAGCCGCCGAAGCTATCGTTGCCGGTACAGGCGCTCCTTGAATAACCCCCTCCCCCCCACGCTATTCTTCAAATTCCGATTTCAGCTTCTCTTTGTTTTTCCTTTTTTGGCACCTCGGAAAAACCTCCACGTGTTAGGTTATTCCGCCGATTCCACGATGGGGGTGCTACCAAGACTCCTGCCTAAACTGAGGGTCGC
GCGAGGCGACTATAGCTTCTTAGCCGCCGAAGCTATCGTTGCCGGTACAGGCGCTCCTTGAATAACCCCCTCCCCCCCACGCTATTCTTCAAATTCCGATTTCAGCTTCTCTTTGTTTTTCCTTTTTTGGCACCTCGGAAAAACCTCCACGTGTTAGGTTATTCCGCCGATTCCACGGACAGGGTGCTACCAAGACTCCTGCCTAAACTGAGGGTCGC
GCGAGGCGACTATAGCTTCTTAGCCGCCGAAGCTATCGTTGCCGGTACAGGCGCTCCTTGAATAACCCCCTCCCCCCCACGCTATTCTTCAAATTCCGATTTCAGCTTCTCTTTGTTTTTCCTTTTTTGGCACCTCGGAAAAACCTCCACGTGTTAGGTTATTCCGCCGATTCCACGGTGCGGGTGCTACCAAGACTCCTGCCTAAACTGAGGGTCGC
GCGAGGCGACTATAGCTTCTTAGCCGCCGAAGCTATCGTTGCCGGTACAGGCGCTCCTTGAATAACCCCCTCCCCCCCACGCTATTCTTCAAATTCCGATTTCAGCTTCTCTTTGTTTTTCCTTTTTTGGCACCTCGGAAAAACCTCCACGTGTTAGGTTATTCCGCCGATTCCACGGCATGGGTGCTACCAAGACTCCTGCCTAAACTGAGGGTCGC

## Sheet: barcoded trans MAP-C primers
name	sequence
ampseqF-pl1-bcA1-mutreg4_F	GGCTGTGAGAGAGCTCAGCTGGCGCATAGTTCTTAGCCGCCGAAGCT
ampseqF-pl1-bcB1-mutreg4_F	GGCTGTGAGAGAGCTCAGTACGATAGACATTCTTAGCCGCCGAAGCT
ampseqF-pl1-bcC1-mutreg4_F	GGCTGTGAGAGAGCTCAGGCTTAGTTGCTCTCTTAGCCGCCGAAGCT
ampseqF-pl1-bcD1-mutreg4_F	GGCTGTGAGAGAGCTCAGCTGGTGATGCCTTCTTAGCCGCCGAAGCT
ampseqF-pl1-bcE1-mutreg4_F	GGCTGTGAGAGAGCTCAGTCGCACATACTCTCTTAGCCGCCGAAGCT
ampseqF-pl1-bcF1-mutreg4_F	GGCTGTGAGAGAGCTCAGCCAGCTAGCGCGTCTTAGCCGCCGAAGCT
ampseqF-pl1-bcG1-mutreg4_F	GGCTGTGAGAGAGCTCAGACGCGTAATCAATCTTAGCCGCCGAAGCT
ampseqF-pl1-bcH1-mutreg4_F	GGCTGTGAGAGAGCTCAGCTGGCAGTACAATCTTAGCCGCCGAAGCT
ampseqF-pl1-bcA2-mutreg4_F	GGCTGTGAGAGAGCTCAGTCACTACGCAAGTCTTAGCCGCCGAAGCT
ampseqF-pl1-bcB2-mutreg4_F	GGCTGTGAGAGAGCTCAGGAACTGGACTAGTCTTAGCCGCCGAAGCT
ampseqF-pl1-bcC2-mutreg4_F	GGCTGTGAGAGAGCTCAGGTGGAATAACATTCTTAGCCGCCGAAGCT
ampseqF-pl1-bcD2-mutreg4_F	GGCTGTGAGAGAGCTCAGTGATACAGCGTATCTTAGCCGCCGAAGCT
ampseqF-pl1-bcE2-mutreg4_F	GGCTGTGAGAGAGCTCAGCGTATAAGAATGTCTTAGCCGCCGAAGCT
ampseqF-pl1-bcF2-mutreg4_F	GGCTGTGAGAGAGCTCAGTTGACTAACGCGTCTTAGCCGCCGAAGCT
ampseqF-pl1-bcG2-mutreg4_F	GGCTGTGAGAGAGCTCAGATAATCAGGACGTCTTAGCCGCCGAAGCT
ampseqF-pl1-bcH2-mutreg4_F	GGCTGTGAGAGAGCTCAGTTCCAGGCGTATTCTTAGCCGCCGAAGCT
ampseqF-pl1-bcA3-mutreg4_F	GGCTGTGAGAGAGCTCAGCTTCAAGAGCTCTCTTAGCCGCCGAAGCT
ampseqF-pl1-bcB3-mutreg4_F	GGCTGTGAGAGAGCTCAGAGCATGGTTGGTTCTTAGCCGCCGAAGCT
ampseqF-pl1-bcC3-mutreg4_F	GGCTGTGAGAGAGCTCAGTGCAACTTCACGTCTTAGCCGCCGAAGCT
ampseqF-pl1-bcD3-mutreg4_F	GGCTGTGAGAGAGCTCAGTGTCACTTAAGCTCTTAGCCGCCGAAGCT
ampseqF-pl1-bcE3-mutreg4_F	GGCTGTGAGAGAGCTCAGGTATCGTCACCTTCTTAGCCGCCGAAGCT
ampseqF-pl1-bcF3-mutreg4_F	GGCTGTGAGAGAGCTCAGTGCTACGAATCATCTTAGCCGCCGAAGCT
ampseqF-pl1-bcG3-mutreg4_F	GGCTGTGAGAGAGCTCAGGACAGGTCTACGTCTTAGCCGCCGAAGCT
ampseqF-pl1-bcH3-mutreg4_F	GGCTGTGAGAGAGCTCAGGCTCGAACACAATCTTAGCCGCCGAAGCT
ampseqF-pl1-bcA4-mutreg4_F	GGCTGTGAGAGAGCTCAGCACATGAGTCATTCTTAGCCGCCGAAGCT
ampseqF-pl1-bcB4-mutreg4_F	GGCTGTGAGAGAGCTCAGGAGCTATGACTCTCTTAGCCGCCGAAGCT
ampseqF-pl1-bcC4-mutreg4_F	GGCTGTGAGAGAGCTCAGAACGTCAGTTCATCTTAGCCGCCGAAGCT
ampseqF-pl1-bcD4-mutreg4_F	GGCTGTGAGAGAGCTCAGTAGAATCCTATTTCTTAGCCGCCGAAGCT
ampseqF-pl1-bcE4-mutreg4_F	GGCTGTGAGAGAGCTCAGTGTTCCAGTCATTCTTAGCCGCCGAAGCT
ampseqF-pl1-bcF4-mutreg4_F	GGCTGTGAGAGAGCTCAGAACGCGCTTGTCTCTTAGCCGCCGAAGCT
ampseqF-pl1-bcG4-mutreg4_F	GGCTGTGAGAGAGCTCAGTCTCGAAGTAGCTCTTAGCCGCCGAAGCT
ampseqF-pl1-bcH4-mutreg4_F	GGCTGTGAGAGAGCTCAGGAATAGTGGCGTTCTTAGCCGCCGAAGCT
ampseqF-pl1-bcA5-mutreg4_F	GGCTGTGAGAGAGCTCAGATGGAGCACGTATCTTAGCCGCCGAAGCT
ampseqF-pl1-bcB5-mutreg4_F	GGCTGTGAGAGAGCTCAGGGAACTTGTCGTTCTTAGCCGCCGAAGCT
ampseqF-pl1-bcC5-mutreg4_F	GGCTGTGAGAGAGCTCAGAGTCATAGCTGTTCTTAGCCGCCGAAGCT
ampseqF-pl1-bcD5-mutreg4_F	GGCTGTGAGAGAGCTCAGGCCTGTAGCGATTCTTAGCCGCCGAAGCT
ampseqF-pl1-bcE5-mutreg4_F	GGCTGTGAGAGAGCTCAGTGAGACATGACATCTTAGCCGCCGAAGCT
ampseqF-pl1-bcF5-mutreg4_F	GGCTGTGAGAGAGCTCAGATGCCTAAGTAATCTTAGCCGCCGAAGCT
ampseqF-pl1-bcG5-mutreg4_F	GGCTGTGAGAGAGCTCAGGGATTGCCTATTTCTTAGCCGCCGAAGCT
ampseqF-pl1-bcH5-mutreg4_F	GGCTGTGAGAGAGCTCAGTGTACAGGTCAGTCTTAGCCGCCGAAGCT
ampseqF-pl1-bcA6-mutreg4_F	GGCTGTGAGAGAGCTCAGGCTGGCCTACTTTCTTAGCCGCCGAAGCT
ampseqF-pl1-bcB6-mutreg4_F	GGCTGTGAGAGAGCTCAGCAAGCTTATTGTTCTTAGCCGCCGAAGCT
ampseqF-pl1-bcC6-mutreg4_F	GGCTGTGAGAGAGCTCAGAGGTCTCTGCGCTCTTAGCCGCCGAAGCT
ampseqF-pl1-bcD6-mutreg4_F	GGCTGTGAGAGAGCTCAGCTCACGACAGCATCTTAGCCGCCGAAGCT
ampseqF-pl1-bcE6-mutreg4_F	GGCTGTGAGAGAGCTCAGCACCATGTGTAATCTTAGCCGCCGAAGCT
ampseqF-pl1-bcF6-mutreg4_F	GGCTGTGAGAGAGCTCAGAACTCGAATGGCTCTTAGCCGCCGAAGCT
ampseqF-pl1-bcG6-mutreg4_F	GGCTGTGAGAGAGCTCAGCTATAGGCAGCTTCTTAGCCGCCGAAGCT
ampseqF-pl1-bcH6-mutreg4_F	GGCTGTGAGAGAGCTCAGCATCGTGACACTTCTTAGCCGCCGAAGCT
ampseqF-pl1-bcA7-mutreg4_F	GGCTGTGAGAGAGCTCAGCAGCAATGACCATCTTAGCCGCCGAAGCT
ampseqF-pl1-bcB7-mutreg4_F	GGCTGTGAGAGAGCTCAGACTAATCAGACTTCTTAGCCGCCGAAGCT
ampseqF-pl1-bcC7-mutreg4_F	GGCTGTGAGAGAGCTCAGTATACCAGTCTATCTTAGCCGCCGAAGCT
ampseqF-pl1-bcD7-mutreg4_F	GGCTGTGAGAGAGCTCAGCGATGCTGGCTCTCTTAGCCGCCGAAGCT
ampseqF-pl1-bcE7-mutreg4_F	GGCTGTGAGAGAGCTCAGATACTGAGATGTTCTTAGCCGCCGAAGCT
ampseqF-pl1-bcF7-mutreg4_F	GGCTGTGAGAGAGCTCAGCTGGCATGGACTTCTTAGCCGCCGAAGCT
ampseqF-pl1-bcG7-mutreg4_F	GGCTGTGAGAGAGCTCAGTAGGTTAGTAACTCTTAGCCGCCGAAGCT
ampseqF-pl1-bcH7-mutreg4_F	GGCTGTGAGAGAGCTCAGAACTGTCTCGTATCTTAGCCGCCGAAGCT
ampseqF-pl1-bcA8-mutreg4_F	GGCTGTGAGAGAGCTCAGGTGATTCGCAGGTCTTAGCCGCCGAAGCT
ampseqF-pl1-bcB8-mutreg4_F	GGCTGTGAGAGAGCTCAGAAGTCATGCTAATCTTAGCCGCCGAAGCT
ampseqF-pl1-bcC8-mutreg4_F	GGCTGTGAGAGAGCTCAGCTATAGCTATCCTCTTAGCCGCCGAAGCT
ampseqF-pl1-bcD8-mutreg4_F	GGCTGTGAGAGAGCTCAGCAGCCTGGTCTATCTTAGCCGCCGAAGCT
ampseqF-pl1-bcE8-mutreg4_F	GGCTGTGAGAGAGCTCAGGTTACTGCACACTCTTAGCCGCCGAAGCT
ampseqF-pl1-bcF8-mutreg4_F	GGCTGTGAGAGAGCTCAGCTGACCTTGTCATCTTAGCCGCCGAAGCT
ampseqF-pl1-bcG8-mutreg4_F	GGCTGTGAGAGAGCTCAGAGCATAGAACTTTCTTAGCCGCCGAAGCT
ampseqF-pl1-bcH8-mutreg4_F	GGCTGTGAGAGAGCTCAGGCGTTCACGAGGTCTTAGCCGCCGAAGCT
ampseqF-pl1-bcA9-mutreg4_F	GGCTGTGAGAGAGCTCAGCATGGTGTTCAATCTTAGCCGCCGAAGCT
ampseqF-pl1-bcB9-mutreg4_F	GGCTGTGAGAGAGCTCAGAGCATCTGCATTTCTTAGCCGCCGAAGCT
ampseqF-pl1-bcC9-mutreg4_F	GGCTGTGAGAGAGCTCAGCTACGTAGCGACTCTTAGCCGCCGAAGCT
ampseqF-pl1-bcD9-mutreg4_F	GGCTGTGAGAGAGCTCAGTGCCTACGAGTTTCTTAGCCGCCGAAGCT
ampseqF-pl1-bcE9-mutreg4_F	GGCTGTGAGAGAGCTCAGTGAAGCGAACTCTCTTAGCCGCCGAAGCT
ampseqF-pl1-bcF9-mutreg4_F	GGCTGTGAGAGAGCTCAGATACCTACGCGTTCTTAGCCGCCGAAGCT
ampseqF-pl1-bcG9-mutreg4_F	GGCTGTGAGAGAGCTCAGATGCAGTTAACGTCTTAGCCGCCGAAGCT
ampseqF-pl1-bcH9-mutreg4_F	GGCTGTGAGAGAGCTCAGTACGTCTTATGCTCTTAGCCGCCGAAGCT
ampseqF-pl1-bcA10-mutreg4_F	GGCTGTGAGAGAGCTCAGCGTAGCGATAAGTCTTAGCCGCCGAAGCT
ampseqF-pl1-bcB10-mutreg4_F	GGCTGTGAGAGAGCTCAGCACTATAGTGTATCTTAGCCGCCGAAGCT
ampseqF-pl1-bcC10-mutreg4_F	GGCTGTGAGAGAGCTCAGTGCTGACAACTCTCTTAGCCGCCGAAGCT
ampseqF-pl1-bcD10-mutreg4_F	GGCTGTGAGAGAGCTCAGTATATGAGCGCCTCTTAGCCGCCGAAGCT
ampseqF-pl1-bcE10-mutreg4_F	GGCTGTGAGAGAGCTCAGGTACAGGCAACTTCTTAGCCGCCGAAGCT
ampseqF-pl1-bcF10-mutreg4_F	GGCTGTGAGAGAGCTCAGCCTAGACAGTAATCTTAGCCGCCGAAGCT
ampseqF-pl1-bcG10-mutreg4_F	GGCTGTGAGAGAGCTCAGATTGCTATAGCATCTTAGCCGCCGAAGCT
ampseqF-pl1-bcH10-mutreg4_F	GGCTGTGAGAGAGCTCAGAACACTCTTAGGTCTTAGCCGCCGAAGCT
ampseqF-pl1-bcA11-mutreg4_F	GGCTGTGAGAGAGCTCAGTTGCGAATCTTGTCTTAGCCGCCGAAGCT
ampseqF-pl1-bcB11-mutreg4_F	GGCTGTGAGAGAGCTCAGTCGTCCACTATATCTTAGCCGCCGAAGCT
ampseqF-pl1-bcC11-mutreg4_F	GGCTGTGAGAGAGCTCAGACCTTCACAATGTCTTAGCCGCCGAAGCT
ampseqF-pl1-bcD11-mutreg4_F	GGCTGTGAGAGAGCTCAGTAAGCCTATAACTCTTAGCCGCCGAAGCT
ampseqF-pl1-bcE11-mutreg4_F	GGCTGTGAGAGAGCTCAGGCCTCAAGGATTTCTTAGCCGCCGAAGCT
ampseqF-pl1-bcF11-mutreg4_F	GGCTGTGAGAGAGCTCAGACCAAGAACTGCTCTTAGCCGCCGAAGCT
ampseqF-pl1-bcG11-mutreg4_F	GGCTGTGAGAGAGCTCAGGATGTGTCATAATCTTAGCCGCCGAAGCT
ampseqF-pl1-bcH11-mutreg4_F	GGCTGTGAGAGAGCTCAGGGAAGACGCGATTCTTAGCCGCCGAAGCT
ampseqF-pl1-bcA12-mutreg4_F	GGCTGTGAGAGAGCTCAGATGGCGCTCCTGTCTTAGCCGCCGAAGCT
ampseqF-pl1-bcB12-mutreg4_F	GGCTGTGAGAGAGCTCAGCGTCTGAGTTACTCTTAGCCGCCGAAGCT
ampseqF-pl1-bcC12-mutreg4_F	GGCTGTGAGAGAGCTCAGATACGCCTAACTTCTTAGCCGCCGAAGCT
ampseqF-pl1-bcD12-mutreg4_F	GGCTGTGAGAGAGCTCAGCTCCAGTTAGTGTCTTAGCCGCCGAAGCT
ampseqF-pl1-bcE12-mutreg4_F	GGCTGTGAGAGAGCTCAGTGGTCGATTCGCTCTTAGCCGCCGAAGCT
ampseqF-pl1-bcF12-mutreg4_F	GGCTGTGAGAGAGCTCAGATGGATTGCCAGTCTTAGCCGCCGAAGCT
ampseqF-pl1-bcG12-mutreg4_F	GGCTGTGAGAGAGCTCAGATACTGCAGGCATCTTAGCCGCCGAAGCT
ampseqF-pl1-bcH12-mutreg4_F	GGCTGTGAGAGAGCTCAGGCACTCATACCATCTTAGCCGCCGAAGCT
ampseqF-pl2-bcA1-mutreg4_F	GGCTGTGAGAGAGCTCAGCGCAATGACATTTCTTAGCCGCCGAAGCT
ampseqF-pl2-bcB1-mutreg4_F	GGCTGTGAGAGAGCTCAGCCTCCACAGTTATCTTAGCCGCCGAAGCT
ampseqF-pl2-bcC1-mutreg4_F	GGCTGTGAGAGAGCTCAGTGAACACCTTCATCTTAGCCGCCGAAGCT
ampseqF-pl2-bcD1-mutreg4_F	GGCTGTGAGAGAGCTCAGGATAACTCACTTTCTTAGCCGCCGAAGCT
ampseqF-pl2-bcE1-mutreg4_F	GGCTGTGAGAGAGCTCAGCCATGCATACTATCTTAGCCGCCGAAGCT
ampseqF-pl2-bcF1-mutreg4_F	GGCTGTGAGAGAGCTCAGGCGTCTACACAGTCTTAGCCGCCGAAGCT
ampseqF-pl2-bcG1-mutreg4_F	GGCTGTGAGAGAGCTCAGGTTAATCCTATCTCTTAGCCGCCGAAGCT
ampseqF-pl2-bcH1-mutreg4_F	GGCTGTGAGAGAGCTCAGGTTGTCTGCACTTCTTAGCCGCCGAAGCT
ampseqF-pl2-bcA2-mutreg4_F	GGCTGTGAGAGAGCTCAGTAGCATACCTTGTCTTAGCCGCCGAAGCT
ampseqF-pl2-bcB2-mutreg4_F	GGCTGTGAGAGAGCTCAGTTACACGAGCATTCTTAGCCGCCGAAGCT
ampseqF-pl2-bcC2-mutreg4_F	GGCTGTGAGAGAGCTCAGTCTGGTCGCTCATCTTAGCCGCCGAAGCT
ampseqF-pl2-bcD2-mutreg4_F	GGCTGTGAGAGAGCTCAGGGCCTGACTATATCTTAGCCGCCGAAGCT
ampseqF-pl2-bcE2-mutreg4_F	GGCTGTGAGAGAGCTCAGTACTGCTAGGCGTCTTAGCCGCCGAAGCT
ampseqF-pl2-bcF2-mutreg4_F	GGCTGTGAGAGAGCTCAGAGGTCAAGGTGTTCTTAGCCGCCGAAGCT
ampseqF-pl2-bcG2-mutreg4_F	GGCTGTGAGAGAGCTCAGCAGGTCGTAAGCTCTTAGCCGCCGAAGCT
ampseqF-pl2-bcH2-mutreg4_F	GGCTGTGAGAGAGCTCAGTGGCGCTGTGCATCTTAGCCGCCGAAGCT
ampseqF-pl2-bcA3-mutreg4_F	GGCTGTGAGAGAGCTCAGCAGTGTACTGTGTCTTAGCCGCCGAAGCT
ampseqF-pl2-bcB3-mutreg4_F	GGCTGTGAGAGAGCTCAGGCTGCAATGCCTTCTTAGCCGCCGAAGCT
ampseqF-pl2-bcC3-mutreg4_F	GGCTGTGAGAGAGCTCAGAGAGCGTGCCACTCTTAGCCGCCGAAGCT
ampseqF-pl2-bcD3-mutreg4_F	GGCTGTGAGAGAGCTCAGTATCGCACGCCTTCTTAGCCGCCGAAGCT
ampseqF-pl2-bcE3-mutreg4_F	GGCTGTGAGAGAGCTCAGCTGATGTTCGCGTCTTAGCCGCCGAAGCT
ampseqF-pl2-bcF3-mutreg4_F	GGCTGTGAGAGAGCTCAGAGCCACGTTACGTCTTAGCCGCCGAAGCT
ampseqF-pl2-bcG3-mutreg4_F	GGCTGTGAGAGAGCTCAGAGGAGACGTTGTTCTTAGCCGCCGAAGCT
ampseqF-pl2-bcH3-mutreg4_F	GGCTGTGAGAGAGCTCAGCAGGTTCTTACTTCTTAGCCGCCGAAGCT
ampseqF-pl2-bcA4-mutreg4_F	GGCTGTGAGAGAGCTCAGCACTGCAATGCTTCTTAGCCGCCGAAGCT
ampseqF-pl2-bcB4-mutreg4_F	GGCTGTGAGAGAGCTCAGCAAGAGACGCGTTCTTAGCCGCCGAAGCT
ampseqF-pl2-bcC4-mutreg4_F	GGCTGTGAGAGAGCTCAGGCAGTAAGCTAGTCTTAGCCGCCGAAGCT
ampseqF-pl2-bcD4-mutreg4_F	GGCTGTGAGAGAGCTCAGCAATGGCAGTTGTCTTAGCCGCCGAAGCT
ampseqF-pl2-bcE4-mutreg4_F	GGCTGTGAGAGAGCTCAGCAATATGCAAGTTCTTAGCCGCCGAAGCT
ampseqF-pl2-bcF4-mutreg4_F	GGCTGTGAGAGAGCTCAGCATGCTTAGGTTTCTTAGCCGCCGAAGCT
ampseqF-pl2-bcG4-mutreg4_F	GGCTGTGAGAGAGCTCAGTAAGCACGCGCTTCTTAGCCGCCGAAGCT
ampseqF-pl2-bcH4-mutreg4_F	GGCTGTGAGAGAGCTCAGATGAACTCTTCCTCTTAGCCGCCGAAGCT
ampseqF-pl2-bcA5-mutreg4_F	GGCTGTGAGAGAGCTCAGTGACAGATTCTATCTTAGCCGCCGAAGCT
ampseqF-pl2-bcB5-mutreg4_F	GGCTGTGAGAGAGCTCAGATGCCACTAAGTTCTTAGCCGCCGAAGCT
ampseqF-pl2-bcC5-mutreg4_F	GGCTGTGAGAGAGCTCAGTCATTGAGCACCTCTTAGCCGCCGAAGCT
ampseqF-pl2-bcD5-mutreg4_F	GGCTGTGAGAGAGCTCAGTCTAAGAGCCTATCTTAGCCGCCGAAGCT
ampseqF-pl2-bcE5-mutreg4_F	GGCTGTGAGAGAGCTCAGGTCTCAACTTGGTCTTAGCCGCCGAAGCT
ampseqF-pl2-bcF5-mutreg4_F	GGCTGTGAGAGAGCTCAGGAAGTCAGTACGTCTTAGCCGCCGAAGCT
ampseqF-pl2-bcG5-mutreg4_F	GGCTGTGAGAGAGCTCAGTGTATGTCACGCTCTTAGCCGCCGAAGCT
ampseqF-pl2-bcH5-mutreg4_F	GGCTGTGAGAGAGCTCAGCTGACCAATTGTTCTTAGCCGCCGAAGCT
ampseqF-pl2-bcA6-mutreg4_F	GGCTGTGAGAGAGCTCAGTCGCGTCACATATCTTAGCCGCCGAAGCT
ampseqF-pl2-bcB6-mutreg4_F	GGCTGTGAGAGAGCTCAGAATAAGTCTGAGTCTTAGCCGCCGAAGCT
ampseqF-pl2-bcC6-mutreg4_F	GGCTGTGAGAGAGCTCAGGCATCCACTTATTCTTAGCCGCCGAAGCT
ampseqF-pl2-bcD6-mutreg4_F	GGCTGTGAGAGAGCTCAGCGTCCTAGGACATCTTAGCCGCCGAAGCT
ampseqF-pl2-bcE6-mutreg4_F	GGCTGTGAGAGAGCTCAGTAGGTAAGACCTTCTTAGCCGCCGAAGCT
ampseqF-pl2-bcF6-mutreg4_F	GGCTGTGAGAGAGCTCAGGTGTCGTGTACTTCTTAGCCGCCGAAGCT
ampseqF-pl2-bcG6-mutreg4_F	GGCTGTGAGAGAGCTCAGTGACTTAGATTCTCTTAGCCGCCGAAGCT
ampseqF-pl2-bcH6-mutreg4_F	GGCTGTGAGAGAGCTCAGTGGCTCACTTCTTCTTAGCCGCCGAAGCT
ampseqF-pl2-bcA7-mutreg4_F	GGCTGTGAGAGAGCTCAGTGTGGAAGTACGTCTTAGCCGCCGAAGCT
ampseqF-pl2-bcB7-mutreg4_F	GGCTGTGAGAGAGCTCAGCGTCTCGTCATATCTTAGCCGCCGAAGCT
ampseqF-pl2-bcC7-mutreg4_F	GGCTGTGAGAGAGCTCAGGCTAGTGTAGTGTCTTAGCCGCCGAAGCT
ampseqF-pl2-bcD7-mutreg4_F	GGCTGTGAGAGAGCTCAGAGTTGGTCACTTTCTTAGCCGCCGAAGCT
ampseqF-pl2-bcE7-mutreg4_F	GGCTGTGAGAGAGCTCAGAGTTCAGAGCAGTCTTAGCCGCCGAAGCT
ampseqF-pl2-bcF7-mutreg4_F	GGCTGTGAGAGAGCTCAGGCGTCGCCAGCGTCTTAGCCGCCGAAGCT
ampseqF-pl2-bcG7-mutreg4_F	GGCTGTGAGAGAGCTCAGCAGGTCACTAACTCTTAGCCGCCGAAGCT
ampseqF-pl2-bcH7-mutreg4_F	GGCTGTGAGAGAGCTCAGAGATATCAGTGTTCTTAGCCGCCGAAGCT
ampseqF-pl2-bcA8-mutreg4_F	GGCTGTGAGAGAGCTCAGCTGCTTGTCTCATCTTAGCCGCCGAAGCT
ampseqF-pl2-bcB8-mutreg4_F	GGCTGTGAGAGAGCTCAGGACTTAGAATGTTCTTAGCCGCCGAAGCT
ampseqF-pl2-bcC8-mutreg4_F	GGCTGTGAGAGAGCTCAGGACAAGCACATCTCTTAGCCGCCGAAGCT
ampseqF-pl2-bcD8-mutreg4_F	GGCTGTGAGAGAGCTCAGCACTTACCATGTTCTTAGCCGCCGAAGCT
ampseqF-pl2-bcE8-mutreg4_F	GGCTGTGAGAGAGCTCAGTAACCTGATACATCTTAGCCGCCGAAGCT
ampseqF-pl2-bcF8-mutreg4_F	GGCTGTGAGAGAGCTCAGTCTCTATGACTATCTTAGCCGCCGAAGCT
ampseqF-pl2-bcG8-mutreg4_F	GGCTGTGAGAGAGCTCAGTAGCCTTGCACATCTTAGCCGCCGAAGCT
ampseqF-pl2-bcH8-mutreg4_F	GGCTGTGAGAGAGCTCAGGGTCATTCGCAGTCTTAGCCGCCGAAGCT
ampseqF-pl2-bcA9-mutreg4_F	GGCTGTGAGAGAGCTCAGCAGTGAGATTCCTCTTAGCCGCCGAAGCT
ampseqF-pl2-bcB9-mutreg4_F	GGCTGTGAGAGAGCTCAGTATATGACTACATCTTAGCCGCCGAAGCT
ampseqF-pl2-bcC9-mutreg4_F	GGCTGTGAGAGAGCTCAGCTGCCAGTGGTATCTTAGCCGCCGAAGCT
ampseqF-pl2-bcD9-mutreg4_F	GGCTGTGAGAGAGCTCAGCCTCATATACGTTCTTAGCCGCCGAAGCT
ampseqF-pl2-bcE9-mutreg4_F	GGCTGTGAGAGAGCTCAGACACGTGTGACGTCTTAGCCGCCGAAGCT
ampseqF-pl2-bcF9-mutreg4_F	GGCTGTGAGAGAGCTCAGGAGAACGTTCAATCTTAGCCGCCGAAGCT
ampseqF-pl2-bcG9-mutreg4_F	GGCTGTGAGAGAGCTCAGATATAACGCTAGTCTTAGCCGCCGAAGCT
ampseqF-pl2-bcH9-mutreg4_F	GGCTGTGAGAGAGCTCAGGATACCTTAGCTTCTTAGCCGCCGAAGCT
ampseqF-pl2-bcA10-mutreg4_F	GGCTGTGAGAGAGCTCAGTGAGCTCGCAACTCTTAGCCGCCGAAGCT
ampseqF-pl2-bcB10-mutreg4_F	GGCTGTGAGAGAGCTCAGGTCTGGTAGAGCTCTTAGCCGCCGAAGCT
ampseqF-pl2-bcC10-mutreg4_F	GGCTGTGAGAGAGCTCAGAAGCGATATGAGTCTTAGCCGCCGAAGCT
ampseqF-pl2-bcD10-mutreg4_F	GGCTGTGAGAGAGCTCAGTATTCGTACATGTCTTAGCCGCCGAAGCT
ampseqF-pl2-bcE10-mutreg4_F	GGCTGTGAGAGAGCTCAGGATGTGCCAACCTCTTAGCCGCCGAAGCT
ampseqF-pl2-bcF10-mutreg4_F	GGCTGTGAGAGAGCTCAGTATGGCACATCGTCTTAGCCGCCGAAGCT
ampseqF-pl2-bcG10-mutreg4_F	GGCTGTGAGAGAGCTCAGTTCTACTGGTACTCTTAGCCGCCGAAGCT
ampseqF-pl2-bcH10-mutreg4_F	GGCTGTGAGAGAGCTCAGACTACCAGCGAGTCTTAGCCGCCGAAGCT
ampseqF-pl2-bcA11-mutreg4_F	GGCTGTGAGAGAGCTCAGCAACGTCATACATCTTAGCCGCCGAAGCT
ampseqF-pl2-bcB11-mutreg4_F	GGCTGTGAGAGAGCTCAGTTCAGGAATAGCTCTTAGCCGCCGAAGCT
ampseqF-pl2-bcC11-mutreg4_F	GGCTGTGAGAGAGCTCAGCCAAGTGGAACCTCTTAGCCGCCGAAGCT
ampseqF-pl2-bcD11-mutreg4_F	GGCTGTGAGAGAGCTCAGTACCTGCATATCTCTTAGCCGCCGAAGCT
ampseqF-pl2-bcE11-mutreg4_F	GGCTGTGAGAGAGCTCAGTCATGTGTCTCCTCTTAGCCGCCGAAGCT
ampseqF-pl2-bcF11-mutreg4_F	GGCTGTGAGAGAGCTCAGCAATTGCGTGGTTCTTAGCCGCCGAAGCT
ampseqF-pl2-bcG11-mutreg4_F	GGCTGTGAGAGAGCTCAGTTACGTGCTAGTTCTTAGCCGCCGAAGCT
ampseqF-pl2-bcH11-mutreg4_F	GGCTGTGAGAGAGCTCAGTGTACTAGCATTTCTTAGCCGCCGAAGCT
ampseqF-pl2-bcA12-mutreg4_F	GGCTGTGAGAGAGCTCAGACAATCGCTGTGTCTTAGCCGCCGAAGCT
ampseqF-pl2-bcB12-mutreg4_F	GGCTGTGAGAGAGCTCAGGTCCACATGATTTCTTAGCCGCCGAAGCT
ampseqF-pl2-bcC12-mutreg4_F	GGCTGTGAGAGAGCTCAGTTCTACGCTCGTTCTTAGCCGCCGAAGCT
ampseqF-pl2-bcD12-mutreg4_F	GGCTGTGAGAGAGCTCAGGAGTCGACTACGTCTTAGCCGCCGAAGCT
ampseqF-pl2-bcE12-mutreg4_F	GGCTGTGAGAGAGCTCAGCAGTGAACGAGGTCTTAGCCGCCGAAGCT
ampseqF-pl2-bcF12-mutreg4_F	GGCTGTGAGAGAGCTCAGCATTGTAATTACTCTTAGCCGCCGAAGCT
ampseqF-pl2-bcG12-mutreg4_F	GGCTGTGAGAGAGCTCAGATGCAATCCTTCTCTTAGCCGCCGAAGCT
ampseqF-pl2-bcH12-mutreg4_F	GGCTGTGAGAGAGCTCAGAGACTAGTTCGCTCTTAGCCGCCGAAGCT

## Sheet: Rgt1 10 aa deletions
name	sequence
Rgt1_271-300_brF	GTTCCTTTGAAAAGGGGACCCTCGAAAGGCAACGAAATACAAGACCACAATAACTCAAGG
Rgt1_301-330_brF	TATACGAGGAGCACCAGCCATCCAAGGACTTCGTATAATACGTTTGATAATAGTAACAAT
Rgt1_331-360_brF	AACGAAATACAAGACCACAATAACTCAAGGACCCTGAATAATAATACGGGCAATAGCGGC
Rgt1_361-390_brF	TCGTATAATACGTTTGATAATAGTAACAATGACAACGGTATAAACAGTAACACAGTTCCA
Rgt1_391-420_brF	ACCCTGAATAATAATACGGGCAATAGCGGCAGTACCCCTTCGAGATCTAATTCAGTTTTA
Rgt1_421-450_brF	GACAACGGTATAAACAGTAACACAGTTCCATTGCCCCCACTGACACAGTACATTCCCCAG
Rgt1_451-480_brF	AGTACCCCTTCGAGATCTAATTCAGTTTTAGCTGGTGGCATTCCTCCTAGTTTCCAAAAT
Rgt1_481-510_brF	TTGCCCCCACTGACACAGTACATTCCCCAGCCAGCGATACAATCAACTATGCCCGCGGGT
Rgt1_511-540_brF	GCTGGTGGCATTCCTCCTAGTTTCCAAAATAATATTGGCCAACAGCAGTTTTGGAAAGTG
Rgt1_541-570_brF	CCAGCGATACAATCAACTATGCCCGCGGGTCCCTACCATGAGTTTCAACACCAAAGAAAA
Rgt1_571-600_brF	AATATTGGCCAACAGCAGTTTTGGAAAGTGGGATCTATCGATTCTTTGCAAAGTGATATA
Rgt1_601-630_brF	CCCTACCATGAGTTTCAACACCAAAGAAAATCGGTAAGAACATTAAATCCCAACGAGCAG
Rgt1_631-660_brF	GGATCTATCGATTCTTTGCAAAGTGATATATTGTCTTATAACACCGTTCAACAGTCTCCC
Rgt1_661-690_brF	TCGGTAAGAACATTAAATCCCAACGAGCAGATAACGAATAAACATACTAATGATTCTGGA
Rgt1_691-720_brF	TTGTCTTATAACACCGTTCAACAGTCTCCCAATGCAAACGGAAGTGTCACCGGCTCAGGC
Rgt1_721-750_brF	ATAACGAATAAACATACTAATGATTCTGGAAGTGCCTCTGGTAGTGGTGGTTATTGGTCC
Rgt1_751-780_brF	AATGCAAACGGAAGTGTCACCGGCTCAGGCTTTATAAGAACTTCTGGTTTACTAGCTCCT
Rgt1_781-810_brF	AGTGCCTCTGGTAGTGGTGGTTATTGGTCCACTGATGATCATAATGGGGAACAGACAAGA
Rgt1_811-840_brF	TTTATAAGAACTTCTGGTTTACTAGCTCCTAGATCAAGTTCCATACCTTCTTTGCTACGA
Rgt1_841-870_brF	ACTGATGATCATAATGGGGAACAGACAAGAAATACTTCAAATTCTCTTTTACTAGGTGGC
Rgt1_871-900_brF	AGATCAAGTTCCATACCTTCTTTGCTACGACAGCCTCAGCTTCCCCCACCTCAGCAACAA
Rgt1_901-930_brF	AATACTTCAAATTCTCTTTTACTAGGTGGCTCGCAGCCACAAGCACACCAACAAAAGTTG
Rgt1_931-960_brF	CAGCCTCAGCTTCCCCCACCTCAGCAACAACAACAAGGACAGAACCTATACTCGTATTCT
Rgt1_961-990_brF	TCGCAGCCACAAGCACACCAACAAAAGTTGCAATTTTCCCAGCAGCAACCGTACAACCCA
Rgt1_991-1020_brF	CAACAAGGACAGAACCTATACTCGTATTCTTCGATATCATCTTTTGGCCAGTTCGCTGCT
Rgt1_1021-1050_brF	CAATTTTCCCAGCAGCAACCGTACAACCCAAATGGTTTTCATTCTAGACAAGGATCAGTC
Rgt1_1051-1080_brF	TCGATATCATCTTTTGGCCAGTTCGCTGCTGCCAGCGAGGCTATGTCTCCCAGTGCACCT
Rgt1_1081-1110_brF	AATGGTTTTCATTCTAGACAAGGATCAGTCGCCATGTTTACTAGCACATCTACAAACCCC
Rgt1_1111-1140_brF	GCCAGCGAGGCTATGTCTCCCAGTGCACCTGTAAATGTTGCACAGCAAACACAAAGACCT
Rgt1_1141-1170_brF	GCCATGTTTACTAGCACATCTACAAACCCCCAAGGACAGCAGGTACCGCAATTTTCATCT
Rgt1_1171-1200_brF	GTAAATGTTGCACAGCAAACACAAAGACCTGAGTTGGATGGAAATAAAAGGCGACAATCA
Rgt1_1201-1230_brF	CAAGGACAGCAGGTACCGCAATTTTCATCTGCCCCCGTATCAGTAACATTATCCACGGAC
Rgt1_1231-1260_brF	GAGTTGGATGGAAATAAAAGGCGACAATCAAGGCTGAATGGTAATGAGAATAATAATGGT
Rgt1_1261-1290_brF	GCCCCCGTATCAGTAACATTATCCACGGACGAAATTAACAACAATAATGGCAGCAATAAT
Rgt1_1291-1320_brF	AGGCTGAATGGTAATGAGAATAATAATGGTAGCGGTTCTTCTAAGGATACATCTCAACAT
Rgt1_1321-1350_brF	GAAATTAACAACAATAATGGCAGCAATAATTCCCAAGAATCTGTAACTACACCAGCGGCT
Rgt1_1351-1380_brF	AGCGGTTCTTCTAAGGATACATCTCAACATTTGGAAGCATCCAGCCCTGGATCAACGCCA
Rgt1_1381-1410_brF	TCCCAAGAATCTGTAACTACACCAGCGGCTCAGAGAAGTACAAAAAAACGCAGAAAAAGT
Rgt1_1411-1440_brF	TTGGAAGCATCCAGCCCTGGATCAACGCCATACGTATCTAAGAAGACAAAACCAAAGAGA
Rgt1_1441-1470_brF	CAGAGAAGTACAAAAAAACGCAGAAAAAGTGATTCATCTATATCTATAACATCGAAAGAT
Rgt1_1471-1500_brF	TACGTATCTAAGAAGACAAAACCAAAGAGATCTGCTCACCCAATGACCACTTCATCAACT
Rgt1_1501-1530_brF	GATTCATCTATATCTATAACATCGAAAGATATCGCGTATGGACAGATATCCGATGTAGAT
Rgt1_1531-1560_brF	TCTGCTCACCCAATGACCACTTCATCAACTCTAATAGACACCTACTATGAGTTCATACAT
Rgt1_1561-1590_brF	ATCGCGTATGGACAGATATCCGATGTAGATGTAGGATTTCCGATCATACCTTTAAACAAA
Rgt1_1591-1620_brF	CTAATAGACACCTACTATGAGTTCATACATACGACCTTGACCAGTGACTTATTGTTAGTT
Rgt1_1621-1650_brF	GTAGGATTTCCGATCATACCTTTAAACAAAAACACACAGCCAATTTCCAATATACACGAA
Rgt1_1651-1680_brF	ACGACCTTGACCAGTGACTTATTGTTAGTTGTCAATTCATATGTTATTTTGTGGTTTAGA
Rgt1_1681-1710_brF	AACACACAGCCAATTTCCAATATACACGAAAATTCATTGGAATTGTTAGTTCGTGTTGCT
Rgt1_1711-1740_brF	GTCAATTCATATGTTATTTTGTGGTTTAGACTGAAACAAAAGCCAGGTGGCAAGTTTTTC
Rgt1_1741-1770_brF	AATTCATTGGAATTGTTAGTTCGTGTTGCTGATAATATTGTTGGCGTGGCTTTGTCGCCA
Rgt1_1771-1800_brF	CTGAAACAAAAGCCAGGTGGCAAGTTTTTCAGTAATGACAACAACAAAGCTGGGTTCACT
Rgt1_1801-1830_brF	GATAATATTGTTGGCGTGGCTTTGTCGCCAACAGCCACGGCAAGGGATGATGCTGAAAAA
Rgt1_1831-1860_brF	AGTAATGACAACAACAAAGCTGGGTTCACTACAAGACGTGATTCACATAATGAAGTACAG
Rgt1_1861-1890_brF	ACAGCCACGGCAAGGGATGATGCTGAAAAAGATACTTTGGAAGTGCAAAGCGTTTTTATT
Rgt1_1891-1920_brF	ACAAGACGTGATTCACATAATGAAGTACAGGCCGCCCTCAATGAATGTTTCCAAAAAATC
Rgt1_1921-1950_brF	GATACTTTGGAAGTGCAAAGCGTTTTTATTGTGGATATTCATCCCAAATTCAGAGAAAAC
Rgt1_1951-1980_brF	GCCGCCCTCAATGAATGTTTCCAAAAAATCAACGACCAAATTTCGCCGAAGATCAAAGTC
Rgt1_1981-2010_brF	GTGGATATTCATCCCAAATTCAGAGAAAACATTTATTTATCTACTTTTATTCTTTTAAAT
Rgt1_2011-2040_brF	AACGACCAAATTTCGCCGAAGATCAAAGTCTACATTTTGGCATTTGTTGGATACGATAAC
Rgt1_2041-2070_brF	ATTTATTTATCTACTTTTATTCTTTTAAATTCATTTGTACTTGGAATGTCGGTGACAATT
Rgt1_2071-2100_brF	TACATTTTGGCATTTGTTGGATACGATAACTTTAACGAATTTAAATTATACAAACTTCTA
Rgt1_2101-2130_brF	TCATTTGTACTTGGAATGTCGGTGACAATTTTATTTCCGGAGCCGGATATAAATGATGTG
Rgt1_2131-2160_brF	TTTAACGAATTTAAATTATACAAACTTCTAAAGCCTCCAGTTGATGAAGAGGTCAGCACT
Rgt1_2161-2190_brF	TTATTTCCGGAGCCGGATATAAATGATGTGGGTAATGGGAATACAAAAACGTCCGAATTT
Rgt1_2191-2220_brF	AAGCCTCCAGTTGATGAAGAGGTCAGCACTGAAATTGGATCTGAAAGTGCTGGGCATATG
Rgt1_2221-2250_brF	GGTAATGGGAATACAAAAACGTCCGAATTTAATCCATCCAATTCACCAAATTCCATGGAC
Rgt1_2251-2280_brF	GAAATTGGATCTGAAAGTGCTGGGCATATGGAAAACATTAGTCACTATTCAGTGTTGTTT
Rgt1_2281-2310_brF	AATCCATCCAATTCACCAAATTCCATGGACAAAAGATTATACGTTTTGCTTTCAGTGTTT
Rgt1_2311-2340_brF	GAAAACATTAGTCACTATTCAGTGTTGTTTGATTCTTTACAAAGCTGTGCATTCGGTGGT
Rgt1_2341-2370_brF	AAAAGATTATACGTTTTGCTTTCAGTGTTTCCCAAGCTATTAAACATTTCCATCCAAGGT
Rgt1_2371-2400_brF	GATTCTTTACAAAGCTGTGCATTCGGTGGTTCTACAGAAAGATTTTTTTCTAATGATTTG
Rgt1_2401-2430_brF	CCCAAGCTATTAAACATTTCCATCCAAGGTGGCTCAAAATGGTGCCTGGAACAAAGCCAA
Rgt1_2431-2460_brF	TCTACAGAAAGATTTTTTTCTAATGATTTGTTGAGACTGAAAAGCGTCTTGCAAAGCTTG
Rgt1_2461-2490_brF	GGCTCAAAATGGTGCCTGGAACAAAGCCAAAAATTGGGTGAATTGATGAGTGAGCTTACC
Rgt1_2491-2520_brF	TTGAGACTGAAAAGCGTCTTGCAAAGCTTGAGGAATAGAATATCAATGAACGGCAATAGG
Rgt1_2521-2550_brF	AAATTGGGTGAATTGATGAGTGAGCTTACCAAGCCTGGGTTCGATATTACGAACTCGTCT
Rgt1_2551-2580_brF	AGGAATAGAATATCAATGAACGGCAATAGGTCACTCTTATCGGAATATGTGGAAACTCAA
Rgt1_2581-2610_brF	AAGCCTGGGTTCGATATTACGAACTCGTCTCCTCTATCCGTAGCACAGTTATTTTGCAAG
Rgt1_2611-2640_brF	TCACTCTTATCGGAATATGTGGAAACTCAACTATTAATTGGCAAACACAATTTCATCAAT
Rgt1_2641-2670_brF	CCTCTATCCGTAGCACAGTTATTTTGCAAGTGCTTATTATCATTATACGATTCAGAAGCA
Rgt1_2671-2700_brF	CTATTAATTGGCAAACACAATTTCATCAATGGAGTCTATTCAGATTTGACATTGGATTTG
Rgt1_2701-2730_brF	TGCTTATTATCATTATACGATTCAGAAGCAAGTTCGAAAATAGCAGACTCTCTGTGCTCA
Rgt1_2731-2760_brF	GGAGTCTATTCAGATTTGACATTGGATTTGTTGATATCAATAATTTTGCAAGTATTGACG
Rgt1_2761-2790_brF	AGTTCGAAAATAGCAGACTCTCTGTGCTCATTGATATTAAGACTGAATCCTACGAACAGT
Rgt1_2791-2820_brF	TTGATATCAATAATTTTGCAAGTATTGACGATTGATTTTAATTATAGACCACCGAACCCA
Rgt1_2821-2850_brF	TTGATATTAAGACTGAATCCTACGAACAGTCCCGCTAATAATCCGACAGTGCAAGAGGGC
Rgt1_2851-2880_brF	ATTGATTTTAATTATAGACCACCGAACCCACCATCTGCTATGGGCTCGTCTCCAGTCGCT
Rgt1_2881-2910_brF	CCCGCTAATAATCCGACAGTGCAAGAGGGCGGGAACCTTAGCGCTGCACCTCCATCGGAG
Rgt1_2911-2940_brF	CCATCTGCTATGGGCTCGTCTCCAGTCGCTGGGAATCCAGATTTTTACAAGAAATTACTA
Rgt1_2941-2970_brF	GGGAACCTTAGCGCTGCACCTCCATCGGAGGGCCTGAAACAAGACACTGGCACTATCCTT
Rgt1_2971-3000_brF	GGGAATCCAGATTTTTACAAGAAATTACTATCAGACCTTTGCCGGGGGATAATTTCCCCC
Rgt1_3001-3030_brF	GGCCTGAAACAAGACACTGGCACTATCCTTTTTGCTATTGCTATCCTGCACGAGGTCTAC
Rgt1_3031-3060_brF	TCAGACCTTTGCCGGGGGATAATTTCCCCCAACATCACTGAACTGGTCAAGCAGATGCCT
Rgt1_3061-3090_brF	TTTGCTATTGCTATCCTGCACGAGGTCTACACATCACTCATTAGCATTATGATGACGGCA
Rgt1_3091-3120_brF	AACATCACTGAACTGGTCAAGCAGATGCCTACTACAACGCAGAATACTCAGGACACCAAG
Rgt1_3121-3150_brF	ACATCACTCATTAGCATTATGATGACGGCAAAGTCGCAGGACCTGGTCATGAAGCTGTCA
Rgt1_271-300_rv	GCCTTTCGAGGGTCCCCTTTTCAAAGGAAC
Rgt1_301-330_rv	AGTCCTTGGATGGCTGGTGCTCCTCGTATA
Rgt1_331-360_rv	CCTTGAGTTATTGTGGTCTTGTATTTCGTT
Rgt1_361-390_rv	ATTGTTACTATTATCAAACGTATTATACGA
Rgt1_391-420_rv	GCCGCTATTGCCCGTATTATTATTCAGGGT
Rgt1_421-450_rv	TGGAACTGTGTTACTGTTTATACCGTTGTC
Rgt1_451-480_rv	TAAAACTGAATTAGATCTCGAAGGGGTACT
Rgt1_481-510_rv	CTGGGGAATGTACTGTGTCAGTGGGGGCAA
Rgt1_511-540_rv	ATTTTGGAAACTAGGAGGAATGCCACCAGC
Rgt1_541-570_rv	ACCCGCGGGCATAGTTGATTGTATCGCTGG
Rgt1_571-600_rv	CACTTTCCAAAACTGCTGTTGGCCAATATT
Rgt1_601-630_rv	TTTTCTTTGGTGTTGAAACTCATGGTAGGG
Rgt1_631-660_rv	TATATCACTTTGCAAAGAATCGATAGATCC
Rgt1_661-690_rv	CTGCTCGTTGGGATTTAATGTTCTTACCGA
Rgt1_691-720_rv	GGGAGACTGTTGAACGGTGTTATAAGACAA
Rgt1_721-750_rv	TCCAGAATCATTAGTATGTTTATTCGTTAT
Rgt1_751-780_rv	GCCTGAGCCGGTGACACTTCCGTTTGCATT
Rgt1_781-810_rv	GGACCAATAACCACCACTACCAGAGGCACT
Rgt1_811-840_rv	AGGAGCTAGTAAACCAGAAGTTCTTATAAA
Rgt1_841-870_rv	TCTTGTCTGTTCCCCATTATGATCATCAGT
Rgt1_871-900_rv	TCGTAGCAAAGAAGGTATGGAACTTGATCT
Rgt1_901-930_rv	GCCACCTAGTAAAAGAGAATTTGAAGTATT
Rgt1_931-960_rv	TTGTTGCTGAGGTGGGGGAAGCTGAGGCTG
Rgt1_961-990_rv	CAACTTTTGTTGGTGTGCTTGTGGCTGCGA
Rgt1_991-1020_rv	AGAATACGAGTATAGGTTCTGTCCTTGTTG
Rgt1_1021-1050_rv	TGGGTTGTACGGTTGCTGCTGGGAAAATTG
Rgt1_1051-1080_rv	AGCAGCGAACTGGCCAAAAGATGATATCGA
Rgt1_1081-1110_rv	GACTGATCCTTGTCTAGAATGAAAACCATT
Rgt1_1111-1140_rv	AGGTGCACTGGGAGACATAGCCTCGCTGGC
Rgt1_1141-1170_rv	GGGGTTTGTAGATGTGCTAGTAAACATGGC
Rgt1_1171-1200_rv	AGGTCTTTGTGTTTGCTGTGCAACATTTAC
Rgt1_1201-1230_rv	AGATGAAAATTGCGGTACCTGCTGTCCTTG
Rgt1_1231-1260_rv	TGATTGTCGCCTTTTATTTCCATCCAACTC
Rgt1_1261-1290_rv	GTCCGTGGATAATGTTACTGATACGGGGGC
Rgt1_1291-1320_rv	ACCATTATTATTCTCATTACCATTCAGCCT
Rgt1_1321-1350_rv	ATTATTGCTGCCATTATTGTTGTTAATTTC
Rgt1_1351-1380_rv	ATGTTGAGATGTATCCTTAGAAGAACCGCT
Rgt1_1381-1410_rv	AGCCGCTGGTGTAGTTACAGATTCTTGGGA
Rgt1_1411-1440_rv	TGGCGTTGATCCAGGGCTGGATGCTTCCAA
Rgt1_1441-1470_rv	ACTTTTTCTGCGTTTTTTTGTACTTCTCTG
Rgt1_1471-1500_rv	TCTCTTTGGTTTTGTCTTCTTAGATACGTA
Rgt1_1501-1530_rv	ATCTTTCGATGTTATAGATATAGATGAATC
Rgt1_1531-1560_rv	AGTTGATGAAGTGGTCATTGGGTGAGCAGA
Rgt1_1561-1590_rv	ATCTACATCGGATATCTGTCCATACGCGAT
Rgt1_1591-1620_rv	ATGTATGAACTCATAGTAGGTGTCTATTAG
Rgt1_1621-1650_rv	TTTGTTTAAAGGTATGATCGGAAATCCTAC
Rgt1_1651-1680_rv	AACTAACAATAAGTCACTGGTCAAGGTCGT
Rgt1_1681-1710_rv	TTCGTGTATATTGGAAATTGGCTGTGTGTT
Rgt1_1711-1740_rv	TCTAAACCACAAAATAACATATGAATTGAC
Rgt1_1741-1770_rv	AGCAACACGAACTAACAATTCCAATGAATT
Rgt1_1771-1800_rv	GAAAAACTTGCCACCTGGCTTTTGTTTCAG
Rgt1_1801-1830_rv	TGGCGACAAAGCCACGCCAACAATATTATC
Rgt1_1831-1860_rv	AGTGAACCCAGCTTTGTTGTTGTCATTACT
Rgt1_1861-1890_rv	TTTTTCAGCATCATCCCTTGCCGTGGCTGT
Rgt1_1891-1920_rv	CTGTACTTCATTATGTGAATCACGTCTTGT
Rgt1_1921-1950_rv	AATAAAAACGCTTTGCACTTCCAAAGTATC
Rgt1_1951-1980_rv	GATTTTTTGGAAACATTCATTGAGGGCGGC
Rgt1_1981-2010_rv	GTTTTCTCTGAATTTGGGATGAATATCCAC
Rgt1_2011-2040_rv	GACTTTGATCTTCGGCGAAATTTGGTCGTT
Rgt1_2041-2070_rv	ATTTAAAAGAATAAAAGTAGATAAATAAAT
Rgt1_2071-2100_rv	GTTATCGTATCCAACAAATGCCAAAATGTA
Rgt1_2101-2130_rv	AATTGTCACCGACATTCCAAGTACAAATGA
Rgt1_2131-2160_rv	TAGAAGTTTGTATAATTTAAATTCGTTAAA
Rgt1_2161-2190_rv	CACATCATTTATATCCGGCTCCGGAAATAA
Rgt1_2191-2220_rv	AGTGCTGACCTCTTCATCAACTGGAGGCTT
Rgt1_2221-2250_rv	AAATTCGGACGTTTTTGTATTCCCATTACC
Rgt1_2251-2280_rv	CATATGCCCAGCACTTTCAGATCCAATTTC
Rgt1_2281-2310_rv	GTCCATGGAATTTGGTGAATTGGATGGATT
Rgt1_2311-2340_rv	AAACAACACTGAATAGTGACTAATGTTTTC
Rgt1_2341-2370_rv	AAACACTGAAAGCAAAACGTATAATCTTTT
Rgt1_2371-2400_rv	ACCACCGAATGCACAGCTTTGTAAAGAATC
Rgt1_2401-2430_rv	ACCTTGGATGGAAATGTTTAATAGCTTGGG
Rgt1_2431-2460_rv	CAAATCATTAGAAAAAAATCTTTCTGTAGA
Rgt1_2461-2490_rv	TTGGCTTTGTTCCAGGCACCATTTTGAGCC
Rgt1_2491-2520_rv	CAAGCTTTGCAAGACGCTTTTCAGTCTCAA
Rgt1_2521-2550_rv	GGTAAGCTCACTCATCAATTCACCCAATTT
Rgt1_2551-2580_rv	CCTATTGCCGTTCATTGATATTCTATTCCT
Rgt1_2581-2610_rv	AGACGAGTTCGTAATATCGAACCCAGGCTT
Rgt1_2611-2640_rv	TTGAGTTTCCACATATTCCGATAAGAGTGA
Rgt1_2641-2670_rv	CTTGCAAAATAACTGTGCTACGGATAGAGG
Rgt1_2671-2700_rv	ATTGATGAAATTGTGTTTGCCAATTAATAG
Rgt1_2701-2730_rv	TGCTTCTGAATCGTATAATGATAATAAGCA
Rgt1_2731-2760_rv	CAAATCCAATGTCAAATCTGAATAGACTCC
Rgt1_2761-2790_rv	TGAGCACAGAGAGTCTGCTATTTTCGAACT
Rgt1_2791-2820_rv	CGTCAATACTTGCAAAATTATTGATATCAA
Rgt1_2821-2850_rv	ACTGTTCGTAGGATTCAGTCTTAATATCAA
Rgt1_2851-2880_rv	TGGGTTCGGTGGTCTATAATTAAAATCAAT
Rgt1_2881-2910_rv	GCCCTCTTGCACTGTCGGATTATTAGCGGG
Rgt1_2911-2940_rv	AGCGACTGGAGACGAGCCCATAGCAGATGG
Rgt1_2941-2970_rv	CTCCGATGGAGGTGCAGCGCTAAGGTTCCC
Rgt1_2971-3000_rv	TAGTAATTTCTTGTAAAAATCTGGATTCCC
Rgt1_3001-3030_rv	AAGGATAGTGCCAGTGTCTTGTTTCAGGCC
Rgt1_3031-3060_rv	GGGGGAAATTATCCCCCGGCAAAGGTCTGA
Rgt1_3061-3090_rv	GTAGACCTCGTGCAGGATAGCAATAGCAAA
Rgt1_3091-3120_rv	AGGCATCTGCTTGACCAGTTCAGTGATGTT
Rgt1_3121-3150_rv	TGCCGTCATCATAATGCTAATGAGTGATGT
