# Supplementary material for: A combination of transcription factors mediates inducible interchromosomal contacts
Source: eLife journal article supplement (doi:10.7554/elife.42499), 2019-05-13
Supplement: supp [file elife-42499-supp-v1.zip › elife_poa_e42499_Supplementary_File_2.xlsx]

## Sheet: Sheet1
name	experiment	restriction enzyme	restriction enzyme amount	type	replicate	template	input DNA	round 1 PCR fw primer	round 1 PCR rv primer	round 1 PCR cycles	round 2 PCR fw primer	round 2 PCR rv primer	round 2 PCR cycles	round 3 PCR fw primer	round 3 PCR rv primer	round 3 PCR cycles	library size (bp)	sequencer	sequencing kit	sequencing date	read1 length	read2 length	index length	index2 length	seq_rd1_primer	seq_rd2_primer	seq_i_primer	seq_i2_primer
subsequences_3C_1	Subsequences	DpnII	200U	3C	1	3C DNA	50 ng	CCTACCTTTGGCAAAGGTCATG	GAAGCAGAAGAACTAGCTGTAGTCAT	32	ACGTAGGCCTAAATGGCTGTGAGAGAGCTCAGNNNNCCTACCTTTGGCAAAGGTCATG	ACCGTCGGCACTTTATCAATCTCGCTCCAAACCGAAGCAGAAGAACTAGCTGTAGTCAT	6	AATGATACGGCGACCACCGAGATCTACACACGTAGGCCTAAATGGCTGTGAGAGAGCTCAG	CAAGCAGAAGACGGCATACGAGATATCGGTGGTAGACCGTCGGCACTTTATCAATCTCGCTCCAAACC	8	308	MiSeq	600V3	2017-08-22	305	305	10	NA	ACGTAGGCCTAAATGGCTGTGAGAGAGCTCAG	GACCGTCGGCACTTTATCAATCTCGCTCCAAACC	GGTTTGGAGCGAGATTGATAAAGTGCCGACGGTC	NA
subsequences_3C_2	Subsequences	DpnII	200U	3C	2	3C DNA	50 ng	CCTACCTTTGGCAAAGGTCATG	GAAGCAGAAGAACTAGCTGTAGTCAT	32	ACGTAGGCCTAAATGGCTGTGAGAGAGCTCAGNNNNCCTACCTTTGGCAAAGGTCATG	ACCGTCGGCACTTTATCAATCTCGCTCCAAACCGAAGCAGAAGAACTAGCTGTAGTCAT	6	AATGATACGGCGACCACCGAGATCTACACACGTAGGCCTAAATGGCTGTGAGAGAGCTCAG	CAAGCAGAAGACGGCATACGAGATTGTTATGTCCGACCGTCGGCACTTTATCAATCTCGCTCCAAACC	8	308	MiSeq	600V3	2017-08-22	305	305	10	NA	ACGTAGGCCTAAATGGCTGTGAGAGAGCTCAG	GACCGTCGGCACTTTATCAATCTCGCTCCAAACC	GGTTTGGAGCGAGATTGATAAAGTGCCGACGGTC	NA
subsequences_genomic_1	Subsequences	DpnII	200U	Genomic	1	genomic DNA	50 ng	GTGAATGCTGGTCGCTATACTGGATC	GAAGCAGAAGAACTAGCTGTAGTCAT	22	ACGTAGGCCTAAATGGCTGTGAGAGAGCTCAGNNNNAATGCTGGTCGCTATACTGGATC	ACCGTCGGCACTTTATCAATCTCGCTCCAAACCGAAGCAGAAGAACTAGCTGTAGTCAT	6	AATGATACGGCGACCACCGAGATCTACACACGTAGGCCTAAATGGCTGTGAGAGAGCTCAG	CAAGCAGAAGACGGCATACGAGATACCAGAGGTCGACCGTCGGCACTTTATCAATCTCGCTCCAAACC	8	308	MiSeq	600V3	2017-08-22	305	305	10	NA	ACGTAGGCCTAAATGGCTGTGAGAGAGCTCAG	GACCGTCGGCACTTTATCAATCTCGCTCCAAACC	GGTTTGGAGCGAGATTGATAAAGTGCCGACGGTC	NA
subsequences_genomic_2	Subsequences	DpnII	200U	Genomic	2	genomic DNA	50 ng	GTGAATGCTGGTCGCTATACTGGATC	GAAGCAGAAGAACTAGCTGTAGTCAT	22	ACGTAGGCCTAAATGGCTGTGAGAGAGCTCAGNNNNAATGCTGGTCGCTATACTGGATC	ACCGTCGGCACTTTATCAATCTCGCTCCAAACCGAAGCAGAAGAACTAGCTGTAGTCAT	6	AATGATACGGCGACCACCGAGATCTACACACGTAGGCCTAAATGGCTGTGAGAGAGCTCAG	CAAGCAGAAGACGGCATACGAGATACATTGCATCGACCGTCGGCACTTTATCAATCTCGCTCCAAACC	8	308	MiSeq	600V3	2017-08-22	305	305	10	NA	ACGTAGGCCTAAATGGCTGTGAGAGAGCTCAG	GACCGTCGGCACTTTATCAATCTCGCTCCAAACC	GGTTTGGAGCGAGATTGATAAAGTGCCGACGGTC	NA
subsequences_offtarget_1	Subsequences	DpnII	200U	Off-target	1	3C DNA	50 ng	CATTGAGCCATACGAAGAGG	GAAGCAGAAGAACTAGCTGTAGTCAT	30	ACGTAGGCCTAAATGGCTGTGAGAGAGCTCAGNNNNCATTGAGCCATACGAAGAGG	ACCGTCGGCACTTTATCAATCTCGCTCCAAACCGAAGCAGAAGAACTAGCTGTAGTCAT	6	AATGATACGGCGACCACCGAGATCTACACACGTAGGCCTAAATGGCTGTGAGAGAGCTCAG	CAAGCAGAAGACGGCATACGAGATGTTCAGACACGACCGTCGGCACTTTATCAATCTCGCTCCAAACC	8	308	MiSeq	600V3	2017-08-22	305	305	10	NA	ACGTAGGCCTAAATGGCTGTGAGAGAGCTCAG	GACCGTCGGCACTTTATCAATCTCGCTCCAAACC	GGTTTGGAGCGAGATTGATAAAGTGCCGACGGTC	NA
subsequences_offtarget_2	Subsequences	DpnII	200U	Off-target	2	3C DNA	50 ng	CATTGAGCCATACGAAGAGG	GAAGCAGAAGAACTAGCTGTAGTCAT	30	ACGTAGGCCTAAATGGCTGTGAGAGAGCTCAGNNNNCATTGAGCCATACGAAGAGG	ACCGTCGGCACTTTATCAATCTCGCTCCAAACCGAAGCAGAAGAACTAGCTGTAGTCAT	6	AATGATACGGCGACCACCGAGATCTACACACGTAGGCCTAAATGGCTGTGAGAGAGCTCAG	CAAGCAGAAGACGGCATACGAGATTTGAGAGTATGACCGTCGGCACTTTATCAATCTCGCTCCAAACC	8	308	MiSeq	600V3	2017-08-22	305	305	10	NA	ACGTAGGCCTAAATGGCTGTGAGAGAGCTCAG	GACCGTCGGCACTTTATCAATCTCGCTCCAAACC	GGTTTGGAGCGAGATTGATAAAGTGCCGACGGTC	NA
error-prone_WT	Error-prone PCR	-	-	WT	1	plasmid DNA	2 ng	-	-	-	ACGTAGGCCTAAATGGCTGTGAGAGAGCTCAGNNNNTTCACCGCCTGCTATCATCC	GCACTTTATCAATCTCGCTCCAAACCGAATCGGCGGAATAACCTAACACG	5	AATGATACGGCGACCACCGAGATCTACACACGTAGGCCTAAATGGCTGTGAGAGAGCTCAG	CAAGCAGAAGACGGCATACGAGATACCAGAGGTCGACCGTCGGCACTTTATCAATCTCGCTCCAAACC	6	337	MiSeq	600V3	2017-09-26	300	300	10	NA	ACGTAGGCCTAAATGGCTGTGAGAGAGCTCAG	GACCGTCGGCACTTTATCAATCTCGCTCCAAACC	GGTTTGGAGCGAGATTGATAAAGTGCCGACGGTC	NA
error-prone_3C_1	Error-prone PCR	DpnII	200U	3C	1	3C DNA	4x50 ng	CCTACCTTTGGCAAAGGTCATG	GAATCGGCGGAATAACCTAACACG	29	ACGTAGGCCTAAATGGCTGTGAGAGAGCTCAGNNNNTTCACCGCCTGCTATCATCC	GCACTTTATCAATCTCGCTCCAAACCGAATCGGCGGAATAACCTAACACG	5	AATGATACGGCGACCACCGAGATCTACACACGTAGGCCTAAATGGCTGTGAGAGAGCTCAG	CAAGCAGAAGACGGCATACGAGATTGTTATGTCCGACCGTCGGCACTTTATCAATCTCGCTCCAAACC	6	337	MiSeq	600V3	2017-09-26	300	300	10	NA	ACGTAGGCCTAAATGGCTGTGAGAGAGCTCAG	GACCGTCGGCACTTTATCAATCTCGCTCCAAACC	GGTTTGGAGCGAGATTGATAAAGTGCCGACGGTC	NA
error-prone_3C_2	Error-prone PCR	DpnII	200U	3C	2	3C DNA	4x50 ng	CCTACCTTTGGCAAAGGTCATG	GAATCGGCGGAATAACCTAACACG	29	ACGTAGGCCTAAATGGCTGTGAGAGAGCTCAGNNNNTTCACCGCCTGCTATCATCC	GCACTTTATCAATCTCGCTCCAAACCGAATCGGCGGAATAACCTAACACG	5	AATGATACGGCGACCACCGAGATCTACACACGTAGGCCTAAATGGCTGTGAGAGAGCTCAG	CAAGCAGAAGACGGCATACGAGATTCTGTGAATGGACCGTCGGCACTTTATCAATCTCGCTCCAAACC	6	337	MiSeq	600V3	2017-09-26	300	300	10	NA	ACGTAGGCCTAAATGGCTGTGAGAGAGCTCAG	GACCGTCGGCACTTTATCAATCTCGCTCCAAACC	GGTTTGGAGCGAGATTGATAAAGTGCCGACGGTC	NA
error-prone_genomic_1	Error-prone PCR	DpnII	200U	Genomic	1	3C DNA	4x50 ng	TTCACCGCCTGCTATCATCC	GAATCGGCGGAATAACCTAACACG	18	ACGTAGGCCTAAATGGCTGTGAGAGAGCTCAGNNNNTTCACCGCCTGCTATCATCC	GCACTTTATCAATCTCGCTCCAAACCGAATCGGCGGAATAACCTAACACG	5	AATGATACGGCGACCACCGAGATCTACACACGTAGGCCTAAATGGCTGTGAGAGAGCTCAG	CAAGCAGAAGACGGCATACGAGATACATTGCATCGACCGTCGGCACTTTATCAATCTCGCTCCAAACC	6	337	MiSeq	600V3	2017-09-26	300	300	10	NA	ACGTAGGCCTAAATGGCTGTGAGAGAGCTCAG	GACCGTCGGCACTTTATCAATCTCGCTCCAAACC	GGTTTGGAGCGAGATTGATAAAGTGCCGACGGTC	NA
error-prone_genomic_2	Error-prone PCR	DpnII	200U	Genomic	2	3C DNA	4x50 ng	TTCACCGCCTGCTATCATCC	GAATCGGCGGAATAACCTAACACG	18	ACGTAGGCCTAAATGGCTGTGAGAGAGCTCAGNNNNTTCACCGCCTGCTATCATCC	GCACTTTATCAATCTCGCTCCAAACCGAATCGGCGGAATAACCTAACACG	5	AATGATACGGCGACCACCGAGATCTACACACGTAGGCCTAAATGGCTGTGAGAGAGCTCAG	CAAGCAGAAGACGGCATACGAGATGTTCAGACACGACCGTCGGCACTTTATCAATCTCGCTCCAAACC	6	337	MiSeq	600V3	2017-09-26	300	300	10	NA	ACGTAGGCCTAAATGGCTGTGAGAGAGCTCAG	GACCGTCGGCACTTTATCAATCTCGCTCCAAACC	GGTTTGGAGCGAGATTGATAAAGTGCCGACGGTC	NA
error-prone_offtarget_1	Error-prone PCR	DpnII	200U	Off-target	1	3C DNA	4x50 ng	CATTGAGCCATACGAAGAGG	GAATCGGCGGAATAACCTAACACG	29	ACGTAGGCCTAAATGGCTGTGAGAGAGCTCAGNNNNTTCACCGCCTGCTATCATCC	GCACTTTATCAATCTCGCTCCAAACCGAATCGGCGGAATAACCTAACACG	5	AATGATACGGCGACCACCGAGATCTACACACGTAGGCCTAAATGGCTGTGAGAGAGCTCAG	CAAGCAGAAGACGGCATACGAGATTTGAGAGTATGACCGTCGGCACTTTATCAATCTCGCTCCAAACC	6	337	MiSeq	600V3	2017-09-26	300	300	10	NA	ACGTAGGCCTAAATGGCTGTGAGAGAGCTCAG	GACCGTCGGCACTTTATCAATCTCGCTCCAAACC	GGTTTGGAGCGAGATTGATAAAGTGCCGACGGTC	NA
error-prone_offtarget_2	Error-prone PCR	DpnII	200U	Off-target	2	3C DNA	4x50 ng	CATTGAGCCATACGAAGAGG	GAATCGGCGGAATAACCTAACACG	29	ACGTAGGCCTAAATGGCTGTGAGAGAGCTCAGNNNNTTCACCGCCTGCTATCATCC	GCACTTTATCAATCTCGCTCCAAACCGAATCGGCGGAATAACCTAACACG	5	AATGATACGGCGACCACCGAGATCTACACACGTAGGCCTAAATGGCTGTGAGAGAGCTCAG	CAAGCAGAAGACGGCATACGAGATATCGGTGGTAGACCGTCGGCACTTTATCAATCTCGCTCCAAACC	6	337	MiSeq	600V3	2017-09-26	300	300	10	NA	ACGTAGGCCTAAATGGCTGTGAGAGAGCTCAG	GACCGTCGGCACTTTATCAATCTCGCTCCAAACC	GGTTTGGAGCGAGATTGATAAAGTGCCGACGGTC	NA
3bp_substitution_3C_1	3bp substitution	DpnII	200U	3C	1	3C DNA	4x50 ng	CCTACCTTTGGCAAAGGTCATG	CAGGAGTCTTGGTAGCACCC	28	ACGTAGGCCTAAATGGCTGTGAGAGAGCTCAGNNNNTCTTAGCCGCCGAAGCTATC	GCACTTTATCAATCTCGCTCCAAACCCAGGAGTCTTGGTAGCACCC	8	AATGATACGGCGACCACCGAGATCTACACACGTAGGCCTAAATGGCTGTGAGAGAGCTCAG	CAAGCAGAAGACGGCATACGAGATCTATTGTAACGACCGTCGGCACTTTATCAATCTCGCTCCAAACC	6	314	MiSeq	600V3	2018-01-25	215	215	10	NA	ACGTAGGCCTAAATGGCTGTGAGAGAGCTCAG	GACCGTCGGCACTTTATCAATCTCGCTCCAAACC	GGTTTGGAGCGAGATTGATAAAGTGCCGACGGTC	NA
3bp_substitution_3C_2	3bp substitution	DpnII	200U	3C	2	3C DNA	4x50 ng	CCTACCTTTGGCAAAGGTCATG	CAGGAGTCTTGGTAGCACCC	28	ACGTAGGCCTAAATGGCTGTGAGAGAGCTCAGNNNNTCTTAGCCGCCGAAGCTATC	GCACTTTATCAATCTCGCTCCAAACCCAGGAGTCTTGGTAGCACCC	8	AATGATACGGCGACCACCGAGATCTACACACGTAGGCCTAAATGGCTGTGAGAGAGCTCAG	CAAGCAGAAGACGGCATACGAGATGGTGCCAATAGACCGTCGGCACTTTATCAATCTCGCTCCAAACC	6	314	MiSeq	600V3	2018-01-25	215	215	10	NA	ACGTAGGCCTAAATGGCTGTGAGAGAGCTCAG	GACCGTCGGCACTTTATCAATCTCGCTCCAAACC	GGTTTGGAGCGAGATTGATAAAGTGCCGACGGTC	NA
3bp_substitution_genomic_1	3bp substitution	DpnII	200U	Genomic	1	3C DNA	50 ng	TCTTAGCCGCCGAAGCTATC	CAGGAGTCTTGGTAGCACCC	17	ACGTAGGCCTAAATGGCTGTGAGAGAGCTCAGNNNNTCTTAGCCGCCGAAGCTATC	GCACTTTATCAATCTCGCTCCAAACCCAGGAGTCTTGGTAGCACCC	8	AATGATACGGCGACCACCGAGATCTACACACGTAGGCCTAAATGGCTGTGAGAGAGCTCAG	CAAGCAGAAGACGGCATACGAGATGCAGAATATCGACCGTCGGCACTTTATCAATCTCGCTCCAAACC	6	314	MiSeq	600V3	2018-01-25	215	215	10	NA	ACGTAGGCCTAAATGGCTGTGAGAGAGCTCAG	GACCGTCGGCACTTTATCAATCTCGCTCCAAACC	GGTTTGGAGCGAGATTGATAAAGTGCCGACGGTC	NA
3bp_substitution_genomic_2	3bp substitution	DpnII	200U	Genomic	2	3C DNA	50 ng	TCTTAGCCGCCGAAGCTATC	CAGGAGTCTTGGTAGCACCC	17	ACGTAGGCCTAAATGGCTGTGAGAGAGCTCAGNNNNTCTTAGCCGCCGAAGCTATC	GCACTTTATCAATCTCGCTCCAAACCCAGGAGTCTTGGTAGCACCC	8	AATGATACGGCGACCACCGAGATCTACACACGTAGGCCTAAATGGCTGTGAGAGAGCTCAG	CAAGCAGAAGACGGCATACGAGATGTAACAAGAGGACCGTCGGCACTTTATCAATCTCGCTCCAAACC	6	314	MiSeq	600V3	2018-01-25	215	215	10	NA	ACGTAGGCCTAAATGGCTGTGAGAGAGCTCAG	GACCGTCGGCACTTTATCAATCTCGCTCCAAACC	GGTTTGGAGCGAGATTGATAAAGTGCCGACGGTC	NA
3bp_substitution_offtarget_1	3bp substitution	DpnII	200U	Off-target	1	3C DNA	4x50 ng	CATTGAGCCATACGAAGAGG	CAGGAGTCTTGGTAGCACCC	27	ACGTAGGCCTAAATGGCTGTGAGAGAGCTCAGNNNNTCTTAGCCGCCGAAGCTATC	GCACTTTATCAATCTCGCTCCAAACCCAGGAGTCTTGGTAGCACCC	5	AATGATACGGCGACCACCGAGATCTACACACGTAGGCCTAAATGGCTGTGAGAGAGCTCAG	CAAGCAGAAGACGGCATACGAGATGCAACGGTTGGACCGTCGGCACTTTATCAATCTCGCTCCAAACC	6	314	MiSeq	600V3	2018-01-25	215	215	10	NA	ACGTAGGCCTAAATGGCTGTGAGAGAGCTCAG	GACCGTCGGCACTTTATCAATCTCGCTCCAAACC	GGTTTGGAGCGAGATTGATAAAGTGCCGACGGTC	NA
3bp_substitution_offtarget_2	3bp substitution	DpnII	200U	Off-target	2	3C DNA	4x50 ng	CATTGAGCCATACGAAGAGG	CAGGAGTCTTGGTAGCACCC	27	ACGTAGGCCTAAATGGCTGTGAGAGAGCTCAGNNNNTCTTAGCCGCCGAAGCTATC	GCACTTTATCAATCTCGCTCCAAACCCAGGAGTCTTGGTAGCACCC	5	AATGATACGGCGACCACCGAGATCTACACACGTAGGCCTAAATGGCTGTGAGAGAGCTCAG	CAAGCAGAAGACGGCATACGAGATGAACGCAGTAGACCGTCGGCACTTTATCAATCTCGCTCCAAACC	6	314	MiSeq	600V3	2018-01-25	215	215	10	NA	ACGTAGGCCTAAATGGCTGTGAGAGAGCTCAG	GACCGTCGGCACTTTATCAATCTCGCTCCAAACC	GGTTTGGAGCGAGATTGATAAAGTGCCGACGGTC	NA
in-gene_ko_3C_1	In-gene trans KO	EcoRI-HF	400U	3C	1	3C DNA	50 ng	GATGTCCACGAGGTCTCT	GGCTTTACAGATTTTTGGAGTGG	29	GATGTCCACGAGGTCTCT	GCACTTTATCAATCTCGCTCCAAACCGATAGCTTCGGCGGCTAAGA	5	AATGATACGGCGACCACCGAGATCTACACACGTAGGCGATGTCCACGAGGTCTCT	CAAGCAGAAGACGGCATACGAGATGTTCAGACACGACCGTCGGCACTTTATCAATCTCGCTCCAAACC	7	265	NextSeq 500	High 75	2017-11-11	26	57	8	NA	ACGTAGGCGATGTCCACGAGGTCTCT	GACCGTCGGCACTTTATCAATCTCGCTCCAAACC	GGTTTGGAGCGAGATTGATAAAGTGCCGACGGTC	NA
in-gene_ko_3C_2	In-gene trans KO	EcoRI-HF	400U	3C	2	3C DNA	50 ng	GATGTCCACGAGGTCTCT	GGCTTTACAGATTTTTGGAGTGG	29	GATGTCCACGAGGTCTCT	GCACTTTATCAATCTCGCTCCAAACCGATAGCTTCGGCGGCTAAGA	5	AATGATACGGCGACCACCGAGATCTACACACGTAGGCGATGTCCACGAGGTCTCT	CAAGCAGAAGACGGCATACGAGATTTGAGAGTATGACCGTCGGCACTTTATCAATCTCGCTCCAAACC	7	265	NextSeq 500	High 75	2017-11-11	26	57	8	NA	ACGTAGGCGATGTCCACGAGGTCTCT	GACCGTCGGCACTTTATCAATCTCGCTCCAAACC	GGTTTGGAGCGAGATTGATAAAGTGCCGACGGTC	NA
in-gene_ko_genomic_1	In-gene trans KO	EcoRI-HF	400U	Genomic	1	3C DNA	50 ng	GATGTCCACGAGGTCTCT	AACAGGACTAGGATGAGTAGCAG	18	GATGTCCACGAGGTCTCT	GCACTTTATCAATCTCGCTCCAAACCGATAGCTTCGGCGGCTAAGA	5	AATGATACGGCGACCACCGAGATCTACACACGTAGGCGATGTCCACGAGGTCTCT	CAAGCAGAAGACGGCATACGAGATTCTGTGAATGGACCGTCGGCACTTTATCAATCTCGCTCCAAACC	7	265	NextSeq 500	High 75	2017-11-11	26	57	8	NA	ACGTAGGCGATGTCCACGAGGTCTCT	GACCGTCGGCACTTTATCAATCTCGCTCCAAACC	GGTTTGGAGCGAGATTGATAAAGTGCCGACGGTC	NA
in-gene_ko_genomic_2	In-gene trans KO	EcoRI-HF	400U	Genomic	2	3C DNA	50 ng	GATGTCCACGAGGTCTCT	AACAGGACTAGGATGAGTAGCAG	18	GATGTCCACGAGGTCTCT	GCACTTTATCAATCTCGCTCCAAACCGATAGCTTCGGCGGCTAAGA	5	AATGATACGGCGACCACCGAGATCTACACACGTAGGCGATGTCCACGAGGTCTCT	CAAGCAGAAGACGGCATACGAGATGAACGACATTGACCGTCGGCACTTTATCAATCTCGCTCCAAACC	7	265	NextSeq 500	High 75	2017-11-11	26	57	8	NA	ACGTAGGCGATGTCCACGAGGTCTCT	GACCGTCGGCACTTTATCAATCTCGCTCCAAACC	GGTTTGGAGCGAGATTGATAAAGTGCCGACGGTC	NA
in-gene_ko_offtarget_1	In-gene trans KO	EcoRI-HF	400U	Off-target	1	3C DNA	50 ng	GATGTCCACGAGGTCTCT	TATCTTGATCGGCACTACGC	31	GATGTCCACGAGGTCTCT	GCACTTTATCAATCTCGCTCCAAACCGATAGCTTCGGCGGCTAAGA	5	AATGATACGGCGACCACCGAGATCTACACACGTAGGCGATGTCCACGAGGTCTCT	CAAGCAGAAGACGGCATACGAGATATCGGTGGTAGACCGTCGGCACTTTATCAATCTCGCTCCAAACC	7	265	NextSeq 500	High 75	2017-11-11	26	57	8	NA	ACGTAGGCGATGTCCACGAGGTCTCT	GACCGTCGGCACTTTATCAATCTCGCTCCAAACC	GGTTTGGAGCGAGATTGATAAAGTGCCGACGGTC	NA
in-gene_ko_offtarget_2	In-gene trans KO	EcoRI-HF	400U	Off-target	2	3C DNA	50 ng	GATGTCCACGAGGTCTCT	TATCTTGATCGGCACTACGC	31	GATGTCCACGAGGTCTCT	GCACTTTATCAATCTCGCTCCAAACCGATAGCTTCGGCGGCTAAGA	5	AATGATACGGCGACCACCGAGATCTACACACGTAGGCGATGTCCACGAGGTCTCT	CAAGCAGAAGACGGCATACGAGATTGTTATGTCCGACCGTCGGCACTTTATCAATCTCGCTCCAAACC	7	265	NextSeq 500	High 75	2017-11-11	26	57	8	NA	ACGTAGGCGATGTCCACGAGGTCTCT	GACCGTCGGCACTTTATCAATCTCGCTCCAAACC	GGTTTGGAGCGAGATTGATAAAGTGCCGACGGTC	NA
fixed-locus_ko_3C_1	Fixed-locus trans KO	EcoRI-HF	400U	3C	1	3C DNA	8x50 ng	CAAAGTTACCGCGCCAATCG	GGCTTTACAGATTTTTGGAGTGG	24	AATGATACGGCGACCACCGAGATCTACACACGTAGGCCTAAATGGCTGTGAGAGAGCTCAG	GCACTTTATCAATCTCGCTCCAAACCGATAGCTTCGGCGGCTAAGA	6	AATGATACGGCGACCACCGAGATCTACACACGTAGGCCTAAATGGCTGTGAGAGAGCTCAG	CAAGCAGAAGACGGCATACGAGATACCAGAGGTCGACCGTCGGCACTTTATCAATCTCGCTCCAAACC	9	162	NextSeq 500	High 75	2017-12-19	36	36	10	NA	ACGTAGGCCTAAATGGCTGTGAGAGAGCTCAG	GACCGTCGGCACTTTATCAATCTCGCTCCAAACC	GGTTTGGAGCGAGATTGATAAAGTGCCGACGGTC	NA
fixed-locus_ko_3C_2	Fixed-locus trans KO	EcoRI-HF	400U	3C	2	3C DNA	8x50 ng	CAAAGTTACCGCGCCAATCG	GGCTTTACAGATTTTTGGAGTGG	24	AATGATACGGCGACCACCGAGATCTACACACGTAGGCCTAAATGGCTGTGAGAGAGCTCAG	GCACTTTATCAATCTCGCTCCAAACCGATAGCTTCGGCGGCTAAGA	6	AATGATACGGCGACCACCGAGATCTACACACGTAGGCCTAAATGGCTGTGAGAGAGCTCAG	CAAGCAGAAGACGGCATACGAGATACATTGCATCGACCGTCGGCACTTTATCAATCTCGCTCCAAACC	9	162	NextSeq 500	High 75	2017-12-19	36	36	10	NA	ACGTAGGCCTAAATGGCTGTGAGAGAGCTCAG	GACCGTCGGCACTTTATCAATCTCGCTCCAAACC	GGTTTGGAGCGAGATTGATAAAGTGCCGACGGTC	NA
fixed-locus_ko_3C_3	Fixed-locus trans KO	EcoRI-HF	400U	3C	3	3C DNA	8x50 ng	CAAAGTTACCGCGCCAATCG	GGCTTTACAGATTTTTGGAGTGG	24	AATGATACGGCGACCACCGAGATCTACACACGTAGGCCTAAATGGCTGTGAGAGAGCTCAG	GCACTTTATCAATCTCGCTCCAAACCGATAGCTTCGGCGGCTAAGA	6	AATGATACGGCGACCACCGAGATCTACACACGTAGGCCTAAATGGCTGTGAGAGAGCTCAG	CAAGCAGAAGACGGCATACGAGATGTTCAGACACGACCGTCGGCACTTTATCAATCTCGCTCCAAACC	9	162	NextSeq 500	High 75	2017-12-19	36	36	10	NA	ACGTAGGCCTAAATGGCTGTGAGAGAGCTCAG	GACCGTCGGCACTTTATCAATCTCGCTCCAAACC	GGTTTGGAGCGAGATTGATAAAGTGCCGACGGTC	NA
fixed-locus_ko_genomic_1	Fixed-locus trans KO	EcoRI-HF	400U	Genomic	1	3C DNA	50 ng	CAAAGTTACCGCGCCAATCG	GATAGCTTCGGCGGCTAAGA	18	AATGATACGGCGACCACCGAGATCTACACACGTAGGCCTAAATGGCTGTGAGAGAGCTCAG	GCACTTTATCAATCTCGCTCCAAACCGATAGCTTCGGCGGCTAAGA	6	AATGATACGGCGACCACCGAGATCTACACACGTAGGCCTAAATGGCTGTGAGAGAGCTCAG	CAAGCAGAAGACGGCATACGAGATACCTTGTCTTGACCGTCGGCACTTTATCAATCTCGCTCCAAACC	6	162	NextSeq 500	High 75	2017-12-19	36	36	10	NA	ACGTAGGCCTAAATGGCTGTGAGAGAGCTCAG	GACCGTCGGCACTTTATCAATCTCGCTCCAAACC	GGTTTGGAGCGAGATTGATAAAGTGCCGACGGTC	NA
fixed-locus_ko_genomic_2	Fixed-locus trans KO	EcoRI-HF	400U	Genomic	2	3C DNA	50 ng	CAAAGTTACCGCGCCAATCG	GATAGCTTCGGCGGCTAAGA	18	AATGATACGGCGACCACCGAGATCTACACACGTAGGCCTAAATGGCTGTGAGAGAGCTCAG	GCACTTTATCAATCTCGCTCCAAACCGATAGCTTCGGCGGCTAAGA	6	AATGATACGGCGACCACCGAGATCTACACACGTAGGCCTAAATGGCTGTGAGAGAGCTCAG	CAAGCAGAAGACGGCATACGAGATGTGTGGCCAGGACCGTCGGCACTTTATCAATCTCGCTCCAAACC	6	162	NextSeq 500	High 75	2017-12-19	36	36	10	NA	ACGTAGGCCTAAATGGCTGTGAGAGAGCTCAG	GACCGTCGGCACTTTATCAATCTCGCTCCAAACC	GGTTTGGAGCGAGATTGATAAAGTGCCGACGGTC	NA
fixed-locus_ko_genomic_3	Fixed-locus trans KO	EcoRI-HF	400U	Genomic	3	3C DNA	50 ng	CAAAGTTACCGCGCCAATCG	GATAGCTTCGGCGGCTAAGA	18	AATGATACGGCGACCACCGAGATCTACACACGTAGGCCTAAATGGCTGTGAGAGAGCTCAG	GCACTTTATCAATCTCGCTCCAAACCGATAGCTTCGGCGGCTAAGA	6	AATGATACGGCGACCACCGAGATCTACACACGTAGGCCTAAATGGCTGTGAGAGAGCTCAG	CAAGCAGAAGACGGCATACGAGATGACTGAGTATGACCGTCGGCACTTTATCAATCTCGCTCCAAACC	6	162	NextSeq 500	High 75	2017-12-19	36	36	10	NA	ACGTAGGCCTAAATGGCTGTGAGAGAGCTCAG	GACCGTCGGCACTTTATCAATCTCGCTCCAAACC	GGTTTGGAGCGAGATTGATAAAGTGCCGACGGTC	NA
fixed-locus_ko_offtarget_1	Fixed-locus trans KO	EcoRI-HF	400U	Off-target	1	3C DNA	50 ng	CAAAGTTACCGCGCCAATCG	TTATGCCCTCCACCTCCTTC	26	AATGATACGGCGACCACCGAGATCTACACACGTAGGCCTAAATGGCTGTGAGAGAGCTCAG	GCACTTTATCAATCTCGCTCCAAACCGATAGCTTCGGCGGCTAAGA	6	AATGATACGGCGACCACCGAGATCTACACACGTAGGCCTAAATGGCTGTGAGAGAGCTCAG	CAAGCAGAAGACGGCATACGAGATCTATTGTAACGACCGTCGGCACTTTATCAATCTCGCTCCAAACC	9	162	NextSeq 500	High 75	2017-12-19	36	36	10	NA	ACGTAGGCCTAAATGGCTGTGAGAGAGCTCAG	GACCGTCGGCACTTTATCAATCTCGCTCCAAACC	GGTTTGGAGCGAGATTGATAAAGTGCCGACGGTC	NA
fixed-locus_ko_offtarget_2	Fixed-locus trans KO	EcoRI-HF	400U	Off-target	2	3C DNA	50 ng	CAAAGTTACCGCGCCAATCG	TTATGCCCTCCACCTCCTTC	26	AATGATACGGCGACCACCGAGATCTACACACGTAGGCCTAAATGGCTGTGAGAGAGCTCAG	GCACTTTATCAATCTCGCTCCAAACCGATAGCTTCGGCGGCTAAGA	6	AATGATACGGCGACCACCGAGATCTACACACGTAGGCCTAAATGGCTGTGAGAGAGCTCAG	CAAGCAGAAGACGGCATACGAGATGGTGCCAATAGACCGTCGGCACTTTATCAATCTCGCTCCAAACC	9	162	NextSeq 500	High 75	2017-12-19	36	36	10	NA	ACGTAGGCCTAAATGGCTGTGAGAGAGCTCAG	GACCGTCGGCACTTTATCAATCTCGCTCCAAACC	GGTTTGGAGCGAGATTGATAAAGTGCCGACGGTC	NA
fixed-locus_ko_offtarget_3	Fixed-locus trans KO	EcoRI-HF	400U	Off-target	3	3C DNA	50 ng	CAAAGTTACCGCGCCAATCG	TTATGCCCTCCACCTCCTTC	26	AATGATACGGCGACCACCGAGATCTACACACGTAGGCCTAAATGGCTGTGAGAGAGCTCAG	GCACTTTATCAATCTCGCTCCAAACCGATAGCTTCGGCGGCTAAGA	6	AATGATACGGCGACCACCGAGATCTACACACGTAGGCCTAAATGGCTGTGAGAGAGCTCAG	CAAGCAGAAGACGGCATACGAGATGCAACGGTTGGACCGTCGGCACTTTATCAATCTCGCTCCAAACC	9	162	NextSeq 500	High 75	2017-12-19	36	36	10	NA	ACGTAGGCCTAAATGGCTGTGAGAGAGCTCAG	GACCGTCGGCACTTTATCAATCTCGCTCCAAACC	GGTTTGGAGCGAGATTGATAAAGTGCCGACGGTC	NA
validation_ko_3C_1	Validation trans KO	EcoRI-HF	400U	3C	1	3C DNA	8x50 ng	CAAAGTTACCGCGCCAATCG	GGCTTTACAGATTTTTGGAGTGG	27	AATGATACGGCGACCACCGAGATCTACACACGTAGGCCTAAATGGCTGTGAGAGAGCTCAG	GCACTTTATCAATCTCGCTCCAAACCGATAGCTTCGGCGGCTAAGA	8	AATGATACGGCGACCACCGAGATCTACACACGTAGGCCTAAATGGCTGTGAGAGAGCTCAG	CAAGCAGAAGACGGCATACGAGATTTGAGAGTATGACCGTCGGCACTTTATCAATCTCGCTCCAAACC	7	162	MiSeq	50V2	2018-02-06	25	32	10	NA	ACGTAGGCCTAAATGGCTGTGAGAGAGCTCAG	GACCGTCGGCACTTTATCAATCTCGCTCCAAACC	GGTTTGGAGCGAGATTGATAAAGTGCCGACGGTC	NA
validation_ko_3C_2	Validation trans KO	EcoRI-HF	400U	3C	2	3C DNA	8x50 ng	CAAAGTTACCGCGCCAATCG	GGCTTTACAGATTTTTGGAGTGG	27	AATGATACGGCGACCACCGAGATCTACACACGTAGGCCTAAATGGCTGTGAGAGAGCTCAG	GCACTTTATCAATCTCGCTCCAAACCGATAGCTTCGGCGGCTAAGA	8	AATGATACGGCGACCACCGAGATCTACACACGTAGGCCTAAATGGCTGTGAGAGAGCTCAG	CAAGCAGAAGACGGCATACGAGATATCGGTGGTAGACCGTCGGCACTTTATCAATCTCGCTCCAAACC	7	162	MiSeq	50V2	2018-02-06	25	32	10	NA	ACGTAGGCCTAAATGGCTGTGAGAGAGCTCAG	GACCGTCGGCACTTTATCAATCTCGCTCCAAACC	GGTTTGGAGCGAGATTGATAAAGTGCCGACGGTC	NA
validation_ko_3C_3	Validation trans KO	EcoRI-HF	400U	3C	3	3C DNA	8x50 ng	CAAAGTTACCGCGCCAATCG	GGCTTTACAGATTTTTGGAGTGG	27	AATGATACGGCGACCACCGAGATCTACACACGTAGGCCTAAATGGCTGTGAGAGAGCTCAG	GCACTTTATCAATCTCGCTCCAAACCGATAGCTTCGGCGGCTAAGA	8	AATGATACGGCGACCACCGAGATCTACACACGTAGGCCTAAATGGCTGTGAGAGAGCTCAG	CAAGCAGAAGACGGCATACGAGATTGTTATGTCCGACCGTCGGCACTTTATCAATCTCGCTCCAAACC	7	162	MiSeq	50V2	2018-02-06	25	32	10	NA	ACGTAGGCCTAAATGGCTGTGAGAGAGCTCAG	GACCGTCGGCACTTTATCAATCTCGCTCCAAACC	GGTTTGGAGCGAGATTGATAAAGTGCCGACGGTC	NA
validation_ko_genomic_1	Validation trans KO	EcoRI-HF	400U	Genomic	1	3C DNA	50 ng	CAAAGTTACCGCGCCAATCG	GATAGCTTCGGCGGCTAAGA	18	AATGATACGGCGACCACCGAGATCTACACACGTAGGCCTAAATGGCTGTGAGAGAGCTCAG	GCACTTTATCAATCTCGCTCCAAACCGATAGCTTCGGCGGCTAAGA	6	AATGATACGGCGACCACCGAGATCTACACACGTAGGCCTAAATGGCTGTGAGAGAGCTCAG	CAAGCAGAAGACGGCATACGAGATACCAGAGGTCGACCGTCGGCACTTTATCAATCTCGCTCCAAACC	7	162	MiSeq	50V2	2018-02-06	25	32	10	NA	ACGTAGGCCTAAATGGCTGTGAGAGAGCTCAG	GACCGTCGGCACTTTATCAATCTCGCTCCAAACC	GGTTTGGAGCGAGATTGATAAAGTGCCGACGGTC	NA
validation_ko_genomic_2	Validation trans KO	EcoRI-HF	400U	Genomic	2	3C DNA	50 ng	CAAAGTTACCGCGCCAATCG	GATAGCTTCGGCGGCTAAGA	18	AATGATACGGCGACCACCGAGATCTACACACGTAGGCCTAAATGGCTGTGAGAGAGCTCAG	GCACTTTATCAATCTCGCTCCAAACCGATAGCTTCGGCGGCTAAGA	6	AATGATACGGCGACCACCGAGATCTACACACGTAGGCCTAAATGGCTGTGAGAGAGCTCAG	CAAGCAGAAGACGGCATACGAGATACATTGCATCGACCGTCGGCACTTTATCAATCTCGCTCCAAACC	7	162	MiSeq	50V2	2018-02-06	25	32	10	NA	ACGTAGGCCTAAATGGCTGTGAGAGAGCTCAG	GACCGTCGGCACTTTATCAATCTCGCTCCAAACC	GGTTTGGAGCGAGATTGATAAAGTGCCGACGGTC	NA
validation_ko_genomic_3	Validation trans KO	EcoRI-HF	400U	Genomic	3	3C DNA	50 ng	CAAAGTTACCGCGCCAATCG	GATAGCTTCGGCGGCTAAGA	18	AATGATACGGCGACCACCGAGATCTACACACGTAGGCCTAAATGGCTGTGAGAGAGCTCAG	GCACTTTATCAATCTCGCTCCAAACCGATAGCTTCGGCGGCTAAGA	6	AATGATACGGCGACCACCGAGATCTACACACGTAGGCCTAAATGGCTGTGAGAGAGCTCAG	CAAGCAGAAGACGGCATACGAGATGTTCAGACACGACCGTCGGCACTTTATCAATCTCGCTCCAAACC	7	162	MiSeq	50V2	2018-02-06	25	32	10	NA	ACGTAGGCCTAAATGGCTGTGAGAGAGCTCAG	GACCGTCGGCACTTTATCAATCTCGCTCCAAACC	GGTTTGGAGCGAGATTGATAAAGTGCCGACGGTC	NA
interactor_ko_3C_1	Interactor KO	EcoRI-HF	400U	3C	1	3C DNA	8x50 ng	CAAAGTTACCGCGCCAATCG	GGCTTTACAGATTTTTGGAGTGG	25	AATGATACGGCGACCACCGAGATCTACACACGTAGGCCTAAATGGCTGTGAGAGAGCTCAG	GCACTTTATCAATCTCGCTCCAAACCGATAGCTTCGGCGGCTAAGA	11	AATGATACGGCGACCACCGAGATCTACACACGTAGGCCTAAATGGCTGTGAGAGAGCTCAG	CAAGCAGAAGACGGCATACGAGATGCAGAATATCGACCGTCGGCACTTTATCAATCTCGCTCCAAACC	7	162	NextSeq 500	High 75	2018-05-18	40	40	8	NA	ACGTAGGCCTAAATGGCTGTGAGAGAGCTCAG	GACCGTCGGCACTTTATCAATCTCGCTCCAAACC	GGTTTGGAGCGAGATTGATAAAGTGCCGACGGTC	NA
interactor_ko_3C_2	Interactor KO	EcoRI-HF	400U	3C	2	3C DNA	8x50 ng	CAAAGTTACCGCGCCAATCG	GGCTTTACAGATTTTTGGAGTGG	25	AATGATACGGCGACCACCGAGATCTACACACGTAGGCCTAAATGGCTGTGAGAGAGCTCAG	GCACTTTATCAATCTCGCTCCAAACCGATAGCTTCGGCGGCTAAGA	11	AATGATACGGCGACCACCGAGATCTACACACGTAGGCCTAAATGGCTGTGAGAGAGCTCAG	CAAGCAGAAGACGGCATACGAGATATCTAGCGTGGACCGTCGGCACTTTATCAATCTCGCTCCAAACC	7	162	NextSeq 500	High 75	2018-05-18	40	40	8	NA	ACGTAGGCCTAAATGGCTGTGAGAGAGCTCAG	GACCGTCGGCACTTTATCAATCTCGCTCCAAACC	GGTTTGGAGCGAGATTGATAAAGTGCCGACGGTC	NA
interactor_ko_3C_3	Interactor KO	EcoRI-HF	400U	3C	3	3C DNA	8x50 ng	CAAAGTTACCGCGCCAATCG	GGCTTTACAGATTTTTGGAGTGG	25	AATGATACGGCGACCACCGAGATCTACACACGTAGGCCTAAATGGCTGTGAGAGAGCTCAG	GCACTTTATCAATCTCGCTCCAAACCGATAGCTTCGGCGGCTAAGA	11	AATGATACGGCGACCACCGAGATCTACACACGTAGGCCTAAATGGCTGTGAGAGAGCTCAG	CAAGCAGAAGACGGCATACGAGATTTCCACTCAGGACCGTCGGCACTTTATCAATCTCGCTCCAAACC	7	162	NextSeq 500	High 75	2018-05-18	40	40	8	NA	ACGTAGGCCTAAATGGCTGTGAGAGAGCTCAG	GACCGTCGGCACTTTATCAATCTCGCTCCAAACC	GGTTTGGAGCGAGATTGATAAAGTGCCGACGGTC	NA
interactor_ko_genomic_1	Interactor KO	EcoRI-HF	400U	Genomic	1	3C DNA	50 ng	CAAAGTTACCGCGCCAATCG	GATAGCTTCGGCGGCTAAGA	18	AATGATACGGCGACCACCGAGATCTACACACGTAGGCCTAAATGGCTGTGAGAGAGCTCAG	GCACTTTATCAATCTCGCTCCAAACCGATAGCTTCGGCGGCTAAGA	7	AATGATACGGCGACCACCGAGATCTACACACGTAGGCCTAAATGGCTGTGAGAGAGCTCAG	CAAGCAGAAGACGGCATACGAGATTGTTATGTCCGACCGTCGGCACTTTATCAATCTCGCTCCAAACC	7	162	NextSeq 500	High 75	2018-05-18	40	40	8	NA	ACGTAGGCCTAAATGGCTGTGAGAGAGCTCAG	GACCGTCGGCACTTTATCAATCTCGCTCCAAACC	GGTTTGGAGCGAGATTGATAAAGTGCCGACGGTC	NA
interactor_ko_genomic_2	Interactor KO	EcoRI-HF	400U	Genomic	2	3C DNA	50 ng	CAAAGTTACCGCGCCAATCG	GATAGCTTCGGCGGCTAAGA	18	AATGATACGGCGACCACCGAGATCTACACACGTAGGCCTAAATGGCTGTGAGAGAGCTCAG	GCACTTTATCAATCTCGCTCCAAACCGATAGCTTCGGCGGCTAAGA	7	AATGATACGGCGACCACCGAGATCTACACACGTAGGCCTAAATGGCTGTGAGAGAGCTCAG	CAAGCAGAAGACGGCATACGAGATGAACGACATTGACCGTCGGCACTTTATCAATCTCGCTCCAAACC	7	162	NextSeq 500	High 75	2018-05-18	40	40	8	NA	ACGTAGGCCTAAATGGCTGTGAGAGAGCTCAG	GACCGTCGGCACTTTATCAATCTCGCTCCAAACC	GGTTTGGAGCGAGATTGATAAAGTGCCGACGGTC	NA
interactor_ko_genomic_3	Interactor KO	EcoRI-HF	400U	Genomic	3	3C DNA	50 ng	CAAAGTTACCGCGCCAATCG	GATAGCTTCGGCGGCTAAGA	18	AATGATACGGCGACCACCGAGATCTACACACGTAGGCCTAAATGGCTGTGAGAGAGCTCAG	GCACTTTATCAATCTCGCTCCAAACCGATAGCTTCGGCGGCTAAGA	7	AATGATACGGCGACCACCGAGATCTACACACGTAGGCCTAAATGGCTGTGAGAGAGCTCAG	CAAGCAGAAGACGGCATACGAGATGCAACGGTTGGACCGTCGGCACTTTATCAATCTCGCTCCAAACC	7	162	NextSeq 500	High 75	2018-05-18	40	40	8	NA	ACGTAGGCCTAAATGGCTGTGAGAGAGCTCAG	GACCGTCGGCACTTTATCAATCTCGCTCCAAACC	GGTTTGGAGCGAGATTGATAAAGTGCCGACGGTC	NA
Rgt1_10aaD_3C_A1	Rgt1 deletions	EcoRI-HF	400U	3C	A1	3C DNA	8x50 ng	CAAAGTTACCGCGCCAATCG	GGCTTTACAGATTTTTGGAGTGG	24	AATGATACGGCGACCACCGAGATCTACACACGTAGGCCTAAATGGCTGTGAGAGAGCTCAG	GCACTTTATCAATCTCGCTCCAAACCGATAGCTTCGGCGGCTAAGA	11	AATGATACGGCGACCACCGAGATCTACACACGTAGGCCTAAATGGCTGTGAGAGAGCTCAG	CAAGCAGAAGACGGCATACGAGATACCAGAGGTCGACCGTCGGCACTTTATCAATCTCGCTCCAAACC	9	162	NextSeq 500	High 75	2018-08-08	40	40	8	NA	ACGTAGGCCTAAATGGCTGTGAGAGAGCTCAG	GACCGTCGGCACTTTATCAATCTCGCTCCAAACC	GGTTTGGAGCGAGATTGATAAAGTGCCGACGGTC	NA
Rgt1_10aaD_3C_A2	Rgt1 deletions	EcoRI-HF	400U	3C	A2	3C DNA	8x50 ng	CAAAGTTACCGCGCCAATCG	GGCTTTACAGATTTTTGGAGTGG	24	AATGATACGGCGACCACCGAGATCTACACACGTAGGCCTAAATGGCTGTGAGAGAGCTCAG	GCACTTTATCAATCTCGCTCCAAACCGATAGCTTCGGCGGCTAAGA	11	AATGATACGGCGACCACCGAGATCTACACACGTAGGCCTAAATGGCTGTGAGAGAGCTCAG	CAAGCAGAAGACGGCATACGAGATTTGAGAGTATGACCGTCGGCACTTTATCAATCTCGCTCCAAACC	9	162	NextSeq 500	High 75	2018-08-08	40	40	8	NA	ACGTAGGCCTAAATGGCTGTGAGAGAGCTCAG	GACCGTCGGCACTTTATCAATCTCGCTCCAAACC	GGTTTGGAGCGAGATTGATAAAGTGCCGACGGTC	NA
Rgt1_10aaD_3C_A3	Rgt1 deletions	EcoRI-HF	400U	3C	A3	3C DNA	8x50 ng	CAAAGTTACCGCGCCAATCG	GGCTTTACAGATTTTTGGAGTGG	24	AATGATACGGCGACCACCGAGATCTACACACGTAGGCCTAAATGGCTGTGAGAGAGCTCAG	GCACTTTATCAATCTCGCTCCAAACCGATAGCTTCGGCGGCTAAGA	11	AATGATACGGCGACCACCGAGATCTACACACGTAGGCCTAAATGGCTGTGAGAGAGCTCAG	CAAGCAGAAGACGGCATACGAGATATCGGTGGTAGACCGTCGGCACTTTATCAATCTCGCTCCAAACC	9	162	NextSeq 500	High 75	2018-08-08	40	40	8	NA	ACGTAGGCCTAAATGGCTGTGAGAGAGCTCAG	GACCGTCGGCACTTTATCAATCTCGCTCCAAACC	GGTTTGGAGCGAGATTGATAAAGTGCCGACGGTC	NA
Rgt1_10aaD_3C_B1	Rgt1 deletions	EcoRI-HF	400U	3C	B1	3C DNA	8x50 ng	CAAAGTTACCGCGCCAATCG	GGCTTTACAGATTTTTGGAGTGG	24	AATGATACGGCGACCACCGAGATCTACACACGTAGGCCTAAATGGCTGTGAGAGAGCTCAG	GCACTTTATCAATCTCGCTCCAAACCGATAGCTTCGGCGGCTAAGA	11	AATGATACGGCGACCACCGAGATCTACACACGTAGGCCTAAATGGCTGTGAGAGAGCTCAG	CAAGCAGAAGACGGCATACGAGATTGTTATGTCCGACCGTCGGCACTTTATCAATCTCGCTCCAAACC	9	162	NextSeq 500	High 75	2018-08-08	40	40	8	NA	ACGTAGGCCTAAATGGCTGTGAGAGAGCTCAG	GACCGTCGGCACTTTATCAATCTCGCTCCAAACC	GGTTTGGAGCGAGATTGATAAAGTGCCGACGGTC	NA
Rgt1_10aaD_3C_B2	Rgt1 deletions	EcoRI-HF	400U	3C	B2	3C DNA	8x50 ng	CAAAGTTACCGCGCCAATCG	GGCTTTACAGATTTTTGGAGTGG	24	AATGATACGGCGACCACCGAGATCTACACACGTAGGCCTAAATGGCTGTGAGAGAGCTCAG	GCACTTTATCAATCTCGCTCCAAACCGATAGCTTCGGCGGCTAAGA	11	AATGATACGGCGACCACCGAGATCTACACACGTAGGCCTAAATGGCTGTGAGAGAGCTCAG	CAAGCAGAAGACGGCATACGAGATTCTGTGAATGGACCGTCGGCACTTTATCAATCTCGCTCCAAACC	9	162	NextSeq 500	High 75	2018-08-08	40	40	8	NA	ACGTAGGCCTAAATGGCTGTGAGAGAGCTCAG	GACCGTCGGCACTTTATCAATCTCGCTCCAAACC	GGTTTGGAGCGAGATTGATAAAGTGCCGACGGTC	NA
Rgt1_10aaD_3C_B3	Rgt1 deletions	EcoRI-HF	400U	3C	B3	3C DNA	8x50 ng	CAAAGTTACCGCGCCAATCG	GGCTTTACAGATTTTTGGAGTGG	24	AATGATACGGCGACCACCGAGATCTACACACGTAGGCCTAAATGGCTGTGAGAGAGCTCAG	GCACTTTATCAATCTCGCTCCAAACCGATAGCTTCGGCGGCTAAGA	11	AATGATACGGCGACCACCGAGATCTACACACGTAGGCCTAAATGGCTGTGAGAGAGCTCAG	CAAGCAGAAGACGGCATACGAGATGAACGACATTGACCGTCGGCACTTTATCAATCTCGCTCCAAACC	9	162	NextSeq 500	High 75	2018-08-08	40	40	8	NA	ACGTAGGCCTAAATGGCTGTGAGAGAGCTCAG	GACCGTCGGCACTTTATCAATCTCGCTCCAAACC	GGTTTGGAGCGAGATTGATAAAGTGCCGACGGTC	NA
Rgt1_10aaD_genomic_A1	Rgt1 deletions	EcoRI-HF	400U	Genomic	A1	3C DNA	50 ng	CAAAGTTACCGCGCCAATCG	GATAGCTTCGGCGGCTAAGA	18	AATGATACGGCGACCACCGAGATCTACACACGTAGGCCTAAATGGCTGTGAGAGAGCTCAG	GCACTTTATCAATCTCGCTCCAAACCGATAGCTTCGGCGGCTAAGA	6	AATGATACGGCGACCACCGAGATCTACACACGTAGGCCTAAATGGCTGTGAGAGAGCTCAG	CAAGCAGAAGACGGCATACGAGATGGTGCCAATAGACCGTCGGCACTTTATCAATCTCGCTCCAAACC	9	162	NextSeq 500	High 75	2018-08-08	40	40	8	NA	ACGTAGGCCTAAATGGCTGTGAGAGAGCTCAG	GACCGTCGGCACTTTATCAATCTCGCTCCAAACC	GGTTTGGAGCGAGATTGATAAAGTGCCGACGGTC	NA
Rgt1_10aaD_genomic_A2	Rgt1 deletions	EcoRI-HF	400U	Genomic	A2	3C DNA	50 ng	CAAAGTTACCGCGCCAATCG	GATAGCTTCGGCGGCTAAGA	18	AATGATACGGCGACCACCGAGATCTACACACGTAGGCCTAAATGGCTGTGAGAGAGCTCAG	GCACTTTATCAATCTCGCTCCAAACCGATAGCTTCGGCGGCTAAGA	6	AATGATACGGCGACCACCGAGATCTACACACGTAGGCCTAAATGGCTGTGAGAGAGCTCAG	CAAGCAGAAGACGGCATACGAGATGCAACGGTTGGACCGTCGGCACTTTATCAATCTCGCTCCAAACC	9	162	NextSeq 500	High 75	2018-08-08	40	40	8	NA	ACGTAGGCCTAAATGGCTGTGAGAGAGCTCAG	GACCGTCGGCACTTTATCAATCTCGCTCCAAACC	GGTTTGGAGCGAGATTGATAAAGTGCCGACGGTC	NA
Rgt1_10aaD_genomic_A3	Rgt1 deletions	EcoRI-HF	400U	Genomic	A3	3C DNA	50 ng	CAAAGTTACCGCGCCAATCG	GATAGCTTCGGCGGCTAAGA	18	AATGATACGGCGACCACCGAGATCTACACACGTAGGCCTAAATGGCTGTGAGAGAGCTCAG	GCACTTTATCAATCTCGCTCCAAACCGATAGCTTCGGCGGCTAAGA	6	AATGATACGGCGACCACCGAGATCTACACACGTAGGCCTAAATGGCTGTGAGAGAGCTCAG	CAAGCAGAAGACGGCATACGAGATGAACGCAGTAGACCGTCGGCACTTTATCAATCTCGCTCCAAACC	9	162	NextSeq 500	High 75	2018-08-08	40	40	8	NA	ACGTAGGCCTAAATGGCTGTGAGAGAGCTCAG	GACCGTCGGCACTTTATCAATCTCGCTCCAAACC	GGTTTGGAGCGAGATTGATAAAGTGCCGACGGTC	NA
Rgt1_10aaD_genomic_B1	Rgt1 deletions	EcoRI-HF	400U	Genomic	B1	3C DNA	50 ng	CAAAGTTACCGCGCCAATCG	GATAGCTTCGGCGGCTAAGA	18	AATGATACGGCGACCACCGAGATCTACACACGTAGGCCTAAATGGCTGTGAGAGAGCTCAG	GCACTTTATCAATCTCGCTCCAAACCGATAGCTTCGGCGGCTAAGA	6	AATGATACGGCGACCACCGAGATCTACACACGTAGGCCTAAATGGCTGTGAGAGAGCTCAG	CAAGCAGAAGACGGCATACGAGATGCAGAATATCGACCGTCGGCACTTTATCAATCTCGCTCCAAACC	9	162	NextSeq 500	High 75	2018-08-08	40	40	8	NA	ACGTAGGCCTAAATGGCTGTGAGAGAGCTCAG	GACCGTCGGCACTTTATCAATCTCGCTCCAAACC	GGTTTGGAGCGAGATTGATAAAGTGCCGACGGTC	NA
Rgt1_10aaD_genomic_B2	Rgt1 deletions	EcoRI-HF	400U	Genomic	B2	3C DNA	50 ng	CAAAGTTACCGCGCCAATCG	GATAGCTTCGGCGGCTAAGA	18	AATGATACGGCGACCACCGAGATCTACACACGTAGGCCTAAATGGCTGTGAGAGAGCTCAG	GCACTTTATCAATCTCGCTCCAAACCGATAGCTTCGGCGGCTAAGA	6	AATGATACGGCGACCACCGAGATCTACACACGTAGGCCTAAATGGCTGTGAGAGAGCTCAG	CAAGCAGAAGACGGCATACGAGATGTAACAAGAGGACCGTCGGCACTTTATCAATCTCGCTCCAAACC	9	162	NextSeq 500	High 75	2018-08-08	40	40	8	NA	ACGTAGGCCTAAATGGCTGTGAGAGAGCTCAG	GACCGTCGGCACTTTATCAATCTCGCTCCAAACC	GGTTTGGAGCGAGATTGATAAAGTGCCGACGGTC	NA
Rgt1_10aaD_genomic_B3	Rgt1 deletions	EcoRI-HF	400U	Genomic	B3	3C DNA	50 ng	CAAAGTTACCGCGCCAATCG	GATAGCTTCGGCGGCTAAGA	18	AATGATACGGCGACCACCGAGATCTACACACGTAGGCCTAAATGGCTGTGAGAGAGCTCAG	GCACTTTATCAATCTCGCTCCAAACCGATAGCTTCGGCGGCTAAGA	6	AATGATACGGCGACCACCGAGATCTACACACGTAGGCCTAAATGGCTGTGAGAGAGCTCAG	CAAGCAGAAGACGGCATACGAGATTGTTACCATAGACCGTCGGCACTTTATCAATCTCGCTCCAAACC	9	162	NextSeq 500	High 75	2018-08-08	40	40	8	NA	ACGTAGGCCTAAATGGCTGTGAGAGAGCTCAG	GACCGTCGGCACTTTATCAATCTCGCTCCAAACC	GGTTTGGAGCGAGATTGATAAAGTGCCGACGGTC	NA
Rgt1_muts_3C_1	Rgt1 domain deletions and phosphorylation site mutations	EcoRI-HF	400U	3C	1	3C DNA	8x50 ng	CAAAGTTACCGCGCCAATCG	GGCTTTACAGATTTTTGGAGTGG	25	AATGATACGGCGACCACCGAGATCTACACACGTAGGCCTAAATGGCTGTGAGAGAGCTCAG	GCACTTTATCAATCTCGCTCCAAACCGATAGCTTCGGCGGCTAAGA	10	AATGATACGGCGACCACCGAGATCTACACACGTAGGCCTAAATGGCTGTGAGAGAGCTCAG	CAAGCAGAAGACGGCATACGAGATTGTTATGTCCGACCGTCGGCACTTTATCAATCTCGCTCCAAACC	9	162	NextSeq 500	High 75	2019-01-20	37	37	8	8	ACGTAGGCCTAAATGGCTGTGAGAGAGCTCAG	GACCGTCGGCACTTTATCAATCTCGCTCCAAACC	GGTTTGGAGCGAGATTGATAAAGTGCCGACGGTC	CTGAGCTCTCTCACAGCCATTTAGGCCTACGT
Rgt1_muts_3C_2	Rgt1 domain deletions and phosphorylation site mutations	EcoRI-HF	400U	3C	2	3C DNA	8x50 ng	CAAAGTTACCGCGCCAATCG	GGCTTTACAGATTTTTGGAGTGG	25	AATGATACGGCGACCACCGAGATCTACACACGTAGGCCTAAATGGCTGTGAGAGAGCTCAG	GCACTTTATCAATCTCGCTCCAAACCGATAGCTTCGGCGGCTAAGA	10	AATGATACGGCGACCACCGAGATCTACACACGTAGGCCTAAATGGCTGTGAGAGAGCTCAG	CAAGCAGAAGACGGCATACGAGATTCTGTGAATGGACCGTCGGCACTTTATCAATCTCGCTCCAAACC	9	162	NextSeq 500	High 75	2019-01-20	37	37	8	8	ACGTAGGCCTAAATGGCTGTGAGAGAGCTCAG	GACCGTCGGCACTTTATCAATCTCGCTCCAAACC	GGTTTGGAGCGAGATTGATAAAGTGCCGACGGTC	CTGAGCTCTCTCACAGCCATTTAGGCCTACGT
Rgt1_muts_3C_3	Rgt1 domain deletions and phosphorylation site mutations	EcoRI-HF	400U	3C	3	3C DNA	8x50 ng	CAAAGTTACCGCGCCAATCG	GGCTTTACAGATTTTTGGAGTGG	25	AATGATACGGCGACCACCGAGATCTACACACGTAGGCCTAAATGGCTGTGAGAGAGCTCAG	GCACTTTATCAATCTCGCTCCAAACCGATAGCTTCGGCGGCTAAGA	10	AATGATACGGCGACCACCGAGATCTACACACGTAGGCCTAAATGGCTGTGAGAGAGCTCAG	CAAGCAGAAGACGGCATACGAGATGAACGACATTGACCGTCGGCACTTTATCAATCTCGCTCCAAACC	9	162	NextSeq 500	High 75	2019-01-20	37	37	8	8	ACGTAGGCCTAAATGGCTGTGAGAGAGCTCAG	GACCGTCGGCACTTTATCAATCTCGCTCCAAACC	GGTTTGGAGCGAGATTGATAAAGTGCCGACGGTC	CTGAGCTCTCTCACAGCCATTTAGGCCTACGT
Rgt1_muts_genomic_1	Rgt1 domain deletions and phosphorylation site mutations	EcoRI-HF	400U	Genomic	1	3C DNA	50 ng	CAAAGTTACCGCGCCAATCG	GATAGCTTCGGCGGCTAAGA	18	AATGATACGGCGACCACCGAGATCTACACACGTAGGCCTAAATGGCTGTGAGAGAGCTCAG	GCACTTTATCAATCTCGCTCCAAACCGATAGCTTCGGCGGCTAAGA	6	AATGATACGGCGACCACCGAGATCTACACACGTAGGCCTAAATGGCTGTGAGAGAGCTCAG	CAAGCAGAAGACGGCATACGAGATACCAGAGGTCGACCGTCGGCACTTTATCAATCTCGCTCCAAACC	9	162	NextSeq 500	High 75	2019-01-20	37	37	8	8	ACGTAGGCCTAAATGGCTGTGAGAGAGCTCAG	GACCGTCGGCACTTTATCAATCTCGCTCCAAACC	GGTTTGGAGCGAGATTGATAAAGTGCCGACGGTC	CTGAGCTCTCTCACAGCCATTTAGGCCTACGT
Rgt1_muts_genomic_2	Rgt1 domain deletions and phosphorylation site mutations	EcoRI-HF	400U	Genomic	2	3C DNA	50 ng	CAAAGTTACCGCGCCAATCG	GATAGCTTCGGCGGCTAAGA	18	AATGATACGGCGACCACCGAGATCTACACACGTAGGCCTAAATGGCTGTGAGAGAGCTCAG	GCACTTTATCAATCTCGCTCCAAACCGATAGCTTCGGCGGCTAAGA	6	AATGATACGGCGACCACCGAGATCTACACACGTAGGCCTAAATGGCTGTGAGAGAGCTCAG	CAAGCAGAAGACGGCATACGAGATGTTCAGACACGACCGTCGGCACTTTATCAATCTCGCTCCAAACC	9	162	NextSeq 500	High 75	2019-01-20	37	37	8	8	ACGTAGGCCTAAATGGCTGTGAGAGAGCTCAG	GACCGTCGGCACTTTATCAATCTCGCTCCAAACC	GGTTTGGAGCGAGATTGATAAAGTGCCGACGGTC	CTGAGCTCTCTCACAGCCATTTAGGCCTACGT
Rgt1_muts_genomic_3	Rgt1 domain deletions and phosphorylation site mutations	EcoRI-HF	400U	Genomic	3	3C DNA	50 ng	CAAAGTTACCGCGCCAATCG	GATAGCTTCGGCGGCTAAGA	18	AATGATACGGCGACCACCGAGATCTACACACGTAGGCCTAAATGGCTGTGAGAGAGCTCAG	GCACTTTATCAATCTCGCTCCAAACCGATAGCTTCGGCGGCTAAGA	6	AATGATACGGCGACCACCGAGATCTACACACGTAGGCCTAAATGGCTGTGAGAGAGCTCAG	CAAGCAGAAGACGGCATACGAGATATCGGTGGTAGACCGTCGGCACTTTATCAATCTCGCTCCAAACC	9	162	NextSeq 500	High 75	2019-01-20	37	37	8	8	ACGTAGGCCTAAATGGCTGTGAGAGAGCTCAG	GACCGTCGGCACTTTATCAATCTCGCTCCAAACC	GGTTTGGAGCGAGATTGATAAAGTGCCGACGGTC	CTGAGCTCTCTCACAGCCATTTAGGCCTACGT
