# Supplementary material for: A combination of transcription factors mediates inducible interchromosomal contacts
Source: eLife journal article supplement (doi:10.7554/elife.42499), 2019-05-13
Supplement: supp [file elife-42499-supp-v1.zip › elife_poa_e42499_Supplementary_file_4.xlsx]

## Sheet: Notes
Introduction
The Key Resources Table is designed to highlight the reagents and resources used in a specific study. Please include the genetically modified organisms and strains, cell lines, reagents, and software that are essential to reproduce the results presented. Note that datasets should be included in the datasets section of the submission form.
Please include a completed Key Resources Table at the start of the Materials and Methods section within your article file (this table does not need to be numbered). For consistency, please do not add subheadings to the table. Any references in the Source column should also be included in the list of references. Datasets should be entered within the datasets section of the submission form. A table…
The Key Resources Table does not need to be an exhaustive list of all the materials and resources used (e.g., essential chemicals and standard culture media do not need to be included). Please ensure that the items listed in the table are reported in the Materials and Methods section within the context of their use. We suggest that no more than ten primers and RNA sequences are included in this t…
Guidelines for creation of the Key Resources Table
Some of the constraints below are imposed to allow automated parsing of the table.
Columns (general):
(1) Column order and headings must be preserved.
(2) Columns A-E should not be removed, even if not used.
(3) Columns can be appended (F, G, etc.) for internal use.
Rows (general):
(1) Row titles (preceding the parentheses) must be preserved.
(2) Row one (column headings) should not be removed.
(3) Row 2 (headings with instructions) can be removed.
(4) Order of the rows can be changed.
(5) Clustering of multiple reagents of one type recommended, but is not mandatory.
(6) Reagent types indicated on template that are not used can be removed.
(7) Reagent types not represented in the template: use “other”.
Column A: Reagent type (mandatory)
(1) Row title (preceding parentheses) cannot be changed.
(2) See descriptions of categories in “Reagent categories” section below.
(3) If appropriate, include species within parentheses. Use full genus and full species for first mention; thereafter, initial for genus may be used.
(4) If appropriate, indicate sex after species (within the parentheses); separate by comma, space.
(5) See additional information in the section “Rows (general)” above.
Column B: Symbol/name used in publication (mandatory)
(1) This is a free-text field; there are no formatting constraints, except for separation of multiple entries by semi-colon, space.
(2) Should indicate exactly how the reagent is referred to in the publication. If several designations are used for one reagent, can include more than one entry, separated by semi-colon, space. If one designation has been used to refer to several different reagents, list each reagent separately and include a unique identifier or description parenthetically.
(3) If there is a semi-colon within the designation used, add double quotes around the entire phrase.
(4) Additional defining information can be included parenthetically (if brief).
Columns C: Source (mandatory)
(1) If reagent obtained from a public source, such as a stock center or company, list resource name.
(2) If not obtained from public source, but a published description is available, list the DOI or PMID for the publication.
(3) If reagent newly created in the publication, enter “this paper”.
(4) If none of the above, enter “other” and explain in Additional Information (Column E).
(5) If it is appropriate to indicate both a publication and a lab or researcher that provided the reagent, list the publication in this field and the lab or researcher in Additional Information.
Column D: Identifiers (not mandatory; use if possible)
(1) Use the format “ID_source:identifier” with a colon and no spaces. Separate multiple entries with a semi-colon, space.
(2) If possible, use the recommended abbreviation for the ID_source (see below).
(3) Multiple identifiers, even if redundant, are useful for validation. In some case a more general identifier (for a stock, for instance) can be combined with a more precise identifier (for the allele of interest in that stock).
(4) Inclusion of database identifiers is strongly encouraged to facilitate accurate incorporation of published data into appropriate biological databases.
Column E: Additional information
(1) Mandatory if column C entry is “this paper” or “other”. Description of new reagent or laboratory from which reagent obtained. (Free text)
(2) For antibodies, indicate dilution in parentheses (to avoid auto-formatting problems).
(3) Other pertinent information, including pointers to supplementary information or Methods section, if appropriate. (Free text)
Additional columns can be added for internal purposes (and removed prior to submission for publication): tracking acquisition by the lab, lab-specific stock numbers, storage location in the lab, comments about problems or QC, etc.
Reagent and resource categories
● Gene (indicate species) - not strictly a reagent, but unambiguous identification critical for genetic research and genetic databases.
● Strain, strain background (indicate species) - applies to whole organism; includes bacterial and virus strains or isolates. Indicate sex, if applicable.
● Genetic reagent (indicate species) - applies to mutations and variants in whole organism, including transgenically introduced constructs. For transgenic lines, indicate host species. Indicate sex, if applicable.
● Cell line (indicate species) - if a primary cell line, describe in Additional Information. Indicate sex, if applicable.
● Transfected construct (indicate species) - in cell line. Generally, indicate species of cell line; use species of construct component if that is more relevant and explain in Additional Information.
● Biological sample (indicate species) - any other biological entity, ranging from isolated tissue to defined population; describe in Additional Information. Indicate sex, if applicable.
● Antibody - include host organism common name and clonality (e.g., “mouse monoclonal”); include dilution used in Additional Information (within parentheses to avoid auto-formatting problems).
● Recombinant DNA reagent - traditional cultured clones, plasmids, cDNAs, etc., including recombinant DNA libraries.
● Sequence-based reagent - oligonucleotides, primers, morpholinos, etc.; indicate sequence.
● Peptide, recombinant protein - generally, commercially available reagents.
● Chemical compound, drug - generally, commercially available reagents.
● Commercial assay, kit - detection assays; labeling and sample preparation kits.
● Software, algorithm - newly created or previously existing.
● Other - miscellaneous other categories, including histological stains.

## Sheet: Example
Reagent type. Duplicate rows as needed. Order is flexible, but row titles must be preserved. Species (mandatory if applicable). Append in parentheses. First mention, use full genus.	Designation. Symbol/name used in publication. Separate multiple entries with semi-colon, space. (If semi-colon within designation, delimit wtith double quotes.)	Source (public). Stock center, company, data repository. Reference. Include PMID or doi; use “this paper” if new. If neither applies enter “other” and explain in Additional Information.	Identifiers. Format as ID_source:identifier. Separate multiple entries with semi-colon, space. Include catalog numbers, stock numbers, database IDs or accession numbers, RRIDs.	Additional information. Mandatory if column C entry is “this paper” or “other”. Description of new reagent; laboratory from which reagent obtained; other pertinent information.
Key Resources Table
Reagent type (species) or resource	Designation	Source or reference	Identifiers	Additional information
gene (Drosophila melanogaster)	nito	NA	FLYB:FBgn0027548
gene (D. melanogaster)	Sxl	NA	FLYB:FBgn0264270
genetic reagent (D. melanogaster)	MTD-Gal4	Bloomington Drosophila Stock Center	BDSC:31777; FLYB:FBtp0001612; RRID:BDSC_31777	FlyBase symbol: P{GAL4-nos.NGT}
genetic reagent (D. melanogaster)	ap-Gal4	Bloomington Drosophila Stock Center	BDSC:3041; FLYB:FBti0002785; RRID:BDSC_3041	FlyBase symbol: P{GawB}ap[md544]
genetic reagent (D. melanogaster)	nub-Gal4	PMID:20798049	FLYB:FBti0016825	FlyBase symbol: P{GawB}nubbin-AC-62
genetic reagent (D. melanogaster)	dome-Gal4	PMID:12403714	FLYB:FBti0022298	FlyBase symbol: P{GawB}dome[PG14]
genetic reagent (D. melanogaster)	UAS-2xEYFP	PMID:12324968	FLYB:FBtp0016537	FlyBase symbol: P{UAS-2xEYFP}
genetic reagent (D. melanogaster)	nito[HP25329]	Bloomington Drosophila Stock Center	BDSC:22092; FLYB:FBal0238892; RRID:BDSC_22092	Genotype: w[1118]; P{w[+mC]=EPg}nito[HP25329]/CyO
genetic reagent (D. melanogaster)	nito[1]	this paper		Progenitor = nito[HP25329]; imprecise excision; lethal
genetic reagent (D. melanogaster)	nito shRNA (HMJ02081)	Bloomington Drosophila Stock Center	TRiP:HMJ02081; BDSC:56852; RRID:BDSC_56852	FlyBase symbol: P{TRiP.HMJ02081}attP40
genetic reagent (D. melanogaster)	nito dsRNA (VDRC 20942)	Vienna Drosophila RNAi Center	VDRC:20942
genetic reagent (D. melanogaster)	FRT[G13]	Bloomington Drosophila Stock Center	BDSC:1956; FLYB:FBti0001247	FlyBase symbol: P{FRT(whs)}G13
genetic reagent (D. melanogaster)	"y w hsflp; ubiGFP FRT[G13]"	PMID:18160348
cell line (D. melanogaster)	S2	other	FLYB:FBtc0000181; RRID:CVCL_Z992	Cell line maintained in N. Perrimon lab; FlyBase symbol: S2-DRSC.
antibody	anti-Nito	this paper		Rabbit polyclonal; against aa 479-500; used YZ3137 (1:500)
antibody	anti-alpha-Spectrin (mouse monoclonal)	Developmental Studies Hybridoma Bank	DSHB:3A9; RRID:AB_528473	(1:10)
antibody	anti-Vasa (rabbit polyclonal)	Santa Cruz Biotechnology	Santa Cruz:sc-30210; RRID:AB_793874	(1:250)
antibody	anti-Sxl (mouse monoclonal)	Developmental Studies Hybridoma Bank	DSHB:M18; RRID:AB_528464	(1:10)
antibody	anti-GFP (rabbit polyclonal)	Molecular Probes	Molecular Probes:A-6455; RRID:AB_221570	(1:1000)
antibody	anti-GFP (mouse monoclonal)	Molecular Probes	Molecular Probes:A-11120; RRID:AB_221568	(1:200)
antibody	anti-HA (rat monoclonal)	Roche	Roche:3F10; RRID:AB_2314622
antibody	Alexa 488- or 555- secondaries	Molecular Probes		(1:1000)
other	DAPI stain	Molecular Probes		(1:1000)
recombinant DNA reagent	pAGW (Gateway vector)	Drosophila Genomics Resource Center	DGRC:1071
recombinant DNA reagent	pAHW (Gateway vector)	Drosophila Genomics Resource Center	DGRC:1095
recombinant DNA reagent	GH11110 (cDNA)	Drosophila Genomics Resource Center	DGRC:5666
recombinant DNA reagent	GFP-Nito (plasmid)	this paper		Progenitors: GH11110 (cDNA); Gateway vector pAGW
recombinant DNA reagent	HA-Sxl (plasmid)	PMID:16207758		Progentiors: PCR, UAS-Sxl flies; Gateway vector pAHW
recombinant DNA reagent	GFP-Sxl (plasmid)	PMID:16207758		Progentiors: PCR, UAS-Sxl flies; Gateway vector pAGW

## Sheet: Template
Reagent type. Duplicate rows as needed. Order is flexible, but row titles must be preserved. Species (mandatory if applicable). Append in parentheses. First mention, use full genus. Sex (if applicable). Add within parentheses after species.	Designation. Symbol/name used in publication. Separate multiple entries with semi-colon, space. (If semi-colon within designation, delimit wtith double quotes.)	Source (public). Stock center, company, data repository. Reference. Include PMID or DOI; use “this paper” if new. If neither applies enter “other” and explain in Additional Information.	Identifiers. Format as ID_source:identifier. Separate multiple entries with semi-colon, space. Include catalog numbers, stock numbers, database IDs or accession numbers, RRIDs.	Additional information. Mandatory if column C entry is “this paper” or “other”. Description of new reagent; laboratory from which reagent obtained; other pertinent information. For antibodies, indicate dilution and conditions used.
Key Resources Table
Reagent type (species) or resource	Designation	Source or reference	Identifiers	Additional information
gene (Saccharomyces cerevisiae)	ABF1	NA	SGD:YKL112W
gene (S. cerevisiae)	ABF2	NA	SGD:YMR072W
gene (S. cerevisiae)	ACE2	NA	SGD:YLR131C
gene (S. cerevisiae)	ACT1	NA	SGD:YFL039C
gene (S. cerevisiae)	ADR1	NA	SGD:YDR216W
gene (S. cerevisiae)	AFT1	NA	SGD:YGL071W
gene (S. cerevisiae)	AGA2	NA	SGD:YGL032C
gene (S. cerevisiae)	AIM26	NA	SGD:YKL037W
gene (S. cerevisiae)	ARG5	NA	SGD:YER069W
gene (S. cerevisiae)	ARO80	NA	SGD:YDR421W
gene (S. cerevisiae)	ASG1	NA	SGD:YIL130W
gene (S. cerevisiae)	ASH1	NA	SGD:YKL185W
gene (S. cerevisiae)	ASM4	NA	SGD:YDL088C
gene (S. cerevisiae)	AZF1	NA	SGD:YOR113W
gene (S. cerevisiae)	BAS1	NA	SGD:YKR099W
gene (S. cerevisiae)	BLI1	NA	SGD:YKL061W
gene (S. cerevisiae)	CAD1	NA	SGD:YDR423C
gene (S. cerevisiae)	CAT8	NA	SGD:YMR280C
gene (S. cerevisiae)	CBF1	NA	SGD:YJR060W
gene (S. cerevisiae)	CCS1	NA	SGD:YMR038C
gene (S. cerevisiae)	CEP3	NA	SGD:YMR168C
gene (S. cerevisiae)	CEX1	NA	SGD:YOR112W
gene (S. cerevisiae)	CHA4	NA	SGD:YLR098C
gene (S. cerevisiae)	CHZ1	NA	SGD:YER030W
gene (S. cerevisiae)	CIN5	NA	SGD:YOR028C
gene (S. cerevisiae)	CMR3	NA	SGD:YPR013C
gene (S. cerevisiae)	COM2	NA	SGD:YER130C
gene (S. cerevisiae)	COQ4	NA	SGD:YDR204W
gene (S. cerevisiae)	CRZ1	NA	SGD:YNL027W
gene (S. cerevisiae)	CST6	NA	SGD:YIL036W
gene (S. cerevisiae)	CUP2	NA	SGD:YGL166W
gene (S. cerevisiae)	CUP9	NA	SGD:YPL177C
gene (S. cerevisiae)	DAL80	NA	SGD:YKR034W
gene (S. cerevisiae)	DAL82	NA	SGD:YNL314W
gene (S. cerevisiae)	DAT1	NA	SGD:YML113W
gene (S. cerevisiae)	DOT6	NA	SGD:YER088C
gene (S. cerevisiae)	EBS1	NA	SGD:YDR206W
gene (S. cerevisiae)	ECM22	NA	SGD:YLR228C
gene (S. cerevisiae)	ECM23	NA	SGD:YPL021W
gene (S. cerevisiae)	EDS1	NA	SGD:YBR033W
gene (S. cerevisiae)	ERT1	NA	SGD:YBR239C
gene (S. cerevisiae)	FHL1	NA	SGD:YPR104C
gene (S. cerevisiae)	FIT1	NA	SGD:YDR534C
gene (S. cerevisiae)	FKH1	NA	SGD:YIL131C
gene (S. cerevisiae)	FKH2	NA	SGD:YNL068C
gene (S. cerevisiae)	FMP27	NA	SGD:YLR454W
gene (S. cerevisiae)	FPR4	NA	SGD:YLR449W
gene (S. cerevisiae)	FYV5	NA	SGD:YCL058C
gene (S. cerevisiae)	GAL4	NA	SGD:YPL248C
gene (S. cerevisiae)	GAL83	NA	SGD:YER027C
gene (S. cerevisiae)	GAT1	NA	SGD:YFL021W
gene (S. cerevisiae)	GAT3	NA	SGD:YLR013W
gene (S. cerevisiae)	GAT4	NA	SGD:YIR013C
gene (S. cerevisiae)	GCN4	NA	SGD:YEL009C
gene (S. cerevisiae)	GCR1	NA	SGD:YPL075W
gene (S. cerevisiae)	GDH1	NA	SGD:YOR375C
gene (S. cerevisiae)	GIS1	NA	SGD:YDR096W
gene (S. cerevisiae)	GLE2	NA	SGD:YER107C
gene (S. cerevisiae)	GLN3	NA	SGD:YER040W
gene (S. cerevisiae)	GPA2	NA	SGD:YER020W
gene (S. cerevisiae)	GSM1	NA	SGD:YJL103C
gene (S. cerevisiae)	GYP5	NA	SGD:YPL249C
gene (S. cerevisiae)	GZF3	NA	SGD:YJL110C
gene (S. cerevisiae)	HAA1	NA	SGD:YPR008W
gene (S. cerevisiae)	HAC1	NA	SGD:YFL031W
gene (S. cerevisiae)	HAL9	NA	SGD:YOL089C
gene (S. cerevisiae)	HAS1	NA	SGD:YMR290C
gene (S. cerevisiae)	HCM1	NA	SGD:YCR065W
gene (S. cerevisiae)	HLR1	NA	SGD:YDR528W
gene (S. cerevisiae)	HMG2	NA	SGD:YLR450W
gene (S. cerevisiae)	HOF1	NA	SGD:YMR032W
gene (S. cerevisiae)	HOP2	NA	SGD:YGL033W
gene (S. cerevisiae)	HSF1	NA	SGD:YGL073W
gene (S. cerevisiae)	HXT1	NA	SGD:YHR094C
gene (S. cerevisiae)	HXT3	NA	SGD:YDR345C
gene (S. cerevisiae)	ICY2	NA	SGD:YPL250C
gene (S. cerevisiae)	ILV2	NA	SGD:YMR108W
gene (S. cerevisiae)	INP53	NA	SGD:YOR109W
gene (S. cerevisiae)	KEX1	NA	SGD:YGL203C
gene (S. cerevisiae)	LCB1	NA	SGD:YMR296C
gene (S. cerevisiae)	LEU3	NA	SGD:YLR451W
gene (S. cerevisiae)	LYS14	NA	SGD:YDR034C
gene (S. cerevisiae)	MBP1	NA	SGD:YDL056W
gene (S. cerevisiae)	MCM1	NA	SGD:YMR043W
gene (S. cerevisiae)	MET31	NA	SGD:YPL038W
gene (S. cerevisiae)	MET32	NA	SGD:YDR253C
gene (S. cerevisiae)	MGA1	NA	SGD:YGR249W
gene (S. cerevisiae)	MIG1	NA	SGD:YGL035C
gene (S. cerevisiae)	MIG2	NA	SGD:YGL209W
gene (S. cerevisiae)	MIG3	NA	SGD:YER028C
gene (S. cerevisiae)	MIH1	NA	SGD:YMR036C
gene (S. cerevisiae)	MLP1	NA	SGD:YKR095W
gene (S. cerevisiae)	MLP2	NA	SGD:YIL149C
gene (S. cerevisiae)	MNR2	NA	SGD:YKL064W
gene (S. cerevisiae)	MOT2	NA	SGD:YER068W
gene (S. cerevisiae)	MOT3	NA	SGD:YMR070W
gene (S. cerevisiae)	MSC2	NA	SGD:YDR205W
gene (S. cerevisiae)	MSN1	NA	SGD:YOL116W
gene (S. cerevisiae)	MSN2	NA	SGD:YMR037C
gene (S. cerevisiae)	MSN4	NA	SGD:YKL062W
gene (S. cerevisiae)	MTH1	NA	SGD:YDR277C
gene (S. cerevisiae)	NCS6	NA	SGD:YGL211W
gene (S. cerevisiae)	NFU1	NA	SGD:YKL040C
gene (S. cerevisiae)	NHP10	NA	SGD:YDL002C
gene (S. cerevisiae)	NHP6A	NA	SGD:YPR052C
gene (S. cerevisiae)	NRG1	NA	SGD:YDR043C
gene (S. cerevisiae)	NRG2	NA	SGD:YBR066C
gene (S. cerevisiae)	NUP1	NA	SGD:YOR098C
gene (S. cerevisiae)	NUP116	NA	SGD:YMR047C
gene (S. cerevisiae)	NUP120	NA	SGD:YKL057C
gene (S. cerevisiae)	NUP133	NA	SGD:YKR082W
gene (S. cerevisiae)	NUP159	NA	SGD:YIL115C
gene (S. cerevisiae)	NUP170	NA	SGD:YBL079W
gene (S. cerevisiae)	NUP188	NA	SGD:YML103C
gene (S. cerevisiae)	NUP192	NA	SGD:YJL039C
gene (S. cerevisiae)	NUP2	NA	SGD:YLR335W
gene (S. cerevisiae)	NUP42	NA	SGD:YDR192C
gene (S. cerevisiae)	NUP49	NA	SGD:YGL172W
gene (S. cerevisiae)	NUP53	NA	SGD:YMR153W
gene (S. cerevisiae)	NUP57	NA	SGD:YGR119C
gene (S. cerevisiae)	NUP60	NA	SGD:YAR002W
gene (S. cerevisiae)	NUP82	NA	SGD:YJL061W
gene (S. cerevisiae)	NUP84	NA	SGD:YDL116W
gene (S. cerevisiae)	NUP85	NA	SGD:YJR042W
gene (S. cerevisiae)	PDR1	NA	SGD:YGL013C
gene (S. cerevisiae)	PDR8	NA	SGD:YLR266C
gene (S. cerevisiae)	PHD1	NA	SGD:YKL043W
gene (S. cerevisiae)	PHO2	NA	SGD:YDL106C
gene (S. cerevisiae)	PHO4	NA	SGD:YFR034C
gene (S. cerevisiae)	PNC1	NA	SGD:YGL037C
gene (S. cerevisiae)	POM152	NA	SGD:YMR129W
gene (S. cerevisiae)	POX1	NA	SGD:YGL205W
gene (S. cerevisiae)	PPR1	NA	SGD:YLR014C
gene (S. cerevisiae)	PRM1	NA	SGD:YNL279W
gene (S. cerevisiae)	PTM1	NA	SGD:YKL039W
gene (S. cerevisiae)	PUT3	NA	SGD:YKL015W
gene (S. cerevisiae)	PZF1	NA	SGD:YPR186C
gene (S. cerevisiae)	RAP1	NA	SGD:YNL216W
gene (S. cerevisiae)	RBD2	NA	SGD:YPL246C
gene (S. cerevisiae)	RDR1	NA	SGD:YOR380W
gene (S. cerevisiae)	RDS1	NA	SGD:YCR106W
gene (S. cerevisiae)	RDS2	NA	SGD:YPL133C
gene (S. cerevisiae)	REB1	NA	SGD:YBR049C
gene (S. cerevisiae)	REI1	NA	SGD:YBR267W
gene (S. cerevisiae)	RFX1	NA	SGD:YLR176C
gene (S. cerevisiae)	RGM1	NA	SGD:YMR182C
gene (S. cerevisiae)	RGT1	NA	SGD:YKL038W
gene (S. cerevisiae)	RIF2	NA	SGD:YLR453C
gene (S. cerevisiae)	RLM1	NA	SGD:YPL089C
gene (S. cerevisiae)	RME1	NA	SGD:YGR044C
gene (S. cerevisiae)	RNQ1	NA	SGD:YCL028W
gene (S. cerevisiae)	ROX1	NA	SGD:YPR065W
gene (S. cerevisiae)	RPH1	NA	SGD:YER169W
gene (S. cerevisiae)	RPL36B	NA	SGD:YPL249C-A
gene (S. cerevisiae)	RPL6B	NA	SGD:YLR448W
gene (S. cerevisiae)	RPN4	NA	SGD:YDL020C
gene (S. cerevisiae)	RSF2	NA	SGD:YJR127C
gene (S. cerevisiae)	RTC5	NA	SGD:YOR118W
gene (S. cerevisiae)	RTG3	NA	SGD:YBL103C
gene (S. cerevisiae)	SDD4	NA	SGD:YPR022C
gene (S. cerevisiae)	SFL1	NA	SGD:YOR140W
gene (S. cerevisiae)	SFP1	NA	SGD:YLR403W
gene (S. cerevisiae)	SIP2	NA	SGD:YGL208W
gene (S. cerevisiae)	SIP4	NA	SGD:YJL089W
gene (S. cerevisiae)	SKN7	NA	SGD:YHR206W
gene (S. cerevisiae)	SKO1	NA	SGD:YNL167C
gene (S. cerevisiae)	SKS1	NA	SGD:YPL026C
gene (S. cerevisiae)	SMP1	NA	SGD:YBR182C
gene (S. cerevisiae)	SOK2	NA	SGD:YMR016C
gene (S. cerevisiae)	SPT10	NA	SGD:YJL127C
gene (S. cerevisiae)	SPT15	NA	SGD:YER148W
gene (S. cerevisiae)	SSN6	NA	SGD:YBR112C
gene (S. cerevisiae)	SST2	NA	SGD:YLR452C
gene (S. cerevisiae)	STB3	NA	SGD:YDR169C
gene (S. cerevisiae)	STB4	NA	SGD:YMR019W
gene (S. cerevisiae)	STB5	NA	SGD:YHR178W
gene (S. cerevisiae)	STD1	NA	SGD:YOR047C
gene (S. cerevisiae)	STE12	NA	SGD:YHR084W
gene (S. cerevisiae)	STP1	NA	SGD:YDR463W
gene (S. cerevisiae)	STP2	NA	SGD:YHR006W
gene (S. cerevisiae)	STP3	NA	SGD:YLR375W
gene (S. cerevisiae)	STP4	NA	SGD:YDL048C
gene (S. cerevisiae)	SUA7	NA	SGD:YPR086W
gene (S. cerevisiae)	SUB1	NA	SGD:YMR039C
gene (S. cerevisiae)	SUM1	NA	SGD:YDR310C
gene (S. cerevisiae)	SUT1	NA	SGD:YGL162W
gene (S. cerevisiae)	SUT2	NA	SGD:YPR009W
gene (S. cerevisiae)	SWI4	NA	SGD:YER111C
gene (S. cerevisiae)	SWI5	NA	SGD:YDR146C
gene (S. cerevisiae)	TBF1	NA	SGD:YPL128C
gene (S. cerevisiae)	TBS1	NA	SGD:YBR150C
gene (S. cerevisiae)	TDA1	NA	SGD:YMR291W
gene (S. cerevisiae)	TDA9	NA	SGD:YML081W
gene (S. cerevisiae)	TEA1	NA	SGD:YOR337W
gene (S. cerevisiae)	TEC1	NA	SGD:YBR083W
gene (S. cerevisiae)	TMA19	NA	SGD:YKL056C
gene (S. cerevisiae)	TOD6	NA	SGD:YBL054W
gene (S. cerevisiae)	TOG1	NA	SGD:YER184C
gene (S. cerevisiae)	TOS8	NA	SGD:YGL096W
gene (S. cerevisiae)	TRS33	NA	SGD:YOR115C
gene (S. cerevisiae)	TUL1	NA	SGD:YKL034W
gene (S. cerevisiae)	TUP1	NA	SGD:YCR084C
gene (S. cerevisiae)	TYE7	NA	SGD:YOR344C
gene (S. cerevisiae)	UGA3	NA	SGD:YDL170W
gene (S. cerevisiae)	UME6	NA	SGD:YDR207C
gene (S. cerevisiae)	UPC2	NA	SGD:YDR213W
gene (S. cerevisiae)	URC2	NA	SGD:YDR520C
gene (S. cerevisiae)	USV1	NA	SGD:YPL230W
gene (S. cerevisiae)	VAM7	NA	SGD:YGL212W
gene (S. cerevisiae)	VHR1	NA	SGD:YIL056W
gene (S. cerevisiae)	VHR2	NA	SGD:YER064C
gene (S. cerevisiae)	VIK1	NA	SGD:YPL253C
gene (S. cerevisiae)	VPS24	NA	SGD:YKL041W
gene (S. cerevisiae)	WAR1	NA	SGD:YML076C
gene (S. cerevisiae)	XBP1	NA	SGD:YIL101C
gene (S. cerevisiae)	YAP1	NA	SGD:YML007W
gene (S. cerevisiae)	YAP3	NA	SGD:YHL009C
gene (S. cerevisiae)	YAP6	NA	SGD:YDR259C
gene (S. cerevisiae)	YAP7	NA	SGD:YOL028C
gene (S. cerevisiae)	YAT2	NA	SGD:YER024W
gene (S. cerevisiae)	YDR210W	NA	SGD:YDR210W
gene (S. cerevisiae)	YET1	NA	SGD:YKL065C
gene (S. cerevisiae)	YET2	NA	SGD:YMR040W
gene (S. cerevisiae)	YGL036W	NA	SGD:YGL036W
gene (S. cerevisiae)	YGL039W	NA	SGD:YGL039W
gene (S. cerevisiae)	YGR067C	NA	SGD:YGR067C
gene (S. cerevisiae)	YHP1	NA	SGD:YDR451C
gene (S. cerevisiae)	YKL033W-A	NA	SGD:YKL033W-A
gene (S. cerevisiae)	YKL063C	NA	SGD:YKL063C
gene (S. cerevisiae)	YKR075C	NA	SGD:YKR075C
gene (S. cerevisiae)	YMR034C	NA	SGD:YMR034C
gene (S. cerevisiae)	YOR062C	NA	SGD:YOR062C
gene (S. cerevisiae)	YOR111W	NA	SGD:YOR111W
gene (S. cerevisiae)	YOR114W	NA	SGD:YOR114W
gene (S. cerevisiae)	YOX1	NA	SGD:YML027W
gene (S. cerevisiae)	YPL245W	NA	SGD:YPL245W
gene (S. cerevisiae)	YPL247C	NA	SGD:YPL247C
gene (S. cerevisiae)	YPT31	NA	SGD:YER031C
gene (S. cerevisiae)	YPT32	NA	SGD:YGL210W
gene (S. cerevisiae)	YRM1	NA	SGD:YOR172W
gene (S. cerevisiae)	ZAP1	NA	SGD:YJL056C
gene (S. cerevisiae)	ZRG8	NA	SGD:YER033C
strain, strain background (Saccharomyces uvarum)	YZB5-113 (YMD377)	other		From Yixian Zheng; MATα ho::HphMX lys2-1 ura3::NatMX
strain, strain background (S. cerevisiae x S. uvarum)	YMS366	other		From Monica Sanchez; ura3
strain, strain background (S. cerevisiae)	BY4741 (YMD2177)	PMID:9483801		MATa his3Δ1 leu2Δ0 met15Δ0 ura3Δ0
strain, strain background (S. cerevisiae)	BY4742 (YMD2220)	PMID:9483801		MATα his3Δ1 leu2Δ0 lys2Δ0 ura3Δ0
strain, strain background (S. cerevisiae x S. uvarum)	ILY456 (YMD3259)	PMID:28537556		S. cerevisiae (MATα) x S. uvarum (MATa) Su ho::KanMX Su ura3
genetic reagent (S. cerevisiae x S. uvarum)	YMD3919	this paper		Derived from YMS366; Sc has1pr-tda1prΔ::URA3
genetic reagent (S. cerevisiae x S. uvarum)	YMD3920	this paper		Derived from YMS366; Sc HAS1pr::GATC
genetic reagent (S. cerevisiae)	YMD3921	this paper		BY4741 background; fit1Δ::pairing-URA3
genetic reagent (S. cerevisiae)	YMD3922	this paper		BY4741 background; fit1Δ::nonpairing-URA3
genetic reagent (S. cerevisiae)	Leu3-TAP	PMID:14562106		BY4741 background; LEU3-TAP <HIS>
genetic reagent (S. cerevisiae)	Sdd4-TAP	PMID:14562106		BY4741 background; SDD4-TAP <HIS>
genetic reagent (S. cerevisiae)	Rgt1-TAP	PMID:14562106		BY4741 background; RGT1-TAP <HIS>
genetic reagent (S. cerevisiae)	Z3EVpr-LEU3	other		From R. Scott McIsaac; MATa HAP1+::NatMX::pACT1-Z3EV-ENO2term ura3Δ0 can1Δ::Ste2pr-Sphis5 his3Δ1 lypΔ0 URA3-Z3EVpr-LEU3
genetic reagent (S. cerevisiae)	Z3EVpr-SDD4	other		From R. Scott McIsaac; MATa HAP1+::NatMX::pACT1-Z3EV-ENO2term ura3Δ0 can1Δ::Ste2pr-Sphis5 his3Δ1 lypΔ0 URA3-Z3EVpr-SDD4
genetic reagent (S. cerevisiae)	Z3EVpr-RGT1	other		From R. Scott McIsaac; MATa HAP1+::NatMX::pACT1-Z3EV-ENO2term ura3Δ0 can1Δ::Ste2pr-Sphis5 his3Δ1 lypΔ0 URA3-Z3EVpr-RGT1
genetic reagent (S. cerevisiae x S. uvarum)	YMD3923	this paper		Z3EVpr-LEU3 crossed with YZB5-113
genetic reagent (S. cerevisiae x S. uvarum)	YMD3924	this paper		Z3EVpr-SDD4 crossed with YZB5-113
genetic reagent (S. cerevisiae x S. uvarum)	YMD3925	this paper		Z3EVpr-RGT1 crossed with YZB5-113
genetic reagent (S. cerevisiae x S. uvarum)	YMD3266	PMID:28537556		Derived from ILY456; Sc ngl2-ymr295cΔ::HphMX
genetic reagent (S. cerevisiae x S. uvarum)	YMD3267	PMID:28537556		Derived from ILY456; Sc has1Δ::HphMX
genetic reagent (S. cerevisiae x S. uvarum)	YMD3268	PMID:28537556		Derived from ILY456; Sc has1Δcoding::HphMX
genetic reagent (S. cerevisiae x S. uvarum)	YMD3269	PMID:28537556		Derived from ILY456; Sc has1Δpr::HphMX
genetic reagent (S. cerevisiae)	MATa SGA reporter WT	PMID:11743205		BY4741 background; can1Δ::LEU2-MFA1pr-HIS3
genetic reagent (S. cerevisiae x S. uvarum)	ScHAS1pr-TDA1pr_WT (YMD4026, YMD4027, YMD4028)	this paper		Derived from BY4741; transformed to replace the pairing region with URA3, and then transformed with wild type ScHAS1pr-TDA1pr sequence and mated with YZB5-113
genetic reagent (S. cerevisiae x S. uvarum)	ScHAS1pr-TDA1pr_leu3 (YMD4029, YMD4030, YMD4031)	this paper		Derived from BY4741; transformed to replace the pairing region with URA3, and then transformed with ScHAS1pr-TDA1pr sequence with a mutant Leu3 binding site and mated with YZB5-113
genetic reagent (S. cerevisiae x S. uvarum)	ScHAS1pr-TDA1pr_rgt1x2 (YMD4032, YMD4033, YMD4034)	this paper		Derived from BY4741; transformed to replace the pairing region with URA3, and then transformed with ScHAS1pr-TDA1pr sequence with mutant Rgt1 binding site and mated with YZB5-113
genetic reagent (S. cerevisiae)	MATα yeast deletion collection	PMID:12140549		BY4742 background
genetic reagent (S. cerevisiae)	MATa SGA reporter yeast deletion collection	PMID:11743205		BY4741 background; can1Δ::LEU2-MFA1pr-HIS3
recombinant DNA reagent	GAL1pr-RGT1-6xHis-HA-3C-pA	Dharmacon	YSC3867
recombinant DNA reagent	pUC19	PMID:2985470
recombinant DNA reagent	pSH47	PMID:8692690
recombinant DNA reagent	KanMX-ScHAS1pr plasmid	this paper		Derived from pUC19; 400 bp of homology to Sc HAS1, then KanMX, then GATC sequence, then Sc HAS1pr-TDA1pr and 203 bp of homology to Sc TDA1.
recombinant DNA reagent	pairing-URA3 plasmid	this paper		Derived from pUC19; pairing region (-511 to -694 relative to HAS1), then GAATTC (EcoRI site), and then URA3.
recombinant DNA reagent	nonpairing-URA3 plasmid	this paper		Derived from pUC19; non-pairing region (-209 to -394 relative to HAS1), then GAATTC (EcoRI site), and then URA3.
recombinant DNA reagent	pairing-URA3-RGT1 plasmid	this paper		Derived from pairing-URA3 plasmid; RGT1 was cloned with 537 bp of upstream sequence and 221 bp of downstream sequence.
recombinant DNA reagent	pairing-URA3-RGT1 10aa deletion plasmids	this paper		Derived from pairing-URA3-RGT1 plasmid; cloned in two halves, with junctions at the AmpR sequence and the deletion position.
recombinant DNA reagent	pairing-URA3-RGT1 ΔZn finger domain plasmid	this paper		Derived from pairing-URA3 plasmid; RGT1 was cloned with 537 bp of upstream sequence and 221 bp of downstream sequence, in two pieces: one upstream and one downstream of the deleted region (amino acids 32-90).
recombinant DNA reagent	pairing-URA3-RGT1 ΔQ/N-rich domain plasmid	this paper		Derived from pairing-URA3 plasmid; RGT1 was cloned with 537 bp of upstream sequence and 221 bp of downstream sequence, in two pieces: one upstream and one downstream of the deleted region (amino acids 293-459).
recombinant DNA reagent	pairing-URA3-RGT1 ΔC-terminal domain plasmid	this paper		Derived from pairing-URA3 plasmid; RGT1 was cloned with 537 bp of upstream sequence and 221 bp of downstream sequence, in two pieces: one upstream and one downstream of the deleted region (amino acids 461-1163).
recombinant DNA reagent	pairing-URA3-RGT1 S88A plasmid	this paper		Derived from pairing-URA3 plasmid; RGT1 was cloned with 537 bp of upstream sequence and 221 bp of downstream sequence, in two pieces: one upstream and one downstream of the mutated position.
recombinant DNA reagent	pairing-URA3-RGT1 S758A plasmid	this paper		Derived from pairing-URA3 plasmid; RGT1 was cloned with 537 bp of upstream sequence and 221 bp of downstream sequence, in two pieces: one upstream and one downstream of the mutated position.
recombinant DNA reagent	ScHAS1pr-TDA1pr WT plasmid	this paper		Derived from pUC19; S. cerevisiae HAS1pr-TDA1pr region with 400 bp of homology to Sc HAS1 and 203 bp of homology to Sc TDA1.
recombinant DNA reagent	ScHAS1pr-TDA1pr leu3 plasmid	this paper		Derived from ScHAS1pr-TDA1pr_WT plasmid; reamplified with primers introducing Leu3 binding site mutations, and recircularized.
recombinant DNA reagent	ScHAS1pr-TDA1pr rgt1x2 plasmid	this paper		Derived from ScHAS1pr-TDA1pr_WT plasmid; reamplified with primers introducingRgt1 binding site mutations, and recircularized.
commercial assay or kit	GeneMorph II Random Mutagenesis kit	Agilent	200550
commercial assay or kit	Truseq RNA Library Prep kit v2	Illumina	RS-122-2001
commercial assay or kit	Truseq Stranded mRNA Library Prep kit	Illumina	20020595; 20022371
commercial assay or kit	Accel-NGS 2S Plus DNA Library Prep kit	Swift Biosciences	21024; 28096
software, algorithm	PEAR v0.9.5	https://github.com/tseemann/PEAR
software, algorithm	cutadapt v1.8.3	https://cutadapt.readthedocs.io
software, algorithm	Bowtie 2 v2.2.3	http://bowtie-bio.sourceforge.net/bowtie2/
software, algorithm	samtools v1.3.1	http://www.htslib.org/
software, algorithm	bedtools v2.26.0	https://bedtools.readthedocs.io
software, algorithm	MACS v2.1.0	https://github.com/taoliu/MACS/
software, algorithm	MEME suite v4.12.0	http://meme-suite.org/
software, algorithm	R v3.3.2	https://www.r-project.org/
software, algorithm	ggplot	https://ggplot2.tidyverse.org/
software, algorithm	HTSeq v0.6.1	https://htseq.readthedocs.io
software, algorithm	DESeq2	https://bioconductor.org/packages/release/bioc/html/DESeq2.html
software, algorithm	UCSC Genome Browser	https://genome.ucsc.edu/cgi-bin/hgGateway
software, algorithm	IUPred2	https://iupred2a.elte.hu/
software, algorithm	Jpred4	http://www.compbio.dundee.ac.uk/jpred/
software, algorithm	YeTFaSCo v1.02	http://yetfasco.ccbr.utoronto.ca/
software, algorithm	ggseqlogo	https://omarwagih.github.io/ggseqlogo/
