# Supplementary figures and images for: A combination of transcription factors mediates inducible interchromosomal contacts
Source: eLife journal article supplement (doi:10.7554/elife.42499), 2019-05-13

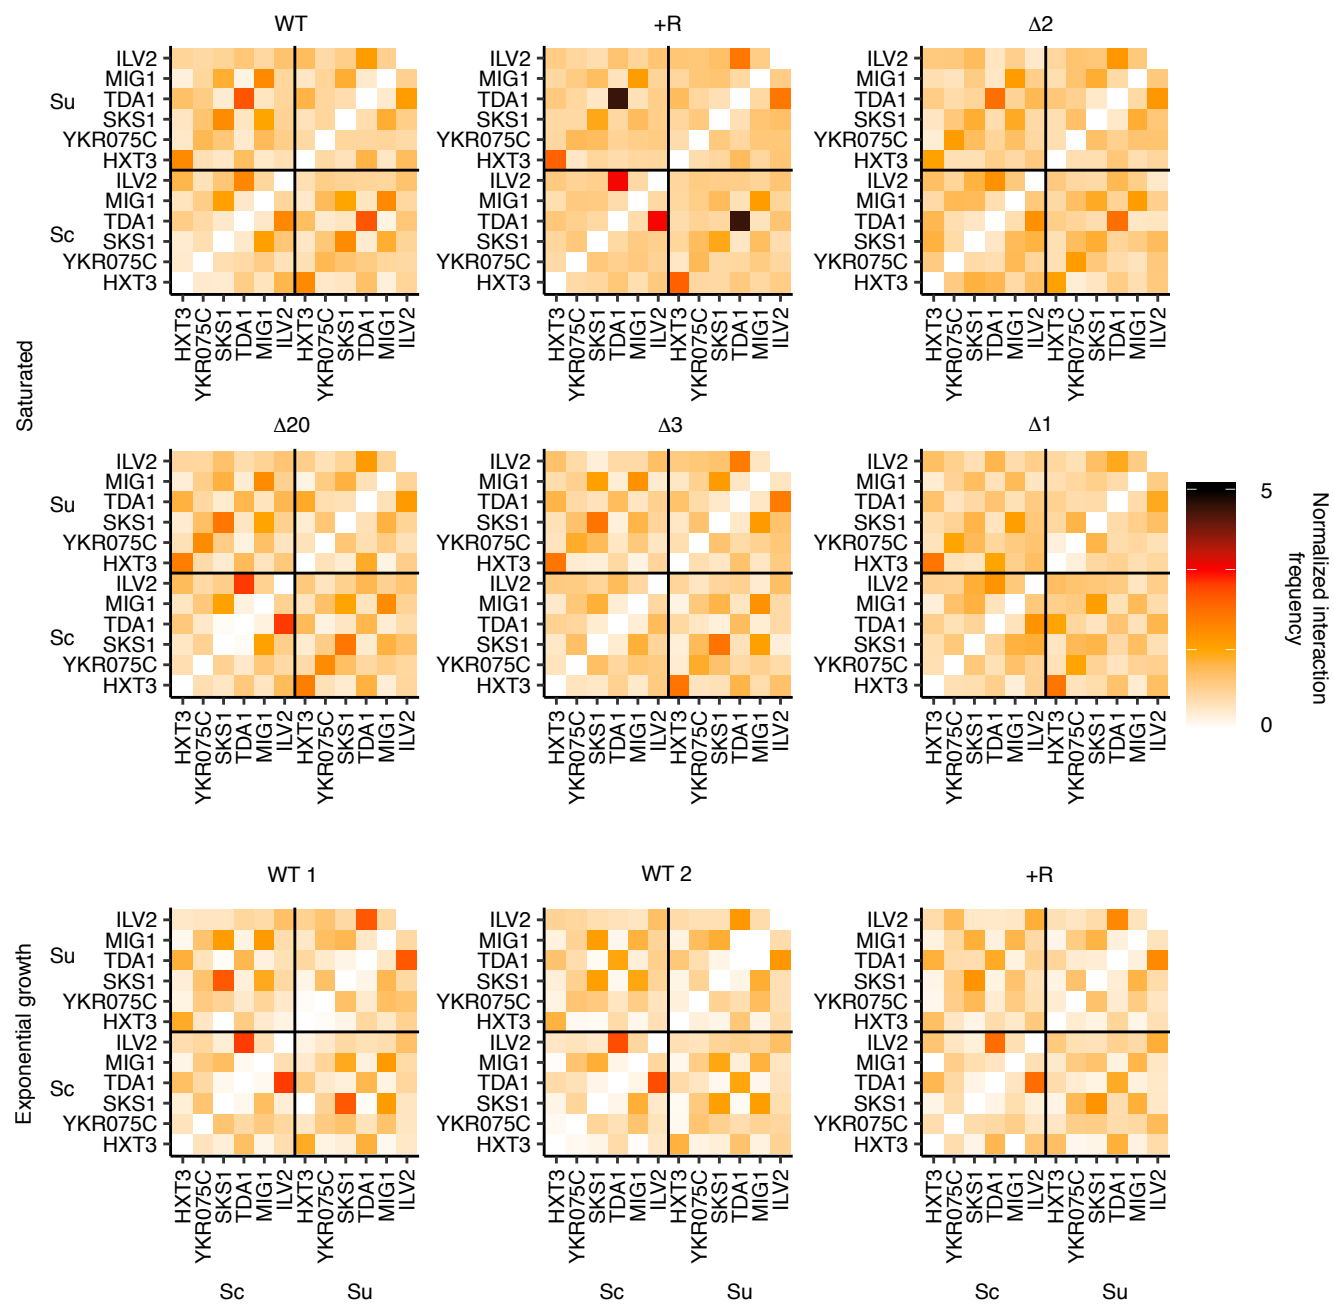

Supplement: supp [file elife-42499-supp-v1.zip]

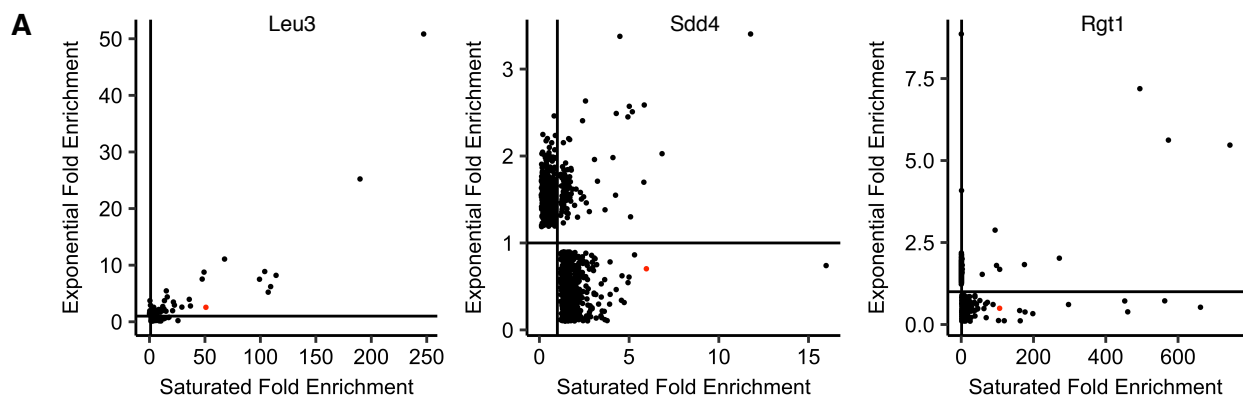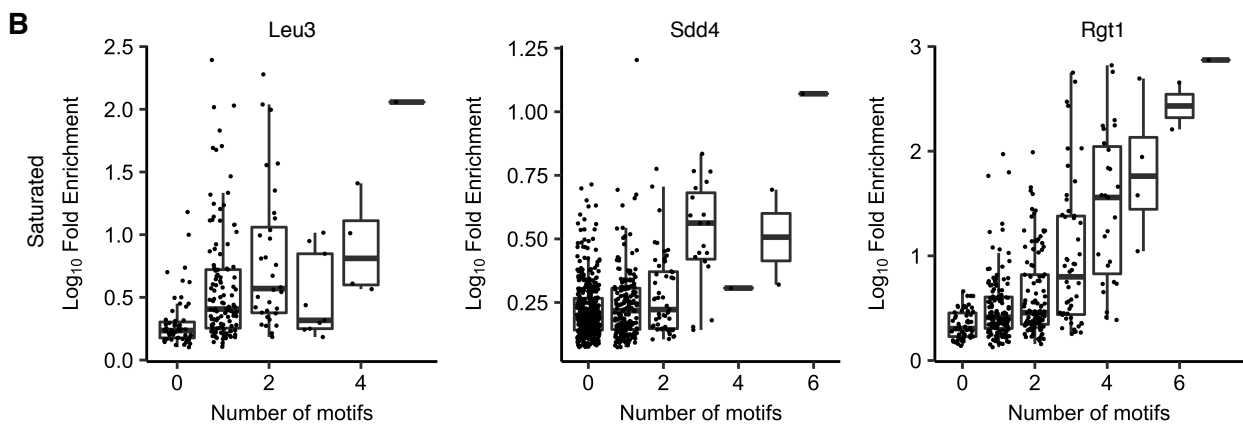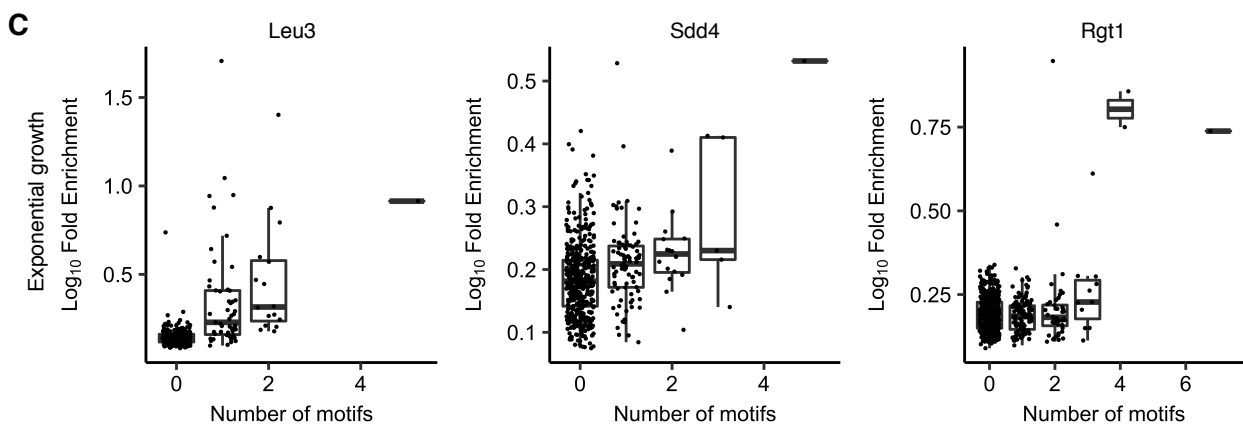

Supplement: supp [file elife-42499-supp-v1.zip]

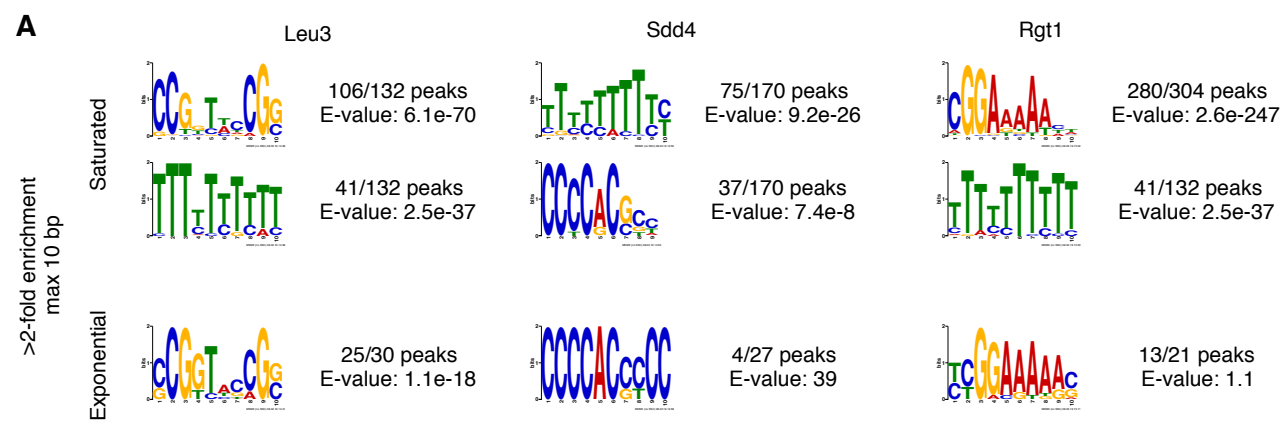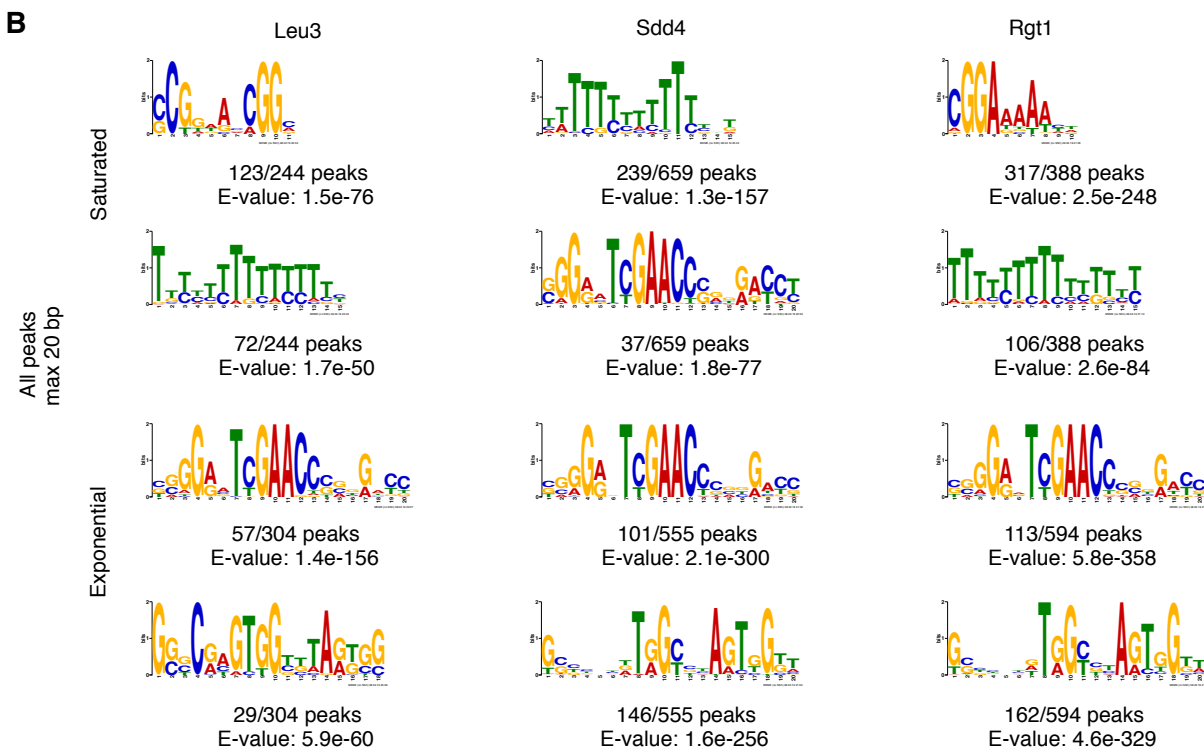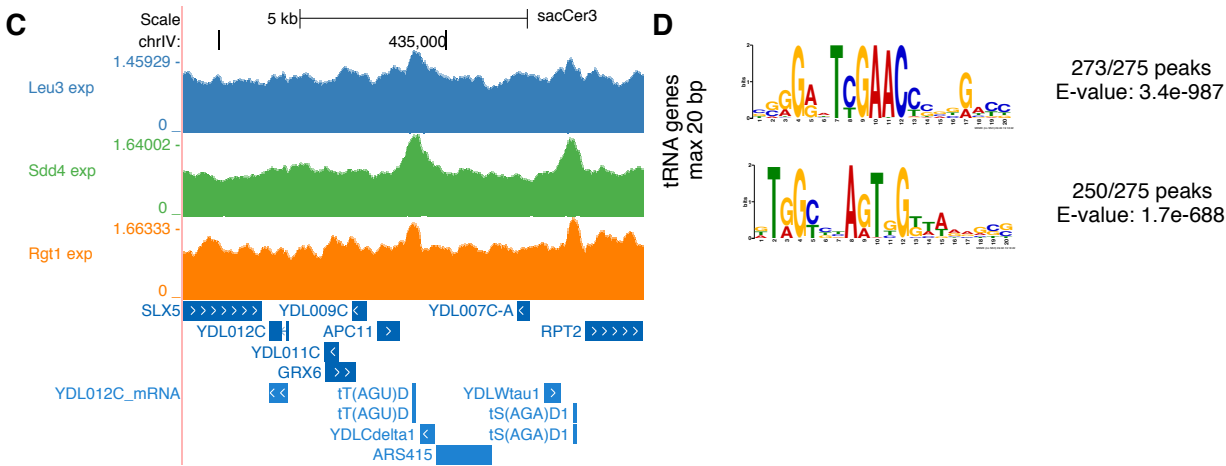

Supplement: supp [file elife-42499-supp-v1.zip]

**A**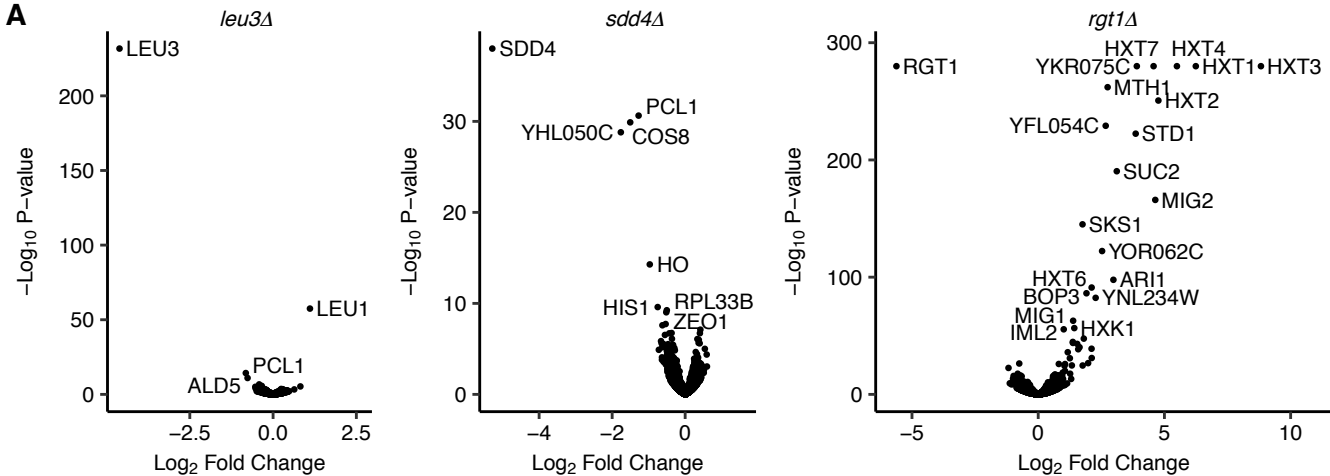**B**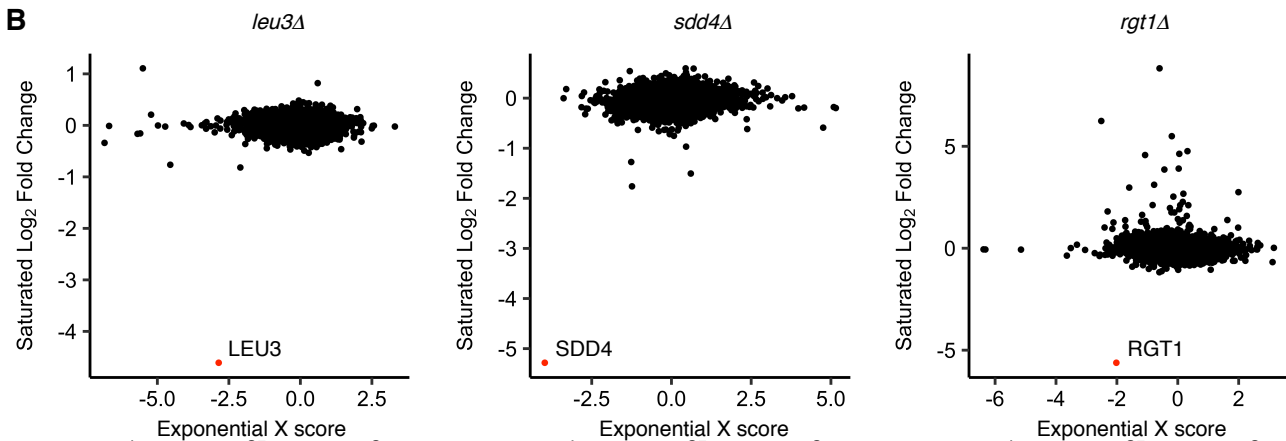

Supplement: supp [file elife-42499-supp-v1.zip]

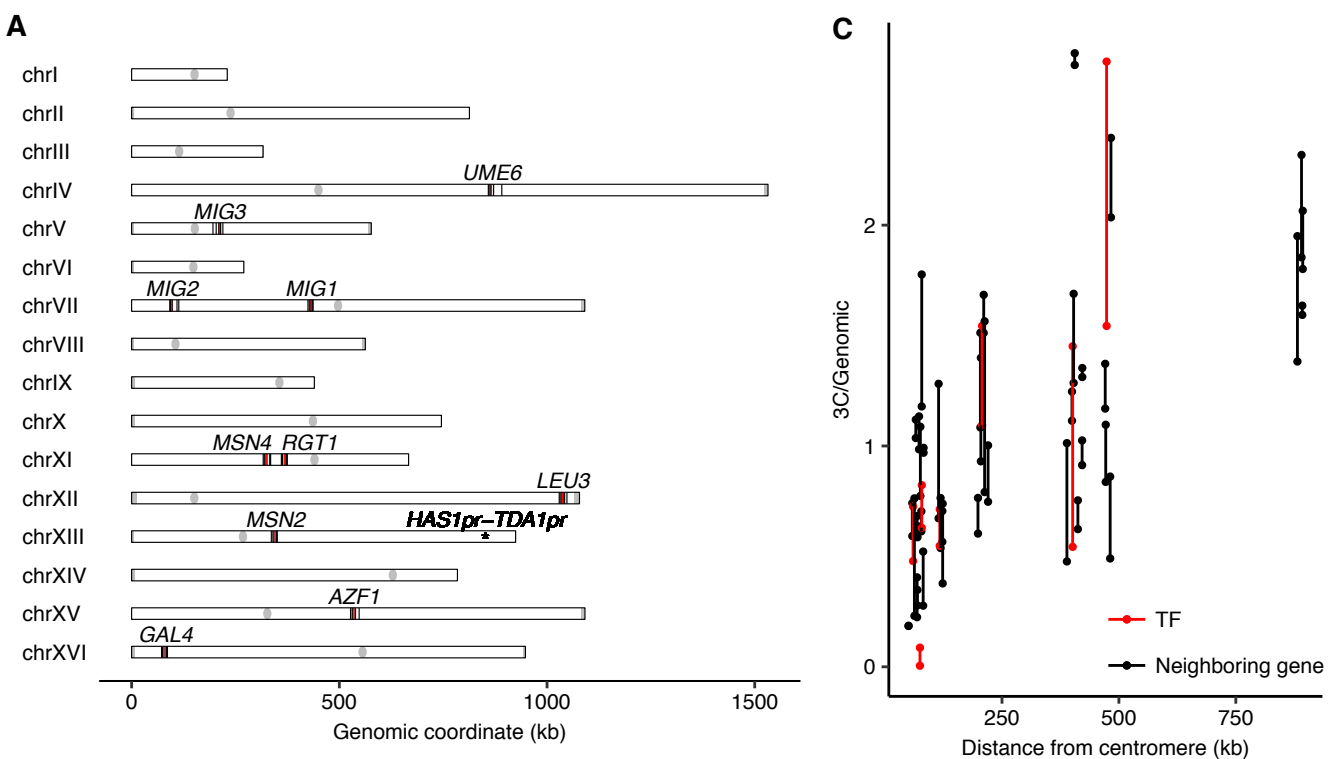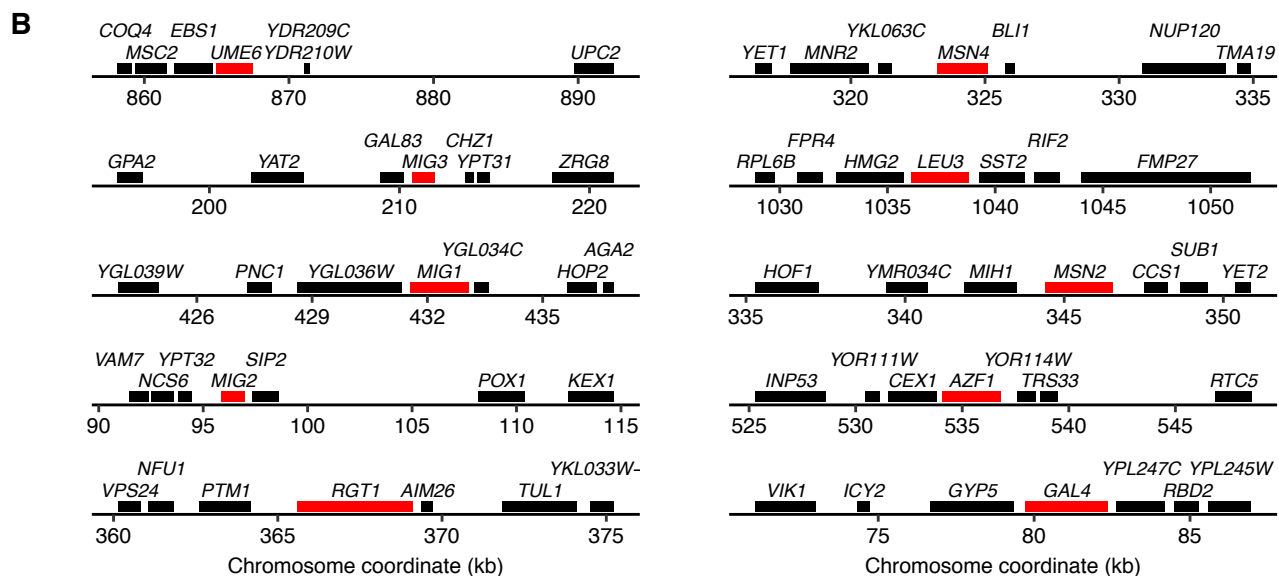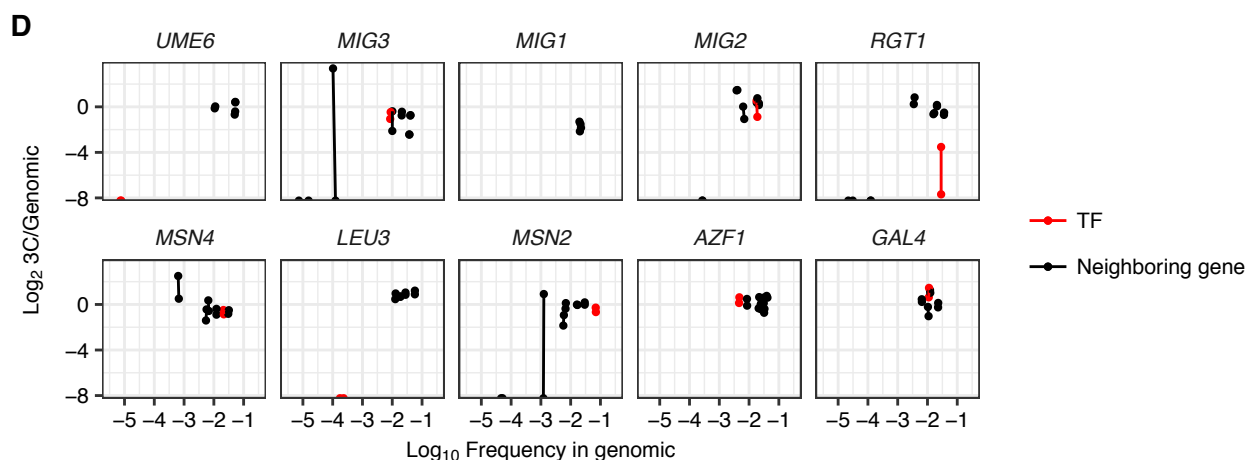

Supplement: supp [file elife-42499-supp-v1.zip]

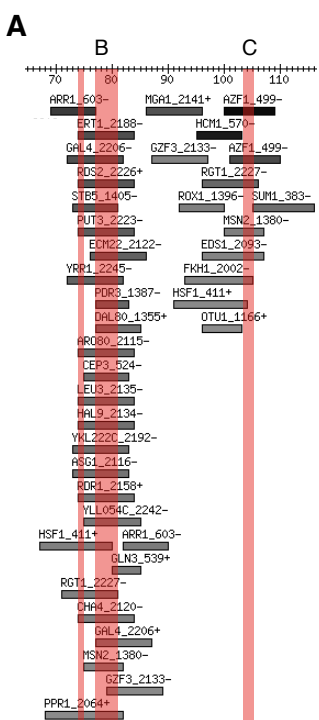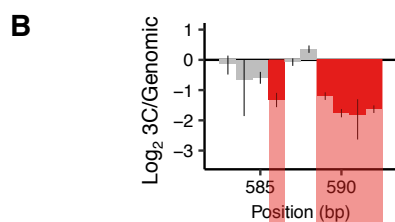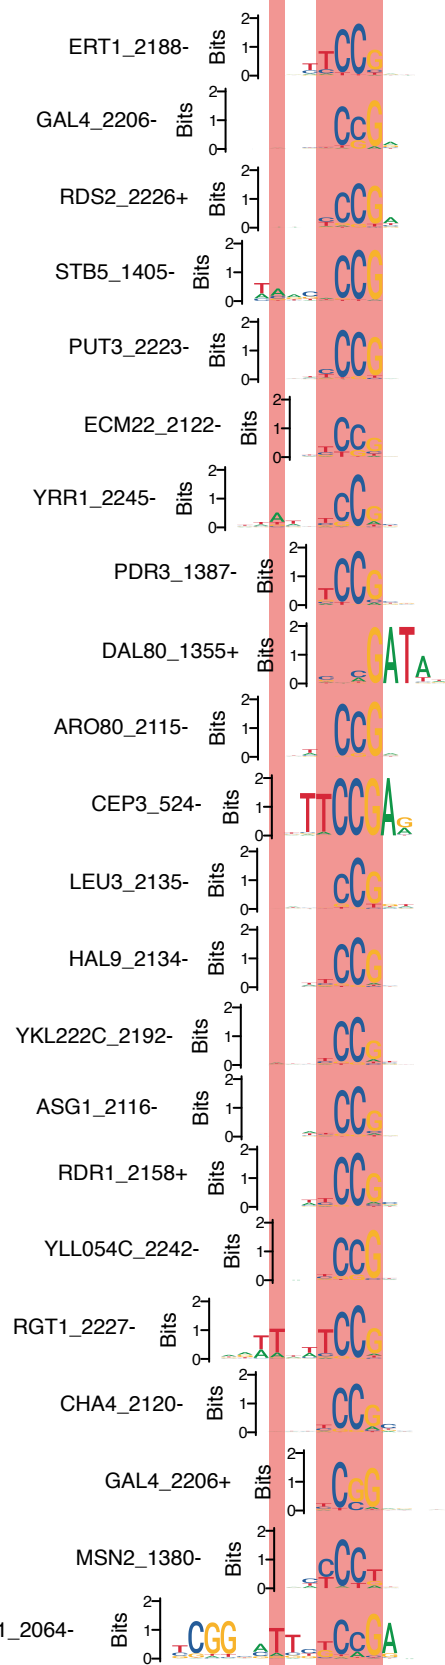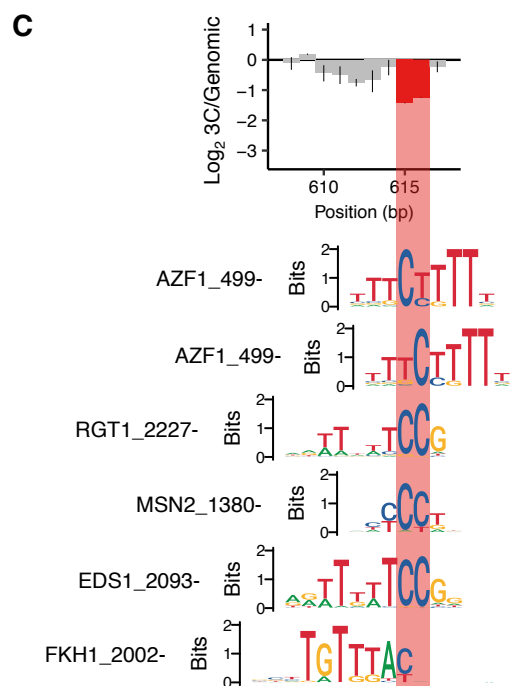

Supplement: supp [file elife-42499-supp-v1.zip]

**A**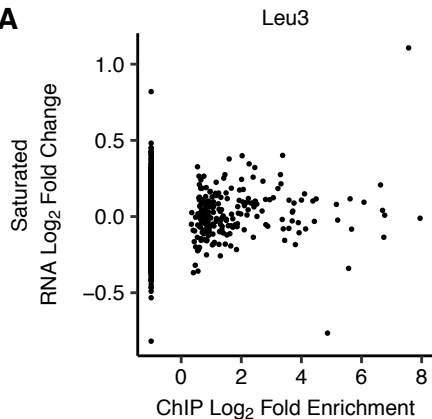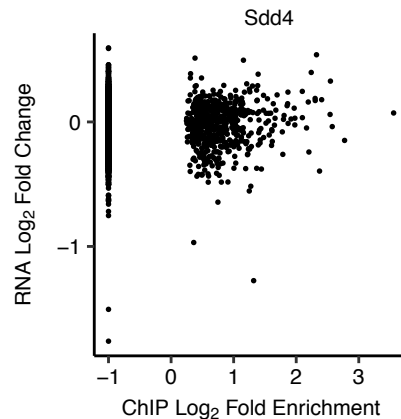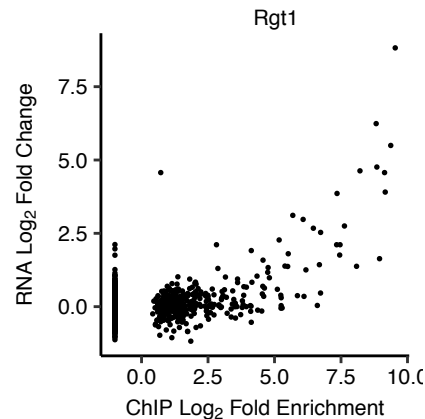**B**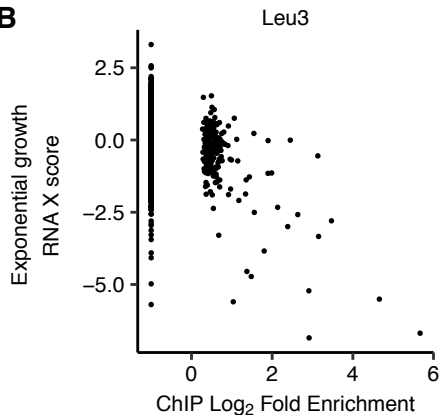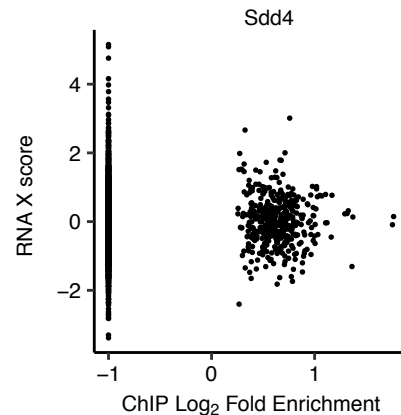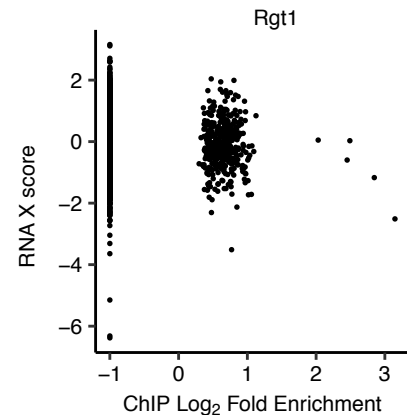

Supplement: supp [file elife-42499-supp-v1.zip]

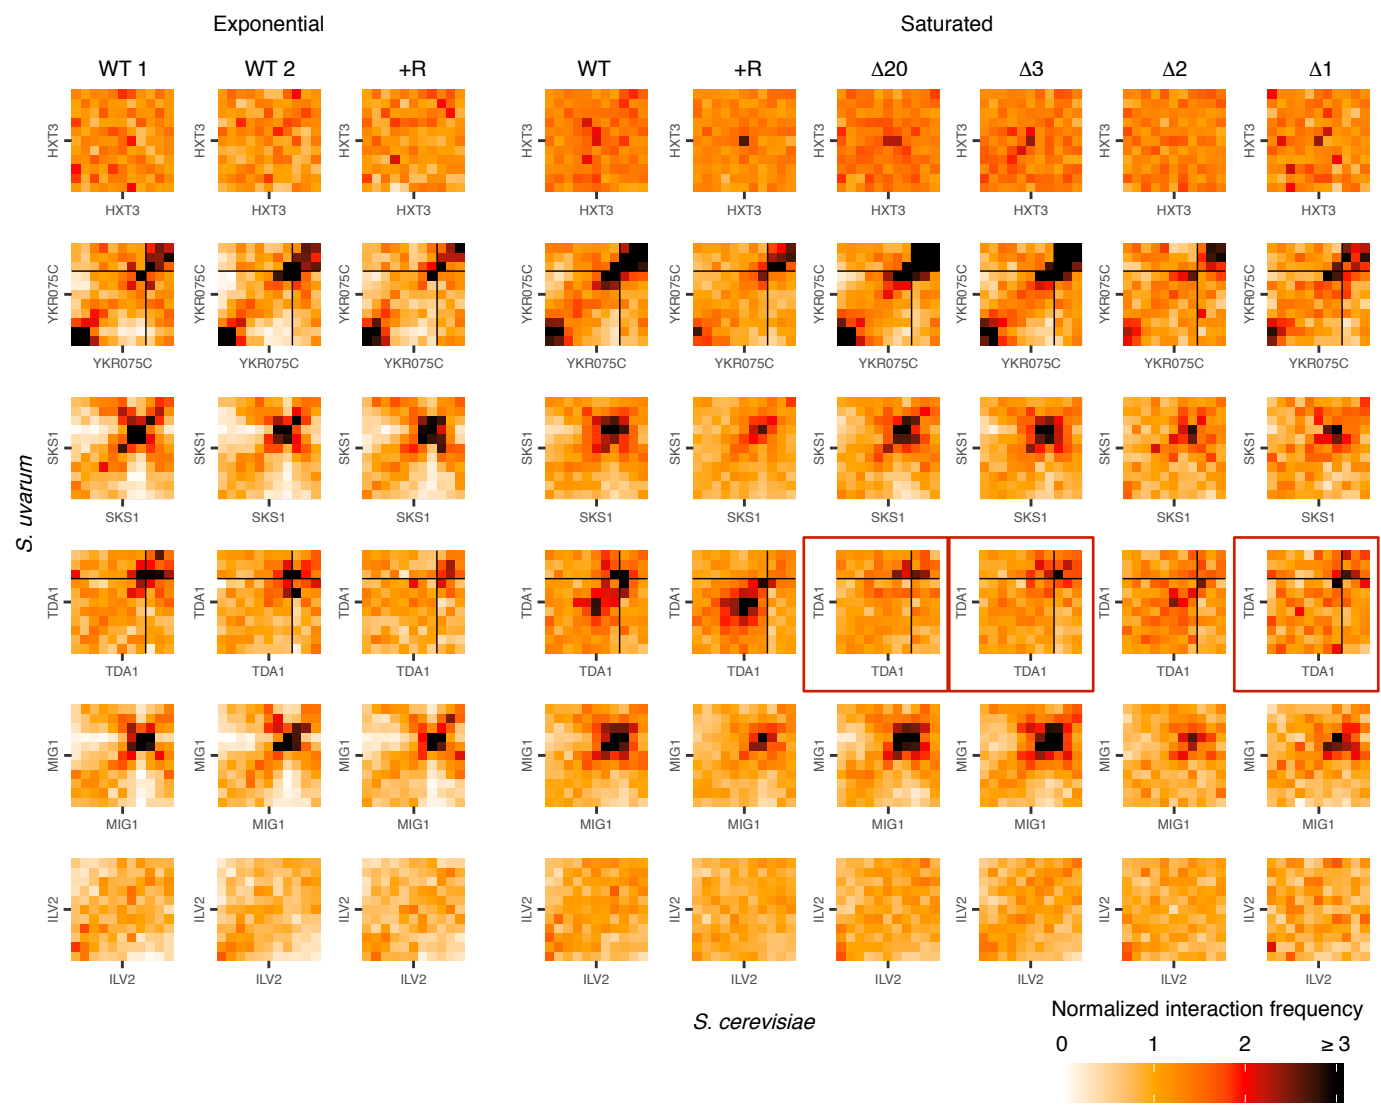

Supplement: supp [file elife-42499-supp-v1.zip]

Saturated

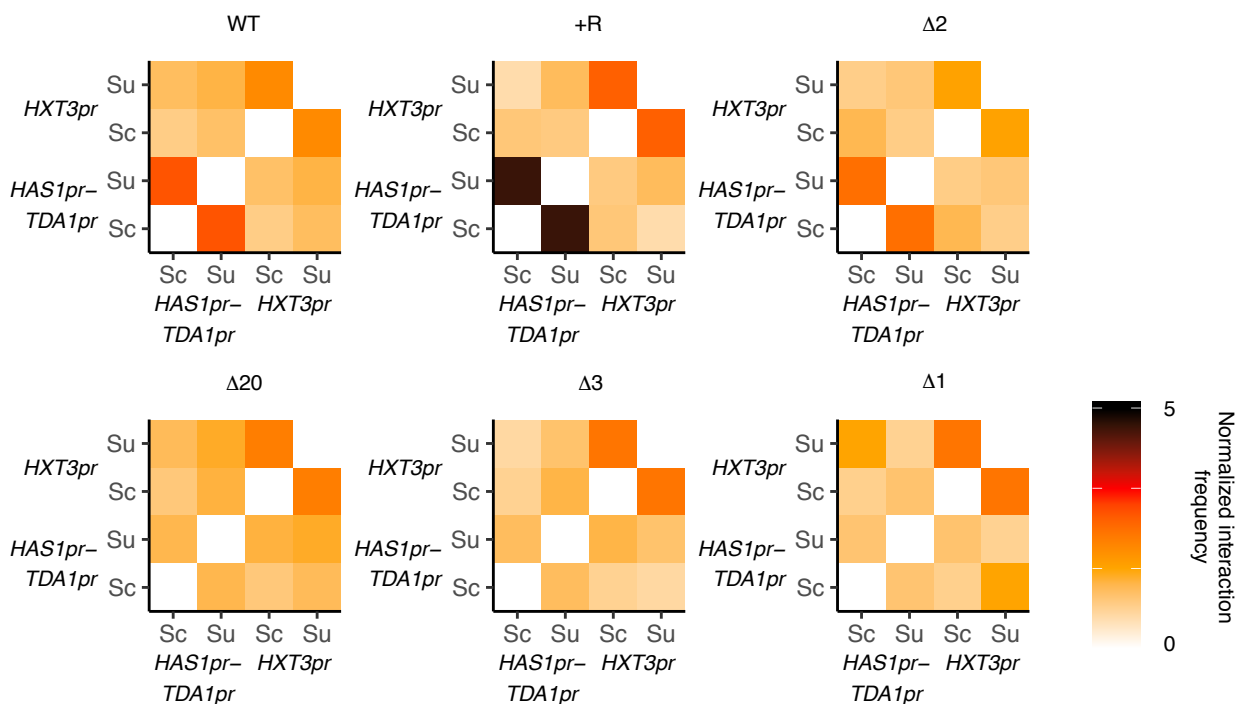

Exponential growth

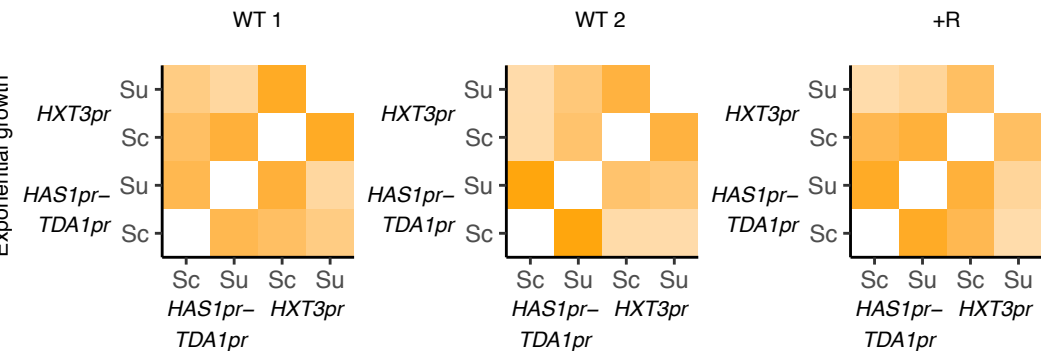

Supplement: supp [file elife-42499-supp-v1.zip]

**A**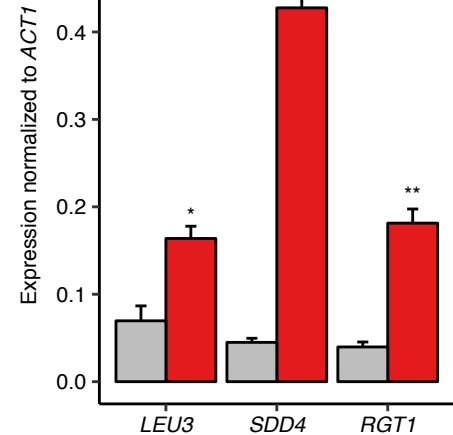**B**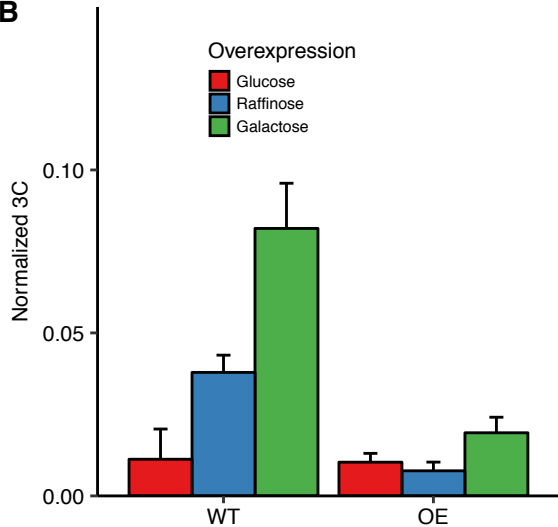

Supplement: supp [file elife-42499-supp-v1.zip]

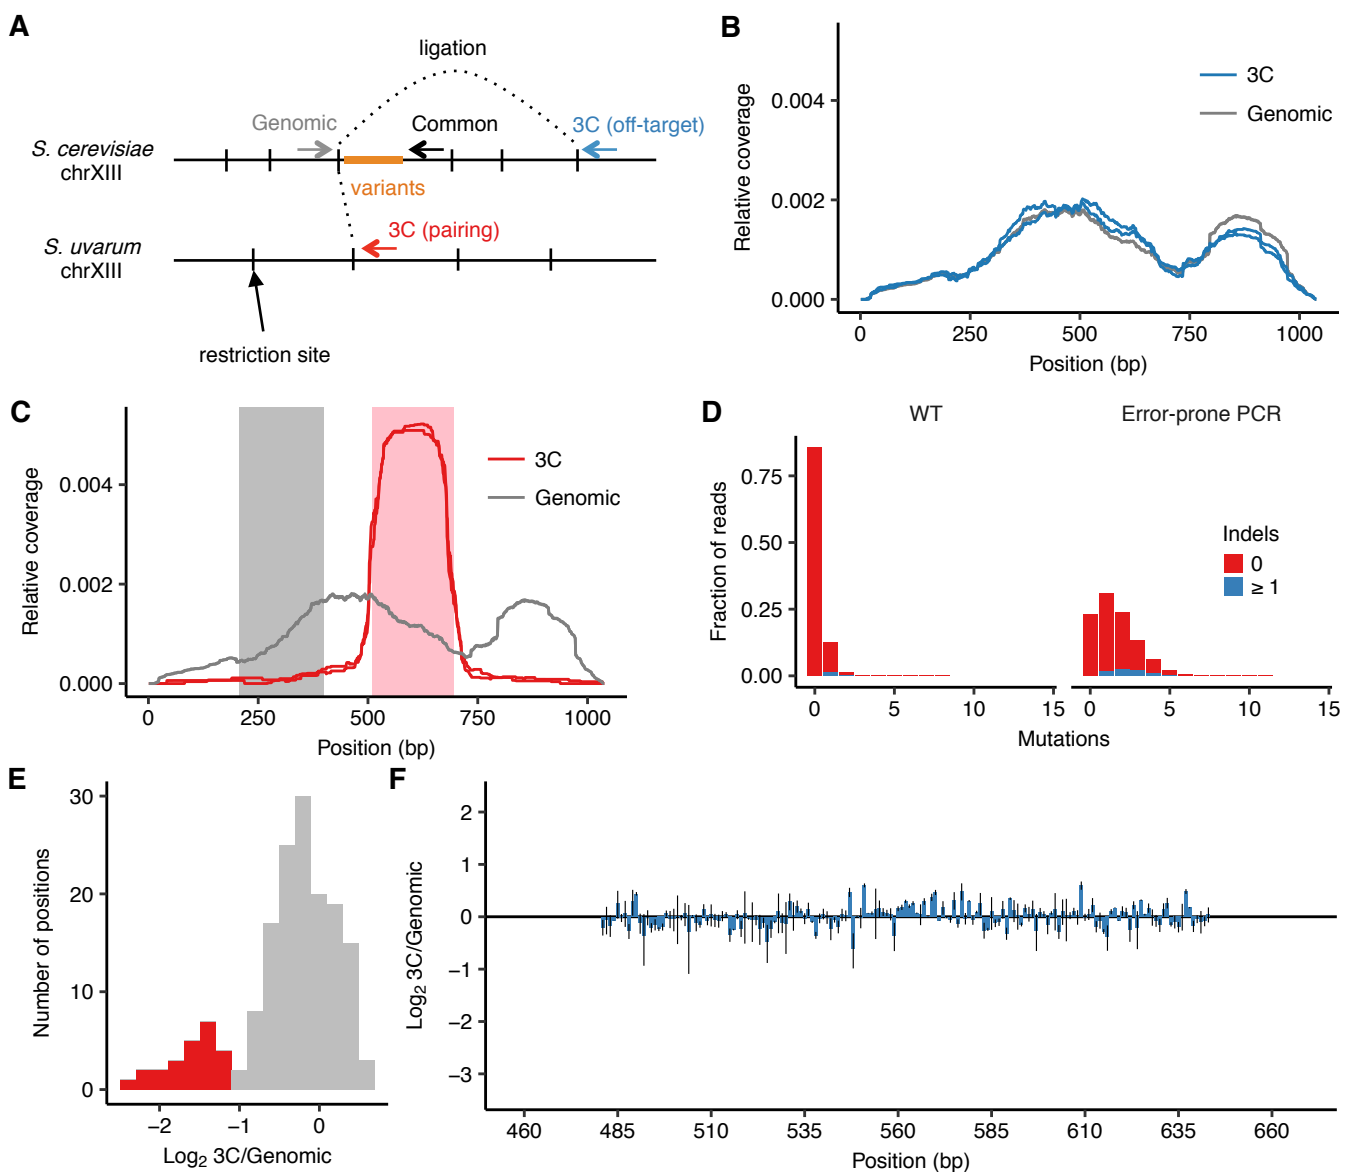

Supplement: supp [file elife-42499-supp-v1.zip]

■  $rA^+$  ■  $R^+a^-$  ■  $A^c$  ■  $R^c$  ■ Not expressed

R/r: repression, A/a: activation, c: constitutive

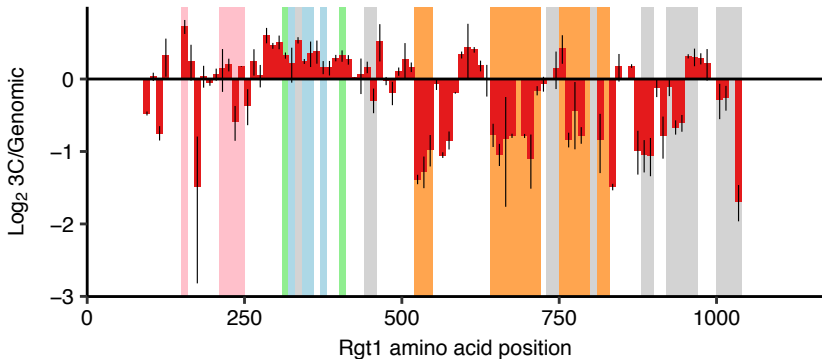

Supplement: supp [file elife-42499-supp-v1.zip › elife_poa_e42499_Figure_4_figure_supplement_2.pdf]

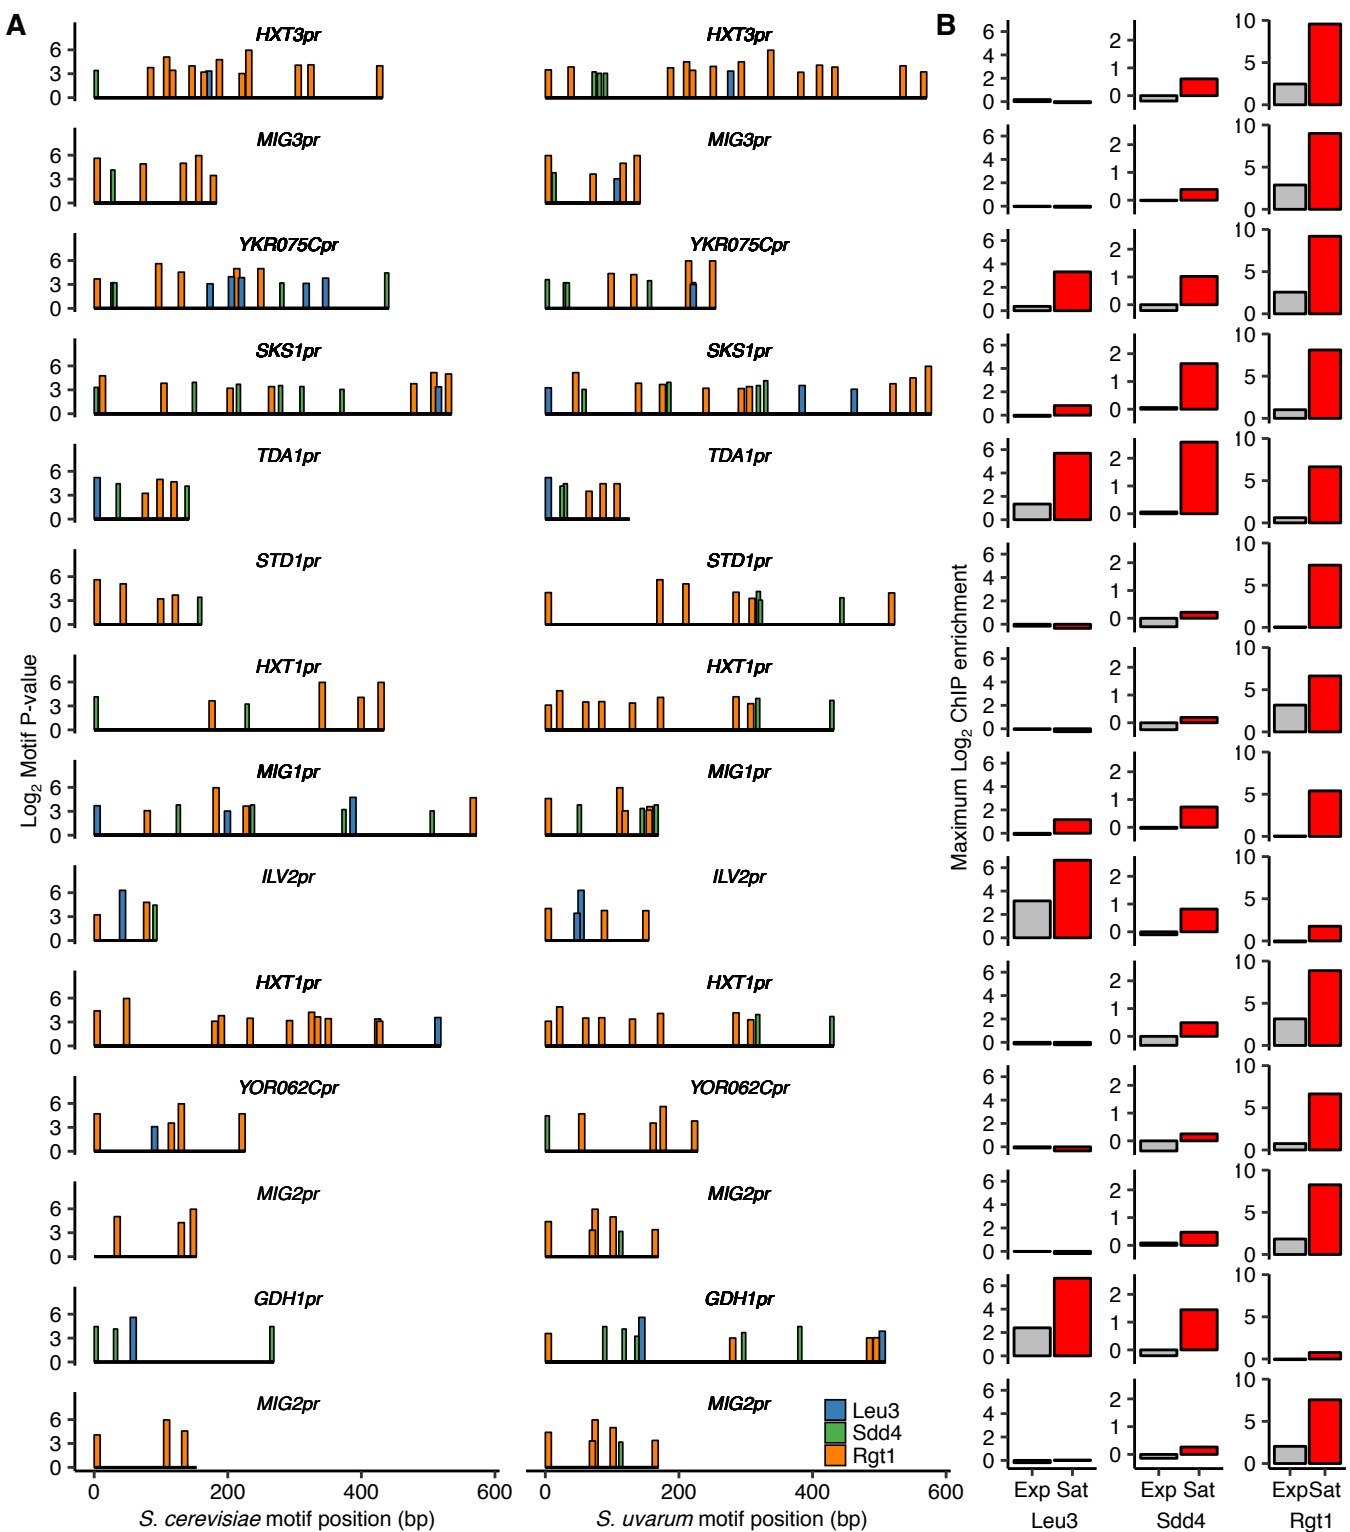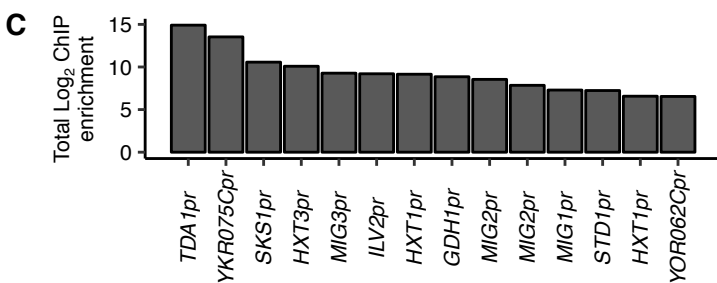

Supplement: supp [file elife-42499-supp-v1.zip › elife_poa_e42499_Figure_3_figure_supplement_1.pdf]
